# Supplementary material for: Chromosome-scale genomics, metabolomics, and transcriptomics provide insight into the synthesis and regulation of phenols in Vitis adenoclada grapes
Source: Frontiers journal article supplement (doi:10.3389/fpls.2023.1124046), 2023-01-25
Supplement: Data_Sheet_1.PDF [file Data_Sheet_1.PDF]

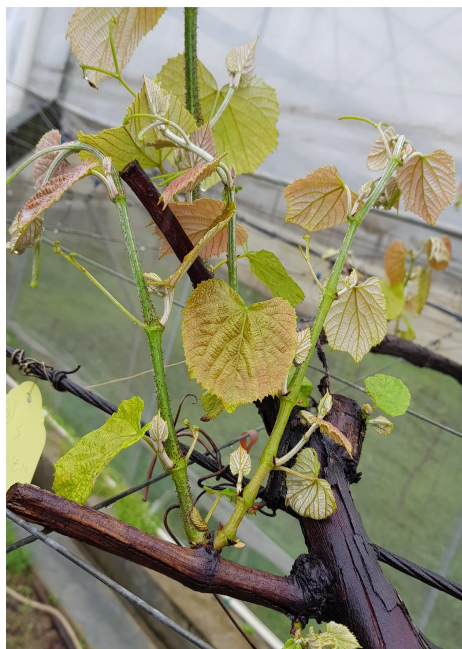

YN2

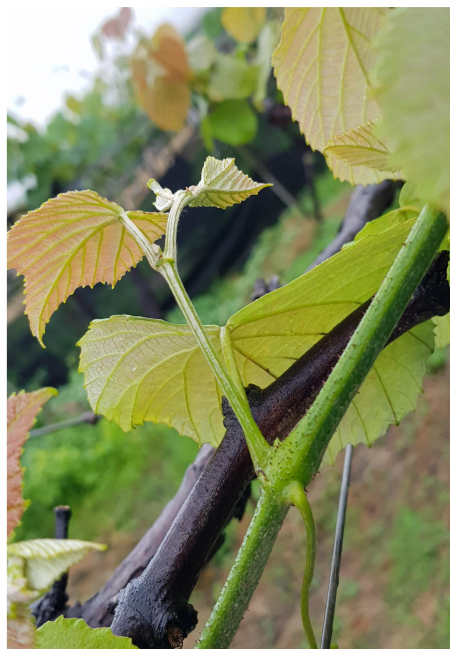

GH4

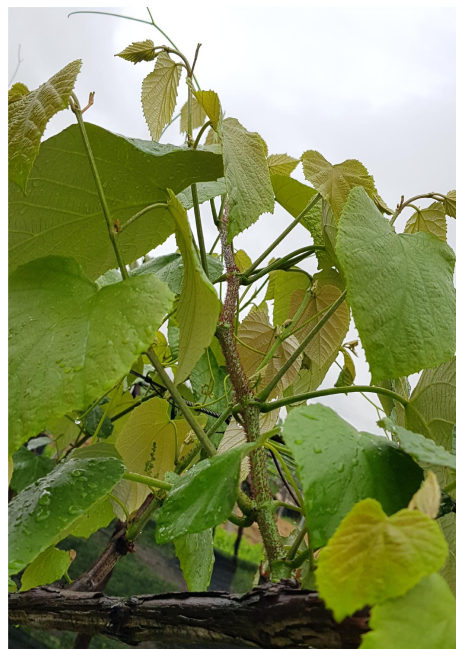

GH5

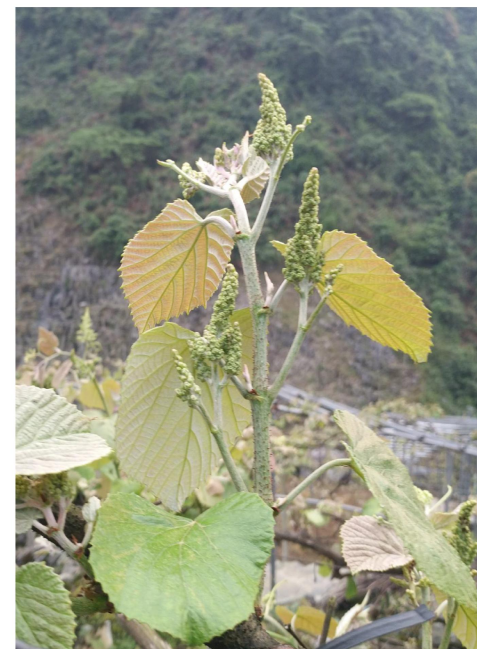

GH6

Supplementary Figure 1. Glandular hair characteristics of four *V. adenoclada* grape varieties



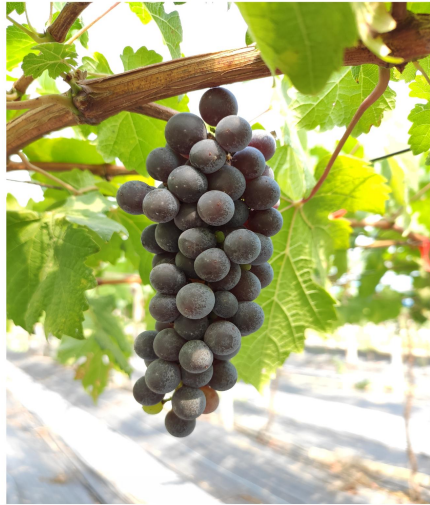

CS

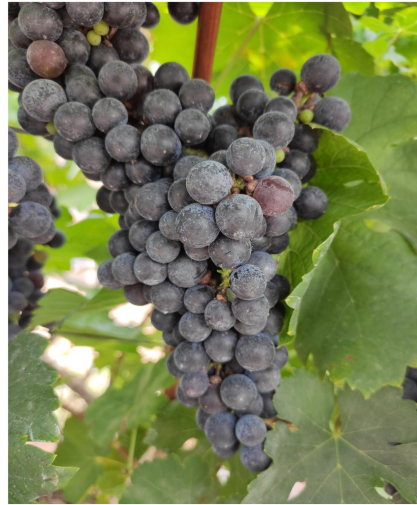

Mar

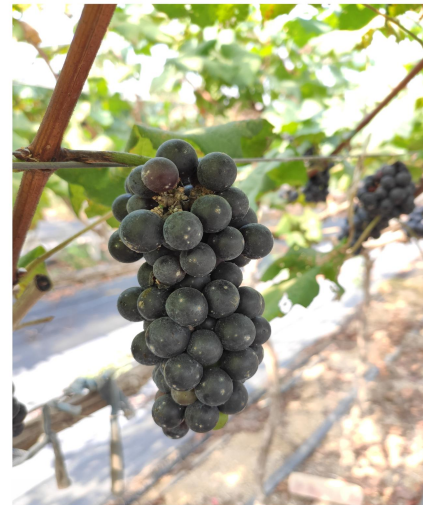

PV

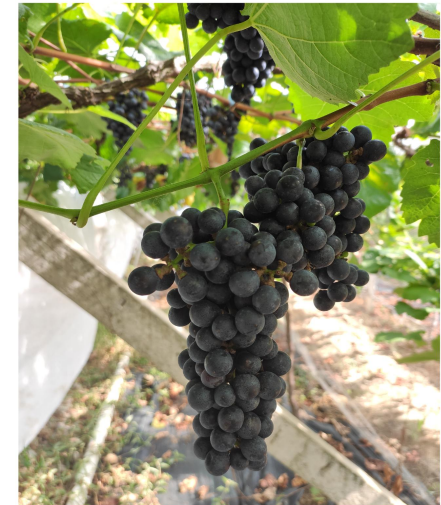

NW196

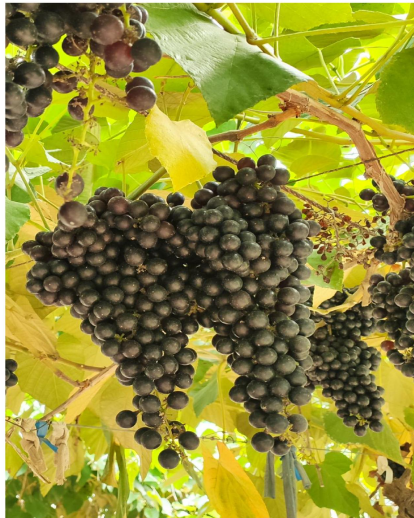

YN2

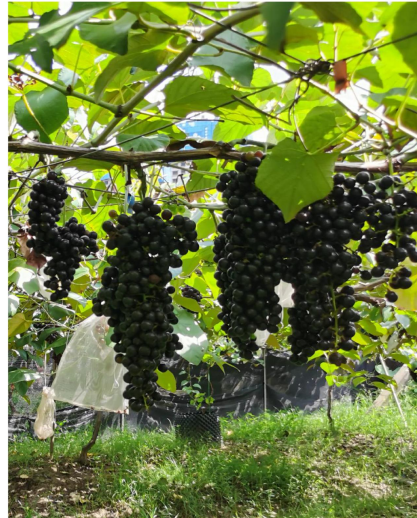

GH4

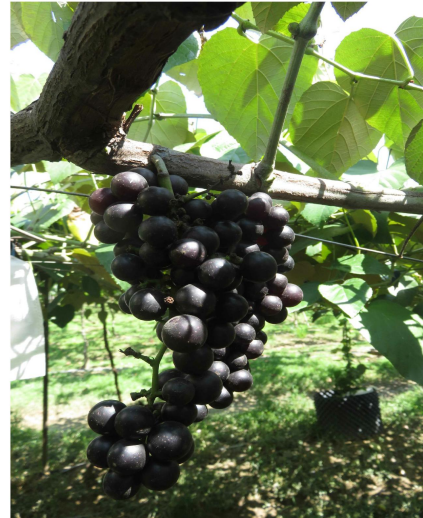

GH5

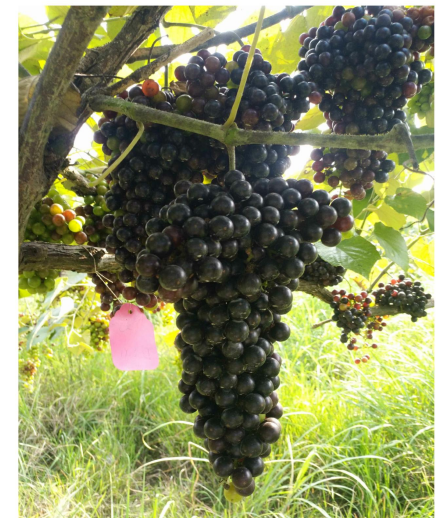

GH6

Supplementary Figure 2. Photos of eight grapes at harvest stage

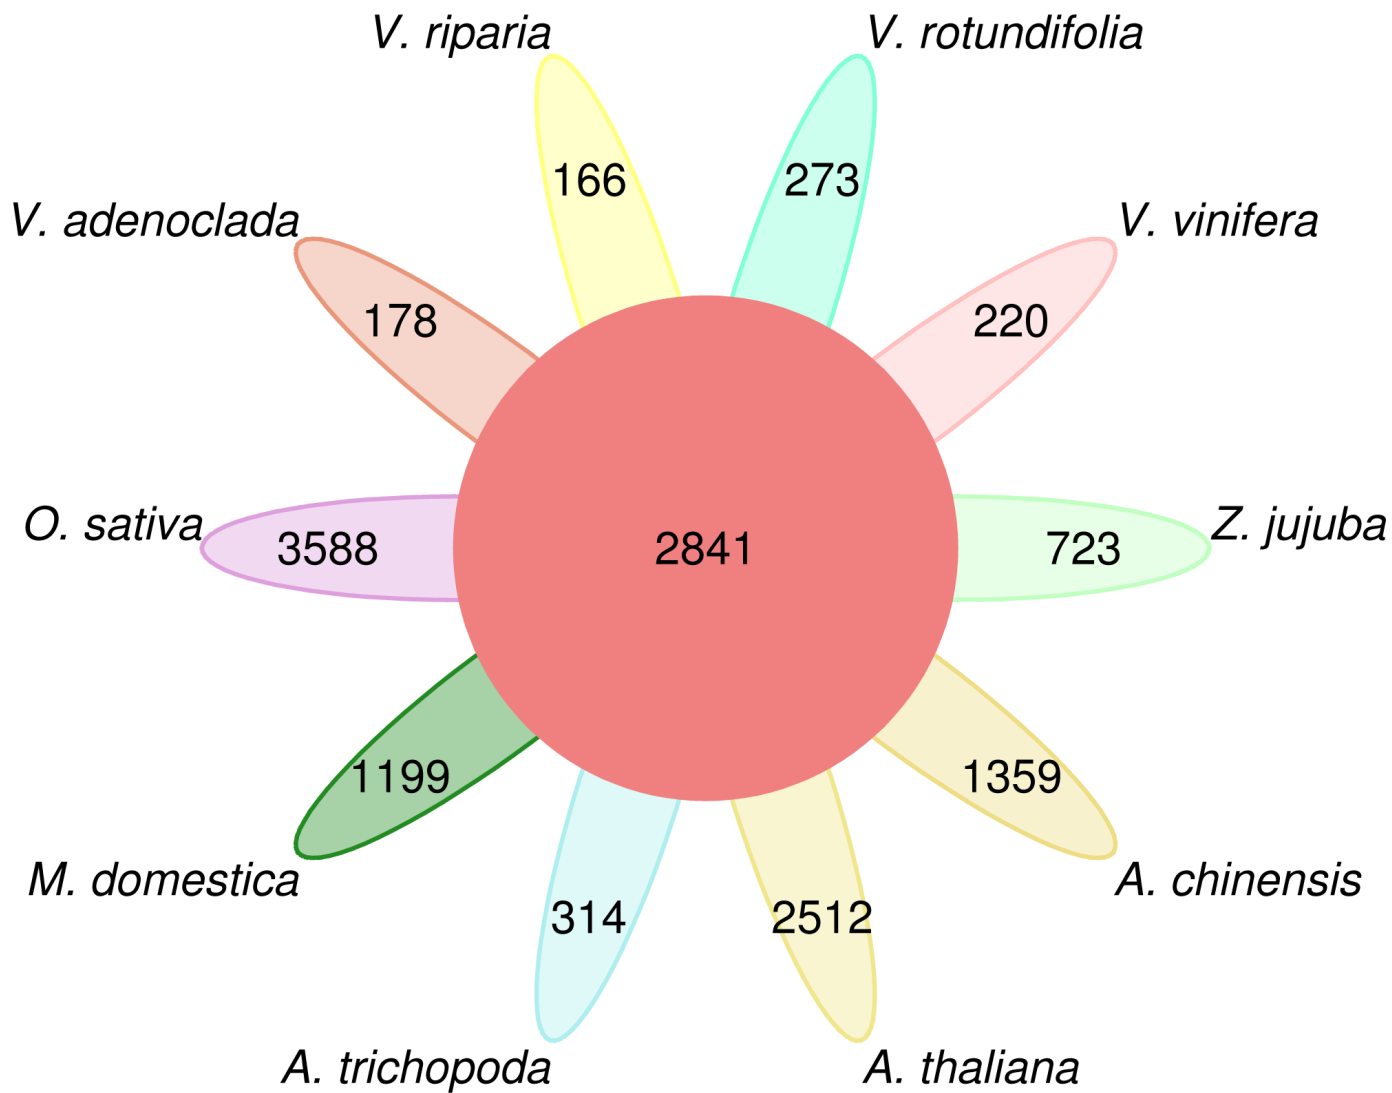

Supplementary Figure 3. The clustering of gene families

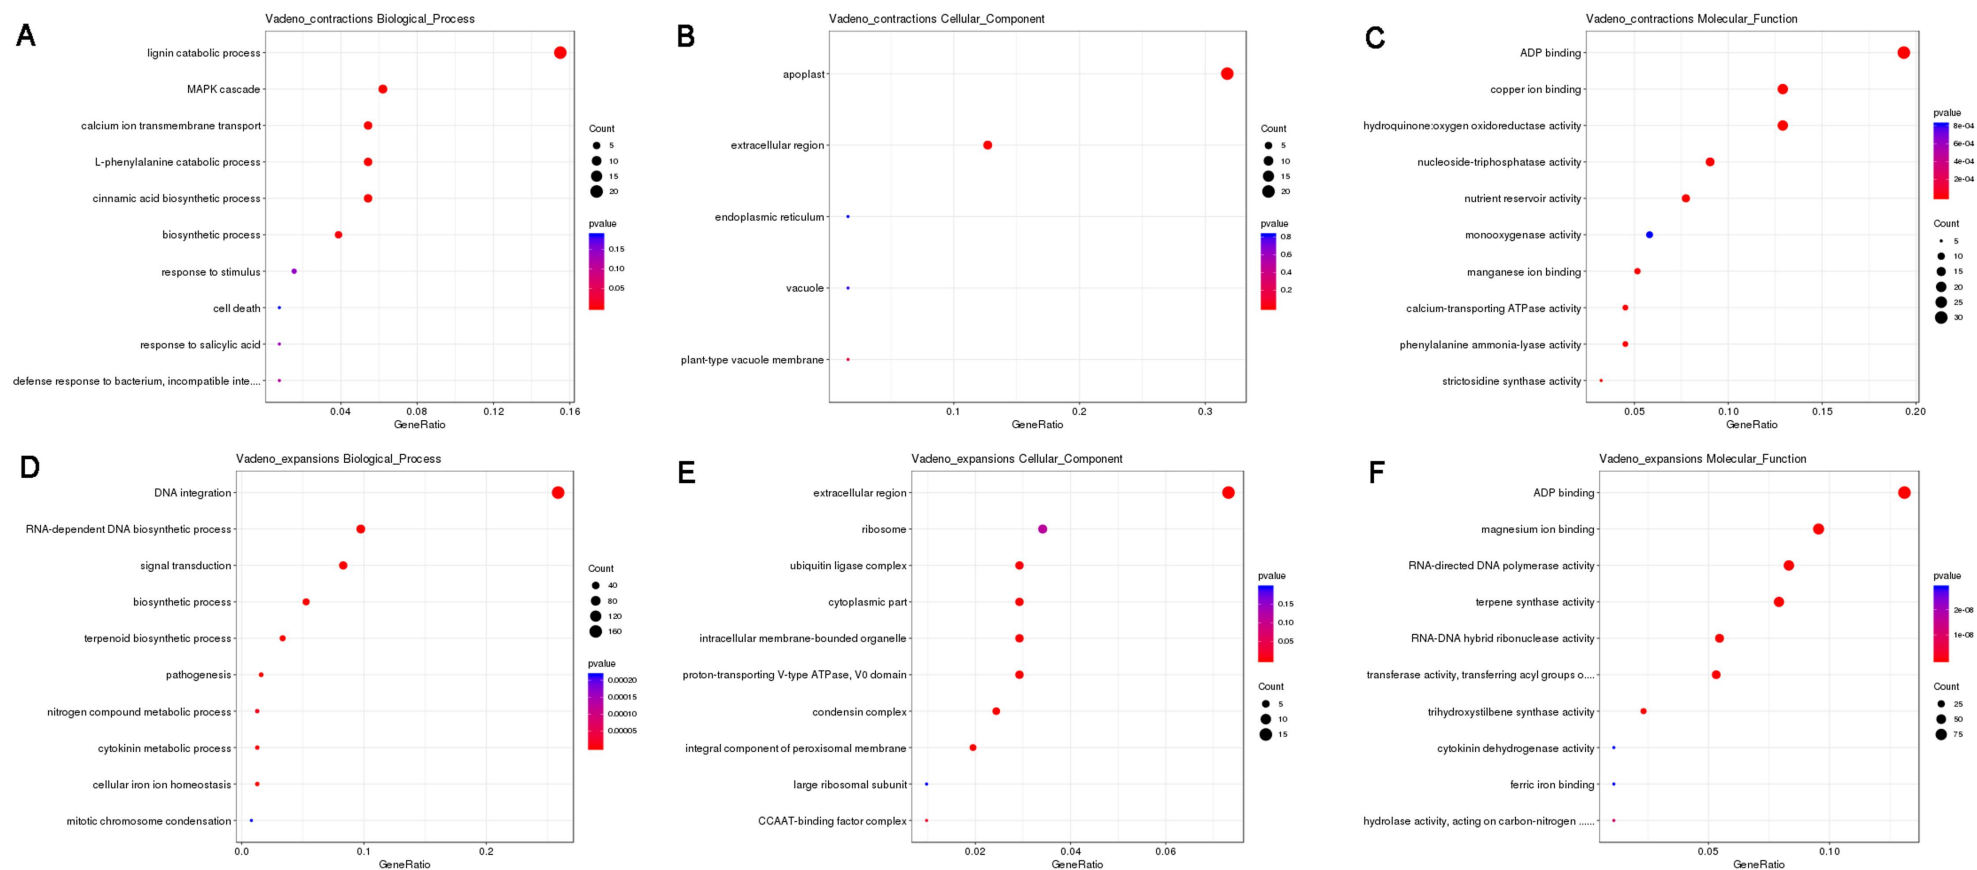

Supplementary Figure 4. GO enrichment analyses of expanded and contracted gene families



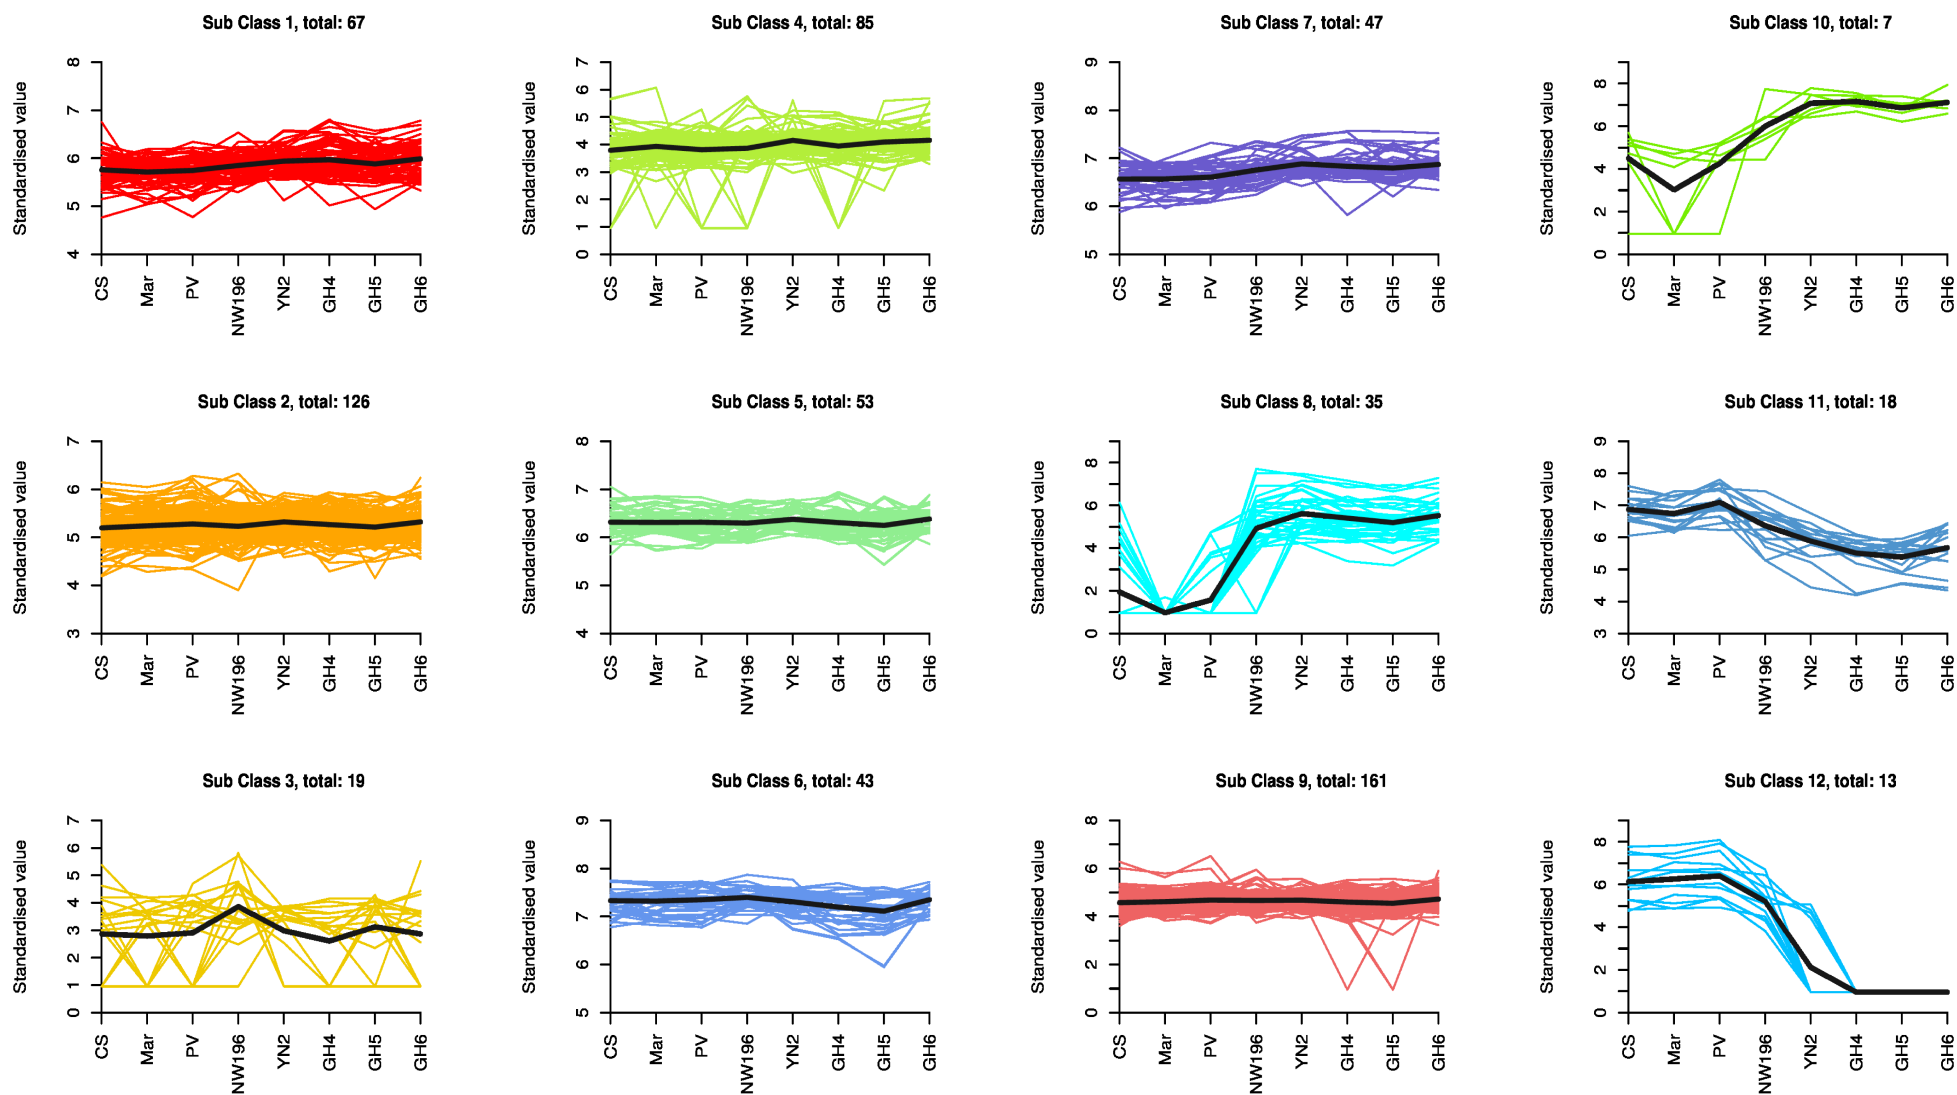

Supplementary Figure 5. K-means clustering analysis of patterns of 674 metabolites in eight grapes
