# Supplementary material for: Chromosome-scale genomics, metabolomics, and transcriptomics provide insight into the synthesis and regulation of phenols in Vitis adenoclada grapes
Source: Front Plant Sci. 2023 Jan 25;14:1124046. doi: 10.3389/fpls.2023.1124046 (PMC9907855; doi:10.3389/fpls.2023.1124046)
Supplement: Supplementary file 1 [file Table_1.xlsx]

## Sheet: Table S1
Supplementary Table 1. Estimation of GH6 (V. adenoclada) genome size.
Library inserted size	Data (Gb)	Depth (×)	Q20 (%)	Q30 (%)	GC content (%)
350 bp	28.97 Gb	55.26	96.24	90.26	35.85
K-mer	Main peak depth of k-mer	K-mer number	Estimated genome Size (Mb)	heterozygosity (%)	Repeated sequences proportion (%)
19	45	24097132651	524.23	0.62	49.18

## Sheet: Table S2
Supplementary Table 2. Statistics of nanopore sequencing and assembly data in GH6 (V. adenoclada).
Data type	Data (Gb)	Reads number	N50 length (bp)	N90 length (bp)	Mean length (bp)	Max length (bp)
Raw data	103.24	6732947	30368	16929	15333	250190
Clean data	94.99	3671717	30963	19104	25871	228235
Contig length (bp)	Contig number	Contig N50 (bp)	Contig N90 (bp)	Longest contig (bp)	GC content (%)	Gap total length (bp)
498209255	1595	2907640	135906	15445186	35.12	0

## Sheet: Table S3
Supplementary Table 3. Statistics of Hi-C sequencing data.
Type	Number
Total Read Pairs	182350813
Unique Paired Alignments	141802508
Valid Interaction Pairs	93128504
Dangling End Pairs	38222188
Re-ligation Pairs	1969866
Self-cycle Pairs	581417
Dumped Pairs	7900533

## Sheet: Table S4
Supplementary Table 4. Statistics of Hi-C assembly data in GH6 (V. adenoclada).
Scaffold number	Scaffold length (bp)	Scaffold N50 (bp)	Scaffold N90 (bp)	Longest scaffold (bp)	Gap total length (bp)
1014	498267955	24258092	15607001	36734939	58700
Contig number	Contig length (bp)	Contig N50 (bp)	Contig N90 (bp)	Longest contig (bp)	GC content (%)
1601	498209255	2851124	135906	15445186	35.12

## Sheet: Table S5
Supplementary Table 5. Statistics of 19 assembled chromosomes in GH6 (V. adenoclada).
Group	Cluster number	Cluster length (bp)	Order number	Order length (bp)
LG01	7	24318635	5	24257692
LG02	37	18575921	17	17757315
LG03	45	20691051	29	20124946
LG04	27	27738035	20	27511131
LG05	33	24642956	22	24120958
LG06	26	22974653	15	22355789
LG07	72	33477865	37	31433011
LG08	25	24293165	12	23793809
LG09	67	25178049	42	23621597
LG10	63	27781269	30	26369259
LG11	21	19840522	14	19434725
LG12	114	29680774	67	27749165
LG13	95	29331752	66	27382266
LG14	40	27188526	21	25876946
LG15	56	20917989	37	20098346
LG16	60	22704076	43	22063095
LG17	29	16274204	13	15605801
LG18	95	38067375	57	36729339
LG19	92	27764238	59	26178064
Total (Ratio %)	1004 (62.71)	481,441,055 (96.63)	606 (60.36)	462,463,254 (96.06)

## Sheet: Table S6
Supplementary Table 6. Assessment of completeness of the genome assembly using BUSCO.
Complete BUSCOs	Complete and single-copy BUSCOs	Complete and duplicated BUSCOs	Fragmented BUSCOs	Missing BUSCOs	Total Lineage BUSCOs
1463 (90.64%)	1431 (88.66%)	32 (1.98%)	55 (3.41%)	96 (5.95%)	1614

## Sheet: Table S7
Supplementary Table 7. Statistics of TEs in GH6 (V. adenoclada) genome.
Type	Number	Length	Rate(%)
ClassI:Retroelement	250882	175793938	35.28
ClassI/DIRS	2	82	0
ClassI/LINE	39176	21379597	4.29
ClassI/LTR/Caulimovirus	3087	2849761	0.57
ClassI/LTR/Copia	64286	51876026	10.41
ClassI/LTR/ERV	1847	142996	0.03
ClassI/LTR/Gypsy	41281	50100145	10.05
ClassI/LTR/Ngaro	214	14133	0
ClassI/LTR/Pao	88	5512	0
ClassI/LTR/Unknown	96953	48928946	9.82
ClassI/SINE	3948	496740	0.1
ClassII:DNA transposon	141060	45985151	9.23
ClassII/CACTA	2776	1498633	0.3
ClassII/Crypton	69	3624	0
ClassII/Dada	308	16499	0
ClassII/Ginger	97	5247	0
ClassII/Helitron	790	371380	0.07
ClassII/IS3EU	134	7455	0
ClassII/Kolobok	314	19416	0
ClassII/Maverick	45	2615	0
ClassII/Merlin	197	10873	0
ClassII/Mutator	4121	3325012	0.67
ClassII/P	115	6759	0
ClassII/PIF-Harbinger	2301	857752	0.17
ClassII/PiggyBac	85	4809	0
ClassII/Tc1-Mariner	238	13654	0
ClassII/Unknown	123324	36850195	7.4
ClassII/Zisupton	71	3798	0
ClassII/hAT	6075	2987430	0.6
Unknown	17	1066	0
Total	391959	221780155	44.51

## Sheet: Table S8
Supplementary Table 8. Statistics of protein-coding genes in GH6 (V. adenoclada) genome.
Gene nummber	Gene length (bp)	Average gene length (bp)	Exon length (bp)	Average exon length (bp)	Intron length (bp)	Average intron length (bp)
28660	150745759	5259.79	35195235	252.45	115550524	828.84
Annotation database	Annotated number	Percentage(%)
GO	18136	63.28
KEGG	9904	34.56
KOG	14458	50.45
TrEMBL	27511	95.99
NR	27403	95.61
All Annotated	27711	96.69

## Sheet: Table S9
Supplementary Table 9. The functional annotation of protein-coding genes in GH6 (V. adenoclada) genome.
Gene ID	GO annotation	KEGG annotation	KOG class	KOG class annotation	TrEMBL annotation	NR annotation
Vad03G011300.1	--	K17964|0|vvi:100251738|K17964 leucine-rich PPR motif-containing protein, mitochondrial | (RefSeq) pentatricopeptide repeat-containing protein At5g61990, mitochondrial	[R]	General function prediction only	Putative uncharacterized protein {ECO:0000313|EMBL:CBI34098.3} OS=Vitis vinifera (Grape) PE=4 SV=1	unnamed protein product [Vitis vinifera]
Vad14G003590.1	Cellular Component: integral component of membrane (GO:0016021);; Molecular Function: transmembrane transporter activity (GO:0022891);; Biological Process: transmembrane transport (GO:0055085);;	--	[R]	General function prediction only	Putative uncharacterized protein {ECO:0000313|EMBL:CBI34335.3} OS=Vitis vinifera (Grape) PE=3 SV=1	unnamed protein product [Vitis vinifera]
Vad06G010980.1	Molecular Function: magnesium ion transmembrane transporter activity (GO:0015095);; Biological Process: magnesium ion transport (GO:0015693);;	K16075|0|vvi:100246455|K16075 magnesium transporter | (RefSeq) magnesium transporter MRS2-11, chloroplastic	[P]	Inorganic ion transport and metabolism	Putative uncharacterized protein {ECO:0000313|EMBL:CCB44201.1} OS=Vitis vinifera (Grape) PE=4 SV=1	unnamed protein product [Vitis vinifera]
Vad11G004340.1	--	--	[GOU]	--	Putative uncharacterized protein {ECO:0000313|EMBL:CCB51556.1} OS=Vitis vinifera (Grape) PE=4 SV=1	PREDICTED: GDP-mannose transporter GONST4 isoform X1 [Vitis vinifera]
Vad15G003520.1	Cellular Component: cytoskeleton (GO:0005856);; Biological Process: multidimensional cell growth (GO:0009825);; Biological Process: trichome morphogenesis (GO:0010090);; Biological Process: regulation of actin filament polymerization (GO:0030833);;	K05754|2.4508e-96|vvi:100252961|K05754 actin related protein 2/3 complex, subunit 5 | (RefSeq) actin-related protein 2/3 complex subunit 5-like	[Z]	Cytoskeleton	Actin-related protein 2/3 complex subunit 5 {ECO:0000256|RuleBase:RU004301} OS=Vitis vinifera (Grape) PE=3 SV=1	PREDICTED: actin-related protein 2/3 complex subunit 5A [Vitis vinifera]
Vad10G011880.1	Molecular Function: potassium ion transmembrane transporter activity (GO:0015079);; Cellular Component: membrane (GO:0016020);; Biological Process: potassium ion transmembrane transport (GO:0071805);;	K03549|0|vvi:100249626|K03549 KUP system potassium uptake protein | (RefSeq) probable potassium transporter 13	--	--	Potassium transporter {ECO:0000256|RuleBase:RU321113} OS=Vitis vinifera (Grape) PE=3 SV=1	PREDICTED: probable potassium transporter 13 isoform X1 [Vitis vinifera]
Vad15G002230.1	Molecular Function: RNA binding (GO:0003723);; Molecular Function: RNA-directed DNA polymerase activity (GO:0003964);; Molecular Function: iron ion binding (GO:0005506);; Biological Process: RNA-dependent DNA biosynthetic process (GO:0006278);; Biological Process: fatty acid biosynthetic process (GO:0006633);; Biological Process: DNA integration (GO:0015074);; Cellular Component: integral compone…	K15404|0|vvi:100256874|K15404 aldehyde decarbonylase [EC:4.1.99.5] | (RefSeq) protein ECERIFERUM 1	--	--	Putative uncharacterized protein {ECO:0000313|EMBL:CBI38118.3} OS=Vitis vinifera (Grape) PE=4 SV=1	PREDICTED: protein ECERIFERUM 1 [Vitis vinifera]
Vad18G009840.1	--	--	--	--	Putative uncharacterized protein {ECO:0000313|EMBL:CCB45952.1} OS=Vitis vinifera (Grape) PE=4 SV=1	--
Vad05G003600.1	Biological Process: cellular metabolic process (GO:0044237);; Molecular Function: GDP-mannose 3,5-epimerase activity (GO:0047918);; Molecular Function: coenzyme binding (GO:0050662);;	K10046|0|vvi:100245900|K10046 GDP-D-mannose 3', 5'-epimerase [EC:5.1.3.18 5.1.3.-] | (RefSeq) GDP-mannose 3,5-epimerase 2	[GM]	--	Putative uncharacterized protein {ECO:0000313|EMBL:CCB50485.1} OS=Vitis vinifera (Grape) PE=4 SV=1	PREDICTED: GDP-mannose 3,5-epimerase 2 isoform X1 [Vitis vinifera]
Vad11G005960.1	--	--	[QR]	--	Putative uncharacterized protein {ECO:0000313|EMBL:CCB49916.1} OS=Vitis vinifera (Grape) PE=3 SV=1	PREDICTED: protein SRG1 [Vitis vinifera]
Vad11G009240.1	Molecular Function: DNA-binding transcription factor activity (GO:0003700);; Biological Process: regulation of transcription, DNA-templated (GO:0006355);; Molecular Function: sequence-specific DNA binding (GO:0043565);;	--	--	--	WRKY {ECO:0000313|EMBL:ACY25182.1} OS=Vitis vinifera (Grape) PE=4 SV=1	WRKY [Vitis vinifera]
Vad15G006800.1	Cellular Component: ubiquitin ligase complex (GO:0000151);; Molecular Function: ubiquitin-protein transferase activity (GO:0004842);; Biological Process: protein ubiquitination (GO:0016567);;	--	[S]	Function unknown	Putative uncharacterized protein {ECO:0000313|EMBL:CBI40591.3} OS=Vitis vinifera (Grape) PE=4 SV=1	PREDICTED: U-box domain-containing protein 43-like [Vitis vinifera]
Vad12G001570.1	Molecular Function: protein serine/threonine kinase activity (GO:0004674);; Molecular Function: ATP binding (GO:0005524);; Biological Process: protein phosphorylation (GO:0006468);; Cellular Component: integral component of membrane (GO:0016021);;	--	--	--	Putative uncharacterized protein {ECO:0000313|EMBL:CBI29525.3} OS=Vitis vinifera (Grape) PE=4 SV=1	unnamed protein product [Vitis vinifera]
Vad04G006650.1	Molecular Function: ionotropic glutamate receptor activity (GO:0004970);; Molecular Function: extracellularly glutamate-gated ion channel activity (GO:0005234);; Biological Process: ion transport (GO:0006811);; Cellular Component: integral component of membrane (GO:0016021);; Biological Process: ionotropic glutamate receptor signaling pathway (GO:0035235);;	K05387|0|vvi:100265839|K05387 glutamate receptor, ionotropic, plant | (RefSeq) glutamate receptor 2.7-like	[PET]	--	Glutamate receptor {ECO:0000256|PIRNR:PIRNR037090} OS=Vitis vinifera (Grape) PE=3 SV=1	hypothetical protein VITISV_040422 [Vitis vinifera]
Vad12G006780.1	Biological Process: intracellular protein transport (GO:0006886);; Molecular Function: zinc ion binding (GO:0008270);; Biological Process: positive regulation of cell proliferation (GO:0008284);; Biological Process: gravitropism (GO:0009630);; Biological Process: vesicle-mediated transport (GO:0016192);;	K20181|0|vvi:100254609|K20181 vacuolar protein sorting-associated protein 18 | (RefSeq) vacuolar protein sorting-associated protein 18 homolog	[U]	Intracellular trafficking, secretion, and vesicular transport	Putative uncharacterized protein {ECO:0000313|EMBL:CBI28381.3} OS=Vitis vinifera (Grape) PE=4 SV=1	PREDICTED: vacuolar protein sorting-associated protein 18 homolog [Vitis vinifera]
Vad01G001760.1	Molecular Function: transferase activity (GO:0016740);;	K07393|0|vvi:100268002|K07393 putative glutathione S-transferase | (RefSeq) glutathionyl-hydroquinone reductase YqjG	[O]	Posttranslational modification, protein turnover, chaperones	Putative uncharacterized protein {ECO:0000313|EMBL:CCB51003.1} OS=Vitis vinifera (Grape) PE=4 SV=1	PREDICTED: glutathione S-transferase omega-like 2 [Vitis vinifera]
Vad17G003940.1	Molecular Function: RNA binding (GO:0003723);; Biological Process: posttranscriptional gene silencing by RNA (GO:0035194);; Biological Process: production of small RNA involved in gene silencing by RNA (GO:0070918);;	K13123|0|vvi:100242404|K13123 G patch domain-containing protein 1 | (RefSeq) G patch domain-containing protein TGH	[A]	RNA processing and modification	Putative uncharacterized protein {ECO:0000313|EMBL:CCB43177.1} OS=Vitis vinifera (Grape) PE=4 SV=1	PREDICTED: G patch domain-containing protein 1 [Vitis vinifera]
Vad08G001590.1	--	--	--	--	Putative uncharacterized protein {ECO:0000313|EMBL:CCB48747.1} OS=Vitis vinifera (Grape) PE=4 SV=1	hypothetical protein VITISV_031865 [Vitis vinifera]
Vad02G007980.1	Cellular Component: membrane (GO:0016020);;	--	--	--	Putative uncharacterized protein {ECO:0000313|EMBL:CAN74782.1} OS=Vitis vinifera (Grape) PE=4 SV=1	hypothetical protein VITISV_016425 [Vitis vinifera]
Vad10G006030.1	Molecular Function: nucleic acid binding (GO:0003676);; Molecular Function: zinc ion binding (GO:0008270);; Biological Process: positive regulation of vernalization response (GO:0010220);;	--	--	--	Putative uncharacterized protein {ECO:0000313|EMBL:CBI30597.3} OS=Vitis vinifera (Grape) PE=4 SV=1	PREDICTED: protein FRIGIDA-ESSENTIAL 1 isoform X2 [Vitis vinifera]
Vad15G001780.1	--	K14297|6.59606e-06|egr:104431270|K14297 nuclear pore complex protein Nup98-Nup96 | (RefSeq) nuclear pore complex protein NUP98A-like	--	--	Putative uncharacterized protein {ECO:0000313|EMBL:CBI38082.3} OS=Vitis vinifera (Grape) PE=4 SV=1	unnamed protein product [Vitis vinifera]
Vad17G001010.1	--	--	--	--	Putative uncharacterized protein {ECO:0000313|EMBL:CCB43332.1} OS=Vitis vinifera (Grape) PE=4 SV=1	PREDICTED: gamma carbonic anhydrase-like 2, mitochondrial [Vitis vinifera]
Vad18G012430.1	--	--	--	--	Putative uncharacterized protein {ECO:0000313|EMBL:CBI19965.3} OS=Vitis vinifera (Grape) PE=4 SV=1	PREDICTED: protein trichome berefringence-like 7 isoform X1 [Vitis vinifera]
Vad16G006890.1	Biological Process: intracellular protein transport (GO:0006886);; Molecular Function: protein transporter activity (GO:0008565);; Biological Process: vesicle-mediated transport (GO:0016192);; Cellular Component: membrane coat (GO:0030117);;	K12394|5.86576e-115|vvi:100257590|K12394 AP-1 complex subunit sigma 1/2 | (RefSeq) AP-1 complex subunit sigma-1-like	[U]	Intracellular trafficking, secretion, and vesicular transport	Putative uncharacterized protein {ECO:0000313|EMBL:CAN79566.1} OS=Vitis vinifera (Grape) PE=4 SV=1	PREDICTED: AP-1 complex subunit sigma-1 [Vitis vinifera]
Vad14G002740.1	Cellular Component: extracellular region (GO:0005576);; Molecular Function: manganese ion binding (GO:0030145);; Molecular Function: nutrient reservoir activity (GO:0045735);;	--	--	--	Putative uncharacterized protein {ECO:0000313|EMBL:CCB59918.1} OS=Vitis vinifera (Grape) PE=4 SV=1	hypothetical protein VITISV_005471 [Vitis vinifera]
Vad16G001040.1	--	--	[R]	General function prediction only	Putative uncharacterized protein {ECO:0000313|EMBL:CCB49344.1} OS=Vitis vinifera (Grape) PE=4 SV=1	PREDICTED: receptor-like protein 12 [Vitis vinifera]
Vad14G010610.1	Biological Process: metabolic process (GO:0008152);; Molecular Function: oxidoreductase activity (GO:0016491);;	--	[I]	Lipid transport and metabolism	Putative uncharacterized protein {ECO:0000313|EMBL:CCB62227.1} OS=Vitis vinifera (Grape) PE=4 SV=1	PREDICTED: 4-coumarate--CoA ligase-like 9 [Vitis vinifera]
Vad18G004850.1	Cellular Component: integral component of membrane (GO:0016021);;	--	--	--	Putative uncharacterized protein {ECO:0000313|EMBL:CCB45616.1} OS=Vitis vinifera (Grape) PE=4 SV=1	PREDICTED: purine permease 1 [Vitis vinifera]
Vad10G005330.1	--	--	--	--	Putative uncharacterized protein {ECO:0000313|EMBL:CBI29530.3} OS=Vitis vinifera (Grape) PE=4 SV=1	PREDICTED: uncharacterized protein LOC100263752 [Vitis vinifera]
Vad13G013580.1	Biological Process: defense response (GO:0006952);; Molecular Function: ADP binding (GO:0043531);;	--	[T]	Signal transduction mechanisms	Putative uncharacterized protein {ECO:0000313|EMBL:CCB58626.1} OS=Vitis vinifera (Grape) PE=4 SV=1	PREDICTED: putative disease resistance RPP13-like protein 1 isoform X1 [Vitis vinifera]
Vad16G006660.1	Biological Process: polysaccharide biosynthetic process (GO:0000271);; Cellular Component: vacuole (GO:0005773);; Molecular Function: carbon-monoxide oxygenase activity (GO:0008805);; Cellular Component: chloroplast (GO:0009507);; Biological Process: multidimensional cell growth (GO:0009825);; Biological Process: cell tip growth (GO:0009932);; Biological Process: regulation of hormone levels (GO:…	K08360|2.35193e-158|vvi:100255839|K08360 cytochrome b-561 [EC:1.16.5.1] | (RefSeq) transmembrane ascorbate ferrireductase 1	[C]	Energy production and conversion	Putative uncharacterized protein {ECO:0000313|EMBL:CAN73186.1} OS=Vitis vinifera (Grape) PE=4 SV=1	PREDICTED: transmembrane ascorbate ferrireductase 1 [Vitis vinifera]
Vad04G011790.1	Cellular Component: nucleus (GO:0005634);; Biological Process: regulation of transcription, DNA-templated (GO:0006355);;	K11341|0|vvi:100257470|K11341 YEATS domain-containing protein 4 | (RefSeq) transcription initiation factor TFIID subunit 14b	[K]	Transcription	Putative uncharacterized protein {ECO:0000313|EMBL:CBI17388.3} OS=Vitis vinifera (Grape) PE=4 SV=1	PREDICTED: transcription initiation factor TFIID subunit 14b isoform X1 [Vitis vinifera]
Vad19G006490.1	Molecular Function: nucleotide binding (GO:0000166);; Molecular Function: nucleic acid binding (GO:0003676);;	K14398|0|vvi:100246290|K14398 cleavage and polyadenylation specificity factor subunit 6/7 | (RefSeq) uncharacterized PE-PGRS family protein PE_PGRS54	[R]	General function prediction only	Putative uncharacterized protein {ECO:0000313|EMBL:CCB62006.1} OS=Vitis vinifera (Grape) PE=4 SV=1	PREDICTED: LOW QUALITY PROTEIN: spidroin-1 [Vitis vinifera]
Vad05G003610.1	Biological Process: mitotic recombination (GO:0006312);; Biological Process: embryo sac egg cell differentiation (GO:0009560);; Biological Process: flower development (GO:0009908);; Biological Process: leaf development (GO:0048366);;	--	--	--	Putative uncharacterized protein {ECO:0000313|EMBL:CAN69148.1} OS=Vitis vinifera (Grape) PE=4 SV=1	PREDICTED: armadillo repeat-containing protein LFR [Vitis vinifera]
Vad18G010880.1	Molecular Function: monooxygenase activity (GO:0004497);; Molecular Function: iron ion binding (GO:0005506);; Molecular Function: electron transfer activity (GO:0009055);; Molecular Function: oxidoreductase activity, acting on paired donors, with incorporation or reduction of molecular oxygen (GO:0016705);; Molecular Function: heme binding (GO:0020037);; Biological Process: oxidation-reduction pr…	--	[Q]	Secondary metabolites biosynthesis, transport and catabolism	Putative uncharacterized protein {ECO:0000313|EMBL:CBI19821.3} OS=Vitis vinifera (Grape) PE=3 SV=1	unnamed protein product [Vitis vinifera]
Vad14G008680.1	Cellular Component: extracellular region (GO:0005576);; Biological Process: plant-type cell wall organization (GO:0009664);; Cellular Component: membrane (GO:0016020);;	--	--	--	Putative uncharacterized protein {ECO:0000313|EMBL:CAN62830.1} OS=Vitis vinifera (Grape) PE=3 SV=1	unnamed protein product [Vitis vinifera]
Vad17G006750.1	--	K20929|0|vvi:100253501|K20929 glyoxal/methylglyoxal oxidase [EC:1.2.3.15] | (RefSeq) aldehyde oxidase GLOX	--	--	Putative uncharacterized protein {ECO:0000313|EMBL:CCB42922.1} OS=Vitis vinifera (Grape) PE=4 SV=1	PREDICTED: uncharacterized protein LOC100253501 [Vitis vinifera]
Vad14G008200.1	Molecular Function: protein serine/threonine kinase activity (GO:0004674);; Molecular Function: ATP binding (GO:0005524);; Biological Process: protein phosphorylation (GO:0006468);;	--	[T]	Signal transduction mechanisms	Putative uncharacterized protein {ECO:0000313|EMBL:CCB46912.1} OS=Vitis vinifera (Grape) PE=3 SV=1	PREDICTED: receptor-like protein kinase FERONIA [Vitis vinifera]
Vad18G018830.1	Molecular Function: purine ribonucleoside binding (GO:0032550);; Molecular Function: adenyl ribonucleotide binding (GO:0032559);; Molecular Function: anion binding (GO:0043168);; Biological Process: response to stimulus (GO:0050896);;	--	--	--	Putative uncharacterized protein {ECO:0000313|EMBL:CCB61644.1} OS=Vitis vinifera (Grape) PE=4 SV=1	unnamed protein product [Vitis vinifera]
Vad15G004370.1	Biological Process: carbohydrate metabolic process (GO:0005975);; Molecular Function: racemase and epimerase activity, acting on carbohydrates and derivatives (GO:0016857);; Biological Process: cellular metabolic process (GO:0044237);; Molecular Function: coenzyme binding (GO:0050662);;	K08679|0|vvi:100242036|K08679 UDP-glucuronate 4-epimerase [EC:5.1.3.6] | (RefSeq) UDP-glucuronate 4-epimerase 3-like	[M]	Cell wall/membrane/envelope biogenesis	Putative uncharacterized protein {ECO:0000313|EMBL:CCB61418.1} OS=Vitis vinifera (Grape) PE=4 SV=1	PREDICTED: UDP-glucuronate 4-epimerase 3-like [Vitis vinifera]
Vad12G008560.1	--	--	[T]	Signal transduction mechanisms	Putative uncharacterized protein {ECO:0000313|EMBL:CCB62629.1} OS=Vitis vinifera (Grape) PE=4 SV=1	PREDICTED: protein BONZAI 3-like isoform X2 [Vitis vinifera]
Vad10G000050.1	Molecular Function: protein serine/threonine kinase activity (GO:0004674);; Molecular Function: ATP binding (GO:0005524);; Biological Process: protein phosphorylation (GO:0006468);;	K04733|1.77313e-29|vra:106771830|K04733 interleukin-1 receptor-associated kinase 4 [EC:2.7.11.1] | (RefSeq) cysteine-rich receptor-like protein kinase 10	--	--	Putative uncharacterized protein {ECO:0000313|EMBL:CCB48155.1} OS=Vitis vinifera (Grape) PE=4 SV=1	PREDICTED: cysteine-rich receptor-like protein kinase 29-like [Fragaria vesca subsp. vesca]
Vad18G017000.1	Molecular Function: magnesium ion binding (GO:0000287);; Biological Process: metabolic process (GO:0008152);; Molecular Function: terpene synthase activity (GO:0010333);;	--	--	--	Putative uncharacterized protein {ECO:0000313|EMBL:CBI31301.3} OS=Vitis vinifera (Grape) PE=4 SV=1	PREDICTED: valencene synthase [Vitis vinifera]
Vad09G006580.1	--	--	--	--	Putative uncharacterized protein {ECO:0000313|EMBL:CBI36412.3} OS=Vitis vinifera (Grape) PE=4 SV=1	PREDICTED: triphosphate tunel metalloenzyme 3 [Vitis vinifera]
Vad04G009380.1	--	K14488|1.7112e-50|vvi:100259796|K14488 SAUR family protein | (RefSeq) auxin-responsive protein SAUR23-like	--	--	Putative uncharacterized protein {ECO:0000313|EMBL:CBI17631.3} OS=Vitis vinifera (Grape) PE=4 SV=1	PREDICTED: auxin-induced protein 15A-like [Vitis vinifera]
Vad05G007790.1	Biological Process: defense response (GO:0006952);; Molecular Function: ADP binding (GO:0043531);;	--	--	--	Putative uncharacterized protein {ECO:0000313|EMBL:CBI17246.3} OS=Vitis vinifera (Grape) PE=4 SV=1	unnamed protein product [Vitis vinifera]
Vad13G002480.1	--	--	--	--	Putative uncharacterized protein {ECO:0000313|EMBL:CBI33166.3} OS=Vitis vinifera (Grape) PE=4 SV=1	PREDICTED: uncharacterized protein LOC100267224 [Vitis vinifera]
Vad05G008110.1	--	K03363|9.06264e-180|vvi:100247018|K03363 cell division cycle 20, cofactor of APC complex | (RefSeq) cell division cycle 20.2, cofactor of APC complex	[DO]	--	Putative uncharacterized protein {ECO:0000313|EMBL:CBI17229.3} OS=Vitis vinifera (Grape) PE=4 SV=1	unnamed protein product [Vitis vinifera]
Vad17G003360.1	Biological Process: lipid transport (GO:0006869);; Molecular Function: lipid binding (GO:0008289);; Cellular Component: anchored component of membrane (GO:0031225);;	--	--	--	Putative uncharacterized protein {ECO:0000313|EMBL:CBI15442.3} OS=Vitis vinifera (Grape) PE=4 SV=1	unnamed protein product [Vitis vinifera]
Vad03G008950.1	--	--	--	--	Putative uncharacterized protein {ECO:0000313|EMBL:CBI35424.3} OS=Vitis vinifera (Grape) PE=4 SV=1	unnamed protein product [Vitis vinifera]
Vad06G007410.1	Cellular Component: outer membrane (GO:0019867);;	--	--	--	Putative uncharacterized protein {ECO:0000313|EMBL:CBI24437.3} OS=Vitis vinifera (Grape) PE=4 SV=1	PREDICTED: outer envelope protein 80, chloroplastic [Vitis vinifera]
Vad05G007850.1	Molecular Function: alpha,alpha-trehalose-phosphate synthase (UDP-forming) activity (GO:0003825);; Molecular Function: trehalose-phosphatase activity (GO:0004805);; Biological Process: trehalose biosynthetic process (GO:0005992);;	K16055|1.35447e-55|vvi:100251811|K16055 trehalose 6-phosphate synthase/phosphatase [EC:2.4.1.15 3.1.3.12] | (RefSeq) probable alpha,alpha-trehalose-phosphate synthase [UDP-forming] 9	[G]	Carbohydrate transport and metabolism	Putative uncharacterized protein {ECO:0000313|EMBL:CCB47623.1} OS=Vitis vinifera (Grape) PE=4 SV=1	hypothetical protein VITISV_012551 [Vitis vinifera]
Vad10G009750.1	Molecular Function: nucleotide binding (GO:0000166);; Biological Process: cation transport (GO:0006812);; Cellular Component: integral component of membrane (GO:0016021);; Molecular Function: cation-transporting ATPase activity (GO:0019829);; Molecular Function: metal ion binding (GO:0046872);;	--	--	--	Putative uncharacterized protein {ECO:0000313|EMBL:CCB51841.1} OS=Vitis vinifera (Grape) PE=4 SV=1	unnamed protein product [Vitis vinifera]
Vad07G014930.1	--	--	--	--	Putative uncharacterized protein {ECO:0000313|EMBL:CCB57432.1} OS=Vitis vinifera (Grape) PE=4 SV=1	PREDICTED: uncharacterized protein LOC100855167 [Vitis vinifera]
Vad16G001700.1	--	--	[R]	General function prediction only	Putative uncharacterized protein {ECO:0000313|EMBL:CCB50621.1} OS=Vitis vinifera (Grape) PE=4 SV=1	PREDICTED: pentatricopeptide repeat-containing protein At5g42310, mitochondrial-like [Vitis vinifera]
Vad13G008020.1	--	--	--	--	Putative uncharacterized protein {ECO:0000313|EMBL:CCB52149.1} OS=Vitis vinifera (Grape) PE=4 SV=1	--
Vad18G018460.1	Molecular Function: ATP binding (GO:0005524);;	--	[T]	Signal transduction mechanisms	Putative uncharacterized protein {ECO:0000313|EMBL:CBI39230.3} OS=Vitis vinifera (Grape) PE=4 SV=1	unnamed protein product [Vitis vinifera]
Vad03G001070.1	--	K13457|0|vvi:100246924|K13457 disease resistance protein RPM1 | (RefSeq) putative disease resistance protein At1g50180	[T]	Signal transduction mechanisms	Putative uncharacterized protein {ECO:0000313|EMBL:CCB60669.1} OS=Vitis vinifera (Grape) PE=4 SV=1	PREDICTED: probable disease resistance RPP8-like protein 2 [Vitis vinifera]
Vad03G008340.1	Cellular Component: extracellular region (GO:0005576);;	K13449|2.80916e-116|vvi:100263556|K13449 pathogenesis-related protein 1 | (RefSeq) basic form of pathogenesis-related protein 1	[S]	Function unknown	Putative uncharacterized protein {ECO:0000313|EMBL:CAN74267.1} OS=Vitis vinifera (Grape) PE=4 SV=1	PREDICTED: basic form of pathogenesis-related protein 1 [Vitis vinifera]
Vad09G005320.1	Molecular Function: monooxygenase activity (GO:0004497);; Molecular Function: iron ion binding (GO:0005506);; Biological Process: cellular amino acid metabolic process (GO:0006520);; Molecular Function: electron transfer activity (GO:0009055);; Cellular Component: chloroplast (GO:0009507);; Molecular Function: oxidoreductase activity, acting on paired donors, with incorporation or reduction of mo…	--	--	--	Putative uncharacterized protein {ECO:0000313|EMBL:CAN68957.1} OS=Vitis vinifera (Grape) PE=4 SV=1	hypothetical protein VITISV_015733 [Vitis vinifera]
Vad05G010380.1	--	--	--	--	Putative uncharacterized protein {ECO:0000313|EMBL:CCB59826.1} OS=Vitis vinifera (Grape) PE=4 SV=1	PREDICTED: uncharacterized protein LOC104879453 isoform X2 [Vitis vinifera]
Vad12G009670.1	Cellular Component: plasma membrane (GO:0005886);; Biological Process: pollen development (GO:0009555);; Biological Process: embryo development ending in seed dormancy (GO:0009793);; Biological Process: hydrogen peroxide catabolic process (GO:0042744);;	--	--	--	Putative uncharacterized protein {ECO:0000313|EMBL:CAN70246.1} OS=Vitis vinifera (Grape) PE=4 SV=1	PREDICTED: uncharacterized protein LOC100261813 [Vitis vinifera]
Vad18G017100.1	Molecular Function: magnesium ion binding (GO:0000287);; Cellular Component: cytoplasm (GO:0005737);; Molecular Function: terpene synthase activity (GO:0010333);; Biological Process: terpenoid biosynthetic process (GO:0016114);;	--	--	--	Putative uncharacterized protein {ECO:0000313|EMBL:CCB56053.1} OS=Vitis vinifera (Grape) PE=4 SV=1	unnamed protein product [Vitis vinifera]
Vad05G005690.1	Cellular Component: ubiquitin ligase complex (GO:0000151);; Molecular Function: ubiquitin-protein transferase activity (GO:0004842);; Cellular Component: cell wall (GO:0005618);; Cellular Component: nucleolus (GO:0005730);; Cellular Component: chloroplast (GO:0009507);; Biological Process: protein ubiquitination (GO:0016567);; Biological Process: defense response to bacterium (GO:0042742);; Biolo…	K10599|0|vvi:100249408|K10599 pre-mRNA-processing factor 19 [EC:2.3.2.27] | (RefSeq) pre-mRNA-processing factor 19	[R]	General function prediction only	Putative uncharacterized protein {ECO:0000313|EMBL:CBI23714.3} OS=Vitis vinifera (Grape) PE=4 SV=1	PREDICTED: pre-mRNA-processing factor 19 [Vitis vinifera]
Vad0G008660.1	--	K00281|4.12312e-58|tcc:TCM_037284|K00281 glycine dehydrogenase [EC:1.4.4.2] | (RefSeq) Glycine decarboxylase P-protein 1	[E]	Amino acid transport and metabolism	Predicted protein {ECO:0000313|EMBL:BAJ87545.1} OS=Hordeum vulgare var. distichum (Domesticated barley) PE=2 SV=1	predicted protein [Hordeum vulgare subsp. vulgare]
Vad07G015800.1	Molecular Function: oxidoreductase activity (GO:0016491);; Biological Process: oxidation-reduction process (GO:0055114);;	--	[R]	General function prediction only	Putative uncharacterized protein {ECO:0000313|EMBL:CCB57798.1} OS=Vitis vinifera (Grape) PE=4 SV=1	PREDICTED: putative oxidoreductase C1F5.03c [Vitis vinifera]
Vad04G002030.1	--	--	--	--	Putative uncharacterized protein {ECO:0000313|EMBL:CCB46632.1} OS=Vitis vinifera (Grape) PE=4 SV=1	PREDICTED: uncharacterized protein LOC100257842 isoform X2 [Vitis vinifera]
Vad19G009780.1	--	--	--	--	Putative uncharacterized protein {ECO:0000313|EMBL:CBI33539.3} OS=Vitis vinifera (Grape) PE=4 SV=1	unnamed protein product [Vitis vinifera]
Vad01G006010.1	Molecular Function: DNA binding (GO:0003677);; Molecular Function: DNA-binding transcription factor activity (GO:0003700);; Biological Process: regulation of transcription, DNA-templated (GO:0006355);;	--	--	--	Putative uncharacterized protein {ECO:0000313|EMBL:CAN69254.1} OS=Vitis vinifera (Grape) PE=4 SV=1	PREDICTED: zinc-finger homeodomain protein 9 [Vitis vinifera]
Vad0G029410.1	Biological Process: cellular amino acid biosynthetic process (GO:0008652);; Molecular Function: oxidoreductase activity, acting on the CH-OH group of donors, NAD or NADP as acceptor (GO:0016616);;	K00053|5.347e-30|vcn:VOLCADRAFT_74529|K00053 ketol-acid reductoisomerase [EC:1.1.1.86] | (RefSeq) hypothetical protein	--	--	Putative uncharacterized protein {ECO:0000313|EMBL:EGB08261.1} OS=Aureococcus anophagefferens (Harmful bloom alga) PE=4 SV=1	Acetohydroxy acid isomeroreductase [Paulinella chromatophora]
Vad06G005840.1	Molecular Function: zinc ion transmembrane transporter activity (GO:0005385);; Cellular Component: integral component of membrane (GO:0016021);; Biological Process: zinc ion transmembrane transport (GO:0071577);;	K14709|0|vvi:100250102|K14709 solute carrier family 39 (zinc transporter), member 1/2/3 | (RefSeq) zinc transporter 6, chloroplastic	[P]	Inorganic ion transport and metabolism	Putative uncharacterized protein {ECO:0000313|EMBL:CBI15921.3} OS=Vitis vinifera (Grape) PE=4 SV=1	PREDICTED: zinc transporter 6, chloroplastic [Vitis vinifera]
Vad16G009590.1	Molecular Function: transcription regulatory region sequence-specific DNA binding (GO:0000976);; Molecular Function: DNA-binding transcription factor activity (GO:0003700);; Cellular Component: nucleus (GO:0005634);; Biological Process: regulation of transcription, DNA-templated (GO:0006355);;	K09338|6.77773e-161|vvi:100252202|K09338 homeobox-leucine zipper protein | (RefSeq) homeobox-leucine zipper protein ATHB-12	[K]	Transcription	Putative uncharacterized protein {ECO:0000313|EMBL:CBI23065.3} OS=Vitis vinifera (Grape) PE=4 SV=1	PREDICTED: homeobox-leucine zipper protein ATHB-12 [Vitis vinifera]
Vad0G020770.1	Molecular Function: RNA binding (GO:0003723);; Molecular Function: RNA-directed DNA polymerase activity (GO:0003964);; Biological Process: RNA-dependent DNA biosynthetic process (GO:0006278);; Molecular Function: zinc ion binding (GO:0008270);; Biological Process: DNA integration (GO:0015074);;	--	--	--	Putative uncharacterized protein {ECO:0000313|EMBL:CCB57263.1} OS=Vitis vinifera (Grape) PE=4 SV=1	hypothetical protein VITISV_001649 [Vitis vinifera]
Vad07G014620.1	Molecular Function: ATP binding (GO:0005524);; Cellular Component: nucleus (GO:0005634);; Biological Process: regulation of transcription, DNA-templated (GO:0006355);; Molecular Function: hydrolase activity, acting on acid anhydrides, in phosphorus-containing anhydrides (GO:0016818);;	--	--	--	Putative uncharacterized protein {ECO:0000313|EMBL:CCB57297.1} OS=Vitis vinifera (Grape) PE=4 SV=1	PREDICTED: growth-regulating factor 1-like [Vitis vinifera]
Vad08G014480.1	--	K20102|0|vvi:100245287|K20102 YTH domain-containing family protein | (RefSeq) uncharacterized LOC100245287	[R]	General function prediction only	Putative uncharacterized protein {ECO:0000313|EMBL:CBI29937.3} OS=Vitis vinifera (Grape) PE=4 SV=1	PREDICTED: uncharacterized protein LOC100245287 isoform X2 [Vitis vinifera]
Vad16G004990.1	Molecular Function: nucleotide binding (GO:0000166);;	--	[J]	Translation, ribosomal structure and biogenesis	Putative uncharacterized protein {ECO:0000313|EMBL:CCB49257.1} OS=Vitis vinifera (Grape) PE=3 SV=1	PREDICTED: uncharacterized protein LOC100251571 isoform X1 [Vitis vinifera]
Vad18G011530.1	--	--	[Z]	Cytoskeleton	Putative uncharacterized protein {ECO:0000313|EMBL:CBI19881.3} OS=Vitis vinifera (Grape) PE=4 SV=1	PREDICTED: uncharacterized protein LOC100248885 isoform X1 [Vitis vinifera]
Vad17G003770.1	Biological Process: protein peptidyl-prolyl isomerization (GO:0000413);; Molecular Function: peptidyl-prolyl cis-trans isomerase activity (GO:0003755);; Biological Process: protein folding (GO:0006457);; Cellular Component: chloroplast thylakoid lumen (GO:0009543);; Biological Process: mRNA modification (GO:0016556);; Biological Process: isopentenyl diphosphate biosynthetic process, methylerythri…	K03768|0|vvi:100254249|K03768 peptidyl-prolyl cis-trans isomerase B (cyclophilin B) [EC:5.2.1.8] | (RefSeq) peptidyl-prolyl cis-trans isomerase CYP26-2, chloroplastic	[O]	Posttranslational modification, protein turnover, chaperones	Putative uncharacterized protein {ECO:0000313|EMBL:CBI15402.3} OS=Vitis vinifera (Grape) PE=4 SV=1	PREDICTED: peptidyl-prolyl cis-trans isomerase CYP26-2, chloroplastic [Vitis vinifera]
Vad14G007210.1	--	--	--	--	Putative uncharacterized protein {ECO:0000313|EMBL:CBI16865.3} OS=Vitis vinifera (Grape) PE=4 SV=1	unnamed protein product [Vitis vinifera]
Vad06G008200.1	Molecular Function: methyltransferase activity (GO:0008168);; Biological Process: methylation (GO:0032259);;	--	[R]	General function prediction only	Putative uncharacterized protein {ECO:0000313|EMBL:CAN66807.1} OS=Vitis vinifera (Grape) PE=4 SV=1	hypothetical protein VITISV_041910 [Vitis vinifera]
Vad11G007330.1	--	--	--	--	Putative uncharacterized protein {ECO:0000313|EMBL:CBI36533.3} OS=Vitis vinifera (Grape) PE=4 SV=1	unnamed protein product [Vitis vinifera]
Vad18G008530.1	Molecular Function: heme oxygenase (decyclizing) activity (GO:0004392);; Biological Process: heme oxidation (GO:0006788);; Biological Process: phytochromobilin biosynthetic process (GO:0010024);; Biological Process: isopentenyl diphosphate biosynthetic process, methylerythritol 4-phosphate pathway (GO:0019288);;	K00510|0|vvi:100262471|K00510 heme oxygenase (biliverdin-producing) [EC:1.14.14.18] | (RefSeq) probable inactive heme oxygenase 2, chloroplastic	[P]	Inorganic ion transport and metabolism	Putative uncharacterized protein {ECO:0000313|EMBL:CBI19563.3} OS=Vitis vinifera (Grape) PE=4 SV=1	PREDICTED: probable inactive heme oxygenase 2, chloroplastic [Vitis vinifera]
Vad06G000980.1	--	--	--	--	Putative uncharacterized protein {ECO:0000313|EMBL:CCB43783.1} OS=Vitis vinifera (Grape) PE=4 SV=1	PREDICTED: dirigent protein 22 [Vitis vinifera]
Vad18G003190.1	Biological Process: polysaccharide biosynthetic process (GO:0000271);; Biological Process: amino acid transmembrane transport (GO:0003333);; Biological Process: acetyl-CoA metabolic process (GO:0006084);; Biological Process: response to auxin (GO:0009733);; Biological Process: multidimensional cell growth (GO:0009825);; Biological Process: auxin polar transport (GO:0009926);; Biological Process: …	K13946|0|vvi:100243769|K13946 auxin influx carrier (AUX1 LAX family) | (RefSeq) auxin transporter-like protein 3	[E]	Amino acid transport and metabolism	Putative uncharacterized protein {ECO:0000313|EMBL:CBI19062.3} OS=Vitis vinifera (Grape) PE=4 SV=1	PREDICTED: auxin transporter-like protein 3 [Vitis vinifera]
Vad07G006120.1	--	K10727|0|vvi:100263560|K10727 chromatin licensing and DNA replication factor 1 | (RefSeq) CDT1-like protein a, chloroplastic	[L]	Replication, recombination and repair	Putative uncharacterized protein {ECO:0000313|EMBL:CCB60094.1} OS=Vitis vinifera (Grape) PE=4 SV=1	PREDICTED: CDT1-like protein a, chloroplastic [Vitis vinifera]
Vad08G003240.1	--	--	[R]	General function prediction only	Putative uncharacterized protein {ECO:0000313|EMBL:CAN76702.1} OS=Vitis vinifera (Grape) PE=4 SV=1	PREDICTED: receptor-like protein 12 [Vitis vinifera]
Vad03G006190.1	Cellular Component: chloroplast (GO:0009507);; Biological Process: chloroplast organization (GO:0009658);;	--	[RV]	--	Putative uncharacterized protein {ECO:0000313|EMBL:CBI32399.3} OS=Vitis vinifera (Grape) PE=4 SV=1	PREDICTED: protein DJ-1 homolog C [Vitis vinifera]
Vad13G004850.1	Molecular Function: anthranilate N-benzoyltransferase activity (GO:0047672);;	--	--	--	Putative uncharacterized protein {ECO:0000313|EMBL:CCB56234.1} OS=Vitis vinifera (Grape) PE=4 SV=1	PREDICTED: uncharacterized acetyltransferase At3g50280 [Vitis vinifera]
Vad02G006520.1	Molecular Function: GTP binding (GO:0005525);; Cellular Component: vacuole (GO:0005773);; Cellular Component: plasma membrane (GO:0005886);; Biological Process: small GTPase mediated signal transduction (GO:0007264);; Biological Process: protein transport (GO:0015031);; Molecular Function: hydrolase activity (GO:0016787);;	K07874|3.34028e-151|vvi:100248422|K07874 Ras-related protein Rab-1A | (RefSeq) GTP-binding protein YPTM2	[TU]	--	GTP-binding family protein {ECO:0000313|EMBL:EEE79284.1} OS=Populus trichocarpa (Western balsam poplar) PE=2 SV=1	PREDICTED: GTP-binding protein YPTM2 [Vitis vinifera]
Vad19G006820.1	Molecular Function: RNA binding (GO:0003723);; Biological Process: rRNA processing (GO:0006364);; Molecular Function: S-adenosylmethionine-dependent methyltransferase activity (GO:0008757);; Biological Process: methylation (GO:0032259);; Biological Process: transmembrane transport (GO:0055085);;	K14835|9.01837e-172|vvi:100265196|K14835 ribosomal RNA methyltransferase Nop2 [EC:2.1.1.-] | (RefSeq) probable 28S rRNA (cytosine(4447)-C(5))-methyltransferase	[A]	RNA processing and modification	Putative uncharacterized protein {ECO:0000313|EMBL:CCB62028.1} OS=Vitis vinifera (Grape) PE=4 SV=1	PREDICTED: probable 28S rRNA (cytosine(4447)-C(5))-methyltransferase isoform X2 [Vitis vinifera]
Vad18G010650.1	--	--	--	--	Putative uncharacterized protein {ECO:0000313|EMBL:CCB45998.1} OS=Vitis vinifera (Grape) PE=4 SV=1	Uncharacterized protein TCM_034154 [Theobroma cacao]
Vad17G006770.1	Molecular Function: nucleotide binding (GO:0000166);; Molecular Function: nucleic acid binding (GO:0003676);; Molecular Function: catalytic activity (GO:0003824);; Biological Process: metabolic process (GO:0008152);;	--	--	--	Putative uncharacterized protein {ECO:0000313|EMBL:CBI14911.3} OS=Vitis vinifera (Grape) PE=4 SV=1	PREDICTED: probable galactinol--sucrose galactosyltransferase 2 isoform X1 [Vitis vinifera]
Vad0G007500.1	--	--	--	--	--	hypothetical protein SMAC_11699 [Sordaria macrospora k-hell]
Vad02G006750.1	--	--	[R]	General function prediction only	Putative uncharacterized protein {ECO:0000313|EMBL:CCB62813.1} OS=Vitis vinifera (Grape) PE=4 SV=1	PREDICTED: ankyrin repeat-containing protein At3g12360-like [Vitis vinifera]
Vad06G006870.1	Molecular Function: nucleotide binding (GO:0000166);; Cellular Component: cytoplasm (GO:0005737);; Molecular Function: aminoacyl-tRNA ligase activity (GO:0016876);; Biological Process: tRNA aminoacylation (GO:0043039);; Molecular Function: ion binding (GO:0043167);;	K01872|5.28997e-10|vvi:100251111|K01872 alanyl-tRNA synthetase [EC:6.1.1.7] | (RefSeq) alanine--tRNA ligase	[J]	Translation, ribosomal structure and biogenesis	Putative uncharacterized protein {ECO:0000313|EMBL:CBI34061.3} OS=Vitis vinifera (Grape) PE=4 SV=1	unnamed protein product [Vitis vinifera]
Vad13G013430.1	Molecular Function: DNA binding (GO:0003677);; Molecular Function: chromatin binding (GO:0003682);;	K09422|0|vvi:100260951|K09422 myb proto-oncogene protein, plant | (RefSeq) transcription repressor MYB6	[K]	Transcription	Putative uncharacterized protein {ECO:0000313|EMBL:CBI35094.3} OS=Vitis vinifera (Grape) PE=4 SV=1	PREDICTED: transcription repressor MYB6 [Vitis vinifera]
Vad18G011850.1	Biological Process: cobalt ion transport (GO:0006824);; Molecular Function: cobalt ion transmembrane transporter activity (GO:0015087);; Molecular Function: nickel cation transmembrane transporter activity (GO:0015099);; Cellular Component: integral component of membrane (GO:0016021);; Biological Process: nickel cation transmembrane transport (GO:0035444);; Molecular Function: metal ion binding (…	--	--	--	Putative uncharacterized protein {ECO:0000313|EMBL:CCB46067.1} OS=Vitis vinifera (Grape) PE=4 SV=1	PREDICTED: uncharacterized protein LOC100255788 [Vitis vinifera]
Vad03G005940.1	Molecular Function: DNA binding (GO:0003677);; Cellular Component: nucleus (GO:0005634);; Biological Process: regulation of transcription, DNA-templated (GO:0006355);;	--	--	--	Putative uncharacterized protein {ECO:0000313|EMBL:CBI32429.3} OS=Vitis vinifera (Grape) PE=4 SV=1	unnamed protein product [Vitis vinifera]
Vad07G002690.1	Cellular Component: nucleus (GO:0005634);; Molecular Function: zinc ion binding (GO:0008270);; Biological Process: virus induced gene silencing (GO:0009616);; Biological Process: vegetative phase change (GO:0010050);;	K10144|0|vvi:100264899|K10144 RING finger and CHY zinc finger domain-containing protein 1 [EC:2.3.2.27] | (RefSeq) E3 ubiquitin-protein ligase MIEL1	[R]	General function prediction only	Putative uncharacterized protein {ECO:0000313|EMBL:CBI32260.3} OS=Vitis vinifera (Grape) PE=4 SV=1	PREDICTED: RING finger and CHY zinc finger domain-containing protein 1 [Vitis vinifera]
Vad12G000710.1	--	--	--	--	Putative uncharacterized protein {ECO:0000313|EMBL:CBI22088.3} OS=Vitis vinifera (Grape) PE=4 SV=1	unnamed protein product [Vitis vinifera]
Vad17G000390.1	Biological Process: transport (GO:0006810);; Cellular Component: integral component of membrane (GO:0016021);;	K15102|0|vvi:100261124|K15102 solute carrier family 25 (mitochondrial phosphate transporter), member 3 | (RefSeq) phosphate carrier protein, mitochondrial-like	[C]	Energy production and conversion	Putative uncharacterized protein {ECO:0000313|EMBL:CAN81559.1} OS=Vitis vinifera (Grape) PE=3 SV=1	PREDICTED: mitochondrial phosphate carrier protein 3, mitochondrial [Vitis vinifera]
Vad12G000900.1	Cellular Component: mitochondrion (GO:0005739);; Cellular Component: endoplasmic reticulum (GO:0005783);; Biological Process: protein targeting to membrane (GO:0006612);; Biological Process: positive regulation of flavonoid biosynthetic process (GO:0009963);; Biological Process: regulation of plant-type hypersensitive response (GO:0010363);;	--	[U]	Intracellular trafficking, secretion, and vesicular transport	Reticulon-like protein {ECO:0000256|RuleBase:RU210713} OS=Vitis vinifera (Grape) PE=4 SV=1	PREDICTED: reticulon-like protein B8 [Vitis vinifera]
Vad02G008060.1	Molecular Function: 2-alkenal reductase [NAD(P)] activity (GO:0032440);; Molecular Function: protein dimerization activity (GO:0046983);; Biological Process: oxidation-reduction process (GO:0055114);;	K13422|0|vvi:100250607|K13422 transcription factor MYC2 | (RefSeq) transcription factor MYC2	--	--	Putative uncharacterized protein {ECO:0000313|EMBL:CCB57900.1} OS=Vitis vinifera (Grape) PE=4 SV=1	PREDICTED: transcription factor MYC2-like [Vitis vinifera]
Vad12G004640.1	Molecular Function: metal ion binding (GO:0046872);;	--	[R]	General function prediction only	Putative uncharacterized protein {ECO:0000313|EMBL:CBI28871.3} OS=Vitis vinifera (Grape) PE=4 SV=1	PREDICTED: zinc finger CCCH domain-containing protein 3 [Vitis vinifera]
Vad11G003640.1	Molecular Function: ubiquitin-protein transferase activity (GO:0004842);; Biological Process: protein ubiquitination (GO:0016567);;	K13960|9.24013e-125|vvi:100245756|K13960 ubiquitin-conjugating enzyme E2 T [EC:2.3.2.23] | (RefSeq) uncharacterized LOC100245756	[O]	Posttranslational modification, protein turnover, chaperones	Putative uncharacterized protein {ECO:0000313|EMBL:CBI28077.3} OS=Vitis vinifera (Grape) PE=3 SV=1	unnamed protein product [Vitis vinifera]
Vad12G003390.1	--	--	[R]	General function prediction only	Putative uncharacterized protein {ECO:0000313|EMBL:CCB47259.1} OS=Vitis vinifera (Grape) PE=4 SV=1	PREDICTED: ankyrin repeat-containing protein At3g12360 [Vitis vinifera]
Vad10G014300.1	--	--	--	--	Putative uncharacterized protein {ECO:0000313|EMBL:CCB61008.1} OS=Vitis vinifera (Grape) PE=4 SV=1	hypothetical protein VITISV_008510 [Vitis vinifera]
Vad02G009490.1	--	--	--	--	Putative uncharacterized protein {ECO:0000313|EMBL:CBI37454.3} OS=Vitis vinifera (Grape) PE=4 SV=1	PREDICTED: uncharacterized protein At2g24330 [Vitis vinifera]
Vad11G005100.1	Molecular Function: nucleoside transmembrane transporter activity (GO:0005337);; Biological Process: transport (GO:0006810);; Cellular Component: integral component of membrane (GO:0016021);;	K15014|0|vvi:100243980|K15014 solute carrier family 29 (equilibrative nucleoside transporter), member 1/2/3 | (RefSeq) equilibrative nucleotide transporter 8	[F]	Nucleotide transport and metabolism	Putative uncharacterized protein {ECO:0000313|EMBL:CCB51593.1} OS=Vitis vinifera (Grape) PE=4 SV=1	PREDICTED: equilibrative nucleotide transporter 8 [Vitis vinifera]
Vad03G008770.1	--	--	--	--	Putative uncharacterized protein {ECO:0000313|EMBL:CCB58924.1} OS=Vitis vinifera (Grape) PE=4 SV=1	PREDICTED: uncharacterized protein LOC100254138 [Vitis vinifera]
Vad02G008600.1	--	--	--	--	Putative uncharacterized protein {ECO:0000313|EMBL:CAN79460.1} OS=Vitis vinifera (Grape) PE=4 SV=1	hypothetical protein VITISV_022546 [Vitis vinifera]
Vad08G006250.1	--	--	--	--	Putative uncharacterized protein {ECO:0000313|EMBL:CAN62433.1} OS=Vitis vinifera (Grape) PE=4 SV=1	hypothetical protein VITISV_022135 [Vitis vinifera]
Vad04G001720.1	--	K15082|0|vvi:100252702|K15082 DNA repair protein RAD7 | (RefSeq) uncharacterized LOC100252702	--	--	Putative uncharacterized protein {ECO:0000313|EMBL:CCB46610.1} OS=Vitis vinifera (Grape) PE=4 SV=1	PREDICTED: uncharacterized protein LOC100252702 [Vitis vinifera]
Vad03G007480.1	Molecular Function: hydrolase activity, hydrolyzing O-glycosyl compounds (GO:0004553);; Biological Process: carbohydrate metabolic process (GO:0005975);;	--	--	--	Putative uncharacterized protein {ECO:0000313|EMBL:CBI22449.3} OS=Vitis vinifera (Grape) PE=4 SV=1	unnamed protein product [Vitis vinifera]
Vad03G001450.1	Molecular Function: carbon-nitrogen ligase activity, with glutamine as amido-N-donor (GO:0016884);;	K01426|0|vvi:100250374|K01426 amidase [EC:3.5.1.4] | (RefSeq) putative amidase C869.01	[J]	Translation, ribosomal structure and biogenesis	Putative uncharacterized protein {ECO:0000313|EMBL:CCB60637.1} OS=Vitis vinifera (Grape) PE=4 SV=1	PREDICTED: putative amidase C869.01 [Vitis vinifera]
Vad02G002190.1	--	--	[K]	Transcription	Putative uncharacterized protein {ECO:0000313|EMBL:CCB58286.1} OS=Vitis vinifera (Grape) PE=4 SV=1	PREDICTED: MADS-box transcription factor 31-like [Vitis vinifera]
Vad01G008740.1	--	--	--	--	Putative uncharacterized protein {ECO:0000313|EMBL:CCB56391.1} OS=Vitis vinifera (Grape) PE=4 SV=1	PREDICTED: uncharacterized protein LOC104881629 [Vitis vinifera]
Vad0G020080.1	--	--	--	--	Putative uncharacterized protein {ECO:0000313|EMBL:CCB62626.1} OS=Vitis vinifera (Grape) PE=4 SV=1	hypothetical protein VITISV_025019 [Vitis vinifera]
Vad01G012680.1	Cellular Component: integral component of membrane (GO:0016021);;	--	[E]	Amino acid transport and metabolism	Putative uncharacterized protein {ECO:0000313|EMBL:CCB51240.1} OS=Vitis vinifera (Grape) PE=4 SV=1	unnamed protein product [Vitis vinifera]
Vad03G004440.1	--	--	--	--	Putative uncharacterized protein {ECO:0000313|EMBL:CAN67243.1} OS=Vitis vinifera (Grape) PE=4 SV=1	PREDICTED: organ-specific protein P4-like [Vitis vinifera]
Vad13G001660.1	Biological Process: anthocyanin-containing compound biosynthetic process (GO:0009718);; Biological Process: response to sucrose (GO:0009744);; Biological Process: response to UV-B (GO:0010224);; Biological Process: cellular modified amino acid biosynthetic process (GO:0042398);; Molecular Function: chalcone isomerase activity (GO:0045430);; Biological Process: response to karrikin (GO:0080167);;	--	--	--	Chalcone-flavonone isomerase family protein {ECO:0000256|RuleBase:RU361158} OS=Vitis vinifera (Grape) PE=3 SV=1	unnamed protein product [Vitis vinifera]
Vad15G005010.1	Molecular Function: phosphorelay response regulator activity (GO:0000156);; Biological Process: phosphorelay signal transduction system (GO:0000160);; Molecular Function: DNA binding (GO:0003677);; Molecular Function: chromatin binding (GO:0003682);; Biological Process: regulation of transcription, DNA-templated (GO:0006355);; Biological Process: intracellular signal transduction (GO:0035556);;	--	[K]	Transcription	Putative uncharacterized protein {ECO:0000313|EMBL:CAN72192.1} OS=Vitis vinifera (Grape) PE=4 SV=1	PREDICTED: two-component response regulator ARR1-like [Vitis vinifera]
Vad07G004680.1	Molecular Function: polygalacturonase activity (GO:0004650);; Cellular Component: extracellular region (GO:0005576);; Biological Process: carbohydrate metabolic process (GO:0005975);;	--	--	--	Putative uncharacterized protein {ECO:0000313|EMBL:CAN74591.1} OS=Vitis vinifera (Grape) PE=3 SV=1	PREDICTED: polygalacturonase At1g48100-like isoform X1 [Vitis vinifera]
Vad13G010380.1	--	--	--	--	Putative uncharacterized protein {ECO:0000313|EMBL:CCB44580.1} OS=Vitis vinifera (Grape) PE=4 SV=1	PREDICTED: uncharacterized protein LOC100249909 [Vitis vinifera]
Vad01G013840.1	Molecular Function: DNA binding (GO:0003677);; Molecular Function: DNA-binding transcription factor activity (GO:0003700);; Cellular Component: nucleus (GO:0005634);; Biological Process: regulation of transcription, DNA-templated (GO:0006355);; Molecular Function: protein dimerization activity (GO:0046983);;	K09264|1.33431e-65|vvi:100267653|K09264 MADS-box transcription factor, plant | (RefSeq) FLC; flowering locus C	[K]	Transcription	Putative uncharacterized protein {ECO:0000313|EMBL:CCB51316.1} OS=Vitis vinifera (Grape) PE=4 SV=1	unnamed protein product [Vitis vinifera]
Vad08G011710.1	--	K06965|0|vvi:100241884|K06965 protein pelota | (RefSeq) protein PELOTA 1	[J]	Translation, ribosomal structure and biogenesis	Putative uncharacterized protein {ECO:0000313|EMBL:CBI30195.3} OS=Vitis vinifera (Grape) PE=4 SV=1	PREDICTED: protein PELOTA 1 [Vitis vinifera]
Vad13G005560.1	--	K01054|0|vvi:100261504|K01054 acylglycerol lipase [EC:3.1.1.23] | (RefSeq) caffeoylshikimate esterase	[I]	Lipid transport and metabolism	Putative uncharacterized protein {ECO:0000313|EMBL:CAN82378.1} OS=Vitis vinifera (Grape) PE=4 SV=1	hypothetical protein VITISV_036229 [Vitis vinifera]
Vad04G005420.1	Cellular Component: mitochondrial matrix (GO:0005759);;	K15414|0|vvi:100245704|K15414 complement component 1 Q subcomponent-binding protein, mitochondrial | (RefSeq) uncharacterized protein At2g39795, mitochondrial	[C]	Energy production and conversion	Putative uncharacterized protein {ECO:0000313|EMBL:CBI21087.3} OS=Vitis vinifera (Grape) PE=4 SV=1	PREDICTED: uncharacterized protein At2g39795, mitochondrial [Vitis vinifera]
Vad18G018890.1	--	--	--	--	Putative uncharacterized protein {ECO:0000313|EMBL:CCB61650.1} OS=Vitis vinifera (Grape) PE=4 SV=1	PREDICTED: TMV resistance protein N-like isoform X1 [Vitis vinifera]
Vad03G008180.1	Molecular Function: hydrolase activity, hydrolyzing O-glycosyl compounds (GO:0004553);; Cellular Component: cell wall (GO:0005618);; Biological Process: cellular glucan metabolic process (GO:0006073);; Molecular Function: xyloglucan:xyloglucosyl transferase activity (GO:0016762);; Cellular Component: apoplast (GO:0048046);;	K08235|0|vvi:100261688|K08235 xyloglucan:xyloglucosyl transferase [EC:2.4.1.207] | (RefSeq) probable xyloglucan endotransglucosylase/hydrolase protein 10	--	--	Xyloglucan endotransglucosylase/hydrolase {ECO:0000256|RuleBase:RU361120} OS=Vitis vinifera (Grape) PE=3 SV=1	PREDICTED: probable xyloglucan endotransglucosylase/hydrolase protein 10 [Vitis vinifera]
Vad10G010500.1	Molecular Function: protein serine/threonine kinase activity (GO:0004674);; Molecular Function: calcium ion binding (GO:0005509);; Molecular Function: ATP binding (GO:0005524);; Biological Process: protein phosphorylation (GO:0006468);;	K04733|2.82475e-103|vvi:100264549|K04733 interleukin-1 receptor-associated kinase 4 [EC:2.7.11.1] | (RefSeq) putative wall-associated receptor kinase-like 11	[T]	Signal transduction mechanisms	Putative uncharacterized protein {ECO:0000313|EMBL:CCB55866.1} OS=Vitis vinifera (Grape) PE=4 SV=1	PREDICTED: putative wall-associated receptor kinase-like 11 isoform X2 [Vitis vinifera]
Vad07G000420.1	Cellular Component: membrane (GO:0016020);;	--	[R]	General function prediction only	Putative uncharacterized protein {ECO:0000313|EMBL:CAN60259.1} OS=Vitis vinifera (Grape) PE=4 SV=1	PREDICTED: pentatricopeptide repeat-containing protein At2g29760, chloroplastic-like [Vitis vinifera]
Vad07G003430.1	--	--	[O]	Posttranslational modification, protein turnover, chaperones	Putative uncharacterized protein {ECO:0000313|EMBL:CCB59952.1} OS=Vitis vinifera (Grape) PE=4 SV=1	PREDICTED: uncharacterized protein OsI_027940 isoform X1 [Vitis vinifera]
Vad0G021880.1	--	--	--	--	Putative uncharacterized protein {ECO:0000313|EMBL:CCB57304.1} OS=Vitis vinifera (Grape) PE=4 SV=1	--
Vad12G002800.1	--	K01530|0|vvi:100252404|K01530 phospholipid-translocating ATPase [EC:3.6.3.1] | (RefSeq) phospholipid-transporting ATPase 2	[R]	General function prediction only	Aminophospholipid ATPase isoform 2 {ECO:0000313|EMBL:EOX99483.1} OS=Theobroma cacao (Cacao) PE=4 SV=1	PREDICTED: phospholipid-transporting ATPase 2 isoform X1 [Vitis vinifera]
Vad13G013750.1	Molecular Function: ATP binding (GO:0005524);; Biological Process: obsolete ATP catabolic process (GO:0006200);; Biological Process: rRNA processing (GO:0006364);; Biological Process: tryptophan catabolic process (GO:0006569);; Biological Process: transport (GO:0006810);; Biological Process: aromatic amino acid family biosynthetic process (GO:0009073);; Cellular Component: chloroplast stroma (GO:…	K09013|0|vvi:100243733|K09013 Fe-S cluster assembly ATP-binding protein | (RefSeq) ABC transporter I family member 6, chloroplastic	--	--	Putative uncharacterized protein {ECO:0000313|EMBL:CBI35064.3} OS=Vitis vinifera (Grape) PE=3 SV=1	PREDICTED: ABC transporter I family member 6, chloroplastic [Vitis vinifera]
Vad06G011650.1	Molecular Function: iron ion binding (GO:0005506);; Molecular Function: electron transfer activity (GO:0009055);; Molecular Function: alkane 1-monooxygenase activity (GO:0018685);; Molecular Function: heme binding (GO:0020037);; Biological Process: oxidation-reduction process (GO:0055114);;	--	[QI]	--	Putative uncharacterized protein {ECO:0000313|EMBL:CAN76753.1} OS=Vitis vinifera (Grape) PE=3 SV=1	PREDICTED: cytochrome P450 94C1 [Vitis vinifera]
Vad13G009950.1	Biological Process: defense response (GO:0006952);; Molecular Function: ADP binding (GO:0043531);;	--	[T]	Signal transduction mechanisms	Putative uncharacterized protein {ECO:0000313|EMBL:CAN82120.1} OS=Vitis vinifera (Grape) PE=4 SV=1	hypothetical protein VITISV_009091 [Vitis vinifera]
Vad02G003930.1	--	--	--	--	Putative uncharacterized protein {ECO:0000313|EMBL:CAN60240.1} OS=Vitis vinifera (Grape) PE=4 SV=1	PREDICTED: protein P21 [Vitis vinifera]
Vad18G002900.1	Biological Process: RNA splicing, via endonucleolytic cleavage and ligation (GO:0000394);; Cellular Component: transcription factor TFIIH core complex (GO:0000439);; Biological Process: nucleotide-excision repair (GO:0006289);; Biological Process: regulation of transcription, DNA-templated (GO:0006355);; Biological Process: transcription by RNA polymerase II (GO:0006366);;	K03143|0|vvi:100253978|K03143 transcription initiation factor TFIIH subunit 3 | (RefSeq) RNA polymerase II transcription factor B subunit 4	[KL]	--	Putative uncharacterized protein {ECO:0000313|EMBL:CBI19033.3} OS=Vitis vinifera (Grape) PE=4 SV=1	PREDICTED: general transcription factor IIH subunit 3 [Vitis vinifera]
Vad05G004750.1	--	--	--	--	Putative uncharacterized protein {ECO:0000313|EMBL:CCB48550.1} OS=Vitis vinifera (Grape) PE=4 SV=1	unnamed protein product [Vitis vinifera]
Vad18G019020.1	Biological Process: rRNA processing (GO:0006364);; Biological Process: tRNA metabolic process (GO:0006399);; Cellular Component: chloroplast thylakoid membrane (GO:0009535);; Biological Process: chloroplast relocation (GO:0009902);; Biological Process: thylakoid membrane organization (GO:0010027);; Cellular Component: integral component of membrane (GO:0016021);; Cellular Component: Tic complex (…	--	[OT]	--	Putative uncharacterized protein {ECO:0000313|EMBL:CBI39284.3} OS=Vitis vinifera (Grape) PE=4 SV=1	PREDICTED: protein TIC 40, chloroplastic isoform X1 [Vitis vinifera]
Vad05G000850.1	--	--	--	--	Putative uncharacterized protein {ECO:0000313|EMBL:CBI26033.3} OS=Vitis vinifera (Grape) PE=4 SV=1	unnamed protein product [Vitis vinifera]
Vad08G010290.1	Biological Process: maltose metabolic process (GO:0000023);; Biological Process: pentose-phosphate shunt (GO:0006098);; Cellular Component: chloroplast thylakoid membrane (GO:0009535);; Cellular Component: chloroplast stroma (GO:0009570);; Biological Process: starch biosynthetic process (GO:0019252);; Biological Process: positive regulation of catalytic activity (GO:0043085);;	--	--	--	Putative uncharacterized protein {ECO:0000313|EMBL:CCB55453.1} OS=Vitis vinifera (Grape) PE=4 SV=1	PREDICTED: uncharacterized protein LOC100266598 [Vitis vinifera]
Vad11G008480.1	Biological Process: gene silencing by RNA (GO:0031047);;	--	--	--	Putative uncharacterized protein {ECO:0000313|EMBL:CCB62262.1} OS=Vitis vinifera (Grape) PE=4 SV=1	PREDICTED: factor of DNA methylation 1 [Vitis vinifera]
Vad05G001440.1	Molecular Function: DNA binding (GO:0003677);; Biological Process: DNA methylation (GO:0006306);; Molecular Function: methyltransferase activity (GO:0008168);;	--	[R]	General function prediction only	Putative uncharacterized protein {ECO:0000313|EMBL:CCB50274.1} OS=Vitis vinifera (Grape) PE=4 SV=1	PREDICTED: uncharacterized protein LOC100854837 isoform X1 [Vitis vinifera]
Vad13G012360.1	--	--	--	--	Putative uncharacterized protein {ECO:0000313|EMBL:CBI32164.3} OS=Vitis vinifera (Grape) PE=4 SV=1	PREDICTED: uncharacterized protein LOC100254452 [Vitis vinifera]
Vad10G010210.1	Molecular Function: DNA helicase activity (GO:0003678);; Molecular Function: ATP binding (GO:0005524);; Biological Process: DNA replication (GO:0006260);; Biological Process: DNA duplex unwinding (GO:0032508);;	K17680|0|vvi:100257655|K17680 twinkle protein [EC:3.6.4.12] | (RefSeq) twinkle homolog protein, chloroplastic/mitochondrial	--	--	Putative uncharacterized protein {ECO:0000313|EMBL:CBI31069.3} OS=Vitis vinifera (Grape) PE=4 SV=1	PREDICTED: twinkle homolog protein, chloroplastic/mitochondrial [Vitis vinifera]
Vad10G002030.1	Cellular Component: mitochondrial inner membrane (GO:0005743);; Biological Process: glycolytic process (GO:0006096);; Biological Process: protein targeting to vacuole (GO:0006623);; Biological Process: mitochondrial pyruvate transmembrane transport (GO:0006850);; Biological Process: aerobic respiration (GO:0009060);; Biological Process: response to cadmium ion (GO:0046686);;	--	[S]	Function unknown	Uncharacterized protein {ECO:0000313|EMBL:EXB41545.1} OS=Morus notabilis PE=4 SV=1	PREDICTED: uncharacterized protein LOC100247570 [Vitis vinifera]
Vad04G014110.1	Cellular Component: ubiquitin ligase complex (GO:0000151);; Molecular Function: ubiquitin-protein transferase activity (GO:0004842);; Biological Process: protein ubiquitination (GO:0016567);;	--	--	--	Putative uncharacterized protein {ECO:0000313|EMBL:CCB60435.1} OS=Vitis vinifera (Grape) PE=4 SV=1	PREDICTED: U-box domain-containing protein 27 [Vitis vinifera]
Vad01G014540.1	--	--	--	--	Inducer of CBF expression 1 {ECO:0000313|EMBL:AHM24953.1} OS=Vitis vinifera (Grape) PE=4 SV=1	inducer of CBF expression 1 [Vitis vinifera]
Vad12G003580.1	Molecular Function: calcium ion binding (GO:0005509);;	--	--	--	Putative uncharacterized protein {ECO:0000313|EMBL:CAN81961.1} OS=Vitis vinifera (Grape) PE=4 SV=1	hypothetical protein VITISV_042846 [Vitis vinifera]
Vad18G017430.1	--	--	--	--	Putative uncharacterized protein {ECO:0000313|EMBL:CCB56087.1} OS=Vitis vinifera (Grape) PE=4 SV=1	PREDICTED: proteoglycan 4-like isoform X4 [Vitis vinifera]
Vad18G015030.1	Molecular Function: DNA-binding transcription factor activity (GO:0003700);; Biological Process: regulation of transcription, DNA-templated (GO:0006355);; Molecular Function: sequence-specific DNA binding (GO:0043565);;	--	--	--	Putative uncharacterized protein {ECO:0000313|EMBL:CBI35539.3} OS=Vitis vinifera (Grape) PE=4 SV=1	unnamed protein product [Vitis vinifera]
Vad16G008430.1	Molecular Function: DNA binding (GO:0003677);; Molecular Function: DNA-binding transcription factor activity (GO:0003700);; Cellular Component: nucleus (GO:0005634);; Biological Process: regulation of transcription, DNA-templated (GO:0006355);;	--	--	--	Putative uncharacterized protein {ECO:0000313|EMBL:CAN74147.1} OS=Vitis vinifera (Grape) PE=4 SV=1	PREDICTED: ethylene-responsive transcription factor CRF4 [Vitis vinifera]
Vad09G010610.1	--	--	--	--	Putative uncharacterized protein {ECO:0000313|EMBL:CBI18443.3} OS=Vitis vinifera (Grape) PE=4 SV=1	PREDICTED: uncharacterized protein LOC100244390 isoform X2 [Vitis vinifera]
Vad07G009290.1	Cellular Component: endoplasmic reticulum (GO:0005783);; Biological Process: intracellular protein transport (GO:0006886);; Cellular Component: integral component of membrane (GO:0016021);;	K14009|9.6594e-153|vvi:100255733|K14009 B-cell receptor-associated protein 31 | (RefSeq) B-cell receptor-associated protein 31	[V]	Defense mechanisms	Putative uncharacterized protein {ECO:0000313|EMBL:CCB52381.1} OS=Vitis vinifera (Grape) PE=4 SV=1	PREDICTED: B-cell receptor-associated protein 31 [Vitis vinifera]
Vad04G009850.1	--	--	[K]	Transcription	Putative uncharacterized protein {ECO:0000313|EMBL:CCB44493.1} OS=Vitis vinifera (Grape) PE=4 SV=1	PREDICTED: BEL1-like homeodomain protein 2 [Vitis vinifera]
Vad08G014550.1	Molecular Function: nucleotide binding (GO:0000166);; Molecular Function: 3-oxoacyl-[acyl-carrier-protein] reductase (NADPH) activity (GO:0004316);; Molecular Function: protein binding (GO:0005515);; Biological Process: response to arsenic-containing substance (GO:0046685);; Biological Process: oxidation-reduction process (GO:0055114);;	--	[R]	General function prediction only	Putative uncharacterized protein {ECO:0000313|EMBL:CCB55191.1} OS=Vitis vinifera (Grape) PE=4 SV=1	PREDICTED: LOW QUALITY PROTEIN: pentatricopeptide repeat-containing protein At4g13650 [Vitis vinifera]
Vad14G014140.1	--	--	--	--	Putative uncharacterized protein {ECO:0000313|EMBL:CCB47553.1} OS=Vitis vinifera (Grape) PE=4 SV=1	PREDICTED: zinc-finger homeodomain protein 9 [Vitis vinifera]
Vad01G015160.1	Biological Process: mRNA splicing, via spliceosome (GO:0000398);; Biological Process: RNA methylation (GO:0001510);; Molecular Function: nucleic acid binding (GO:0003676);; Cellular Component: nucleolus (GO:0005730);; Cellular Component: cytosol (GO:0005829);; Biological Process: response to cold (GO:0009409);; Cellular Component: chloroplast (GO:0009507);; Cellular Component: Cajal body (GO:0015…	K11092|0|vvi:100264276|K11092 U2 small nuclear ribonucleoprotein A' | (RefSeq) U2 small nuclear ribonucleoprotein A'	[A]	RNA processing and modification	Putative uncharacterized protein {ECO:0000313|EMBL:CBI29303.3} OS=Vitis vinifera (Grape) PE=4 SV=1	PREDICTED: U2 small nuclear ribonucleoprotein A&apos; [Vitis vinifera]
Vad07G004390.1	Cellular Component: endoplasmic reticulum (GO:0005783);;	--	[S]	Function unknown	Putative uncharacterized protein {ECO:0000313|EMBL:CAN73725.1} OS=Vitis vinifera (Grape) PE=4 SV=1	PREDICTED: transmembrane protein 205 [Vitis vinifera]
Vad12G009830.1	Molecular Function: catalytic activity (GO:0003824);; Biological Process: metabolic process (GO:0008152);; Cellular Component: membrane (GO:0016020);;	--	[I]	Lipid transport and metabolism	Putative uncharacterized protein {ECO:0000313|EMBL:CAN70630.1} OS=Vitis vinifera (Grape) PE=4 SV=1	PREDICTED: lipid phosphate phosphatase epsilon 1, chloroplastic [Vitis vinifera]
Vad18G003630.1	--	--	[R]	General function prediction only	Putative uncharacterized protein {ECO:0000313|EMBL:CCB45540.1} OS=Vitis vinifera (Grape) PE=4 SV=1	PREDICTED: pentatricopeptide repeat-containing protein At4g18520-like [Vitis vinifera]
Vad03G004580.1	--	--	--	--	Putative uncharacterized protein {ECO:0000313|EMBL:CBI32559.3} OS=Vitis vinifera (Grape) PE=4 SV=1	unnamed protein product [Vitis vinifera]
Vad04G013990.1	--	K09131|5.49238e-84|vvi:100259033|K09131 uncharacterized protein | (RefSeq) uncharacterized LOC100259033	[S]	Function unknown	Putative uncharacterized protein {ECO:0000313|EMBL:CAN83055.1} OS=Vitis vinifera (Grape) PE=3 SV=1	PREDICTED: UPF0235 protein C15orf40 [Vitis vinifera]
Vad01G001880.1	Biological Process: glycine catabolic process (GO:0006546);; Biological Process: response to carbohydrate (GO:0009743);;	K02437|5.24099e-46|vvi:100252595|K02437 glycine cleavage system H protein | (RefSeq) glycine cleavage system H protein 2, mitochondrial	[E]	Amino acid transport and metabolism	Putative uncharacterized protein {ECO:0000313|EMBL:CCB50995.1} OS=Vitis vinifera (Grape) PE=4 SV=1	PREDICTED: glycine cleavage system H protein 2, mitochondrial [Vitis vinifera]
Vad15G009010.1	Molecular Function: transporter activity (GO:0005215);; Biological Process: transport (GO:0006810);; Cellular Component: integral component of membrane (GO:0016021);;	K09872|0|vvi:100265390|K09872 aquaporin PIP | (RefSeq) aquaporin PIP1-2	[G]	Carbohydrate transport and metabolism	Putative uncharacterized protein {ECO:0000313|EMBL:CCB62434.1} OS=Vitis vinifera (Grape) PE=3 SV=1	PREDICTED: aquaporin PIP1-2 [Vitis vinifera]
Vad16G010200.1	Molecular Function: calcium-dependent protein serine/threonine phosphatase activity (GO:0004723);; Molecular Function: calcium ion binding (GO:0005509);; Biological Process: detection of calcium ion (GO:0005513);; Cellular Component: cytoplasm (GO:0005737);; Cellular Component: calcineurin complex (GO:0005955);; Biological Process: stomatal movement (GO:0010118);; Biological Process: calcium-medi…	K06268|1.31685e-154|vvi:100246874|K06268 serine/threonine-protein phosphatase 2B regulatory subunit | (RefSeq) CBL04, CBL4; calcineurin B-like protein 04	[T]	Signal transduction mechanisms	Calcineurin B-like protein 04 {ECO:0000313|EMBL:ACQ83558.1} OS=Vitis vinifera (Grape) PE=2 SV=1	uncharacterized protein LOC100246874 [Vitis vinifera]
Vad15G009470.1	Molecular Function: RNA binding (GO:0003723);; Molecular Function: structural constituent of ribosome (GO:0003735);; Cellular Component: nucleus (GO:0005634);; Cellular Component: ribosome (GO:0005840);; Biological Process: rRNA processing (GO:0006364);; Biological Process: translation (GO:0006412);; Cellular Component: chloroplast stroma (GO:0009570);; Biological Process: embryo development endi…	K02888|2.02141e-142|vvi:100255002|K02888 large subunit ribosomal protein L21 | (RefSeq) 50S ribosomal protein L21, chloroplastic	[J]	Translation, ribosomal structure and biogenesis	Putative uncharacterized protein {ECO:0000313|EMBL:CBI40346.3} OS=Vitis vinifera (Grape) PE=3 SV=1	PREDICTED: 50S ribosomal protein L21, chloroplastic [Vitis vinifera]
Vad11G004860.1	Molecular Function: zinc ion binding (GO:0008270);; Molecular Function: oxidoreductase activity (GO:0016491);; Biological Process: oxidation-reduction process (GO:0055114);;	--	[R]	General function prediction only	Putative uncharacterized protein {ECO:0000313|EMBL:CAN65024.1} OS=Vitis vinifera (Grape) PE=4 SV=1	PREDICTED: pentatricopeptide repeat-containing protein At5g66520-like [Vitis vinifera]
Vad0G014020.1	--	K01930|2.2021e-27|sind:105167122|K01930 folylpolyglutamate synthase [EC:6.3.2.17] | (RefSeq) folylpolyglutamate synthase	[H]	Coenzyme transport and metabolism	Folylpolyglutamate synthase {ECO:0000313|EMBL:EED89337.1} OS=Thalassiosira pseudonana (Marine diatom) PE=4 SV=1	hypothetical protein V501_08094 [Pseudogymnoascus pannorum VKM F-4519 (FW-2642)]
Vad18G000350.1	Molecular Function: zinc ion binding (GO:0008270);;	--	--	--	Putative uncharacterized protein {ECO:0000313|EMBL:CCB62682.1} OS=Vitis vinifera (Grape) PE=4 SV=1	PREDICTED: protein FAR1-RELATED SEQUENCE 5-like [Vitis vinifera]
Vad09G002390.1	Molecular Function: protein serine/threonine kinase activity (GO:0004674);; Molecular Function: ATP binding (GO:0005524);; Biological Process: protein phosphorylation (GO:0006468);;	K04733|0|vvi:100261776|K04733 interleukin-1 receptor-associated kinase 4 [EC:2.7.11.1] | (RefSeq) putative leucine-rich repeat receptor-like serine/threonine-protein kinase At2g19230	--	--	Putative uncharacterized protein {ECO:0000313|EMBL:CCB59377.1} OS=Vitis vinifera (Grape) PE=4 SV=1	unnamed protein product [Vitis vinifera]
Vad14G003840.1	Molecular Function: ATP binding (GO:0005524);; Biological Process: defense response (GO:0006952);; Molecular Function: nucleoside-triphosphatase activity (GO:0017111);; Molecular Function: ADP binding (GO:0043531);;	--	[T]	Signal transduction mechanisms	Putative uncharacterized protein {ECO:0000313|EMBL:CBI34345.3} OS=Vitis vinifera (Grape) PE=4 SV=1	PREDICTED: probable disease resistance protein At4g27220 [Vitis vinifera]
Vad12G001100.1	Molecular Function: superoxide dismutase activity (GO:0004784);; Cellular Component: extracellular region (GO:0005576);; Molecular Function: manganese ion binding (GO:0030145);; Molecular Function: nutrient reservoir activity (GO:0045735);; Biological Process: oxidation-reduction process (GO:0055114);;	--	--	--	Putative uncharacterized protein {ECO:0000313|EMBL:CCB47424.1} OS=Vitis vinifera (Grape) PE=4 SV=1	PREDICTED: putative germin-like protein 9-2 [Vitis vinifera]
Vad08G013650.1	--	--	--	--	Putative uncharacterized protein {ECO:0000313|EMBL:CCB55237.1} OS=Vitis vinifera (Grape) PE=4 SV=1	PREDICTED: uncharacterized protein LOC104880119 [Vitis vinifera]
Vad17G001980.1	Molecular Function: RNA binding (GO:0003723);; Molecular Function: RNA-directed DNA polymerase activity (GO:0003964);; Biological Process: RNA-dependent DNA biosynthetic process (GO:0006278);;	--	[R]	General function prediction only	Putative uncharacterized protein {ECO:0000313|EMBL:CCB43284.1} OS=Vitis vinifera (Grape) PE=4 SV=1	PREDICTED: protection of telomeres protein 1b-like isoform X1 [Vitis vinifera]
Vad06G010750.1	--	--	--	--	Putative uncharacterized protein {ECO:0000313|EMBL:CBI36632.3} OS=Vitis vinifera (Grape) PE=4 SV=1	unnamed protein product [Vitis vinifera]
Vad07G018840.1	--	--	--	--	Putative uncharacterized protein {ECO:0000313|EMBL:CCB51331.1} OS=Vitis vinifera (Grape) PE=4 SV=1	unnamed protein product [Vitis vinifera]
Vad10G007620.1	--	--	[S]	Function unknown	Putative uncharacterized protein {ECO:0000313|EMBL:CAN82387.1} OS=Vitis vinifera (Grape) PE=4 SV=1	PREDICTED: uncharacterized protein LOC100241279 [Vitis vinifera]
Vad01G012310.1	--	--	--	--	Putative uncharacterized protein {ECO:0000313|EMBL:CCB51225.1} OS=Vitis vinifera (Grape) PE=4 SV=1	PREDICTED: myosin-11 [Vitis vinifera]
Vad0G003630.1	--	--	[J]	Translation, ribosomal structure and biogenesis	Translation initiation factor IF-2 {ECO:0000256|RuleBase:RU000644} (Fragment) OS=Sorghum bicolor (Sorghum) PE=3 SV=1	hypothetical protein SORBIDRAFT_2001s002010 [Sorghum bicolor]
Vad12G000100.1	Molecular Function: catalytic activity (GO:0003824);; Biological Process: cellular metabolic process (GO:0044237);; Molecular Function: coenzyme binding (GO:0050662);;	--	[V]	Defense mechanisms	Putative uncharacterized protein {ECO:0000313|EMBL:CBI31772.3} OS=Vitis vinifera (Grape) PE=4 SV=1	PREDICTED: cinnamoyl-CoA reductase 2 [Vitis vinifera]
Vad10G005840.1	--	--	--	--	Putative uncharacterized protein {ECO:0000313|EMBL:CBI33237.3} OS=Vitis vinifera (Grape) PE=4 SV=1	unnamed protein product [Vitis vinifera]
Vad18G008930.1	Molecular Function: oxidoreductase activity (GO:0016491);; Molecular Function: metal ion binding (GO:0046872);;	--	[Q]	Secondary metabolites biosynthesis, transport and catabolism	Putative uncharacterized protein {ECO:0000313|EMBL:CCB45893.1} OS=Vitis vinifera (Grape) PE=3 SV=1	PREDICTED: cytochrome P450 82A1-like [Vitis vinifera]
Vad13G008080.1	--	--	[R]	General function prediction only	Putative uncharacterized protein {ECO:0000313|EMBL:CCB52144.1} OS=Vitis vinifera (Grape) PE=4 SV=1	PREDICTED: ankyrin repeat-containing protein At5g02620-like [Vitis vinifera]
Vad10G008980.1	--	--	[R]	General function prediction only	Putative uncharacterized protein {ECO:0000313|EMBL:CCB48616.1} OS=Vitis vinifera (Grape) PE=4 SV=1	unnamed protein product [Vitis vinifera]
Vad0G002100.1	--	--	--	--	MFS transporter, PPP family, 3-phenylpropionic acid transporter {ECO:0000313|EMBL:JAC64628.1} OS=Tetraselmis sp. GSL018 PE=4 SV=1	--
Vad12G007250.1	Molecular Function: phosphorelay sensor kinase activity (GO:0000155);; Molecular Function: phosphorelay response regulator activity (GO:0000156);; Biological Process: phosphorelay signal transduction system (GO:0000160);; Molecular Function: osmosensor activity (GO:0005034);; Molecular Function: ATP binding (GO:0005524);; Biological Process: regulation of transcription, DNA-templated (GO:0006355)…	K14489|0|vvi:100263145|K14489 arabidopsis histidine kinase 2/3/4 (cytokinin receptor) [EC:2.7.13.3] | (RefSeq) CYT1; histidine kinase 2	[T]	Signal transduction mechanisms	Putative uncharacterized protein {ECO:0000313|EMBL:CCB51723.1} OS=Vitis vinifera (Grape) PE=4 SV=1	PREDICTED: histidine kinase 2 [Vitis vinifera]
Vad09G007040.1	--	K10268|0|vvi:100259281|K10268 F-box and leucine-rich repeat protein 2/20 | (RefSeq) F-box/LRR-repeat protein 14	[R]	General function prediction only	Putative uncharacterized protein {ECO:0000313|EMBL:CCB59694.1} OS=Vitis vinifera (Grape) PE=4 SV=1	PREDICTED: F-box/LRR-repeat protein 14 [Vitis vinifera]
Vad05G011660.1	Molecular Function: chitinase activity (GO:0004568);; Cellular Component: cell wall (GO:0005618);; Biological Process: carbohydrate metabolic process (GO:0005975);; Biological Process: chitin catabolic process (GO:0006032);; Molecular Function: chitin binding (GO:0008061);; Biological Process: somatic embryogenesis (GO:0010262);; Biological Process: cell wall macromolecule catabolic process (GO:0…	K01183|0|vvi:100245803|K01183 chitinase [EC:3.2.1.14] | (RefSeq) endochitinase EP3	[R]	General function prediction only	Putative uncharacterized protein {ECO:0000313|EMBL:CCB49362.1} OS=Vitis vinifera (Grape) PE=4 SV=1	PREDICTED: endochitinase PR4 [Vitis vinifera]
Vad14G007790.1	Cellular Component: mitochondrion (GO:0005739);; Biological Process: cellular process (GO:0009987);; Molecular Function: oxidoreductase activity, acting on a sulfur group of donors (GO:0016667);; Molecular Function: ion binding (GO:0043167);; Biological Process: oxidation-reduction process (GO:0055114);;	K00382|1.91725e-30|vvi:100246037|K00382 dihydrolipoamide dehydrogenase [EC:1.8.1.4] | (RefSeq) dihydrolipoyl dehydrogenase, mitochondrial	[C]	Energy production and conversion	Putative uncharacterized protein {ECO:0000313|EMBL:CCB60250.1} OS=Vitis vinifera (Grape) PE=4 SV=1	PREDICTED: dihydrolipoyl dehydrogenase, mitochondrial [Vitis vinifera]
Vad0G020950.1	--	--	--	--	--	hypothetical protein SMAC_11603 [Sordaria macrospora k-hell]
Vad15G008050.1	Molecular Function: hydrolase activity, hydrolyzing O-glycosyl compounds (GO:0004553);; Biological Process: carbohydrate metabolic process (GO:0005975);;	K01183|0|egr:104443397|K01183 chitinase [EC:3.2.1.14] | (RefSeq) acidic endochitinase	[M]	Cell wall/membrane/envelope biogenesis	Putative uncharacterized protein {ECO:0000313|EMBL:CCB62483.1} OS=Vitis vinifera (Grape) PE=3 SV=1	PREDICTED: chitinase 1-like [Eucalyptus grandis]
Vad02G008490.1	--	--	--	--	Putative uncharacterized protein {ECO:0000313|EMBL:CBI33842.3} OS=Vitis vinifera (Grape) PE=4 SV=1	PREDICTED: uncharacterized protein LOC100245368 [Vitis vinifera]
Vad15G008660.1	--	--	--	--	Putative uncharacterized protein {ECO:0000313|EMBL:CCB62453.1} OS=Vitis vinifera (Grape) PE=4 SV=1	PREDICTED: protein BPS1, chloroplastic-like [Vitis vinifera]
Vad10G004080.1	Molecular Function: magnesium ion binding (GO:0000287);; Biological Process: metabolic process (GO:0008152);; Molecular Function: terpene synthase activity (GO:0010333);; Molecular Function: S-linalool synthase activity (GO:0034007);;	K15086|0|vvi:100853562|K15086 (3S)-linalool synthase [EC:4.2.3.25] | (RefSeq) (3S,6E)-nerolidol synthase 1	--	--	(3S)-linalool/(E)-nerolidol synthase {ECO:0000313|EMBL:ADR74210.1} OS=Vitis vinifera (Grape) PE=2 SV=1	PREDICTED: (3S,6E)-nerolidol synthase 1-like isoform X1 [Vitis vinifera]
Vad06G006010.1	Molecular Function: non-membrane spanning protein tyrosine kinase activity (GO:0004715);; Molecular Function: ATP binding (GO:0005524);; Biological Process: protein phosphorylation (GO:0006468);;	--	[T]	Signal transduction mechanisms	Putative uncharacterized protein {ECO:0000313|EMBL:CBI15907.3} OS=Vitis vinifera (Grape) PE=4 SV=1	PREDICTED: probable serine/threonine-protein kinase drkD [Vitis vinifera]
Vad14G014070.1	--	K06675|9.05764e-36|thj:104805468|K06675 structural maintenance of chromosome 4 | (RefSeq) structural maintenance of chromosomes protein 4	[BD]	--	Putative uncharacterized protein {ECO:0000313|EMBL:CBI22206.3} OS=Vitis vinifera (Grape) PE=4 SV=1	unnamed protein product [Vitis vinifera]
Vad19G004200.1	Molecular Function: oxidoreductase activity, acting on paired donors, with incorporation or reduction of molecular oxygen, 2-oxoglutarate as one donor, and incorporation of one atom each of oxygen into both donors (GO:0016706);; Biological Process: oxidation-reduction process (GO:0055114);;	K04125|0|vvi:100258946|K04125 gibberellin 2-oxidase [EC:1.14.11.13] | (RefSeq) GA2ox6; gibberellin 2-beta-dioxygenase 8-like	[QR]	--	Putative uncharacterized protein {ECO:0000313|EMBL:CCB48794.1} OS=Vitis vinifera (Grape) PE=3 SV=1	gibberellin 2-beta-dioxygenase 8-like [Vitis vinifera]
Vad14G002540.1	Cellular Component: extracellular region (GO:0005576);; Molecular Function: manganese ion binding (GO:0030145);; Molecular Function: nutrient reservoir activity (GO:0045735);;	--	--	--	Putative uncharacterized protein {ECO:0000313|EMBL:CCB59934.1} OS=Vitis vinifera (Grape) PE=4 SV=1	unnamed protein product [Vitis vinifera]
Vad01G012350.1	Molecular Function: zinc ion binding (GO:0008270);;	--	[O]	Posttranslational modification, protein turnover, chaperones	Putative uncharacterized protein {ECO:0000313|EMBL:CBI27524.3} OS=Vitis vinifera (Grape) PE=4 SV=1	PREDICTED: peroxisome biogenesis factor 10 [Vitis vinifera]
Vad09G003820.1	Molecular Function: catalytic activity (GO:0003824);; Cellular Component: cytosol (GO:0005829);; Biological Process: protein folding (GO:0006457);; Biological Process: response to heat (GO:0009408);; Biological Process: response to high light intensity (GO:0009644);; Biological Process: response to endoplasmic reticulum stress (GO:0034976);; Biological Process: response to hydrogen peroxide (GO:0…	K06215|0|vvi:100242970|K06215 pyridoxal 5'-phosphate synthase pdxS subunit [EC:4.3.3.6] | (RefSeq) pyridoxal 5'-phosphate synthase-like subunit PDX1.2	[H]	Coenzyme transport and metabolism	Putative uncharacterized protein {ECO:0000313|EMBL:CCB59473.1} OS=Vitis vinifera (Grape) PE=4 SV=1	PREDICTED: probable pyridoxal biosynthesis protein PDX1.2 [Vitis vinifera]
Vad0G013050.1	Biological Process: cellular amino acid metabolic process (GO:0006520);; Biological Process: cellular aromatic compound metabolic process (GO:0006725);; Biological Process: defense response (GO:0006952);; Biological Process: monocarboxylic acid metabolic process (GO:0032787);; Biological Process: cellular process (GO:0044763);; Biological Process: carboxylic acid biosynthetic process (GO:0046394)…	K01807|1.76516e-36|nnu:104596605|K01807 ribose 5-phosphate isomerase A [EC:5.3.1.6] | (RefSeq) probable ribose-5-phosphate isomerase 3, chloroplastic	[G]	Carbohydrate transport and metabolism	Putative ribose-5-phosphate isomerase {ECO:0000313|EMBL:AHA84257.1} OS=Phaseolus vulgaris (Kidney bean) PE=2 SV=1	PREDICTED: probable ribose-5-phosphate isomerase 3, chloroplastic [Nelumbo nucifera]
Vad19G009040.1	Molecular Function: ATP binding (GO:0005524);; Biological Process: defense response (GO:0006952);; Molecular Function: nucleoside-triphosphatase activity (GO:0017111);; Molecular Function: ADP binding (GO:0043531);;	--	[T]	Signal transduction mechanisms	Putative uncharacterized protein {ECO:0000313|EMBL:CAN65320.1} OS=Vitis vinifera (Grape) PE=4 SV=1	PREDICTED: probable disease resistance protein At1g12280 [Vitis vinifera]
Vad07G017150.1	Molecular Function: transferase activity, transferring phosphorus-containing groups (GO:0016772);;	--	[R]	General function prediction only	Putative uncharacterized protein {ECO:0000313|EMBL:CCB47111.1} OS=Vitis vinifera (Grape) PE=4 SV=1	PREDICTED: uncharacterized aarF domain-containing protein kinase At1g79600, chloroplastic [Vitis vinifera]
Vad17G001460.1	Molecular Function: adenylate kinase activity (GO:0004017);; Molecular Function: copper ion binding (GO:0005507);; Molecular Function: ATP binding (GO:0005524);; Cellular Component: mitochondrion (GO:0005739);; Cellular Component: plasma membrane (GO:0005886);; Biological Process: purine nucleotide metabolic process (GO:0006163);; Biological Process: response to cadmium ion (GO:0046686);; Biologi…	K00939|1.338e-179|vvi:100245612|K00939 adenylate kinase [EC:2.7.4.3] | (RefSeq) adenylate kinase 4	[F]	Nucleotide transport and metabolism	Putative uncharacterized protein {ECO:0000313|EMBL:CBI15633.3} OS=Vitis vinifera (Grape) PE=3 SV=1	PREDICTED: adenylate kinase 4 [Vitis vinifera]
Vad07G008320.1	Cellular Component: endoplasmic reticulum membrane (GO:0005789);; Molecular Function: nitrate reductase (NADH) activity (GO:0009703);; Cellular Component: integral component of membrane (GO:0016021);; Biological Process: sterol biosynthetic process (GO:0016126);; Biological Process: pentacyclic triterpenoid biosynthetic process (GO:0019745);; Molecular Function: heme binding (GO:0020037);; Biolog…	--	[C]	Energy production and conversion	Putative uncharacterized protein {ECO:0000313|EMBL:CAN78289.1} OS=Vitis vinifera (Grape) PE=3 SV=1	PREDICTED: cytochrome b5 [Vitis vinifera]
Vad09G008820.1	Molecular Function: ATP binding (GO:0005524);; Molecular Function: nucleoside-triphosphatase activity (GO:0017111);;	K11269|1.96975e-33|vvi:100244400|K11269 chromosome transmission fidelity protein 18 | (RefSeq) chromosome transmission fidelity protein 18 homolog	[DL]	--	Putative uncharacterized protein {ECO:0000313|EMBL:CCB50092.1} OS=Vitis vinifera (Grape) PE=4 SV=1	hypothetical protein VITISV_003510 [Vitis vinifera]
Vad01G013550.1	Cellular Component: chromatin (GO:0000785);; Cellular Component: condensed nuclear chromosome (GO:0000794);; Molecular Function: DNA binding (GO:0003677);; Cellular Component: nucleoplasm (GO:0005654);; Biological Process: double-strand break repair (GO:0006302);; Biological Process: sister chromatid cohesion (GO:0007062);; Biological Process: reciprocal meiotic recombination (GO:0007131);; Biolo…	--	[B]	Chromatin structure and dynamics	Putative uncharacterized protein {ECO:0000313|EMBL:CBI27651.3} OS=Vitis vinifera (Grape) PE=4 SV=1	unnamed protein product [Vitis vinifera]
Vad10G013050.1	--	K03798|4.25319e-23|vvi:100244978|K03798 cell division protease FtsH [EC:3.4.24.-] | (RefSeq) ATP-dependent zinc metalloprotease FTSH 12, chloroplastic	[O]	Posttranslational modification, protein turnover, chaperones	Putative uncharacterized protein {ECO:0000313|EMBL:CCB61748.1} OS=Vitis vinifera (Grape) PE=4 SV=1	unnamed protein product [Vitis vinifera]
Vad05G004240.1	Molecular Function: nucleic acid binding (GO:0003676);; Molecular Function: metal ion binding (GO:0046872);;	--	--	--	Putative uncharacterized protein {ECO:0000313|EMBL:CAN69278.1} OS=Vitis vinifera (Grape) PE=4 SV=1	hypothetical protein VITISV_004877 [Vitis vinifera]
Vad14G005440.1	--	K08770|0|vvi:100259635|K08770 ubiquitin C | (RefSeq) polyubiquitin	[OR]	--	Putative uncharacterized protein {ECO:0000313|EMBL:CCB47636.1} OS=Vitis vinifera (Grape) PE=4 SV=1	PREDICTED: polyubiquitin-C-like [Vitis vinifera]
Vad12G009010.1	--	--	--	--	Putative uncharacterized protein {ECO:0000313|EMBL:CCB48713.1} OS=Vitis vinifera (Grape) PE=4 SV=1	PREDICTED: uncharacterized protein LOC100246257 [Vitis vinifera]
Vad06G005580.1	Molecular Function: nucleic acid binding (GO:0003676);; Molecular Function: DNA-binding transcription factor activity (GO:0003700);; Biological Process: regulation of transcription, DNA-templated (GO:0006355);; Biological Process: ER to Golgi vesicle-mediated transport (GO:0006888);; Molecular Function: zinc ion binding (GO:0008270);; Biological Process: amino acid import (GO:0043090);;	--	[R]	General function prediction only	Putative uncharacterized protein {ECO:0000313|EMBL:CAN78824.1} OS=Vitis vinifera (Grape) PE=4 SV=1	hypothetical protein VITISV_006556 [Vitis vinifera]
Vad06G011510.1	Molecular Function: protein serine/threonine kinase activity (GO:0004674);; Molecular Function: ATP binding (GO:0005524);; Biological Process: protein phosphorylation (GO:0006468);; Cellular Component: chloroplast (GO:0009507);;	--	[R]	General function prediction only	Putative uncharacterized protein {ECO:0000313|EMBL:CAN83229.1} OS=Vitis vinifera (Grape) PE=4 SV=1	hypothetical protein VITISV_002764 [Vitis vinifera]
Vad19G007210.1	Molecular Function: RNA binding (GO:0003723);;	K14945|0|vvi:100246386|K14945 protein quaking | (RefSeq) RNA-binding KH domain-containing-like	[A]	RNA processing and modification	Putative uncharacterized protein {ECO:0000313|EMBL:CBI39805.3} OS=Vitis vinifera (Grape) PE=4 SV=1	PREDICTED: KH domain-containing protein At5g56140 [Vitis vinifera]
Vad13G012750.1	Molecular Function: magnesium ion binding (GO:0000287);; Cellular Component: plastid (GO:0009536);; Molecular Function: terpene synthase activity (GO:0010333);; Biological Process: terpenoid biosynthetic process (GO:0016114);;	--	--	--	Putative uncharacterized protein {ECO:0000313|EMBL:CCB62298.1} OS=Vitis vinifera (Grape) PE=4 SV=1	PREDICTED: (-)-alpha-terpineol synthase [Vitis vinifera]
Vad0G015390.1	Biological Process: response to reactive oxygen species (GO:0000302);; Molecular Function: serine-type endopeptidase activity (GO:0004252);; Biological Process: proteolysis (GO:0006508);; Cellular Component: chloroplast stroma (GO:0009570);; Biological Process: systemic acquired resistance (GO:0009627);; Cellular Component: chloroplast envelope (GO:0009941);; Biological Process: regulation of gen…	K01358|7.25247e-85|vvi:100855178|K01358 ATP-dependent Clp protease, protease subunit [EC:3.4.21.92] | (RefSeq) ATP-dependent Clp protease proteolytic subunit-related protein 4, chloroplastic	[O]	Posttranslational modification, protein turnover, chaperones	ATP-dependent Clp protease proteolytic subunit {ECO:0000256|RuleBase:RU003567} OS=Vitis vinifera (Grape) PE=3 SV=1	unnamed protein product [Vitis vinifera]
Vad0G002110.1	--	--	--	--	Uncharacterized protein {ECO:0000313|EMBL:EPS74531.1} (Fragment) OS=Genlisea aurea PE=4 SV=1	hypothetical protein M569_00248, partial [Genlisea aurea]
Vad16G002910.1	--	K04567|4.11155e-07|gra:105799957|K04567 lysyl-tRNA synthetase, class II [EC:6.1.1.6] | (RefSeq) lysine--tRNA ligase-like	[J]	Translation, ribosomal structure and biogenesis	Putative uncharacterized protein {ECO:0000313|EMBL:CBI38622.3} OS=Vitis vinifera (Grape) PE=4 SV=1	unnamed protein product [Vitis vinifera]
Vad08G010400.1	--	--	[R]	General function prediction only	Putative uncharacterized protein {ECO:0000313|EMBL:CAN68552.1} OS=Vitis vinifera (Grape) PE=4 SV=1	PREDICTED: pentatricopeptide repeat-containing protein At2g33760-like [Vitis vinifera]
Vad0G000750.1	--	K17592|7.28971e-26|vvi:100252577|K17592 sacsin | (RefSeq) uncharacterized LOC100252577	--	--	Putative uncharacterized protein {ECO:0000313|EMBL:CCB57807.1} OS=Vitis vinifera (Grape) PE=4 SV=1	hypothetical protein VITISV_012006 [Vitis vinifera]
Vad07G008420.1	Molecular Function: protein serine/threonine kinase activity (GO:0004674);; Molecular Function: ATP binding (GO:0005524);; Cellular Component: plasma membrane (GO:0005886);; Biological Process: protein phosphorylation (GO:0006468);;	--	[T]	Signal transduction mechanisms	Putative uncharacterized protein {ECO:0000313|EMBL:CBI37322.3} OS=Vitis vinifera (Grape) PE=3 SV=1	PREDICTED: serine/threonine-protein kinase At3g07070 [Vitis vinifera]
Vad10G004950.1	--	--	--	--	Putative uncharacterized protein {ECO:0000313|EMBL:CBI18601.3} OS=Vitis vinifera (Grape) PE=4 SV=1	PREDICTED: uncharacterized protein LOC100241834 [Vitis vinifera]
Vad0G017830.1	--	--	--	--	Putative uncharacterized protein {ECO:0000313|EMBL:CCB48750.1} OS=Vitis vinifera (Grape) PE=4 SV=1	PREDICTED: TMV resistance protein N-like [Vitis vinifera]
Vad10G005060.1	Molecular Function: chromatin binding (GO:0003682);;	--	--	--	Putative uncharacterized protein {ECO:0000313|EMBL:CAN77990.1} OS=Vitis vinifera (Grape) PE=4 SV=1	hypothetical protein VITISV_037732 [Vitis vinifera]
Vad06G004230.1	--	--	[G]	Carbohydrate transport and metabolism	Putative uncharacterized protein {ECO:0000313|EMBL:CBI16081.3} OS=Vitis vinifera (Grape) PE=4 SV=1	PREDICTED: uncharacterized protein LOC100244977 [Vitis vinifera]
Vad12G003000.1	Molecular Function: protein serine/threonine kinase activity (GO:0004674);; Molecular Function: ATP binding (GO:0005524);; Biological Process: protein phosphorylation (GO:0006468);; Biological Process: recognition of pollen (GO:0048544);;	--	--	--	Serine/threonine-protein kinase {ECO:0000256|PIRNR:PIRNR000641} OS=Vitis vinifera (Grape) PE=3 SV=1	PREDICTED: G-type lectin S-receptor-like serine/threonine-protein kinase At2g19130 isoform X1 [Vitis vinifera]
Vad16G002970.1	--	--	[S]	Function unknown	Putative uncharacterized protein {ECO:0000313|EMBL:CCB51848.1} OS=Vitis vinifera (Grape) PE=4 SV=1	hypothetical protein VITISV_014553 [Vitis vinifera]
Vad01G011830.1	Molecular Function: nucleic acid binding (GO:0003676);; Cellular Component: nucleus (GO:0005634);; Biological Process: DNA replication initiation (GO:0006270);; Biological Process: cellular response to DNA damage stimulus (GO:0006974);; Molecular Function: zinc ion binding (GO:0008270);; Biological Process: vegetative to reproductive phase transition of meristem (GO:0010228);; Biological Process:…	K10904|0|vvi:100240999|K10904 TIMELESS-interacting protein | (RefSeq) TIMELESS-interacting protein	[D]	Cell cycle control, cell division, chromosome partitioning	Putative uncharacterized protein {ECO:0000313|EMBL:CBI27478.3} OS=Vitis vinifera (Grape) PE=4 SV=1	PREDICTED: TIMELESS-interacting protein isoform X1 [Vitis vinifera]
Vad0G012470.1	Molecular Function: inorganic diphosphatase activity (GO:0004427);; Molecular Function: hydrogen-translocating pyrophosphatase activity (GO:0009678);; Biological Process: proton transmembrane transport (GO:0015992);; Cellular Component: membrane (GO:0016020);;	K01507|0|vvi:100256710|K01507 inorganic pyrophosphatase [EC:3.6.1.1] | (RefSeq) pyrophosphate-energized vacuolar membrane proton pump	--	--	Putative uncharacterized protein {ECO:0000313|EMBL:CBI36393.3} OS=Vitis vinifera (Grape) PE=3 SV=1	PREDICTED: pyrophosphate-energized vacuolar membrane proton pump [Vitis vinifera]
Vad09G001820.1	--	--	--	--	Uncharacterized protein {ECO:0000313|EMBL:KDP40764.1} OS=Jatropha curcas (Barbados nut) PE=4 SV=1	PREDICTED: LOB domain-containing protein 22 [Vitis vinifera]
Vad18G010930.1	Molecular Function: RNA binding (GO:0003723);; Molecular Function: RNA-directed DNA polymerase activity (GO:0003964);; Biological Process: RNA-dependent DNA biosynthetic process (GO:0006278);; Molecular Function: zinc ion binding (GO:0008270);; Biological Process: DNA integration (GO:0015074);;	--	--	--	Putative uncharacterized protein {ECO:0000313|EMBL:CCB61272.1} OS=Vitis vinifera (Grape) PE=4 SV=1	hypothetical protein VITISV_009673 [Vitis vinifera]
Vad13G013360.1	Molecular Function: protein tyrosine kinase activity (GO:0004713);; Molecular Function: ATP binding (GO:0005524);; Biological Process: protein phosphorylation (GO:0006468);; Cellular Component: integral component of membrane (GO:0016021);;	--	--	--	Putative uncharacterized protein {ECO:0000313|EMBL:CCB58633.1} OS=Vitis vinifera (Grape) PE=4 SV=1	PREDICTED: probable leucine-rich repeat receptor-like protein kinase At1g35710 [Vitis vinifera]
Vad18G011060.1	--	K14488|5.17447e-72|vvi:100245466|K14488 SAUR family protein | (RefSeq) auxin-responsive protein SAUR21	--	--	Putative uncharacterized protein {ECO:0000313|EMBL:CCB46024.1} OS=Vitis vinifera (Grape) PE=4 SV=1	PREDICTED: auxin-induced protein 15A [Vitis vinifera]
Vad01G005230.1	--	--	--	--	Putative uncharacterized protein {ECO:0000313|EMBL:CBI26853.3} OS=Vitis vinifera (Grape) PE=4 SV=1	PREDICTED: protein PLANT CADMIUM RESISTANCE 2 [Vitis vinifera]
Vad18G003740.1	Molecular Function: nucleic acid binding (GO:0003676);;	K12875|0|vvi:100248897|K12875 apoptotic chromatin condensation inducer in the nucleus | (RefSeq) apoptotic chromatin condensation inducer in the nucleus	[B]	Chromatin structure and dynamics	Putative uncharacterized protein {ECO:0000313|EMBL:CBI19114.3} OS=Vitis vinifera (Grape) PE=4 SV=1	PREDICTED: apoptotic chromatin condensation inducer in the nucleus-like isoform X1 [Vitis vinifera]
Vad08G010120.1	Molecular Function: carboxypeptidase activity (GO:0004180);; Biological Process: proteolysis (GO:0006508);; Molecular Function: serine-type peptidase activity (GO:0008236);;	K01285|0|vvi:100252778|K01285 lysosomal Pro-X carboxypeptidase [EC:3.4.16.2] | (RefSeq) lysosomal Pro-X carboxypeptidase	[OR]	--	Putative uncharacterized protein {ECO:0000313|EMBL:CCB55459.1} OS=Vitis vinifera (Grape) PE=4 SV=1	PREDICTED: lysosomal Pro-X carboxypeptidase-like [Vitis vinifera]
Vad04G010840.1	Molecular Function: magnesium ion binding (GO:0000287);; Molecular Function: inorganic diphosphatase activity (GO:0004427);; Cellular Component: cytoplasm (GO:0005737);; Biological Process: phosphate-containing compound metabolic process (GO:0006796);; Cellular Component: membrane (GO:0016020);;	K01507|1.75266e-157|vvi:100254798|K01507 inorganic pyrophosphatase [EC:3.6.1.1] | (RefSeq) soluble inorganic pyrophosphatase 1	[C]	Energy production and conversion	Putative uncharacterized protein {ECO:0000313|EMBL:CBI17491.3} OS=Vitis vinifera (Grape) PE=3 SV=1	PREDICTED: soluble inorganic pyrophosphatase isoform X1 [Vitis vinifera]
Vad11G006430.1	Molecular Function: DNA-binding transcription factor activity (GO:0003700);; Cellular Component: nucleus (GO:0005634);; Biological Process: regulation of transcription, DNA-templated (GO:0006355);; Molecular Function: sequence-specific DNA binding (GO:0043565);;	--	[K]	Transcription	Putative uncharacterized protein {ECO:0000313|EMBL:CCB49936.1} OS=Vitis vinifera (Grape) PE=4 SV=1	PREDICTED: homeobox protein knotted-1-like 13 isoform X2 [Vitis vinifera]
Vad16G001840.1	Cellular Component: integral component of membrane (GO:0016021);;	--	[S]	Function unknown	Putative uncharacterized protein {ECO:0000313|EMBL:CBI26581.3} OS=Vitis vinifera (Grape) PE=4 SV=1	PREDICTED: uncharacterized protein LOC100240785 [Vitis vinifera]
Vad0G006270.1	--	--	--	--	Putative uncharacterized protein {ECO:0000313|EMBL:EAY81384.1} OS=Oryza sativa subsp. indica (Rice) PE=4 SV=1	PREDICTED: uncharacterized protein YhbW-like [Cucumis sativus]
Vad06G000860.1	--	--	--	--	Putative uncharacterized protein {ECO:0000313|EMBL:CBI16491.3} OS=Vitis vinifera (Grape) PE=4 SV=1	PREDICTED: protein YLS3-like [Vitis vinifera]
Vad15G008530.1	Cellular Component: integral component of membrane (GO:0016021);; Molecular Function: oxidoreductase activity (GO:0016491);; Biological Process: oxidation-reduction process (GO:0055114);;	--	[PQ]	--	Putative uncharacterized protein {ECO:0000313|EMBL:CBI40432.3} OS=Vitis vinifera (Grape) PE=4 SV=1	PREDICTED: ferric reduction oxidase 2 isoform X2 [Vitis vinifera]
Vad05G006020.1	Molecular Function: DNA binding (GO:0003677);; Molecular Function: chromatin binding (GO:0003682);;	K09422|1.42985e-152|vvi:100263072|K09422 myb proto-oncogene protein, plant | (RefSeq) protein ODORANT1	[K]	Transcription	Putative uncharacterized protein {ECO:0000313|EMBL:CAN70655.1} OS=Vitis vinifera (Grape) PE=4 SV=1	hypothetical protein VITISV_005696 [Vitis vinifera]
Vad11G007650.1	Molecular Function: magnesium ion binding (GO:0000287);; Molecular Function: phospholipid-translocating ATPase activity (GO:0004012);; Molecular Function: cysteine-type endopeptidase activity (GO:0004197);; Molecular Function: ATP binding (GO:0005524);; Biological Process: proteolysis (GO:0006508);; Biological Process: phospholipid transport (GO:0015914);; Cellular Component: integral component o…	--	--	--	Putative uncharacterized protein {ECO:0000313|EMBL:CCB48246.1} OS=Vitis vinifera (Grape) PE=4 SV=1	hypothetical protein VITISV_040580 [Vitis vinifera]
Vad13G007950.1	Biological Process: proteolysis (GO:0006508);; Molecular Function: cysteine-type peptidase activity (GO:0008234);;	--	--	--	Putative uncharacterized protein {ECO:0000313|EMBL:CBI33540.3} OS=Vitis vinifera (Grape) PE=4 SV=1	PREDICTED: uncharacterized protein LOC104881590 [Vitis vinifera]
Vad16G006190.1	--	--	--	--	Putative uncharacterized protein {ECO:0000313|EMBL:CAN83669.1} OS=Vitis vinifera (Grape) PE=4 SV=1	hypothetical protein VITISV_027696 [Vitis vinifera]
Vad0G010450.1	--	K07277|7.8267e-07|gsl:Gasu_43560|K07277 outer membrane protein insertion porin family | (RefSeq) sorting and assembly machinery component 50	[R]	General function prediction only	Predicted protein {ECO:0000313|EMBL:EDQ48526.1} (Fragment) OS=Physcomitrella patens subsp. patens (Moss) PE=4 SV=1	predicted protein [Physcomitrella patens]
Vad12G000890.1	Molecular Function: calcium ion binding (GO:0005509);; Molecular Function: poly(U) RNA binding (GO:0008266);; Cellular Component: chloroplast thylakoid membrane (GO:0009535);; Cellular Component: chloroplast stroma (GO:0009570);; Cellular Component: photosystem II oxygen evolving complex (GO:0009654);; Cellular Component: chloroplast envelope (GO:0009941);; Biological Process: photosynthesis (GO:…	K02717|1.60372e-115|vvi:100262649|K02717 photosystem II oxygen-evolving enhancer protein 2 | (RefSeq) PSBP1, VvpsbP1; probable oxygen-evolving enhancer protein 2	--	--	Putative uncharacterized protein {ECO:0000313|EMBL:CAN60827.1} OS=Vitis vinifera (Grape) PE=4 SV=1	PREDICTED: oxygen-evolving enhancer protein 2, chloroplastic isoform X1 [Vitis vinifera]
Vad10G000160.1	--	--	--	--	Putative uncharacterized protein {ECO:0000313|EMBL:CBI23166.3} OS=Vitis vinifera (Grape) PE=4 SV=1	PREDICTED: uncharacterized protein LOC104880450 isoform X2 [Vitis vinifera]
Vad09G009220.1	Biological Process: regulation of cell growth by extracellular stimulus (GO:0001560);; Cellular Component: peroxisome (GO:0005777);; Cellular Component: cytosol (GO:0005829);; Biological Process: purine nucleobase metabolic process (GO:0006144);; Biological Process: N-terminal protein myristoylation (GO:0006499);; Biological Process: transport (GO:0006810);; Biological Process: systemic acquired …	K13484|0|vvi:100243214|K13484 5-hydroxyisourate hydrolase / 2-oxo-4-hydroxy-4-carboxy-5-ureidoimidazoline decarboxylase [EC:3.5.2.17 4.1.1.97] | (RefSeq) uric acid degradation bifunctional protein TTL	[I]	Lipid transport and metabolism	5-hydroxyisourate hydrolase {ECO:0000256|RuleBase:RU004307} OS=Vitis vinifera (Grape) PE=3 SV=1	PREDICTED: uric acid degradation bifunctional protein TTL isoform X1 [Vitis vinifera]
Vad02G009890.1	Molecular Function: aspartic-type endopeptidase activity (GO:0004190);; Biological Process: proteolysis (GO:0006508);;	--	[O]	Posttranslational modification, protein turnover, chaperones	Putative uncharacterized protein {ECO:0000313|EMBL:CCB52250.1} OS=Vitis vinifera (Grape) PE=4 SV=1	PREDICTED: aspartic proteinase CDR1 [Vitis vinifera]
Vad0G003040.1	--	--	[O]	Posttranslational modification, protein turnover, chaperones	Uncharacterized protein {ECO:0000313|EnsemblPlants:TRIUR3_02441-P1} OS=Triticum urartu (Red wild einkorn) PE=4 SV=1	Arginyl-tRNA--protein transferase 1 [Triticum urartu]
Vad03G004850.1	Cellular Component: vacuole (GO:0005773);; Biological Process: cold acclimation (GO:0009631);; Biological Process: response to abscisic acid (GO:0009737);; Biological Process: cellular response to water deprivation (GO:0042631);;	--	--	--	Putative uncharacterized protein {ECO:0000313|EMBL:CBI32530.3} OS=Vitis vinifera (Grape) PE=4 SV=1	PREDICTED: cold-regulated 413 plasma membrane protein 2 [Vitis vinifera]
Vad11G007740.1	Molecular Function: protein serine/threonine kinase activity (GO:0004674);; Molecular Function: ATP binding (GO:0005524);; Biological Process: protein phosphorylation (GO:0006468);; Biological Process: transmembrane receptor protein tyrosine kinase signaling pathway (GO:0007169);; Cellular Component: integral component of membrane (GO:0016021);; Molecular Function: 2-alkenal reductase [NAD(P)] ac…	--	--	--	Putative uncharacterized protein {ECO:0000313|EMBL:CCB59776.1} OS=Vitis vinifera (Grape) PE=3 SV=1	PREDICTED: putative leucine-rich repeat receptor-like serine/threonine-protein kinase At2g24130 [Vitis vinifera]
Vad03G002540.1	Biological Process: cell wall macromolecule catabolic process (GO:0016998);;	--	--	--	Putative uncharacterized protein {ECO:0000313|EMBL:CCB60574.1} OS=Vitis vinifera (Grape) PE=4 SV=1	PREDICTED: lysM domain-containing GPI-anchored protein 2 [Vitis vinifera]
Vad06G005520.1	Molecular Function: phosphatidylinositol phospholipase C activity (GO:0004435);; Molecular Function: obsolete signal transducer activity (GO:0004871);; Molecular Function: calcium ion binding (GO:0005509);; Biological Process: lipid metabolic process (GO:0006629);; Biological Process: intracellular signal transduction (GO:0035556);;	K05857|0|vvi:100267383|K05857 phosphatidylinositol phospholipase C, delta [EC:3.1.4.11] | (RefSeq) phosphoinositide phospholipase C 4	[T]	Signal transduction mechanisms	Phosphoinositide phospholipase C {ECO:0000256|RuleBase:RU361133} OS=Vitis vinifera (Grape) PE=4 SV=1	unnamed protein product [Vitis vinifera]
Vad12G006900.1	Molecular Function: polygalacturonase activity (GO:0004650);; Molecular Function: threonine-tRNA ligase activity (GO:0004829);; Molecular Function: ATP binding (GO:0005524);; Cellular Component: extracellular region (GO:0005576);; Cellular Component: cytoplasm (GO:0005737);; Biological Process: carbohydrate metabolic process (GO:0005975);; Biological Process: threonyl-tRNA aminoacylation (GO:0006…	K01213|1.48999e-30|cic:CICLE_v10017883mg|K01213 galacturan 1,4-alpha-galacturonidase [EC:3.2.1.67] | (RefSeq) hypothetical protein	--	--	Putative uncharacterized protein {ECO:0000313|EMBL:CCB51700.1} OS=Vitis vinifera (Grape) PE=3 SV=1	unnamed protein product [Vitis vinifera]
Vad08G008870.1	Biological Process: sphingolipid biosynthetic process (GO:0030148);; Molecular Function: inositol phosphoceramide synthase activity (GO:0045140);;	--	[S]	Function unknown	Putative uncharacterized protein {ECO:0000313|EMBL:CBI30459.3} OS=Vitis vinifera (Grape) PE=4 SV=1	PREDICTED: phosphatidylinositol:ceramide inositolphosphotransferase 1 [Vitis vinifera]
Vad14G009800.1	--	--	--	--	Putative uncharacterized protein {ECO:0000313|EMBL:CAN66013.1} OS=Vitis vinifera (Grape) PE=4 SV=1	PREDICTED: uncharacterized protein LOC100263446 [Vitis vinifera]
Vad05G003380.1	Molecular Function: calcium-transporting ATPase activity (GO:0005388);; Molecular Function: ATP binding (GO:0005524);; Cellular Component: integral component of membrane (GO:0016021);; Molecular Function: metal ion binding (GO:0046872);; Biological Process: calcium ion transmembrane transport (GO:0070588);;	K01537|0|vvi:100264868|K01537 Ca2+-transporting ATPase [EC:3.6.3.8] | (RefSeq) putative calcium-transporting ATPase 13, plasma membrane-type	[P]	Inorganic ion transport and metabolism	Calcium-transporting ATPase {ECO:0000256|RuleBase:RU361146} OS=Vitis vinifera (Grape) PE=3 SV=1	PREDICTED: putative calcium-transporting ATPase 13, plasma membrane-type [Vitis vinifera]
Vad10G003120.1	Molecular Function: RNA binding (GO:0003723);;	--	[J]	Translation, ribosomal structure and biogenesis	Putative uncharacterized protein {ECO:0000313|EMBL:CAN67257.1} OS=Vitis vinifera (Grape) PE=4 SV=1	PREDICTED: putative pumilio homolog 7, chloroplastic [Vitis vinifera]
Vad12G004240.1	--	--	[V]	Defense mechanisms	Putative uncharacterized protein {ECO:0000313|EMBL:CBI28836.3} OS=Vitis vinifera (Grape) PE=4 SV=1	PREDICTED: uncharacterized protein LOC100256881 [Vitis vinifera]
Vad09G000330.1	Biological Process: lipid metabolic process (GO:0006629);; Biological Process: defense response (GO:0006952);; Biological Process: response to hormone (GO:0009725);; Molecular Function: lipase activity (GO:0016298);; Biological Process: response to other organism (GO:0051707);;	--	--	--	Putative uncharacterized protein {ECO:0000313|EMBL:CBI35808.3} OS=Vitis vinifera (Grape) PE=4 SV=1	unnamed protein product [Vitis vinifera]
Vad06G007630.1	Molecular Function: protein serine/threonine kinase activity (GO:0004674);; Molecular Function: ATP binding (GO:0005524);; Biological Process: protein phosphorylation (GO:0006468);;	K08857|0|vvi:100258125|K08857 NIMA (never in mitosis gene a)-related kinase 1/4/5 [EC:2.7.11.1] | (RefSeq) serine/threonine-protein kinase Nek5	[R]	General function prediction only	Putative uncharacterized protein {ECO:0000313|EMBL:CCB49194.1} OS=Vitis vinifera (Grape) PE=4 SV=1	PREDICTED: serine/threonine-protein kinase Nek5 [Vitis vinifera]
Vad04G002660.1	Molecular Function: protein serine/threonine kinase activity (GO:0004674);; Molecular Function: non-membrane spanning protein tyrosine kinase activity (GO:0004715);; Molecular Function: ATP binding (GO:0005524);; Biological Process: protein phosphorylation (GO:0006468);; Biological Process: response to stress (GO:0006950);;	--	--	--	Putative uncharacterized protein {ECO:0000313|EMBL:CCB46670.1} OS=Vitis vinifera (Grape) PE=4 SV=1	PREDICTED: LOW QUALITY PROTEIN: U-box domain-containing protein 52 [Vitis vinifera]
Vad14G013360.1	--	--	--	--	Putative uncharacterized protein {ECO:0000313|EMBL:CCB58591.1} OS=Vitis vinifera (Grape) PE=4 SV=1	PREDICTED: uncharacterized protein LOC100267969 [Vitis vinifera]
Vad05G006230.1	Molecular Function: motor activity (GO:0003774);; Molecular Function: actin binding (GO:0003779);; Molecular Function: ATP binding (GO:0005524);; Cellular Component: peroxisome (GO:0005777);; Cellular Component: myosin complex (GO:0016459);; Molecular Function: Rab GTPase binding (GO:0017137);; Molecular Function: GTP-dependent protein binding (GO:0030742);; Biological Process: root hair elongati…	K10357|0|vvi:100259730|K10357 myosin V | (RefSeq) myosin-6	[Z]	Cytoskeleton	Putative uncharacterized protein {ECO:0000313|EMBL:CCB57489.1} OS=Vitis vinifera (Grape) PE=4 SV=1	PREDICTED: myosin-6-like isoform X2 [Vitis vinifera]
Vad0G009610.1	--	K01501|2.23606e-15|ath:AT3G44320|K01501 nitrilase [EC:3.5.5.1] | (RefSeq) NIT3; nitrilase 3	[E]	Amino acid transport and metabolism	Nitrilase 3 {ECO:0000313|EMBL:AAM65056.1} OS=Arabidopsis thaliana (Mouse-ear cress) PE=2 SV=1	hypothetical protein SNOG_06401 [Phaeosphaeria nodorum SN15]
Vad03G010560.1	--	--	--	--	Putative uncharacterized protein {ECO:0000313|EMBL:CBI38538.3} OS=Vitis vinifera (Grape) PE=4 SV=1	unnamed protein product [Vitis vinifera]
Vad14G010210.1	--	--	[R]	General function prediction only	Putative uncharacterized protein {ECO:0000313|EMBL:CAN78140.1} OS=Vitis vinifera (Grape) PE=4 SV=1	hypothetical protein VITISV_019846 [Vitis vinifera]
Vad11G010180.1	Molecular Function: RNA binding (GO:0003723);; Molecular Function: RNA-directed DNA polymerase activity (GO:0003964);; Molecular Function: protein serine/threonine kinase activity (GO:0004674);; Molecular Function: ATP binding (GO:0005524);; Biological Process: RNA-dependent DNA biosynthetic process (GO:0006278);; Biological Process: protein phosphorylation (GO:0006468);;	--	--	--	Putative uncharacterized protein {ECO:0000313|EMBL:CCB44609.1} OS=Vitis vinifera (Grape) PE=4 SV=1	PREDICTED: uncharacterized protein LOC100266729 isoform X1 [Vitis vinifera]
Vad14G011060.1	Molecular Function: metalloendopeptidase activity (GO:0004222);;	K18156|1.35448e-135|vvi:100244091|K18156 mitochondrial inner membrane protease ATP23 [EC:3.4.24.-] | (RefSeq) mitochondrial inner membrane protease ATP23 homolog	[L]	Replication, recombination and repair	Putative uncharacterized protein {ECO:0000313|EMBL:CBI17714.3} OS=Vitis vinifera (Grape) PE=4 SV=1	PREDICTED: mitochondrial inner membrane protease ATP23 homolog [Vitis vinifera]
Vad13G009570.1	Biological Process: defense response (GO:0006952);; Molecular Function: ADP binding (GO:0043531);;	--	[T]	Signal transduction mechanisms	Putative uncharacterized protein {ECO:0000313|EMBL:CBI24947.3} OS=Vitis vinifera (Grape) PE=4 SV=1	unnamed protein product [Vitis vinifera]
Vad0G004170.1	Molecular Function: transferase activity (GO:0016740);; Molecular Function: ligase activity (GO:0016874);;	K03438|1.53669e-14|mis:MICPUN_84414|K03438 16S rRNA (cytosine1402-N4)-methyltransferase [EC:2.1.1.199] | (RefSeq) hypothetical protein	[R]	General function prediction only	S-adenosyl-methyltransferase MraW {ECO:0000313|EMBL:CBJ32330.1} OS=Ectocarpus siliculosus (Brown alga) PE=3 SV=1	S-adenosyl-methyltransferase MraW [Ectocarpus siliculosus]
Vad13G009840.1	--	--	--	--	Putative uncharacterized protein {ECO:0000313|EMBL:CCB51815.1} OS=Vitis vinifera (Grape) PE=4 SV=1	PREDICTED: protein BPS1, chloroplastic-like [Vitis vinifera]
Vad19G004840.1	--	--	[O]	Posttranslational modification, protein turnover, chaperones	Putative uncharacterized protein {ECO:0000313|EMBL:CCB50659.1} OS=Vitis vinifera (Grape) PE=4 SV=1	PREDICTED: NEP1-interacting protein-like 1 [Vitis vinifera]
Vad01G004530.1	Molecular Function: DNA binding (GO:0003677);; Molecular Function: chromatin binding (GO:0003682);;	K09422|3.23763e-164|vvi:100233136|K09422 myb proto-oncogene protein, plant | (RefSeq) MYBC2-L1; R2R3 Myb transcription factor C2 repressor motif protein	[K]	Transcription	Putative uncharacterized protein {ECO:0000313|EMBL:CBI26917.3} OS=Vitis vinifera (Grape) PE=4 SV=1	unnamed protein product [Vitis vinifera]
Vad0G007760.1	--	--	--	--	C4-dicarboxylate transport transcriptional regulatory protein dctD, putative {ECO:0000313|EMBL:EEF24524.1} (Fragment) OS=Ricinus communis (Castor bean) PE=4 SV=1	Transcriptional regulatory protein QseF [Beauveria bassiana D1-5]
Vad07G008920.1	Biological Process: protein folding (GO:0006457);; Biological Process: response to heat (GO:0009408);; Biological Process: response to high light intensity (GO:0009644);; Biological Process: response to hydrogen peroxide (GO:0042542);;	--	--	--	Putative uncharacterized protein {ECO:0000313|EMBL:CCB57258.1} OS=Vitis vinifera (Grape) PE=4 SV=1	PREDICTED: uncharacterized protein LOC100855061 isoform X1 [Vitis vinifera]
Vad10G000190.1	Cellular Component: endoplasmic reticulum (GO:0005783);; Biological Process: protein folding (GO:0006457);; Biological Process: endoplasmic reticulum unfolded protein response (GO:0030968);; Molecular Function: heat shock protein binding (GO:0031072);; Molecular Function: unfolded protein binding (GO:0051082);;	K19371|0|vvi:100241937|K19371 DnaJ homolog subfamily C member 25 | (RefSeq) chaperone protein dnaJ 50	[O]	Posttranslational modification, protein turnover, chaperones	Putative uncharacterized protein {ECO:0000313|EMBL:CBI23169.3} OS=Vitis vinifera (Grape) PE=4 SV=1	PREDICTED: chaperone protein dnaJ 50 [Vitis vinifera]
Vad0G029290.1	Cellular Component: membrane (GO:0016020);;	--	--	--	Putative uncharacterized protein {ECO:0000313|EMBL:EEC77111.1} OS=Oryza sativa subsp. indica (Rice) PE=4 SV=1	hypothetical protein SMAC_09846 [Sordaria macrospora k-hell]
Vad06G001630.1	Molecular Function: protein serine/threonine kinase activity (GO:0004674);; Molecular Function: ATP binding (GO:0005524);; Biological Process: protein phosphorylation (GO:0006468);; Biological Process: cell adhesion (GO:0007155);; Molecular Function: zinc ion binding (GO:0008270);; Cellular Component: endosome membrane (GO:0010008);; Biological Process: meristem initiation (GO:0010014);; Biologic…	--	[T]	Signal transduction mechanisms	Putative uncharacterized protein {ECO:0000313|EMBL:CBI16334.3} OS=Vitis vinifera (Grape) PE=3 SV=1	PREDICTED: receptor-like serine/threonine-protein kinase NCRK [Vitis vinifera]
Vad04G012580.1	Biological Process: respiratory burst involved in defense response (GO:0002679);; Molecular Function: zinc ion binding (GO:0008270);; Biological Process: intracellular signal transduction (GO:0035556);;	--	[O]	Posttranslational modification, protein turnover, chaperones	Putative uncharacterized protein {ECO:0000313|EMBL:CBI24445.3} OS=Vitis vinifera (Grape) PE=4 SV=1	PREDICTED: NEP1-interacting protein-like 1 [Vitis vinifera]
Vad15G007370.1	Molecular Function: diacylglycerol O-acyltransferase activity (GO:0004144);;	--	--	--	Putative uncharacterized protein {ECO:0000313|EMBL:CBI40537.3} OS=Vitis vinifera (Grape) PE=4 SV=1	unnamed protein product [Vitis vinifera]
Vad13G000210.1	Cellular Component: integral component of membrane (GO:0016021);; Biological Process: vesicle-mediated transport (GO:0016192);; Molecular Function: histone-lysine N-methyltransferase activity (GO:0018024);; Biological Process: histone lysine methylation (GO:0034968);;	--	--	--	Putative uncharacterized protein {ECO:0000313|EMBL:CCB49882.1} OS=Vitis vinifera (Grape) PE=4 SV=1	PREDICTED: uncharacterized protein LOC100245015 isoform X2 [Vitis vinifera]
Vad07G001320.1	--	--	--	--	Putative uncharacterized protein {ECO:0000313|EMBL:CCB51891.1} OS=Vitis vinifera (Grape) PE=4 SV=1	PREDICTED: uncharacterized protein LOC100853449 [Vitis vinifera]
Vad11G008810.1	Molecular Function: DNA binding (GO:0003677);; Molecular Function: DNA-binding transcription factor activity (GO:0003700);; Molecular Function: RNA binding (GO:0003723);; Biological Process: regulation of transcription, DNA-templated (GO:0006355);; Molecular Function: protein dimerization activity (GO:0046983);;	--	--	--	Putative uncharacterized protein {ECO:0000313|EMBL:CBI17910.3} OS=Vitis vinifera (Grape) PE=4 SV=1	PREDICTED: transcription factor bHLH35 [Vitis vinifera]
Vad13G002600.1	Molecular Function: nucleotide binding (GO:0000166);; Molecular Function: structural constituent of ribosome (GO:0003735);; Cellular Component: cell wall (GO:0005618);; Cellular Component: nucleolus (GO:0005730);; Biological Process: translation (GO:0006412);; Biological Process: response to oxidative stress (GO:0006979);; Biological Process: response to cold (GO:0009409);; Biological Process: re…	K02893|9.09445e-105|vvi:100254719|K02893 large subunit ribosomal protein L23Ae | (RefSeq) 60S ribosomal protein L23a	[J]	Translation, ribosomal structure and biogenesis	Putative uncharacterized protein {ECO:0000313|EMBL:CCB56384.1} OS=Vitis vinifera (Grape) PE=3 SV=1	PREDICTED: 60S ribosomal protein L23a [Vitis vinifera]
Vad15G008970.1	--	--	[R]	General function prediction only	Putative uncharacterized protein {ECO:0000313|EMBL:CCB62438.1} OS=Vitis vinifera (Grape) PE=4 SV=1	PREDICTED: uncharacterized protein LOC100244782 [Vitis vinifera]
Vad07G013110.1	--	--	--	--	Putative uncharacterized protein {ECO:0000313|EMBL:CCB45252.1} OS=Vitis vinifera (Grape) PE=4 SV=1	--
Vad0G008310.1	Molecular Function: catalytic activity (GO:0003824);;	K16055|1.29563e-39|ota:Ot01g02410|K16055 trehalose 6-phosphate synthase/phosphatase [EC:2.4.1.15 3.1.3.12] | (RefSeq) SL-TPS/P (ISS)	[G]	Carbohydrate transport and metabolism	Alpha,alpha-trehalose-phosphate synthase {ECO:0000313|EMBL:CAL50152.1} OS=Ostreococcus tauri PE=4 SV=1	SL-TPS/P (ISS) [Ostreococcus tauri]
Vad09G011380.1	Biological Process: pentacyclic triterpenoid biosynthetic process (GO:0019745);; Molecular Function: beta-amyrin synthase activity (GO:0042300);;	K15813|0|vvi:100252187|K15813 beta-amyrin synthase [EC:5.4.99.39] | (RefSeq) beta-amyrin synthase	[I]	Lipid transport and metabolism	Putative uncharacterized protein {ECO:0000313|EMBL:CCB45028.1} OS=Vitis vinifera (Grape) PE=4 SV=1	PREDICTED: beta-amyrin synthase-like [Vitis vinifera]
Vad13G002540.1	--	--	--	--	Putative uncharacterized protein {ECO:0000313|EMBL:CAN66272.1} OS=Vitis vinifera (Grape) PE=4 SV=1	hypothetical protein VITISV_018033 [Vitis vinifera]
Vad06G005160.1	Molecular Function: DNA binding (GO:0003677);; Molecular Function: chromatin binding (GO:0003682);;	K09422|0|vvi:104879608|K09422 myb proto-oncogene protein, plant | (RefSeq) myb-related protein Myb4	[K]	Transcription	Putative uncharacterized protein {ECO:0000313|EMBL:CBI15983.3} OS=Vitis vinifera (Grape) PE=4 SV=1	PREDICTED: myb-related protein Myb4 [Vitis vinifera]
Vad15G002460.1	Biological Process: Group II intron splicing (GO:0000373);; Molecular Function: RNA binding (GO:0003723);; Molecular Function: zinc ion binding (GO:0008270);; Biological Process: chloroplast organization (GO:0009658);; Biological Process: regulation of gene expression (GO:0010468);; Biological Process: photosynthesis (GO:0015979);;	--	--	--	Putative uncharacterized protein {ECO:0000313|EMBL:CBI16741.3} OS=Vitis vinifera (Grape) PE=4 SV=1	PREDICTED: APO protein 1, chloroplastic isoform X2 [Vitis vinifera]
Vad02G005050.1	Molecular Function: catalytic activity (GO:0003824);; Biological Process: metabolic process (GO:0008152);;	K19367|0|vvi:100249980|K19367 maspardin | (RefSeq) maspardin	--	--	Putative uncharacterized protein {ECO:0000313|EMBL:CBI22154.3} OS=Vitis vinifera (Grape) PE=4 SV=1	unnamed protein product [Vitis vinifera]
Vad07G011070.1	--	--	--	--	Putative uncharacterized protein {ECO:0000313|EMBL:CBI23487.3} OS=Vitis vinifera (Grape) PE=4 SV=1	unnamed protein product [Vitis vinifera]
Vad05G012560.1	--	K15202|0|vvi:100247425|K15202 general transcription factor 3C polypeptide 5 (transcription factor C subunit 1) | (RefSeq) uncharacterized LOC100247425	[K]	Transcription	Putative uncharacterized protein {ECO:0000313|EMBL:CCB49427.1} OS=Vitis vinifera (Grape) PE=4 SV=1	PREDICTED: uncharacterized protein LOC100247425 [Vitis vinifera]
Vad03G010320.1	Molecular Function: beta-ureidopropionase activity (GO:0003837);; Cellular Component: cytosol (GO:0005829);; Biological Process: uracil catabolic process (GO:0006212);;	K01431|0|vvi:100246992|K01431 beta-ureidopropionase [EC:3.5.1.6] | (RefSeq) beta-ureidopropionase	[E]	Amino acid transport and metabolism	Putative uncharacterized protein {ECO:0000313|EMBL:CBI34020.3} OS=Vitis vinifera (Grape) PE=4 SV=1	PREDICTED: beta-ureidopropionase [Vitis vinifera]
Vad18G019530.1	Molecular Function: nucleic acid binding (GO:0003676);; Cellular Component: nucleus (GO:0005634);; Biological Process: intracellular protein transport (GO:0006886);; Molecular Function: zinc ion binding (GO:0008270);; Molecular Function: Ran GTPase binding (GO:0008536);; Biological Process: DNA integration (GO:0015074);;	K14290|3.58123e-24|vvi:100256288|K14290 exportin-1 | (RefSeq) protein EXPORTIN 1A	[YU]	--	Putative uncharacterized protein {ECO:0000313|EMBL:CCB49145.1} OS=Vitis vinifera (Grape) PE=4 SV=1	hypothetical protein VITISV_005059 [Vitis vinifera]
Vad13G006240.1	--	--	--	--	Putative uncharacterized protein {ECO:0000313|EMBL:CCB56143.1} OS=Vitis vinifera (Grape) PE=4 SV=1	PREDICTED: uncharacterized membrane protein YMR155W-like [Vitis vinifera]
Vad17G005660.1	Molecular Function: lactoylglutathione lyase activity (GO:0004462);; Molecular Function: transferase activity (GO:0016740);;	K00799|5.28834e-164|vvi:100243397|K00799 glutathione S-transferase [EC:2.5.1.18] | (RefSeq) glutathione S-transferase U9-like	[O]	Posttranslational modification, protein turnover, chaperones	Putative uncharacterized protein {ECO:0000313|EMBL:CCB43095.1} OS=Vitis vinifera (Grape) PE=4 SV=1	PREDICTED: glutathione S-transferase U9-like [Vitis vinifera]
Vad18G012220.1	Molecular Function: copper ion binding (GO:0005507);; Cellular Component: plasma membrane (GO:0005886);; Biological Process: photomorphogenesis (GO:0009640);; Biological Process: response to abscisic acid (GO:0009737);; Biological Process: embryo development ending in seed dormancy (GO:0009793);; Biological Process: seed germination (GO:0009845);; Biological Process: pollination (GO:0009856);; Bi…	--	--	--	Putative uncharacterized protein {ECO:0000313|EMBL:CBI19945.3} OS=Vitis vinifera (Grape) PE=4 SV=1	PREDICTED: basic blue protein [Vitis vinifera]
Vad14G000360.1	--	--	[R]	General function prediction only	Putative uncharacterized protein {ECO:0000313|EMBL:CCB61959.1} OS=Vitis vinifera (Grape) PE=4 SV=1	PREDICTED: pentatricopeptide repeat-containing protein At3g53700, chloroplastic-like [Vitis vinifera]
Vad11G000300.1	Biological Process: response to auxin (GO:0009733);;	--	--	--	Putative uncharacterized protein {ECO:0000313|EMBL:CBI27758.3} OS=Vitis vinifera (Grape) PE=4 SV=1	PREDICTED: uncharacterized protein LOC100244113 [Vitis vinifera]
Vad01G010020.1	Molecular Function: RNA binding (GO:0003723);; Molecular Function: RNA-directed DNA polymerase activity (GO:0003964);; Molecular Function: RNA-DNA hybrid ribonuclease activity (GO:0004523);; Biological Process: RNA-dependent DNA biosynthetic process (GO:0006278);; Biological Process: defense response (GO:0006952);; Biological Process: DNA integration (GO:0015074);; Cellular Component: integral co…	--	--	--	Putative uncharacterized protein {ECO:0000313|EMBL:CCB49351.1} OS=Vitis vinifera (Grape) PE=4 SV=1	hypothetical protein VITISV_008703 [Vitis vinifera]
Vad15G001650.1	Molecular Function: hydrolase activity, acting on ester bonds (GO:0016788);;	K01114|9.58237e-111|vvi:100253773|K01114 phospholipase C [EC:3.1.4.3] | (RefSeq) non-specific phospholipase C4	--	--	Putative uncharacterized protein {ECO:0000313|EMBL:CCB60752.1} OS=Vitis vinifera (Grape) PE=4 SV=1	hypothetical protein VITISV_025817 [Vitis vinifera]
Vad0G003700.1	--	--	--	--	--	Cation efflux system protein CzcA [Beauveria bassiana D1-5]
Vad04G008220.1	Cellular Component: plasma membrane (GO:0005886);; Molecular Function: ammonium transmembrane transporter activity (GO:0008519);; Biological Process: response to nematode (GO:0009624);; Biological Process: methylammonium transport (GO:0015843);; Cellular Component: integral component of membrane (GO:0016021);; Biological Process: ammonium transmembrane transport (GO:0072488);;	K07573|0|vvi:100263947|K07573 exosome complex component CSL4 | (RefSeq) uncharacterized LOC100263947	[P]	Inorganic ion transport and metabolism	Putative uncharacterized protein {ECO:0000313|EMBL:CCB51858.1} OS=Vitis vinifera (Grape) PE=4 SV=1	PREDICTED: uncharacterized protein LOC100263947 [Vitis vinifera]
Vad13G003970.1	--	--	--	--	Putative uncharacterized protein {ECO:0000313|EMBL:CCB56308.1} OS=Vitis vinifera (Grape) PE=4 SV=1	--
Vad17G005200.1	Cellular Component: chloroplast thylakoid membrane (GO:0009535);; Biological Process: cellular cation homeostasis (GO:0030003);; Biological Process: divalent metal ion transport (GO:0070838);;	--	--	--	Putative uncharacterized protein {ECO:0000313|EMBL:CAN62049.1} OS=Vitis vinifera (Grape) PE=4 SV=1	PREDICTED: uncharacterized protein LOC100250168 [Vitis vinifera]
Vad03G001770.1	Biological Process: microtubule cytoskeleton organization (GO:0000226);; Molecular Function: sphingomyelin phosphodiesterase activity (GO:0004767);; Molecular Function: GTP binding (GO:0005525);; Cellular Component: nucleolus (GO:0005730);; Cellular Component: plasma membrane (GO:0005886);; Biological Process: small GTPase mediated signal transduction (GO:0007264);; Biological Process: response t…	K04392|4.81113e-145|vvi:100253703|K04392 Ras-related C3 botulinum toxin substrate 1 | (RefSeq) rac-like GTP-binding protein RAC1	[R]	General function prediction only	Putative uncharacterized protein {ECO:0000313|EMBL:CAN73627.1} OS=Vitis vinifera (Grape) PE=3 SV=1	PREDICTED: rac-like GTP-binding protein 5 [Vitis vinifera]
Vad07G003870.1	Molecular Function: hydrolase activity (GO:0016787);;	K01213|0|vvi:100253785|K01213 galacturan 1,4-alpha-galacturonidase [EC:3.2.1.67] | (RefSeq) exopolygalacturonase	--	--	Putative uncharacterized protein {ECO:0000313|EMBL:CCB59981.1} OS=Vitis vinifera (Grape) PE=3 SV=1	PREDICTED: exopolygalacturonase [Vitis vinifera]
Vad02G010380.1	Cellular Component: nucleus (GO:0005634);;	--	[K]	Transcription	Putative uncharacterized protein {ECO:0000313|EMBL:CBI29190.3} OS=Vitis vinifera (Grape) PE=4 SV=1	PREDICTED: upstream activation factor subunit spp27 [Vitis vinifera]
Vad11G009500.1	Molecular Function: ubiquitin-protein transferase activity (GO:0004842);; Cellular Component: cytosol (GO:0005829);; Biological Process: regulation of transcription, DNA-templated (GO:0006355);; Biological Process: fatty acid beta-oxidation (GO:0006635);; Biological Process: blue light signaling pathway (GO:0009785);; Molecular Function: blue light photoreceptor activity (GO:0009882);; Biological…	K12115|9.66739e-44|vvi:100244508|K12115 clock-associated PAS protein ZTL | (RefSeq) adagio protein 1	--	--	Putative uncharacterized protein {ECO:0000313|EMBL:CCB44665.1} OS=Vitis vinifera (Grape) PE=4 SV=1	hypothetical protein VITISV_008337 [Vitis vinifera]
Vad12G009890.1	--	--	[R]	General function prediction only	Putative uncharacterized protein {ECO:0000313|EMBL:CAN60815.1} OS=Vitis vinifera (Grape) PE=4 SV=1	PREDICTED: small glutamine-rich tetratricopeptide repeat-containing protein isoform X1 [Vitis vinifera]
Vad16G007480.1	--	--	--	--	Putative uncharacterized protein {ECO:0000313|EMBL:CCB47823.1} OS=Vitis vinifera (Grape) PE=4 SV=1	PREDICTED: uncharacterized protein LOC104882217 [Vitis vinifera]
Vad10G007290.1	Molecular Function: protein serine/threonine kinase activity (GO:0004674);; Molecular Function: protein tyrosine kinase activity (GO:0004713);; Molecular Function: ATP binding (GO:0005524);; Cellular Component: plasma membrane (GO:0005886);; Biological Process: glycolytic process (GO:0006096);; Biological Process: water transport (GO:0006833);; Biological Process: hyperosmotic response (GO:000697…	K14502|0|vvi:100855030|K14502 protein brassinosteroid insensitive 2 [EC:2.7.11.1] | (RefSeq) shaggy-related protein kinase eta	[G]	Carbohydrate transport and metabolism	Putative uncharacterized protein {ECO:0000313|EMBL:CBI30705.3} OS=Vitis vinifera (Grape) PE=4 SV=1	PREDICTED: shaggy-related protein kinase eta isoform X1 [Vitis vinifera]
Vad12G007070.1	Molecular Function: nucleotide binding (GO:0000166);; Molecular Function: RNA binding (GO:0003723);; Molecular Function: metal ion binding (GO:0046872);;	--	--	--	Putative uncharacterized protein {ECO:0000313|EMBL:CCB51716.1} OS=Vitis vinifera (Grape) PE=4 SV=1	PREDICTED: zinc finger CCCH domain-containing protein 18 isoform X1 [Vitis vinifera]
Vad02G009410.1	Biological Process: G1/S transition of mitotic cell cycle (GO:0000082);; Biological Process: nuclear division (GO:0000280);; Biological Process: cytokinesis by cell plate formation (GO:0000911);; Cellular Component: nucleus (GO:0005634);; Biological Process: regulation of DNA replication (GO:0006275);; Biological Process: response to cytokinin (GO:0009735);; Biological Process: response to brassi…	--	[D]	Cell cycle control, cell division, chromosome partitioning	Putative uncharacterized protein {ECO:0000313|EMBL:CCB50059.1} OS=Vitis vinifera (Grape) PE=3 SV=1	unnamed protein product [Vitis vinifera]
Vad05G007680.1	--	--	--	--	Putative uncharacterized protein {ECO:0000313|EMBL:CBI17261.3} OS=Vitis vinifera (Grape) PE=4 SV=1	unnamed protein product [Vitis vinifera]
Vad07G003170.1	Molecular Function: transferase activity (GO:0016740);;	K00799|1.07483e-155|vvi:100243577|K00799 glutathione S-transferase [EC:2.5.1.18] | (RefSeq) glutathione S-transferase	[O]	Posttranslational modification, protein turnover, chaperones	Putative uncharacterized protein {ECO:0000313|EMBL:CBI36818.3} OS=Vitis vinifera (Grape) PE=3 SV=1	PREDICTED: glutathione S-transferase [Vitis vinifera]
Vad14G008350.1	--	--	--	--	Putative uncharacterized protein {ECO:0000313|EMBL:CCB46924.1} OS=Vitis vinifera (Grape) PE=4 SV=1	unnamed protein product [Vitis vinifera]
Vad0G023160.1	Molecular Function: copper ion binding (GO:0005507);; Molecular Function: electron transfer activity (GO:0009055);;	--	--	--	Putative uncharacterized protein {ECO:0000313|EMBL:CAN66200.1} OS=Vitis vinifera (Grape) PE=4 SV=1	PREDICTED: stellacyanin-like [Vitis vinifera]
Vad07G015270.1	Molecular Function: fatty-acyl-CoA binding (GO:0000062);;	--	[I]	Lipid transport and metabolism	Putative uncharacterized protein {ECO:0000313|EMBL:CCB57759.1} OS=Vitis vinifera (Grape) PE=4 SV=1	PREDICTED: acyl-CoA-binding domain-containing protein 3-like isoform X2 [Vitis vinifera]
Vad12G011160.1	--	--	--	--	Putative uncharacterized protein {ECO:0000313|EMBL:CCB55048.1} OS=Vitis vinifera (Grape) PE=4 SV=1	unnamed protein product [Vitis vinifera]
Vad19G000420.1	Biological Process: transcription, DNA-templated (GO:0006351);; Molecular Function: sequence-specific DNA binding (GO:0043565);;	--	--	--	Putative uncharacterized protein {ECO:0000313|EMBL:CCB46244.1} OS=Vitis vinifera (Grape) PE=4 SV=1	PREDICTED: transcription factor TGA4-like [Vitis vinifera]
Vad08G014610.1	--	--	--	--	Putative uncharacterized protein {ECO:0000313|EMBL:CCB55188.1} OS=Vitis vinifera (Grape) PE=4 SV=1	unnamed protein product [Vitis vinifera]
Vad18G021530.1	Cellular Component: plasma membrane (GO:0005886);; Molecular Function: zinc ion binding (GO:0008270);; Molecular Function: 2-alkenal reductase [NAD(P)] activity (GO:0032440);; Biological Process: oxidation-reduction process (GO:0055114);;	K16675|0|vvi:100264082|K16675 palmitoyltransferase ZDHHC9/14/18 [EC:2.3.1.225] | (RefSeq) protein S-acyltransferase 8	[R]	General function prediction only	S-acyltransferase {ECO:0000256|RuleBase:RU079119} OS=Vitis vinifera (Grape) PE=3 SV=1	PREDICTED: protein S-acyltransferase 8-like [Vitis vinifera]
Vad16G003490.1	--	--	[R]	General function prediction only	Putative uncharacterized protein {ECO:0000313|EMBL:CAN72124.1} OS=Vitis vinifera (Grape) PE=4 SV=1	PREDICTED: receptor-like protein 12 [Vitis vinifera]
Vad05G001620.1	Molecular Function: DNA binding (GO:0003677);; Molecular Function: chromatin binding (GO:0003682);; Biological Process: response to fungus (GO:0009620);; Biological Process: response to salt stress (GO:0009651);; Biological Process: response to ethylene (GO:0009723);; Biological Process: response to abscisic acid (GO:0009737);; Biological Process: response to jasmonic acid (GO:0009753);;	K09422|0|vvi:100248153|K09422 myb proto-oncogene protein, plant | (RefSeq) R2R3 transcription factor MYB108-like protein 1	[K]	Transcription	Putative uncharacterized protein {ECO:0000313|EMBL:CBI22842.3} OS=Vitis vinifera (Grape) PE=4 SV=1	unnamed protein product [Vitis vinifera]
Vad01G007470.1	Cellular Component: integral component of membrane (GO:0016021);;	--	--	--	Putative uncharacterized protein {ECO:0000313|EMBL:CCB51801.1} OS=Vitis vinifera (Grape) PE=4 SV=1	hypothetical protein VITISV_017946 [Vitis vinifera]
Vad11G000540.1	Cellular Component: membrane (GO:0016020);; Molecular Function: kinase activity (GO:0016301);; Biological Process: phosphorylation (GO:0016310);;	K08908|0|vvi:100268126|K08908 light-harvesting complex I chlorophyll a/b binding protein 2 | (RefSeq) photosystem I chlorophyll a/b-binding protein 6, chloroplastic	--	--	Putative uncharacterized protein {ECO:0000313|EMBL:CCB51382.1} OS=Vitis vinifera (Grape) PE=4 SV=1	PREDICTED: probable inactive leucine-rich repeat receptor-like protein kinase At5g20690 [Vitis vinifera]
Vad07G006770.1	--	--	[T]	Signal transduction mechanisms	Putative uncharacterized protein {ECO:0000313|EMBL:CCB60142.1} OS=Vitis vinifera (Grape) PE=4 SV=1	PREDICTED: tetratricopeptide repeat protein 7A [Vitis vinifera]
Vad03G002340.1	Cellular Component: membrane (GO:0016020);; Biological Process: transmembrane transport (GO:0055085);;	--	[M]	Cell wall/membrane/envelope biogenesis	Putative uncharacterized protein {ECO:0000313|EMBL:CCB60588.1} OS=Vitis vinifera (Grape) PE=4 SV=1	PREDICTED: mechanosensitive ion channel protein 6-like [Vitis vinifera]
Vad04G013440.1	Molecular Function: DNA-binding transcription factor activity (GO:0003700);; Cellular Component: nucleus (GO:0005634);; Biological Process: regulation of transcription, DNA-templated (GO:0006355);; Molecular Function: sequence-specific DNA binding (GO:0043565);;	--	--	--	Putative uncharacterized protein {ECO:0000313|EMBL:CBI37640.3} OS=Vitis vinifera (Grape) PE=4 SV=1	PREDICTED: WUSCHEL-related homeobox 13-like [Vitis vinifera]
Vad14G000990.1	Molecular Function: iron ion transmembrane transporter activity (GO:0005381);; Cellular Component: cell wall (GO:0005618);; Cellular Component: integral component of membrane (GO:0016021);; Molecular Function: pectinesterase activity (GO:0030599);; Biological Process: iron ion transmembrane transport (GO:0034755);; Biological Process: cell wall modification (GO:0042545);; Molecular Function: aspa…	--	--	--	Putative uncharacterized protein {ECO:0000313|EMBL:CCB61918.1} OS=Vitis vinifera (Grape) PE=3 SV=1	unnamed protein product [Vitis vinifera]
Vad15G009210.1	--	--	--	--	Putative uncharacterized protein {ECO:0000313|EMBL:CBI40371.3} OS=Vitis vinifera (Grape) PE=4 SV=1	unnamed protein product [Vitis vinifera]
Vad16G007840.1	--	--	--	--	Putative uncharacterized protein {ECO:0000313|EMBL:CCB47801.1} OS=Vitis vinifera (Grape) PE=4 SV=1	PREDICTED: uncharacterized protein LOC104882208 [Vitis vinifera]
Vad18G012010.1	Cellular Component: cytosol (GO:0005829);; Molecular Function: [protein-PII] uridylyltransferase activity (GO:0008773);; Molecular Function: amino acid binding (GO:0016597);; Biological Process: methylglyoxal catabolic process to D-lactate via S-lactoyl-glutathione (GO:0019243);; Biological Process: cysteine biosynthetic process (GO:0019344);;	--	--	--	Putative uncharacterized protein {ECO:0000313|EMBL:CCB46078.1} OS=Vitis vinifera (Grape) PE=4 SV=1	PREDICTED: uncharacterized protein LOC100250578 isoform X2 [Vitis vinifera]
Vad17G007150.1	Molecular Function: coproporphyrinogen oxidase activity (GO:0004109);; Cellular Component: cytoplasm (GO:0005737);; Biological Process: porphyrin-containing compound biosynthetic process (GO:0006779);; Molecular Function: iron-sulfur cluster binding (GO:0051536);; Molecular Function: coproporphyrinogen dehydrogenase activity (GO:0051989);; Biological Process: oxidation-reduction process (GO:00551…	--	--	--	Putative uncharacterized protein {ECO:0000313|EMBL:CCB42894.1} OS=Vitis vinifera (Grape) PE=4 SV=1	PREDICTED: radical S-adenosyl methionine domain-containing protein 1, mitochondrial [Vitis vinifera]
Vad01G005730.1	Cellular Component: endoplasmic reticulum lumen (GO:0005788);; Biological Process: embryo development (GO:0009790);; Biological Process: pollen tube guidance (GO:0010183);; Biological Process: maintenance of protein localization in endoplasmic reticulum (GO:0035437);;	--	[S]	Function unknown	Putative uncharacterized protein {ECO:0000313|EMBL:CBI26801.3} OS=Vitis vinifera (Grape) PE=4 SV=1	PREDICTED: protein POLLEN DEFECTIVE IN GUIDANCE 1 [Vitis vinifera]
Vad09G005250.1	Cellular Component: intracellular (GO:0005622);; Molecular Function: zinc ion binding (GO:0008270);; Biological Process: plant-type cell wall organization (GO:0009664);; Biological Process: cell wall modification (GO:0042545);;	--	[R]	General function prediction only	Putative uncharacterized protein {ECO:0000313|EMBL:CCB59566.1} OS=Vitis vinifera (Grape) PE=4 SV=1	PREDICTED: TATA-binding protein-associated factor 2N [Vitis vinifera]
Vad05G007650.1	--	--	[R]	General function prediction only	Putative uncharacterized protein {ECO:0000313|EMBL:CAN59765.1} OS=Vitis vinifera (Grape) PE=4 SV=1	PREDICTED: LRR receptor-like serine/threonine-protein kinase GSO2 [Vitis vinifera]
Vad18G020030.1	--	--	--	--	Putative uncharacterized protein {ECO:0000313|EMBL:CCB61750.1} OS=Vitis vinifera (Grape) PE=4 SV=1	PREDICTED: developmental gene 1062 protein-like [Vitis vinifera]
Vad0G012960.1	Molecular Function: binding (GO:0005488);;	--	--	--	Putative uncharacterized protein {ECO:0000313|EMBL:CCB62170.1} OS=Vitis vinifera (Grape) PE=4 SV=1	unnamed protein product [Vitis vinifera]
Vad13G003950.1	Molecular Function: nucleotide binding (GO:0000166);; Biological Process: formation of translation preinitiation complex (GO:0001731);; Molecular Function: translation initiation factor activity (GO:0003743);; Cellular Component: eukaryotic translation initiation factor 3 complex (GO:0005852);; Cellular Component: plasma membrane (GO:0005886);; Biological Process: regulation of translational init…	K03248|1.41331e-128|vvi:100251333|K03248 translation initiation factor 3 subunit G | (RefSeq) eukaryotic translation initiation factor 3 subunit G	[J]	Translation, ribosomal structure and biogenesis	Eukaryotic translation initiation factor 3 subunit G {ECO:0000256|HAMAP-Rule:MF_03006} OS=Vitis vinifera (Grape) PE=3 SV=1	PREDICTED: eukaryotic translation initiation factor 3 subunit G [Vitis vinifera]
Vad13G002080.1	Molecular Function: protein serine/threonine kinase activity (GO:0004674);; Molecular Function: non-membrane spanning protein tyrosine kinase activity (GO:0004715);; Molecular Function: ATP binding (GO:0005524);; Biological Process: protein phosphorylation (GO:0006468);;	--	[T]	Signal transduction mechanisms	Protein kinase-like protein {ECO:0000313|EMBL:AAQ96340.1} OS=Vitis aestivalis (Grape) PE=2 SV=1	protein kinase-like protein [Vitis aestivalis]
Vad04G008580.1	Cellular Component: ubiquitin ligase complex (GO:0000151);; Molecular Function: ubiquitin-protein transferase activity (GO:0004842);; Biological Process: protein ubiquitination (GO:0016567);;	--	[S]	Function unknown	Putative uncharacterized protein {ECO:0000313|EMBL:CBI28670.3} OS=Vitis vinifera (Grape) PE=4 SV=1	PREDICTED: U-box domain-containing protein 9 [Vitis vinifera]
Vad17G000660.1	--	--	--	--	Putative uncharacterized protein {ECO:0000313|EMBL:CCB43345.1} OS=Vitis vinifera (Grape) PE=4 SV=1	PREDICTED: uncharacterized protein LOC100267986 [Vitis vinifera]
Vad19G002110.1	--	--	--	--	Putative uncharacterized protein {ECO:0000313|EMBL:CCB44708.1} OS=Vitis vinifera (Grape) PE=4 SV=1	hypothetical protein VITISV_042492 [Vitis vinifera]
Vad15G003150.1	Molecular Function: copper ion binding (GO:0005507);; Molecular Function: electron transfer activity (GO:0009055);;	--	--	--	Putative uncharacterized protein {ECO:0000313|EMBL:CBI16675.3} OS=Vitis vinifera (Grape) PE=4 SV=1	PREDICTED: uclacyanin-3 [Vitis vinifera]
Vad03G007210.1	Biological Process: amino acid transmembrane transport (GO:0003333);; Molecular Function: polyamine transmembrane transporter activity (GO:0015203);; Molecular Function: basic amino acid transmembrane transporter activity (GO:0015326);; Biological Process: chlorophyll catabolic process (GO:0015996);; Cellular Component: integral component of membrane (GO:0016021);; Biological Process: polyamine t…	--	[E]	Amino acid transport and metabolism	Putative uncharacterized protein {ECO:0000313|EMBL:CCB47711.1} OS=Vitis vinifera (Grape) PE=4 SV=1	PREDICTED: probable polyamine transporter At3g19553 [Vitis vinifera]
Vad10G005480.1	--	--	--	--	Putative uncharacterized protein {ECO:0000313|EMBL:CBI41052.3} OS=Vitis vinifera (Grape) PE=4 SV=1	PREDICTED: stem-specific protein TSJT1 [Vitis vinifera]
Vad0G002890.1	--	--	--	--	--	Ferredoxin 1 [Beauveria bassiana D1-5]
Vad19G002240.1	Cellular Component: chloroplast thylakoid membrane (GO:0009535);; Biological Process: response to ethylene (GO:0009723);; Cellular Component: chloroplast envelope (GO:0009941);; Molecular Function: protochlorophyllide reductase activity (GO:0016630);; Biological Process: oxidation-reduction process (GO:0055114);;	K00218|0|vvi:100255647|K00218 protochlorophyllide reductase [EC:1.3.1.33] | (RefSeq) protochlorophyllide reductase, chloroplastic	[Q]	Secondary metabolites biosynthesis, transport and catabolism	Putative uncharacterized protein {ECO:0000313|EMBL:CBI20339.3} OS=Vitis vinifera (Grape) PE=4 SV=1	PREDICTED: protochlorophyllide reductase, chloroplastic [Vitis vinifera]
Vad10G007000.1	Biological Process: DNA-templated transcription, initiation (GO:0006352);; Biological Process: regulation of transcription, DNA-templated (GO:0006355);; Molecular Function: zinc ion binding (GO:0008270);;	K15196|0|vvi:100261683|K15196 transcription factor IIIB 90 kDa subunit | (RefSeq) plant-specific TFIIB-related protein PTF2	[K]	Transcription	Putative uncharacterized protein {ECO:0000313|EMBL:CBI30678.3} OS=Vitis vinifera (Grape) PE=4 SV=1	PREDICTED: transcription factor IIIB 50 kDa subunit [Vitis vinifera]
Vad0G005200.1	--	--	--	--	Uncharacterized protein {ECO:0000313|EMBL:EQC36876.1} OS=Saprolegnia diclina VS20 PE=4 SV=1	hypothetical protein SDRG_05706 [Saprolegnia diclina VS20]
Vad11G009020.1	Molecular Function: calcium-transporting ATPase activity (GO:0005388);; Molecular Function: calmodulin binding (GO:0005516);; Molecular Function: ATP binding (GO:0005524);; Cellular Component: integral component of membrane (GO:0016021);; Molecular Function: metal ion binding (GO:0046872);; Biological Process: calcium ion transmembrane transport (GO:0070588);;	K01537|0|vvi:100251227|K01537 Ca2+-transporting ATPase [EC:3.6.3.8] | (RefSeq) calcium-transporting ATPase 10, plasma membrane-type	[P]	Inorganic ion transport and metabolism	Calcium-transporting ATPase {ECO:0000256|RuleBase:RU361146} OS=Vitis vinifera (Grape) PE=3 SV=1	PREDICTED: calcium-transporting ATPase 10, plasma membrane-type [Vitis vinifera]
Vad10G011740.1	Molecular Function: protein serine/threonine kinase activity (GO:0004674);; Molecular Function: ATP binding (GO:0005524);; Biological Process: protein phosphorylation (GO:0006468);;	--	--	--	Putative uncharacterized protein {ECO:0000313|EMBL:CBI39029.3} OS=Vitis vinifera (Grape) PE=4 SV=1	unnamed protein product [Vitis vinifera]
Vad0G011710.1	--	--	--	--	Putative uncharacterized protein {ECO:0000313|EMBL:CCB43783.1} OS=Vitis vinifera (Grape) PE=4 SV=1	PREDICTED: dirigent protein 22-like [Vitis vinifera]
Vad18G003990.1	Biological Process: carbohydrate metabolic process (GO:0005975);; Molecular Function: beta-glucosidase activity (GO:0008422);; Cellular Component: plant-type cell wall (GO:0009505);; Cellular Component: chloroplast (GO:0009507);; Cellular Component: apoplast (GO:0048046);;	--	--	--	Putative uncharacterized protein {ECO:0000313|EMBL:CCB45555.1} OS=Vitis vinifera (Grape) PE=4 SV=1	PREDICTED: probable beta-D-xylosidase 7 [Vitis vinifera]
Vad06G009170.1	--	--	--	--	Uncharacterized protein {ECO:0000313|EMBL:ESW34062.1} OS=Phaseolus vulgaris (Kidney bean) PE=4 SV=1	PREDICTED: CLAVATA3/ESR (CLE)-related protein 22 [Vitis vinifera]
Vad01G004420.1	--	--	--	--	Putative uncharacterized protein {ECO:0000313|EMBL:CCB50846.1} OS=Vitis vinifera (Grape) PE=4 SV=1	PREDICTED: uncharacterized protein LOC100242324 [Vitis vinifera]
Vad08G007580.1	Biological Process: transport (GO:0044765);;	--	[P]	Inorganic ion transport and metabolism	Putative uncharacterized protein {ECO:0000313|EMBL:CCB55610.1} OS=Vitis vinifera (Grape) PE=4 SV=1	PREDICTED: cation/H(+) antiporter 20 [Vitis vinifera]
Vad02G010030.1	--	--	--	--	Putative uncharacterized protein {ECO:0000313|EMBL:CBI33586.3} OS=Vitis vinifera (Grape) PE=4 SV=1	unnamed protein product [Vitis vinifera]
Vad13G013900.1	--	--	--	--	Putative uncharacterized protein {ECO:0000313|EMBL:CBI25803.3} OS=Vitis vinifera (Grape) PE=4 SV=1	unnamed protein product [Vitis vinifera]
Vad13G011120.1	--	--	[D]	Cell cycle control, cell division, chromosome partitioning	Putative uncharacterized protein {ECO:0000313|EMBL:CBI24887.3} OS=Vitis vinifera (Grape) PE=4 SV=1	unnamed protein product [Vitis vinifera]
Vad06G012440.1	Molecular Function: oxidoreductase activity (GO:0016491);; Biological Process: oxidation-reduction process (GO:0055114);;	--	[R]	General function prediction only	Putative uncharacterized protein {ECO:0000313|EMBL:CCB51626.1} OS=Vitis vinifera (Grape) PE=3 SV=1	unnamed protein product [Vitis vinifera]
Vad15G006350.1	Cellular Component: mitochondrion (GO:0005739);; Cellular Component: Golgi apparatus (GO:0005794);; Cellular Component: cytosol (GO:0005829);; Biological Process: membrane fusion (GO:0006944);; Biological Process: Golgi vesicle transport (GO:0048193);;	K20291|0|vvi:100259252|K20291 conserved oligomeric Golgi complex subunit 4 | (RefSeq) conserved oligomeric Golgi complex subunit 4	[U]	Intracellular trafficking, secretion, and vesicular transport	Putative uncharacterized protein {ECO:0000313|EMBL:CCB61299.1} OS=Vitis vinifera (Grape) PE=4 SV=1	PREDICTED: LOW QUALITY PROTEIN: conserved oligomeric Golgi complex subunit 4 [Vitis vinifera]
Vad04G008120.1	--	K07562|0|vvi:100245020|K07562 nonsense-mediated mRNA decay protein 3 | (RefSeq) 60S ribosomal export protein NMD3	[J]	Translation, ribosomal structure and biogenesis	Putative uncharacterized protein {ECO:0000313|EMBL:CCB51850.1} OS=Vitis vinifera (Grape) PE=4 SV=1	PREDICTED: 60S ribosomal export protein NMD3 [Vitis vinifera]
Vad13G009100.1	Molecular Function: DNA binding (GO:0003677);; Molecular Function: DNA-directed 5'-3' RNA polymerase activity (GO:0003899);; Cellular Component: nucleus (GO:0005634);; Biological Process: transcription, DNA-templated (GO:0006351);;	K03013|1.92666e-159|vvi:100258335|K03013 DNA-directed RNA polymerases I, II, and III subunit RPABC1 | (RefSeq) DNA-directed RNA polymerase V subunit 5C	[K]	Transcription	Putative uncharacterized protein {ECO:0000313|EMBL:CCB58674.1} OS=Vitis vinifera (Grape) PE=4 SV=1	PREDICTED: DNA-directed RNA polymerase V subunit 5C isoform X1 [Vitis vinifera]
Vad14G001180.1	Molecular Function: inorganic diphosphatase activity (GO:0004427);; Molecular Function: hydrogen-translocating pyrophosphatase activity (GO:0009678);; Biological Process: proton transmembrane transport (GO:0015992);; Cellular Component: membrane (GO:0016020);;	K01507|0|vvi:100233104|K01507 inorganic pyrophosphatase [EC:3.6.1.1] | (RefSeq) H+-pyrophosphatase	--	--	H+-pyrophosphatase {ECO:0000313|EMBL:AAF69010.1} OS=Vitis vinifera (Grape) PE=2 SV=1	unnamed protein product [Vitis vinifera]
Vad17G006400.1	Molecular Function: transmembrane transporter activity (GO:0022857);; Biological Process: transmembrane transport (GO:0055085);;	K03327|6.03657e-17|vvi:100243357|K03327 multidrug resistance protein, MATE family | (RefSeq) protein DETOXIFICATION 16	--	--	Putative uncharacterized protein {ECO:0000313|EMBL:CCB42936.1} OS=Vitis vinifera (Grape) PE=4 SV=1	unnamed protein product [Vitis vinifera]
Vad07G001580.1	--	--	--	--	Putative uncharacterized protein {ECO:0000313|EMBL:CCB56834.1} OS=Vitis vinifera (Grape) PE=4 SV=1	PREDICTED: probable F-box protein At1g60180 [Vitis vinifera]
Vad02G002740.1	Molecular Function: structural constituent of ribosome (GO:0003735);; Biological Process: rRNA processing (GO:0006364);; Biological Process: translation (GO:0006412);; Cellular Component: chloroplast stroma (GO:0009570);; Cellular Component: chloroplast envelope (GO:0009941);; Biological Process: thylakoid membrane organization (GO:0010027);; Biological Process: chlorophyll biosynthetic process (…	K02867|2.79274e-152|vvi:100263279|K02867 large subunit ribosomal protein L11 | (RefSeq) 50S ribosomal protein L11, chloroplastic	[J]	Translation, ribosomal structure and biogenesis	Putative uncharacterized protein {ECO:0000313|EMBL:CCB58316.1} OS=Vitis vinifera (Grape) PE=3 SV=1	PREDICTED: 50S ribosomal protein L11, chloroplastic [Vitis vinifera]
Vad09G006250.1	--	--	--	--	Putative uncharacterized protein {ECO:0000313|EMBL:CCB59634.1} OS=Vitis vinifera (Grape) PE=4 SV=1	PREDICTED: uncharacterized protein LOC100263001 [Vitis vinifera]
Vad03G005170.1	Molecular Function: monooxygenase activity (GO:0004497);; Molecular Function: iron ion binding (GO:0005506);; Molecular Function: electron transfer activity (GO:0009055);; Molecular Function: oxidoreductase activity, acting on paired donors, with incorporation or reduction of molecular oxygen (GO:0016705);; Molecular Function: heme binding (GO:0020037);; Biological Process: oxidation-reduction pr…	K00512|0|vvi:100260701|K00512 steroid 17alpha-monooxygenase / 17alpha-hydroxyprogesterone deacetylase [EC:1.14.14.19 1.14.14.32] | (RefSeq) cytochrome P450 82C4	[Q]	Secondary metabolites biosynthesis, transport and catabolism	Putative uncharacterized protein {ECO:0000313|EMBL:CCB56917.1} OS=Vitis vinifera (Grape) PE=3 SV=1	PREDICTED: cytochrome P450 82C4 [Vitis vinifera]
Vad09G011400.1	Molecular Function: DNA binding (GO:0003677);;	--	--	--	Putative uncharacterized protein {ECO:0000313|EMBL:CCB49903.1} OS=Vitis vinifera (Grape) PE=4 SV=1	PREDICTED: putative DNA-binding protein ESCAROLA [Vitis vinifera]
Vad06G009340.1	Molecular Function: monooxygenase activity (GO:0004497);; Molecular Function: iron ion binding (GO:0005506);; Molecular Function: electron transfer activity (GO:0009055);; Molecular Function: oxidoreductase activity, acting on paired donors, with incorporation or reduction of molecular oxygen (GO:0016705);; Molecular Function: heme binding (GO:0020037);; Biological Process: oxidation-reduction pr…	--	[Q]	Secondary metabolites biosynthesis, transport and catabolism	Putative uncharacterized protein {ECO:0000313|EMBL:CAN82591.1} OS=Vitis vinifera (Grape) PE=3 SV=1	PREDICTED: phenylalanine N-monooxygenase-like [Vitis vinifera]
Vad15G002660.1	Cellular Component: nucleus (GO:0005634);; Biological Process: regulation of transcription, DNA-templated (GO:0006355);; Molecular Function: NAD-dependent histone deacetylase activity (H3-K14 specific) (GO:0032041);; Molecular Function: NAD-dependent histone deacetylase activity (H3-K9 specific) (GO:0046969);; Molecular Function: NAD-dependent histone deacetylase activity (H4-K16 specific) (GO:00…	K06067|0|vvi:100240976|K06067 histone deacetylase 1/2 [EC:3.5.1.98] | (RefSeq) histone deacetylase 9	[B]	Chromatin structure and dynamics	Histone deacetylase {ECO:0000256|PIRNR:PIRNR037913} OS=Vitis vinifera (Grape) PE=3 SV=1	PREDICTED: histone deacetylase 9 isoform X1 [Vitis vinifera]
Vad14G012110.1	--	--	--	--	Putative uncharacterized protein {ECO:0000313|EMBL:CCB58507.1} OS=Vitis vinifera (Grape) PE=4 SV=1	PREDICTED: uncharacterized protein LOC100247380 [Vitis vinifera]
Vad16G002230.1	--	--	[R]	General function prediction only	Putative uncharacterized protein {ECO:0000313|EMBL:CBI38550.3} OS=Vitis vinifera (Grape) PE=4 SV=1	PREDICTED: pentatricopeptide repeat-containing protein At5g14770, mitochondrial [Vitis vinifera]
Vad08G004200.1	--	--	--	--	Putative uncharacterized protein {ECO:0000313|EMBL:CBI18052.3} OS=Vitis vinifera (Grape) PE=4 SV=1	PREDICTED: uncharacterized protein LOC100241389 [Vitis vinifera]
Vad09G008000.1	Molecular Function: ATP binding (GO:0005524);; Biological Process: defense response (GO:0006952);; Molecular Function: nucleoside-triphosphatase activity (GO:0017111);; Molecular Function: ADP binding (GO:0043531);;	K13459|1.26197e-43|vvi:100259933|K13459 disease resistance protein RPS2 | (RefSeq) probable disease resistance protein At5g63020	[T]	Signal transduction mechanisms	Putative uncharacterized protein {ECO:0000313|EMBL:CCB59733.1} OS=Vitis vinifera (Grape) PE=4 SV=1	hypothetical protein VITISV_004032 [Vitis vinifera]
Vad07G001760.1	--	--	[R]	General function prediction only	Putative uncharacterized protein {ECO:0000313|EMBL:CCB56822.1} OS=Vitis vinifera (Grape) PE=4 SV=1	PREDICTED: CSC1-like protein At4g02900 [Vitis vinifera]
Vad15G008810.1	Molecular Function: 3-methyl-2-oxobutanoate hydroxymethyltransferase activity (GO:0003864);; Cellular Component: mitochondrion (GO:0005739);; Molecular Function: methyltransferase activity (GO:0008168);; Molecular Function: zinc ion binding (GO:0008270);; Cellular Component: chloroplast (GO:0009507);; Biological Process: pantothenate biosynthetic process (GO:0015940);; Biological Process: methyla…	K00606|0|vvi:100251716|K00606 3-methyl-2-oxobutanoate hydroxymethyltransferase [EC:2.1.2.11] | (RefSeq) 3-methyl-2-oxobutanoate hydroxymethyltransferase 1, mitochondrial	[H]	Coenzyme transport and metabolism	Putative uncharacterized protein {ECO:0000313|EMBL:CCB62446.1} OS=Vitis vinifera (Grape) PE=3 SV=1	PREDICTED: 3-methyl-2-oxobutanoate hydroxymethyltransferase 1, mitochondrial [Vitis vinifera]
Vad15G001270.1	Molecular Function: hydrolase activity, hydrolyzing O-glycosyl compounds (GO:0004553);; Biological Process: carbohydrate metabolic process (GO:0005975);;	--	--	--	Putative uncharacterized protein {ECO:0000313|EMBL:CCB62753.1} OS=Vitis vinifera (Grape) PE=4 SV=1	hypothetical protein VITISV_012646 [Vitis vinifera]
Vad08G000040.1	Biological Process: sulfur amino acid metabolic process (GO:0000096);; Molecular Function: serine-tRNA ligase activity (GO:0004828);; Molecular Function: ATP binding (GO:0005524);; Cellular Component: mitochondrion (GO:0005739);; Biological Process: rRNA processing (GO:0006364);; Biological Process: seryl-tRNA aminoacylation (GO:0006434);; Biological Process: mitochondrion organization (GO:000700…	K01875|0|vvi:100261676|K01875 seryl-tRNA synthetase [EC:6.1.1.11] | (RefSeq) serine--tRNA ligase, chloroplastic/mitochondrial	[J]	Translation, ribosomal structure and biogenesis	Uncharacterized protein {ECO:0000313|EMBL:KDP41417.1} OS=Jatropha curcas (Barbados nut) PE=3 SV=1	PREDICTED: serine--tRNA ligase, mitochondrial [Vitis vinifera]
Vad0G012990.1	Biological Process: metabolic process (GO:0008152);; Molecular Function: transferase activity, transferring hexosyl groups (GO:0016758);;	--	[GC]	--	Putative uncharacterized protein {ECO:0000313|EMBL:CAN72668.1} OS=Vitis vinifera (Grape) PE=3 SV=1	hypothetical protein VITISV_022183 [Vitis vinifera]
Vad19G001790.1	--	K10581|0|vvi:100262286|K10581 ubiquitin-conjugating enzyme E2 O [EC:2.3.2.24] | (RefSeq) probable ubiquitin-conjugating enzyme E2 26	[O]	Posttranslational modification, protein turnover, chaperones	Putative uncharacterized protein {ECO:0000313|EMBL:CCB46344.1} OS=Vitis vinifera (Grape) PE=4 SV=1	PREDICTED: probable ubiquitin-conjugating enzyme E2 26 [Vitis vinifera]
Vad04G009690.1	--	--	[A]	RNA processing and modification	Putative uncharacterized protein {ECO:0000313|EMBL:CBI17606.3} OS=Vitis vinifera (Grape) PE=4 SV=1	PREDICTED: putative RNA-binding protein Luc7-like 2 [Vitis vinifera]
Vad09G000510.1	--	--	--	--	Putative uncharacterized protein {ECO:0000313|EMBL:CCB59260.1} OS=Vitis vinifera (Grape) PE=4 SV=1	PREDICTED: uncharacterized protein LOC100251482 isoform X1 [Vitis vinifera]
Vad06G009080.1	--	--	--	--	Putative uncharacterized protein {ECO:0000313|EMBL:CBI16867.3} OS=Vitis vinifera (Grape) PE=4 SV=1	unnamed protein product [Vitis vinifera]
Vad10G005680.1	Cellular Component: plasma membrane (GO:0005886);; Cellular Component: integral component of membrane (GO:0016021);;	--	--	--	CASP-like protein {ECO:0000256|RuleBase:RU361233} OS=Theobroma cacao (Cacao) PE=3 SV=1	RecName: Full=CASP-like protein 1C1; Short=VvCASPL1C1 [Vitis vinifera]
Vad04G000320.1	Molecular Function: actin binding (GO:0003779);; Cellular Component: cell wall (GO:0005618);; Cellular Component: nucleolus (GO:0005730);; Cellular Component: spindle (GO:0005819);; Cellular Component: plasma membrane (GO:0005886);; Biological Process: actin polymerization or depolymerization (GO:0008154);; Cellular Component: chloroplast (GO:0009507);; Cellular Component: phragmoplast (GO:000952…	K05759|2.86281e-91|vvi:100261121|K05759 profilin | (RefSeq) profilin-1	[Z]	Cytoskeleton	Profilin {ECO:0000256|RuleBase:RU003909} OS=Vitis vinifera (Grape) PE=3 SV=1	PREDICTED: profilin-1 [Vitis vinifera]
Vad06G004020.1	Molecular Function: iron ion binding (GO:0005506);; Molecular Function: electron transfer activity (GO:0009055);; Biological Process: abscisic acid metabolic process (GO:0009687);; Biological Process: response to red light (GO:0010114);; Molecular Function: (+)-abscisic acid 8'-hydroxylase activity (GO:0010295);; Molecular Function: oxygen binding (GO:0019825);; Molecular Function: heme binding (…	K09843|0|vvi:100260462|K09843 (+)-abscisic acid 8'-hydroxylase [EC:1.14.13.93] | (RefSeq) abscisic acid 8'-hydroxylase 2	[QI]	--	Putative uncharacterized protein {ECO:0000313|EMBL:CBI16102.3} OS=Vitis vinifera (Grape) PE=3 SV=1	PREDICTED: abscisic acid 8&apos;-hydroxylase 2 [Vitis vinifera]
Vad08G007540.1	--	--	[S]	Function unknown	Putative uncharacterized protein {ECO:0000313|EMBL:CAN76819.1} OS=Vitis vinifera (Grape) PE=4 SV=1	PREDICTED: UNC93-like protein 3 [Vitis vinifera]
Vad15G006020.1	Cellular Component: cytosol (GO:0005829);; Molecular Function: O-methyltransferase activity (GO:0008171);; Biological Process: methylation (GO:0032259);;	--	[Q]	Secondary metabolites biosynthesis, transport and catabolism	Putative uncharacterized protein {ECO:0000313|EMBL:CBI38748.3} OS=Vitis vinifera (Grape) PE=4 SV=1	PREDICTED: probable caffeoyl-CoA O-methyltransferase At4g26220 isoform X2 [Vitis vinifera]
Vad19G007980.1	Molecular Function: RNA binding (GO:0003723);; Molecular Function: RNA-directed DNA polymerase activity (GO:0003964);; Biological Process: RNA-dependent DNA biosynthetic process (GO:0006278);;	K15201|0|vvi:100257006|K15201 general transcription factor 3C polypeptide 3 (transcription factor C subunit 4) | (RefSeq) general transcription factor 3C polypeptide 3	[K]	Transcription	Putative uncharacterized protein {ECO:0000313|EMBL:CCB48965.1} OS=Vitis vinifera (Grape) PE=4 SV=1	PREDICTED: general transcription factor 3C polypeptide 3 [Vitis vinifera]
Vad04G008050.1	Molecular Function: transmembrane receptor protein serine/threonine kinase activity (GO:0004675);; Molecular Function: non-membrane spanning protein tyrosine kinase activity (GO:0004715);; Molecular Function: ATP binding (GO:0005524);; Cellular Component: plasma membrane (GO:0005886);; Biological Process: protein phosphorylation (GO:0006468);; Biological Process: transmembrane receptor protein se…	K00924|0|vvi:100265723|K00924 [EC:2.7.1.-] | (RefSeq) receptor protein kinase TMK1	--	--	Putative uncharacterized protein {ECO:0000313|EMBL:CCB51844.1} OS=Vitis vinifera (Grape) PE=3 SV=1	PREDICTED: probable receptor protein kinase TMK1 [Vitis vinifera]
Vad06G012500.1	Molecular Function: 3-oxoacyl-[acyl-carrier-protein] reductase (NADPH) activity (GO:0004316);; Biological Process: oxidation-reduction process (GO:0055114);;	--	[R]	General function prediction only	Putative uncharacterized protein {ECO:0000313|EMBL:CCB51622.1} OS=Vitis vinifera (Grape) PE=3 SV=1	unnamed protein product [Vitis vinifera]
Vad01G008770.1	Molecular Function: protein serine/threonine kinase activity (GO:0004674);; Molecular Function: ATP binding (GO:0005524);; Biological Process: protein phosphorylation (GO:0006468);; Biological Process: transmembrane receptor protein tyrosine kinase signaling pathway (GO:0007169);; Cellular Component: chloroplast (GO:0009507);; Cellular Component: integral component of membrane (GO:0016021);; Biol…	--	--	--	Putative uncharacterized protein {ECO:0000313|EMBL:CCB56615.1} OS=Vitis vinifera (Grape) PE=4 SV=1	PREDICTED: probable inactive receptor kinase At1g27190 [Vitis vinifera]
Vad18G010380.1	--	--	--	--	Putative uncharacterized protein {ECO:0000313|EMBL:CBI19765.3} OS=Vitis vinifera (Grape) PE=4 SV=1	unnamed protein product [Vitis vinifera]
Vad01G011790.1	--	--	--	--	Putative uncharacterized protein {ECO:0000313|EMBL:CCB51199.1} OS=Vitis vinifera (Grape) PE=4 SV=1	--
Vad05G007520.1	--	--	[R]	General function prediction only	Putative uncharacterized protein {ECO:0000313|EMBL:CBI17285.3} OS=Vitis vinifera (Grape) PE=4 SV=1	PREDICTED: putative pentatricopeptide repeat-containing protein At1g03510 [Vitis vinifera]
Vad12G008110.1	--	--	--	--	Putative uncharacterized protein {ECO:0000313|EMBL:CCB57244.1} OS=Vitis vinifera (Grape) PE=4 SV=1	PREDICTED: uncharacterized protein LOC100261012 [Vitis vinifera]
Vad13G013260.1	--	--	--	--	Putative uncharacterized protein {ECO:0000313|EMBL:CBI38002.3} OS=Vitis vinifera (Grape) PE=4 SV=1	unnamed protein product [Vitis vinifera]
Vad14G012340.1	Biological Process: RNA splicing, via endonucleolytic cleavage and ligation (GO:0000394);; Molecular Function: protein serine/threonine kinase activity (GO:0004674);; Molecular Function: protein serine/threonine/tyrosine kinase activity (GO:0004712);; Molecular Function: ATP binding (GO:0005524);; Cellular Component: plasma membrane (GO:0005886);; Biological Process: acetyl-CoA metabolic process …	--	[T]	Signal transduction mechanisms	Putative uncharacterized protein {ECO:0000313|EMBL:CBI34936.3} OS=Vitis vinifera (Grape) PE=4 SV=1	PREDICTED: serine/threonine-protein kinase HT1 [Vitis vinifera]
Vad09G010930.1	Cellular Component: vacuole (GO:0005773);; Biological Process: unsaturated fatty acid biosynthetic process (GO:0006636);; Biological Process: phosphatidylglycerol biosynthetic process (GO:0006655);; Biological Process: pollen development (GO:0009555);; Biological Process: thylakoid membrane organization (GO:0010027);; Biological Process: chlorophyll biosynthetic process (GO:0015995);; Biological …	K01853|0|vvi:100247898|K01853 cycloartenol synthase [EC:5.4.99.8] | (RefSeq) cycloartenol synthase	[I]	Lipid transport and metabolism	Putative uncharacterized protein {ECO:0000313|EMBL:CCB49675.1} OS=Vitis vinifera (Grape) PE=4 SV=1	PREDICTED: cycloartenol synthase-like [Vitis vinifera]
Vad18G016570.1	Molecular Function: catalytic activity (GO:0003824);; Biological Process: biosynthetic process (GO:0009058);; Molecular Function: pyridoxal phosphate binding (GO:0030170);;	K07466|1.15126e-85|vvi:100253881|K07466 replication factor A1 | (RefSeq) uncharacterized protein At4g28440	--	--	Putative uncharacterized protein {ECO:0000313|EMBL:CCB44904.1} OS=Vitis vinifera (Grape) PE=4 SV=1	PREDICTED: uncharacterized protein At4g28440 [Vitis vinifera]
Vad19G000850.1	--	--	--	--	Putative uncharacterized protein {ECO:0000313|EMBL:CCB46278.1} OS=Vitis vinifera (Grape) PE=4 SV=1	PREDICTED: transcription factor TCP4 [Vitis vinifera]
Vad14G013610.1	Molecular Function: DNA binding (GO:0003677);; Molecular Function: DNA-binding transcription factor activity (GO:0003700);; Cellular Component: nucleus (GO:0005634);; Biological Process: regulation of transcription, DNA-templated (GO:0006355);;	--	--	--	Putative uncharacterized protein {ECO:0000313|EMBL:CAN79925.1} OS=Vitis vinifera (Grape) PE=4 SV=1	PREDICTED: AP2-like ethylene-responsive transcription factor At1g16060 [Vitis vinifera]
Vad06G000470.1	--	K15164|0|vvi:100263945|K15164 mediator of RNA polymerase II transcription subunit 13 | (RefSeq) mediator of RNA polymerase II transcription subunit 13	[I]	Lipid transport and metabolism	Putative uncharacterized protein {ECO:0000313|EMBL:CCB43810.1} OS=Vitis vinifera (Grape) PE=4 SV=1	PREDICTED: mediator of RNA polymerase II transcription subunit 13 [Vitis vinifera]
Vad08G009140.1	Molecular Function: calcium ion binding (GO:0005509);; Cellular Component: endoplasmic reticulum (GO:0005783);; Biological Process: pollen wall assembly (GO:0010208);; Cellular Component: membrane (GO:0016020);;	--	--	--	Putative uncharacterized protein {ECO:0000313|EMBL:CBI30432.3} OS=Vitis vinifera (Grape) PE=4 SV=1	PREDICTED: uncharacterized protein LOC100251006 [Vitis vinifera]
Vad19G011240.1	Molecular Function: RNA binding (GO:0003723);; Molecular Function: RNA-directed DNA polymerase activity (GO:0003964);; Cellular Component: nucleus (GO:0005634);; Biological Process: RNA-dependent DNA biosynthetic process (GO:0006278);; Molecular Function: methyltransferase activity (GO:0008168);; Molecular Function: zinc ion binding (GO:0008270);; Biological Process: DNA integration (GO:0015074);…	--	[R]	General function prediction only	Putative uncharacterized protein {ECO:0000313|EMBL:CAN64427.1} OS=Vitis vinifera (Grape) PE=4 SV=1	hypothetical protein VITISV_029384 [Vitis vinifera]
Vad0G023550.1	Cellular Component: mitochondrial respiratory chain complex I (GO:0005747);; Molecular Function: NADH dehydrogenase (ubiquinone) activity (GO:0008137);; Cellular Component: integral component of membrane (GO:0016021);; Biological Process: electron transport chain (GO:0022900);; Biological Process: cellular respiration (GO:0045333);;	K03884|3.64762e-145|vvi:7498585|K03884 NADH-ubiquinone oxidoreductase chain 6 [EC:1.6.5.3] | (RefSeq) nad6, ViviM_p107; NADH dehydrogenase subunit 6	--	--	NADH-ubiquinone oxidoreductase chain 6 {ECO:0000256|RuleBase:RU004430} OS=Vitis vinifera (Grape) PE=3 SV=1	NADH dehydrogenase subunit 6 [Vitis vinifera]
Vad0G017270.1	--	--	--	--	--	hypothetical protein SMAC_10364 [Sordaria macrospora k-hell]
Vad14G004300.1	Molecular Function: DNA-binding transcription factor activity (GO:0003700);; Cellular Component: nucleus (GO:0005634);; Biological Process: regulation of transcription, DNA-templated (GO:0006355);; Biological Process: regulation of translation (GO:0006417);; Biological Process: response to osmotic stress (GO:0006970);; Biological Process: response to light stimulus (GO:0009416);; Cellular Compone…	K14484|5.00066e-173|vvi:100250231|K14484 auxin-responsive protein IAA | (RefSeq) indole-3-acetic acid-induced protein 16	--	--	Auxin-responsive protein {ECO:0000256|RuleBase:RU004549} OS=Vitis vinifera (Grape) PE=2 SV=1	uncharacterized protein LOC100250231 [Vitis vinifera]
Vad08G010670.1	Molecular Function: glucosamine 6-phosphate N-acetyltransferase activity (GO:0004343);; Cellular Component: endoplasmic reticulum (GO:0005783);; Biological Process: N-acetylglucosamine metabolic process (GO:0006044);;	K00621|3.03428e-106|vvi:100249529|K00621 glucosamine-phosphate N-acetyltransferase [EC:2.3.1.4] | (RefSeq) glucosamine 6-phosphate N-acetyltransferase	[M]	Cell wall/membrane/envelope biogenesis	Putative uncharacterized protein {ECO:0000313|EMBL:CAN62760.1} OS=Vitis vinifera (Grape) PE=4 SV=1	hypothetical protein VITISV_021810 [Vitis vinifera]
Vad01G000480.1	Cellular Component: chloroplast thylakoid (GO:0009534);; Biological Process: photosynthetic acclimation (GO:0009643);; Cellular Component: chloroplast envelope (GO:0009941);; Molecular Function: phosphoglycerate transmembrane transporter activity (GO:0015120);; Molecular Function: antiporter activity (GO:0015297);; Biological Process: phosphoglycerate transmembrane transport (GO:0015713);; Cellul…	K15283|0|vvi:100259322|K15283 solute carrier family 35, member E1 | (RefSeq) triose phosphate/phosphate translocator, chloroplastic	[GE]	--	Putative uncharacterized protein {ECO:0000313|EMBL:CBI27279.3} OS=Vitis vinifera (Grape) PE=4 SV=1	PREDICTED: triose phosphate/phosphate translocator, chloroplastic [Vitis vinifera]
Vad13G003550.1	Molecular Function: protein binding (GO:0005515);;	--	--	--	Putative uncharacterized protein {ECO:0000313|EMBL:CCB56332.1} OS=Vitis vinifera (Grape) PE=4 SV=1	PREDICTED: cyclin-dependent protein kinase inhibitor SMR2 [Nelumbo nucifera]
Vad09G005840.1	--	K15014|0|vvi:100254327|K15014 solute carrier family 29 (equilibrative nucleoside transporter), member 1/2/3 | (RefSeq) equilibrative nucleotide transporter 8-like	[F]	Nucleotide transport and metabolism	Putative uncharacterized protein {ECO:0000313|EMBL:CCB59600.1} OS=Vitis vinifera (Grape) PE=4 SV=1	PREDICTED: equilibrative nucleotide transporter 8-like [Vitis vinifera]
Vad0G005030.1	Molecular Function: ligase activity (GO:0016874);; Molecular Function: ion binding (GO:0043167);;	K01961|1.19868e-156|csl:COCSUDRAFT_64553|K01961 acetyl-CoA carboxylase, biotin carboxylase subunit [EC:6.4.1.2 6.3.4.14] | (RefSeq) hypothetical protein	[IE]	--	Acetyl-CoA carboxylase, biotin carboxylase subunit {ECO:0000313|EMBL:EKU20196.1} OS=Nannochloropsis gaditana CCMP526 PE=4 SV=1	acetyl-CoA carboxylase, biotin carboxylase subunit [Nannochloropsis gaditana CCMP526]
Vad04G003140.1	Molecular Function: nucleic acid binding (GO:0003676);; Molecular Function: zinc ion binding (GO:0008270);;	--	[Q]	Secondary metabolites biosynthesis, transport and catabolism	Putative uncharacterized protein {ECO:0000313|EMBL:CBI20860.3} OS=Vitis vinifera (Grape) PE=4 SV=1	PREDICTED: carotenoid 9,10(9&apos;,10&apos;)-cleavage dioxygenase 1-like isoform X1 [Vitis vinifera]
Vad07G007430.1	--	--	--	--	Putative uncharacterized protein {ECO:0000313|EMBL:CBI37213.3} OS=Vitis vinifera (Grape) PE=4 SV=1	PREDICTED: uncharacterized protein LOC100241271 [Vitis vinifera]
Vad13G000120.1	--	--	--	--	Putative uncharacterized protein {ECO:0000313|EMBL:CCB49888.1} OS=Vitis vinifera (Grape) PE=4 SV=1	PREDICTED: uncharacterized protein LOC100265611 [Vitis vinifera]
Vad02G009540.1	--	--	--	--	Putative uncharacterized protein {ECO:0000313|EMBL:CBI37460.3} OS=Vitis vinifera (Grape) PE=4 SV=1	unnamed protein product [Vitis vinifera]
Vad18G007540.1	--	--	--	--	Putative uncharacterized protein {ECO:0000313|EMBL:CBI19475.3} OS=Vitis vinifera (Grape) PE=4 SV=1	unnamed protein product [Vitis vinifera]
Vad04G011360.1	Biological Process: phosphatidylinositol biosynthetic process (GO:0006661);;	K20726|1.95154e-166|vvi:100259075|K20726 transmembrane protein 222 | (RefSeq) CBF2; protein RTE1-HOMOLOG	[S]	Function unknown	Putative uncharacterized protein {ECO:0000313|EMBL:CCB44401.1} OS=Vitis vinifera (Grape) PE=4 SV=1	PREDICTED: protein RTE1-HOMOLOG isoform X1 [Vitis vinifera]
Vad10G013890.1	Molecular Function: nucleic acid binding (GO:0003676);; Molecular Function: protein serine/threonine kinase activity (GO:0004674);; Molecular Function: ATP binding (GO:0005524);; Biological Process: obsolete ATP catabolic process (GO:0006200);; Biological Process: protein phosphorylation (GO:0006468);; Biological Process: defense response (GO:0006952);; Biological Process: signal transduction (GO…	--	[R]	General function prediction only	Putative uncharacterized protein {ECO:0000313|EMBL:CAN68235.1} OS=Vitis vinifera (Grape) PE=4 SV=1	hypothetical protein VITISV_037104 [Vitis vinifera]
Vad18G000340.1	Molecular Function: 6-phosphofructokinase activity (GO:0003872);; Molecular Function: ATP binding (GO:0005524);; Cellular Component: 6-phosphofructokinase complex (GO:0005945);; Biological Process: glycolytic process (GO:0006096);; Biological Process: response to sucrose (GO:0009744);; Biological Process: response to glucose (GO:0009749);; Biological Process: response to fructose (GO:0009750);; B…	K00895|0|vvi:100249662|K00895 diphosphate-dependent phosphofructokinase [EC:2.7.1.90] | (RefSeq) pyrophosphate--fructose 6-phosphate 1-phosphotransferase subunit alpha	[G]	Carbohydrate transport and metabolism	Putative uncharacterized protein {ECO:0000313|EMBL:CCB62683.1} OS=Vitis vinifera (Grape) PE=4 SV=1	PREDICTED: pyrophosphate--fructose 6-phosphate 1-phosphotransferase subunit alpha [Vitis vinifera]
Vad18G018900.1	Molecular Function: ATP binding (GO:0005524);; Biological Process: defense response (GO:0006952);; Biological Process: signal transduction (GO:0007165);; Molecular Function: nucleoside-triphosphatase activity (GO:0017111);; Molecular Function: ADP binding (GO:0043531);;	--	--	--	Putative uncharacterized protein {ECO:0000313|EMBL:CCB61649.1} OS=Vitis vinifera (Grape) PE=4 SV=1	PREDICTED: TMV resistance protein N-like [Vitis vinifera]
Vad07G000450.1	Molecular Function: N-acetyltransferase activity (GO:0008080);;	K06062|0|vvi:100252806|K06062 histone acetyltransferase [EC:2.3.1.48] | (RefSeq) histone acetyltransferase GCN5	[BK]	--	Putative uncharacterized protein {ECO:0000313|EMBL:CCB44696.1} OS=Vitis vinifera (Grape) PE=4 SV=1	PREDICTED: histone acetyltransferase GCN5-like [Vitis vinifera]
Vad07G006300.1	Molecular Function: DNA binding (GO:0003677);; Molecular Function: DNA-binding transcription factor activity (GO:0003700);; Cellular Component: nucleus (GO:0005634);; Biological Process: regulation of transcription, DNA-templated (GO:0006355);;	K14516|2.14768e-156|vvi:100260028|K14516 ethylene-responsive transcription factor 1 | (RefSeq) ethylene-responsive transcription factor 1B	--	--	Putative uncharacterized protein {ECO:0000313|EMBL:CAN73126.1} OS=Vitis vinifera (Grape) PE=4 SV=1	hypothetical protein VITISV_004212 [Vitis vinifera]
Vad07G016090.1	Molecular Function: transferase activity, transferring acyl groups (GO:0016746);;	--	--	--	Putative uncharacterized protein {ECO:0000313|EMBL:CCB47052.1} OS=Vitis vinifera (Grape) PE=4 SV=1	PREDICTED: uncharacterized protein LOC100245729 [Vitis vinifera]
Vad10G008520.1	Cellular Component: integral component of membrane (GO:0016021);;	--	--	--	Putative uncharacterized protein {ECO:0000313|EMBL:CCB55762.1} OS=Vitis vinifera (Grape) PE=4 SV=1	PREDICTED: probable purine permease 10 [Vitis vinifera]
Vad04G005430.1	Cellular Component: plasma membrane (GO:0005886);;	--	[S]	Function unknown	Putative uncharacterized protein {ECO:0000313|EMBL:CCB46831.1} OS=Vitis vinifera (Grape) PE=4 SV=1	PREDICTED: deSI-like protein At4g17486 [Vitis vinifera]
Vad0G024430.1	Biological Process: carbohydrate metabolic process (GO:0005975);; Molecular Function: beta-glucosidase activity (GO:0008422);;	K05349|0|vvi:100267983|K05349 beta-glucosidase [EC:3.2.1.21] | (RefSeq) beta-glucosidase BoGH3B	--	--	Putative uncharacterized protein {ECO:0000313|EMBL:CCB49560.1} OS=Vitis vinifera (Grape) PE=4 SV=1	PREDICTED: lysosomal beta glucosidase [Vitis vinifera]
Vad08G013380.1	Molecular Function: DNA binding (GO:0003677);; Molecular Function: chromatin binding (GO:0003682);;	--	--	--	Putative uncharacterized protein {ECO:0000313|EMBL:CCB55258.1} OS=Vitis vinifera (Grape) PE=4 SV=1	PREDICTED: protein PHR1-LIKE 1 isoform X2 [Vitis vinifera]
Vad15G003360.1	--	--	[R]	General function prediction only	Putative uncharacterized protein {ECO:0000313|EMBL:CAN70994.1} OS=Vitis vinifera (Grape) PE=4 SV=1	hypothetical protein VITISV_038698 [Vitis vinifera]
Vad07G010720.1	--	--	[R]	General function prediction only	Putative uncharacterized protein {ECO:0000313|EMBL:CCB48293.1} OS=Vitis vinifera (Grape) PE=4 SV=1	hypothetical protein VITISV_039036 [Vitis vinifera]
Vad07G018610.1	--	--	--	--	Putative uncharacterized protein {ECO:0000313|EMBL:CCB47180.1} OS=Vitis vinifera (Grape) PE=4 SV=1	PREDICTED: MACPF domain-containing protein At4g24290-like [Vitis vinifera]
Vad11G010850.1	Cellular Component: vacuole (GO:0005773);; Biological Process: unsaturated fatty acid biosynthetic process (GO:0006636);; Biological Process: phosphatidylglycerol biosynthetic process (GO:0006655);; Biological Process: pollen development (GO:0009555);; Biological Process: thylakoid membrane organization (GO:0010027);; Biological Process: tetracyclic triterpenoid biosynthetic process (GO:0010686);…	K01853|0|vvi:100243389|K01853 cycloartenol synthase [EC:5.4.99.8] | (RefSeq) cycloartenol Synthase	[I]	Lipid transport and metabolism	Putative uncharacterized protein {ECO:0000313|EMBL:CBI24077.3} OS=Vitis vinifera (Grape) PE=4 SV=1	PREDICTED: cycloartenol Synthase [Vitis vinifera]
Vad10G000940.1	Biological Process: chlorophyll catabolic process (GO:0015996);;	--	--	--	Putative uncharacterized protein {ECO:0000313|EMBL:CBI23226.3} OS=Vitis vinifera (Grape) PE=4 SV=1	PREDICTED: uncharacterized protein LOC100245276 isoform X1 [Vitis vinifera]
Vad05G010410.1	Cellular Component: mitochondrion (GO:0005739);;	--	--	--	Putative uncharacterized protein {ECO:0000313|EMBL:CCB59830.1} OS=Vitis vinifera (Grape) PE=4 SV=1	PREDICTED: uncharacterized protein LOC100264652 [Vitis vinifera]
Vad03G005970.1	Biological Process: autophagy (GO:0006914);; Biological Process: leaf senescence (GO:0010150);;	K17906|0|vvi:100257340|K17906 autophagy-related protein 2 | (RefSeq) autophagy-related protein 2	[U]	Intracellular trafficking, secretion, and vesicular transport	Putative uncharacterized protein {ECO:0000313|EMBL:CBI32426.3} OS=Vitis vinifera (Grape) PE=4 SV=1	PREDICTED: uncharacterized protein LOC100257340 isoform X5 [Vitis vinifera]
Vad17G004010.1	Molecular Function: acetate-CoA ligase activity (GO:0003987);; Biological Process: metabolic process (GO:0008152);;	--	[I]	Lipid transport and metabolism	Putative uncharacterized protein {ECO:0000313|EMBL:CBI15386.3} OS=Vitis vinifera (Grape) PE=4 SV=1	PREDICTED: probable acyl-activating enzyme 17, peroxisomal [Vitis vinifera]
Vad14G005240.1	Cellular Component: cell wall (GO:0005618);; Cellular Component: peroxisome (GO:0005777);; Biological Process: response to stress (GO:0006950);; Molecular Function: betaine-aldehyde dehydrogenase activity (GO:0008802);; Cellular Component: chloroplast (GO:0009507);; Biological Process: phenylpropanoid metabolic process (GO:0009698);; Biological Process: glycine betaine biosynthetic process from c…	K00130|2.21593e-55|vvi:100246770|K00130 betaine-aldehyde dehydrogenase [EC:1.2.1.8] | (RefSeq) betaine aldehyde dehydrogenase 2, mitochondrial	[C]	Energy production and conversion	Putative uncharacterized protein {ECO:0000313|EMBL:CBI22381.3} OS=Vitis vinifera (Grape) PE=4 SV=1	unnamed protein product [Vitis vinifera]
Vad07G005910.1	Biological Process: glycogen biosynthetic process (GO:0005978);; Molecular Function: glucose-1-phosphate adenylyltransferase activity (GO:0008878);; Cellular Component: chloroplast (GO:0009507);; Biological Process: starch biosynthetic process (GO:0019252);;	K00975|0|vvi:100248665|K00975 glucose-1-phosphate adenylyltransferase [EC:2.7.7.27] | (RefSeq) glucose-1-phosphate adenylyltransferase large subunit 1	[M]	Cell wall/membrane/envelope biogenesis	Glucose-1-phosphate adenylyltransferase {ECO:0000256|RuleBase:RU003565} OS=Vitis vinifera (Grape) PE=3 SV=1	PREDICTED: glucose-1-phosphate adenylyltransferase large subunit 1-like isoform X1 [Vitis vinifera]
Vad14G002860.1	Cellular Component: extracellular region (GO:0005576);; Molecular Function: manganese ion binding (GO:0030145);; Molecular Function: nutrient reservoir activity (GO:0045735);;	--	--	--	Putative uncharacterized protein {ECO:0000313|EMBL:CBI36779.3} OS=Vitis vinifera (Grape) PE=4 SV=1	unnamed protein product [Vitis vinifera]
Vad11G003740.1	--	--	--	--	Putative uncharacterized protein {ECO:0000313|EMBL:CBI28085.3} OS=Vitis vinifera (Grape) PE=4 SV=1	unnamed protein product [Vitis vinifera]
Vad14G005320.1	--	--	[R]	General function prediction only	Putative uncharacterized protein {ECO:0000313|EMBL:CCB47650.1} OS=Vitis vinifera (Grape) PE=4 SV=1	PREDICTED: pentatricopeptide repeat-containing protein At1g08610 [Vitis vinifera]
Vad0G025240.1	Molecular Function: catalytic activity (GO:0003824);; Biological Process: branched-chain amino acid biosynthetic process (GO:0009082);; Molecular Function: cation binding (GO:0043169);;	K01652|1.03042e-123|smo:SELMODRAFT_269200|K01652 acetolactate synthase I/II/III large subunit [EC:2.2.1.6] | (RefSeq) hypothetical protein	[EH]	--	Acetolactate synthase {ECO:0000256|RuleBase:RU003591} OS=Selaginella moellendorffii (Spikemoss) PE=3 SV=1	hypothetical protein SELMODRAFT_269200 [Selaginella moellendorffii]
Vad11G008390.1	--	--	[R]	General function prediction only	Putative uncharacterized protein {ECO:0000313|EMBL:CAN76466.1} OS=Vitis vinifera (Grape) PE=4 SV=1	PREDICTED: uncharacterized protein LOC100854873 [Vitis vinifera]
Vad18G016830.1	Molecular Function: magnesium ion binding (GO:0000287);; Biological Process: metabolic process (GO:0008152);; Molecular Function: terpene synthase activity (GO:0010333);;	--	--	--	Putative uncharacterized protein {ECO:0000313|EMBL:CCB56049.1} OS=Vitis vinifera (Grape) PE=4 SV=1	unnamed protein product [Vitis vinifera]
Vad06G002250.1	--	--	--	--	Serine/threonine-protein kinase {ECO:0000256|PIRNR:PIRNR000641} OS=Theobroma cacao (Cacao) PE=3 SV=1	PREDICTED: putative receptor protein kinase ZmPK1 [Vitis vinifera]
Vad03G003010.1	Biological Process: polysaccharide biosynthetic process (GO:0000271);; Molecular Function: Rho guanyl-nucleotide exchange factor activity (GO:0005089);; Biological Process: pattern specification process (GO:0007389);; Biological Process: asymmetric cell division (GO:0008356);; Biological Process: regulation of cell size (GO:0008361);; Biological Process: multidimensional cell growth (GO:0009825);…	--	--	--	Putative uncharacterized protein {ECO:0000313|EMBL:CBI37759.3} OS=Vitis vinifera (Grape) PE=4 SV=1	PREDICTED: rop guanine nucleotide exchange factor 1 [Vitis vinifera]
Vad0G019650.1	--	--	--	--	--	hypothetical protein PFICI_03459 [Pestalotiopsis fici W106-1]
Vad12G012870.1	Molecular Function: DNA binding (GO:0003677);; Biological Process: regulation of transcription, DNA-templated (GO:0006355);;	--	--	--	Putative uncharacterized protein {ECO:0000313|EMBL:CAN66223.1} OS=Vitis vinifera (Grape) PE=4 SV=1	PREDICTED: NAC domain-containing protein 18 [Vitis vinifera]
Vad10G007110.1	--	--	[K]	Transcription	Putative uncharacterized protein {ECO:0000313|EMBL:CCB55686.1} OS=Vitis vinifera (Grape) PE=4 SV=1	PREDICTED: trihelix transcription factor ASIL1-like isoform X1 [Vitis vinifera]
Vad0G008570.1	Molecular Function: catalytic activity (GO:0003824);; Biological Process: nucleobase-containing compound metabolic process (GO:0006139);; Biological Process: signal transduction (GO:0007165);;	--	--	--	Uncharacterized protein {ECO:0000313|EnsemblProtists:HpaP814178} OS=Hyaloperonospora arabidopsidis (strain Emoy2) PE=4 SV=1	putative signaling protein [Beauveria bassiana D1-5]
Vad07G014900.1	Molecular Function: structural constituent of ribosome (GO:0003735);; Biological Process: DNA-templated transcription, elongation (GO:0006354);; Biological Process: translation (GO:0006412);; Biological Process: chloroplast organization (GO:0009658);; Biological Process: embryo development ending in seed dormancy (GO:0009793);; Cellular Component: large ribosomal subunit (GO:0015934);; Biological…	K02935|5.48815e-113|vvi:100260435|K02935 large subunit ribosomal protein L7/L12 | (RefSeq) 50S ribosomal protein L7/L12	[J]	Translation, ribosomal structure and biogenesis	Putative uncharacterized protein {ECO:0000313|EMBL:CCB59181.1} OS=Vitis vinifera (Grape) PE=3 SV=1	PREDICTED: 50S ribosomal protein L12, chloroplastic-like [Vitis vinifera]
Vad09G009070.1	--	--	[R]	General function prediction only	Putative uncharacterized protein {ECO:0000313|EMBL:CCB45088.1} OS=Vitis vinifera (Grape) PE=4 SV=1	PREDICTED: LRR receptor-like serine/threonine-protein kinase FLS2 [Vitis vinifera]
Vad19G000900.1	Molecular Function: ionotropic glutamate receptor activity (GO:0004970);; Molecular Function: extracellularly glutamate-gated ion channel activity (GO:0005234);; Biological Process: ion transport (GO:0006811);; Cellular Component: integral component of membrane (GO:0016021);; Biological Process: ionotropic glutamate receptor signaling pathway (GO:0035235);;	K05387|0|vvi:100257269|K05387 glutamate receptor, ionotropic, plant | (RefSeq) glutamate receptor 2.8-like	[PET]	--	Putative uncharacterized protein {ECO:0000313|EMBL:CAN66791.1} OS=Vitis vinifera (Grape) PE=4 SV=1	PREDICTED: glutamate receptor 2.8-like [Vitis vinifera]
Vad03G002310.1	Biological Process: cytidine to uridine editing (GO:0016554);;	--	[R]	General function prediction only	Putative uncharacterized protein {ECO:0000313|EMBL:CCB60590.1} OS=Vitis vinifera (Grape) PE=4 SV=1	PREDICTED: pentatricopeptide repeat-containing protein At1g62260, mitochondrial [Vitis vinifera]
Vad05G002120.1	--	--	[T]	Signal transduction mechanisms	Putative uncharacterized protein {ECO:0000313|EMBL:CAN76672.1} OS=Vitis vinifera (Grape) PE=4 SV=1	hypothetical protein VITISV_011789 [Vitis vinifera]
Vad09G003330.1	Cellular Component: nucleus (GO:0005634);;	K18183|2.58548e-66|vvi:100251595|K18183 cytochrome c oxidase assembly protein subunit 19 | (RefSeq) cytochrome c oxidase assembly protein COX19	[C]	Energy production and conversion	Putative uncharacterized protein {ECO:0000313|EMBL:CBI36097.3} OS=Vitis vinifera (Grape) PE=4 SV=1	PREDICTED: cytochrome c oxidase assembly protein COX19 [Vitis vinifera]
Vad03G007610.1	Cellular Component: nucleus (GO:0005634);;	K18810|0|vvi:100251483|K18810 cyclin D1/2/4, plant | (RefSeq) cyclin-D2-1	[D]	Cell cycle control, cell division, chromosome partitioning	Putative uncharacterized protein {ECO:0000313|EMBL:CBI22435.3} OS=Vitis vinifera (Grape) PE=3 SV=1	PREDICTED: cyclin-D2-1 [Vitis vinifera]
Vad18G006760.1	Molecular Function: calmodulin binding (GO:0005516);; Cellular Component: plasma membrane (GO:0005886);;	--	[T]	Signal transduction mechanisms	Putative uncharacterized protein {ECO:0000313|EMBL:CCB45752.1} OS=Vitis vinifera (Grape) PE=4 SV=1	PREDICTED: tetratricopeptide repeat protein 7B [Vitis vinifera]
Vad12G002640.1	Molecular Function: DNA-binding transcription factor activity (GO:0003700);; Cellular Component: nucleus (GO:0005634);; Cellular Component: endoplasmic reticulum (GO:0005783);; Biological Process: regulation of transcription, DNA-templated (GO:0006355);; Molecular Function: sequence-specific DNA binding (GO:0043565);;	--	--	--	Putative uncharacterized protein {ECO:0000313|EMBL:CBI21903.3} OS=Vitis vinifera (Grape) PE=4 SV=1	PREDICTED: uncharacterized protein LOC100245474 [Vitis vinifera]
Vad10G004060.1	Molecular Function: magnesium ion binding (GO:0000287);; Biological Process: metabolic process (GO:0008152);; Molecular Function: terpene synthase activity (GO:0010333);; Molecular Function: S-linalool synthase activity (GO:0034007);;	K15086|0|vvi:100852776|K15086 (3S)-linalool synthase [EC:4.2.3.25] | (RefSeq) (3S,6E)-nerolidol synthase 1	--	--	Putative uncharacterized protein {ECO:0000313|EMBL:CCB48413.1} OS=Vitis vinifera (Grape) PE=4 SV=1	PREDICTED: (3S,6E)-nerolidol synthase 1-like [Vitis vinifera]
Vad19G004370.1	--	K19025|0|vvi:100248758|K19025 AP-5 complex subunit zeta-1 | (RefSeq) AP-5 complex subunit zeta-1	--	--	Putative uncharacterized protein {ECO:0000313|EMBL:CBI23948.3} OS=Vitis vinifera (Grape) PE=4 SV=1	PREDICTED: AP-5 complex subunit zeta-1 [Vitis vinifera]
Vad16G010580.1	Molecular Function: protein serine/threonine kinase activity (GO:0004674);; Molecular Function: ATP binding (GO:0005524);; Biological Process: protein phosphorylation (GO:0006468);; Molecular Function: polysaccharide binding (GO:0030247);;	K04733|0|vvi:100853180|K04733 interleukin-1 receptor-associated kinase 4 [EC:2.7.11.1] | (RefSeq) rust resistance kinase Lr10-like	--	--	Putative uncharacterized protein {ECO:0000313|EMBL:CCB48398.1} OS=Vitis vinifera (Grape) PE=3 SV=1	PREDICTED: glycerophosphodiester phosphodiesterase protein kinase domain-containing GDPDL2-like [Vitis vinifera]
Vad08G000820.1	Molecular Function: DNA binding (GO:0003677);; Molecular Function: DNA-directed 5'-3' RNA polymerase activity (GO:0003899);; Biological Process: transcription, DNA-templated (GO:0006351);;	--	[T]	Signal transduction mechanisms	Putative uncharacterized protein {ECO:0000313|EMBL:CCB55985.1} OS=Vitis vinifera (Grape) PE=4 SV=1	PREDICTED: probable ADP-ribosylation factor GTPase-activating protein AGD14 [Vitis vinifera]
Vad12G000370.1	Molecular Function: DNA binding (GO:0003677);;	--	--	--	Putative uncharacterized protein {ECO:0000313|EMBL:CCB47473.1} OS=Vitis vinifera (Grape) PE=4 SV=1	PREDICTED: putative DNA-binding protein ESCAROLA [Vitis vinifera]
Vad04G003920.1	--	--	--	--	Putative uncharacterized protein {ECO:0000313|EMBL:CCB46750.1} OS=Vitis vinifera (Grape) PE=4 SV=1	unnamed protein product [Vitis vinifera]
Vad01G012960.1	--	K18342|5.44426e-105|vvi:100251219|K18342 OTU domain-containing protein 6 [EC:3.4.19.12] | (RefSeq) OTU domain-containing protein At3g57810	[TO]	--	Putative uncharacterized protein {ECO:0000313|EMBL:CBI27582.3} OS=Vitis vinifera (Grape) PE=4 SV=1	PREDICTED: OTU domain-containing protein At3g57810 isoform X3 [Vitis vinifera]
Vad19G011040.1	Molecular Function: RNA binding (GO:0003723);; Molecular Function: RNA-directed DNA polymerase activity (GO:0003964);; Molecular Function: RNA-DNA hybrid ribonuclease activity (GO:0004523);; Biological Process: RNA-dependent DNA biosynthetic process (GO:0006278);; Biological Process: DNA integration (GO:0015074);;	--	[R]	General function prediction only	Putative uncharacterized protein {ECO:0000313|EMBL:CAN61732.1} OS=Vitis vinifera (Grape) PE=4 SV=1	hypothetical protein VITISV_008285 [Vitis vinifera]
Vad05G006080.1	Molecular Function: ammonium transmembrane transporter activity (GO:0008519);; Cellular Component: integral component of membrane (GO:0016021);; Biological Process: ammonium transmembrane transport (GO:0072488);;	K03320|0|vvi:100258016|K03320 ammonium transporter, Amt family | (RefSeq) ammonium transporter 1 member 1	[P]	Inorganic ion transport and metabolism	Putative uncharacterized protein {ECO:0000313|EMBL:CCB59219.1} OS=Vitis vinifera (Grape) PE=4 SV=1	PREDICTED: ammonium transporter 1 member 1 [Vitis vinifera]
Vad01G001730.1	Molecular Function: catalytic activity (GO:0003824);; Biological Process: metabolic process (GO:0008152);;	--	--	--	Putative uncharacterized protein {ECO:0000313|EMBL:CCB51005.1} OS=Vitis vinifera (Grape) PE=4 SV=1	unnamed protein product [Vitis vinifera]
Vad18G016300.1	Molecular Function: ATP binding (GO:0005524);; Biological Process: defense response (GO:0006952);; Biological Process: signal transduction (GO:0007165);; Cellular Component: membrane (GO:0016020);; Molecular Function: nucleoside-triphosphatase activity (GO:0017111);; Molecular Function: ADP binding (GO:0043531);; Biological Process: transmembrane transport (GO:0055085);;	--	--	--	Putative uncharacterized protein {ECO:0000313|EMBL:CCB44163.1} OS=Vitis vinifera (Grape) PE=4 SV=1	hypothetical protein VITISV_032106 [Vitis vinifera]
Vad09G007870.1	Molecular Function: polygalacturonase activity (GO:0004650);; Cellular Component: extracellular region (GO:0005576);; Biological Process: carbohydrate metabolic process (GO:0005975);;	--	--	--	Putative uncharacterized protein {ECO:0000313|EMBL:CBI33426.3} OS=Vitis vinifera (Grape) PE=3 SV=1	PREDICTED: probable polygalacturonase At3g15720 [Vitis vinifera]
Vad13G006900.1	Cellular Component: cytosol (GO:0005829);;	--	[S]	Function unknown	Putative uncharacterized protein {ECO:0000313|EMBL:CCB49214.1} OS=Vitis vinifera (Grape) PE=4 SV=1	unnamed protein product [Vitis vinifera]
Vad0G026180.1	Molecular Function: transferase activity (GO:0016740);; Biological Process: cellular metabolic process (GO:0044237);; Biological Process: metabolic process (GO:0044710);; Biological Process: organonitrogen compound metabolic process (GO:1901564);;	--	[H]	Coenzyme transport and metabolism	Uroporphyrin-III C-methyltransferase {ECO:0000313|EMBL:EOD12451.1} OS=Emiliania huxleyi CCMP1516 PE=3 SV=1	PREDICTED: siroheme synthase-like [Cucumis sativus]
Vad0G002010.1	--	--	[IE]	--	Urea carboxylase {ECO:0000313|EMBL:EIE19127.1} OS=Coccomyxa subellipsoidea C-169 PE=4 SV=1	Urea amidolyase [Beauveria bassiana D1-5]
Vad0G023660.1	--	--	--	--	Uncharacterized protein {ECO:0000313|EMBL:ERM96855.1} OS=Amborella trichopoda PE=4 SV=1	hypothetical protein AMTR_s00510p00011440 [Amborella trichopoda]
Vad05G005150.1	--	--	[T]	Signal transduction mechanisms	Putative uncharacterized protein {ECO:0000313|EMBL:CCB48592.1} OS=Vitis vinifera (Grape) PE=3 SV=1	unnamed protein product [Vitis vinifera]
Vad01G007530.1	Molecular Function: GTP binding (GO:0005525);; Cellular Component: vacuole (GO:0005773);; Cellular Component: Golgi-associated vesicle (GO:0005798);; Biological Process: N-terminal protein myristoylation (GO:0006499);; Biological Process: small GTPase mediated signal transduction (GO:0007264);; Cellular Component: plastid (GO:0009536);; Molecular Function: phospholipase activator activity (GO:001…	K07937|5.05948e-132|vvi:100243082|K07937 ADP-ribosylation factor 1 | (RefSeq) ADP-ribosylation factor 2	[U]	Intracellular trafficking, secretion, and vesicular transport	Uncharacterized protein {ECO:0000313|EMBL:ESW29437.1} OS=Phaseolus vulgaris (Kidney bean) PE=3 SV=1	PREDICTED: ADP-ribosylation factor 2 isoform X1 [Vitis vinifera]
Vad13G000100.1	Molecular Function: zinc ion binding (GO:0008270);;	--	[S]	Function unknown	Putative uncharacterized protein {ECO:0000313|EMBL:CCB49889.1} OS=Vitis vinifera (Grape) PE=4 SV=1	PREDICTED: autophagy-related protein 18c-like [Vitis vinifera]
Vad16G005990.1	Molecular Function: carbohydrate binding (GO:0030246);;	--	--	--	Putative uncharacterized protein {ECO:0000313|EMBL:CCB56466.1} OS=Vitis vinifera (Grape) PE=4 SV=1	PREDICTED: F-box protein PP2-A13 [Vitis vinifera]
Vad14G010820.1	--	--	--	--	Putative uncharacterized protein {ECO:0000313|EMBL:CCB62241.1} OS=Vitis vinifera (Grape) PE=4 SV=1	PREDICTED: uncharacterized protein LOC100243984 [Vitis vinifera]
Vad03G009530.1	Molecular Function: RNA binding (GO:0003723);; Molecular Function: RNA-directed DNA polymerase activity (GO:0003964);; Biological Process: RNA-dependent DNA biosynthetic process (GO:0006278);; Molecular Function: zinc ion binding (GO:0008270);; Biological Process: DNA integration (GO:0015074);;	--	--	--	Putative uncharacterized protein {ECO:0000313|EMBL:CCB60730.1} OS=Vitis vinifera (Grape) PE=4 SV=1	hypothetical protein VITISV_001649 [Vitis vinifera]
Vad12G001200.1	Molecular Function: DNA-binding transcription factor activity (GO:0003700);; Cellular Component: nucleus (GO:0005634);; Biological Process: regulation of transcription, DNA-templated (GO:0006355);; Biological Process: response to heat (GO:0009408);; Molecular Function: sequence-specific DNA binding (GO:0043565);;	K09419|0|vvi:100250580|K09419 heat shock transcription factor, other eukaryote | (RefSeq) heat stress transcription factor A-4b	[K]	Transcription	Putative uncharacterized protein {ECO:0000313|EMBL:CAN80282.1} OS=Vitis vinifera (Grape) PE=3 SV=1	PREDICTED: heat stress transcription factor A-4b [Vitis vinifera]
Vad18G015270.1	--	K06316|1.26879e-27|vvi:100243141|K06316 oligosaccharide translocation protein RFT1 | (RefSeq) protein RFT1 homolog	[D]	Cell cycle control, cell division, chromosome partitioning	Putative uncharacterized protein {ECO:0000313|EMBL:CBI16973.3} OS=Vitis vinifera (Grape) PE=4 SV=1	unnamed protein product [Vitis vinifera]
Vad08G011470.1	Biological Process: nuclear-transcribed mRNA catabolic process (GO:0000956);; Molecular Function: DNA binding (GO:0003677);; Molecular Function: chromatin binding (GO:0003682);; Cellular Component: cytoplasm (GO:0005737);; Biological Process: pyrimidine nucleotide biosynthetic process (GO:0006221);; Biological Process: cellular amino acid biosynthetic process (GO:0008652);; Molecular Function: UM…	--	--	--	Putative uncharacterized protein {ECO:0000313|EMBL:CCB55379.1} OS=Vitis vinifera (Grape) PE=3 SV=1	PREDICTED: uncharacterized protein LOC100264768 isoform X1 [Vitis vinifera]
Vad15G002760.1	Molecular Function: phosphoprotein phosphatase activity (GO:0004721);; Molecular Function: calcium ion binding (GO:0005509);; Biological Process: metabolic process (GO:0008152);;	--	[T]	Signal transduction mechanisms	Putative uncharacterized protein {ECO:0000313|EMBL:CCB43924.1} OS=Vitis vinifera (Grape) PE=4 SV=1	unnamed protein product [Vitis vinifera]
Vad12G000460.1	--	--	[R]	General function prediction only	Putative uncharacterized protein {ECO:0000313|EMBL:CBI22109.3} OS=Vitis vinifera (Grape) PE=4 SV=1	PREDICTED: pentatricopeptide repeat-containing protein At1g11900 [Vitis vinifera]
Vad12G012710.1	Molecular Function: 1-phosphatidylinositol binding (GO:0005545);; Cellular Component: clathrin coat (GO:0030118);; Molecular Function: clathrin binding (GO:0030276);; Molecular Function: 2-alkenal reductase [NAD(P)] activity (GO:0032440);; Biological Process: clathrin coat assembly (GO:0048268);; Biological Process: oxidation-reduction process (GO:0055114);;	--	[TU]	--	Putative uncharacterized protein {ECO:0000313|EMBL:CCB46154.1} OS=Vitis vinifera (Grape) PE=4 SV=1	PREDICTED: putative clathrin assembly protein At1g03050 [Vitis vinifera]
Vad17G002150.1	Cellular Component: cytoplasm (GO:0005737);; Biological Process: lipid metabolic process (GO:0006629);; Cellular Component: integral component of membrane (GO:0016021);; Molecular Function: oxidoreductase activity, acting on the CH-CH group of donors (GO:0016627);;	--	[R]	General function prediction only	Putative uncharacterized protein {ECO:0000313|EMBL:CBI15557.3} OS=Vitis vinifera (Grape) PE=4 SV=1	PREDICTED: uncharacterized protein LOC100853969 isoform X2 [Vitis vinifera]
Vad07G004030.1	Cellular Component: cytoplasm (GO:0005737);; Molecular Function: metal ion binding (GO:0046872);;	K14801|0|vvi:100241925|K14801 pre-rRNA-processing protein TSR4 | (RefSeq) programmed cell death protein 2	[R]	General function prediction only	Putative uncharacterized protein {ECO:0000313|EMBL:CCB59988.1} OS=Vitis vinifera (Grape) PE=4 SV=1	unnamed protein product [Vitis vinifera]
Vad06G009430.1	Molecular Function: calmodulin-dependent protein kinase activity (GO:0004683);; Molecular Function: calcium ion binding (GO:0005509);; Molecular Function: ATP binding (GO:0005524);; Biological Process: protein phosphorylation (GO:0006468);;	K13412|0|vvi:100251670|K13412 calcium-dependent protein kinase [EC:2.7.11.1] | (RefSeq) calcium-dependent protein kinase 34	[T]	Signal transduction mechanisms	Putative uncharacterized protein {ECO:0000313|EMBL:CCB49061.1} OS=Vitis vinifera (Grape) PE=4 SV=1	PREDICTED: calcium-dependent protein kinase 34-like [Vitis vinifera]
Vad08G008250.1	Molecular Function: cyclin-dependent protein serine/threonine kinase activity (GO:0004693);; Cellular Component: nucleus (GO:0005634);; Biological Process: embryo development (GO:0009790);; Biological Process: regulation of cell cycle (GO:0051726);;	K18813|0|vvi:100263149|K18813 cyclin D7, plant | (RefSeq) putative cyclin-D7-1	[D]	Cell cycle control, cell division, chromosome partitioning	Putative uncharacterized protein {ECO:0000313|EMBL:CBI30518.3} OS=Vitis vinifera (Grape) PE=3 SV=1	PREDICTED: putative cyclin-D7-1 [Vitis vinifera]
Vad14G013730.1	Molecular Function: aldose 1-epimerase activity (GO:0004034);; Biological Process: hexose metabolic process (GO:0019318);; Molecular Function: carbohydrate binding (GO:0030246);;	K01785|0|vvi:100245569|K01785 aldose 1-epimerase [EC:5.1.3.3] | (RefSeq) aldose 1-epimerase	[G]	Carbohydrate transport and metabolism	Aldose 1-epimerase {ECO:0000256|PIRNR:PIRNR005096} OS=Vitis vinifera (Grape) PE=3 SV=1	unnamed protein product [Vitis vinifera]
Vad17G007960.1	Molecular Function: binding (GO:0005488);; Molecular Function: pyrophosphatase activity (GO:0016462);;	K14641|2.35101e-98|vvi:100267968|K14641 apyrase [EC:3.6.1.5] | (RefSeq) apyrase 2	[F]	Nucleotide transport and metabolism	Putative uncharacterized protein {ECO:0000313|EMBL:CBI24778.3} OS=Vitis vinifera (Grape) PE=3 SV=1	PREDICTED: apyrase 2 [Vitis vinifera]
Vad03G005190.1	Molecular Function: DNA binding (GO:0003677);; Cellular Component: nucleus (GO:0005634);; Biological Process: regulation of transcription, DNA-templated (GO:0006355);; Cellular Component: cytochrome b6f complex (GO:0009512);;	--	--	--	Putative uncharacterized protein {ECO:0000313|EMBL:CCB56915.1} OS=Vitis vinifera (Grape) PE=3 SV=1	unnamed protein product [Vitis vinifera]
Vad07G017970.1	--	--	[O]	Posttranslational modification, protein turnover, chaperones	Uncharacterized protein {ECO:0000313|EMBL:EYU39425.1} OS=Erythranthe guttata (Yellow monkey flower) PE=4 SV=1	PREDICTED: nuclear pore complex protein Nup214-like [Vitis vinifera]
Vad0G018260.1	Cellular Component: plasma membrane (GO:0005886);; Biological Process: proteolysis (GO:0006508);; Molecular Function: cysteine-type peptidase activity (GO:0008234);;	--	--	--	Putative uncharacterized protein {ECO:0000313|EMBL:CBI24805.3} OS=Vitis vinifera (Grape) PE=4 SV=1	unnamed protein product [Vitis vinifera]
Vad0G012030.1	Molecular Function: nucleotide binding (GO:0000166);; Molecular Function: DNA topoisomerase activity (GO:0003916);; Cellular Component: plastid (GO:0009536);;	--	[B]	Chromatin structure and dynamics	Stackhouse genomic scaffold, scaffold_123 {ECO:0000313|EMBL:CDF33270.1} OS=Chondrus crispus (Carragheen moss) PE=3 SV=1	DNA gyrase subunit B [Beauveria bassiana D1-5]
Vad13G007840.1	--	--	--	--	Putative uncharacterized protein {ECO:0000313|EMBL:CBI29101.3} OS=Vitis vinifera (Grape) PE=4 SV=1	unnamed protein product [Vitis vinifera]
Vad04G001000.1	Molecular Function: protein kinase activity (GO:0004672);; Molecular Function: ATP binding (GO:0005524);; Biological Process: protein phosphorylation (GO:0006468);; Cellular Component: integral component of membrane (GO:0016021);;	--	--	--	Putative uncharacterized protein {ECO:0000313|EMBL:CCB46569.1} OS=Vitis vinifera (Grape) PE=4 SV=1	PREDICTED: probable leucine-rich repeat receptor-like protein kinase At1g68400 [Vitis vinifera]
Vad07G019230.1	Cellular Component: anaphase-promoting complex (GO:0005680);; Biological Process: embryo sac egg cell differentiation (GO:0009560);; Biological Process: regulation of mitotic metaphase/anaphase transition (GO:0030071);; Biological Process: regulation of defense response (GO:0031347);; Biological Process: regulation of DNA endoreduplication (GO:0032875);; Biological Process: obsolete transcription…	K03355|0|vvi:100249407|K03355 anaphase-promoting complex subunit 8 | (RefSeq) anaphase-promoting complex subunit 8	[DO]	--	Putative uncharacterized protein {ECO:0000313|EMBL:CCB51353.1} OS=Vitis vinifera (Grape) PE=4 SV=1	PREDICTED: anaphase-promoting complex subunit 8 [Vitis vinifera]
Vad16G007140.1	Molecular Function: proline-tRNA ligase activity (GO:0004827);; Molecular Function: ATP binding (GO:0005524);; Cellular Component: mitochondrion (GO:0005739);; Biological Process: prolyl-tRNA aminoacylation (GO:0006433);; Biological Process: embryo sac development (GO:0009553);; Cellular Component: chloroplast stroma (GO:0009570);; Biological Process: chloroplast organization (GO:0009658);; Biolo…	K01881|0|vvi:100262997|K01881 prolyl-tRNA synthetase [EC:6.1.1.15] | (RefSeq) proline--tRNA ligase, chloroplastic/mitochondrial	[J]	Translation, ribosomal structure and biogenesis	Putative uncharacterized protein {ECO:0000313|EMBL:CBI22672.3} OS=Vitis vinifera (Grape) PE=3 SV=1	PREDICTED: proline--tRNA ligase [Vitis vinifera]
Vad14G000320.1	Biological Process: tryptophan catabolic process (GO:0006569);; Biological Process: response to symbiotic fungus (GO:0009610);; Biological Process: indoleacetic acid biosynthetic process (GO:0009684);; Biological Process: cysteine biosynthetic process (GO:0019344);; Molecular Function: pyridoxal phosphate binding (GO:0030170);; Molecular Function: isopenicillin-N epimerase activity (GO:0045439);;…	--	[E]	Amino acid transport and metabolism	Putative uncharacterized protein {ECO:0000313|EMBL:CCB61963.1} OS=Vitis vinifera (Grape) PE=3 SV=1	PREDICTED: L-cysteine desulfhydrase [Vitis vinifera]
Vad13G009930.1	Molecular Function: protein serine/threonine kinase activity (GO:0004674);; Molecular Function: ATP binding (GO:0005524);; Biological Process: protein phosphorylation (GO:0006468);; Biological Process: defense response (GO:0006952);; Molecular Function: ADP binding (GO:0043531);;	K15078|0|vvi:100255136|K15078 structure-specific endonuclease subunit SLX1 [EC:3.6.1.-] | (RefSeq) putative disease resistance protein RGA1	[T]	Signal transduction mechanisms	Putative uncharacterized protein {ECO:0000313|EMBL:CAN82122.1} OS=Vitis vinifera (Grape) PE=4 SV=1	hypothetical protein VITISV_009093 [Vitis vinifera]
Vad10G001290.1	--	K15152|8.5863e-81|spen:107009075|K15152 mediator of RNA polymerase II transcription subunit 21 | (RefSeq) mediator of RNA polymerase II transcription subunit 21	[K]	Transcription	Uncharacterized protein {ECO:0000313|EnsemblPlants:PGSC0003DMT400042445} OS=Solanum tuberosum (Potato) PE=4 SV=1	PREDICTED: mediator of RNA polymerase II transcription subunit 21 isoform X1 [Nelumbo nucifera]
Vad04G009740.1	Biological Process: rRNA processing (GO:0006364);; Biological Process: translational termination (GO:0006415);; Cellular Component: chloroplast stroma (GO:0009570);; Biological Process: chloroplast relocation (GO:0009902);; Biological Process: leaf morphogenesis (GO:0009965);; Biological Process: thylakoid membrane organization (GO:0010027);; Biological Process: photosystem II assembly (GO:001020…	K02836|0|vvi:100265078|K02836 peptide chain release factor 2 | (RefSeq) peptide chain release factor PrfB1, chloroplastic	[J]	Translation, ribosomal structure and biogenesis	Putative uncharacterized protein {ECO:0000313|EMBL:CBI17600.3} OS=Vitis vinifera (Grape) PE=4 SV=1	PREDICTED: peptide chain release factor PrfB1, chloroplastic [Vitis vinifera]
Vad12G008250.1	Biological Process: defense response (GO:0006952);; Biological Process: signal transduction (GO:0007165);; Molecular Function: ADP binding (GO:0043531);;	--	--	--	Putative uncharacterized protein {ECO:0000313|EMBL:CCB57232.1} OS=Vitis vinifera (Grape) PE=4 SV=1	PREDICTED: TMV resistance protein N-like [Vitis vinifera]
Vad18G018730.1	Molecular Function: oxidoreductase activity, acting on the CH-OH group of donors, NAD or NADP as acceptor (GO:0016616);; Molecular Function: NAD binding (GO:0051287);; Biological Process: oxidation-reduction process (GO:0055114);;	--	[C]	Energy production and conversion	Putative uncharacterized protein {ECO:0000313|EMBL:CBI39250.3} OS=Vitis vinifera (Grape) PE=3 SV=1	PREDICTED: glyoxylate/hydroxypyruvate reductase A HPR2 isoform X1 [Vitis vinifera]
Vad18G013470.1	--	K05909|0|vvi:100262116|K05909 laccase [EC:1.10.3.2] | (RefSeq) putative laccase-9	[Q]	Secondary metabolites biosynthesis, transport and catabolism	Laccase {ECO:0000256|RuleBase:RU361119} OS=Vitis vinifera (Grape) PE=3 SV=1	unnamed protein product [Vitis vinifera]
Vad12G003410.1	--	--	[R]	General function prediction only	Putative uncharacterized protein {ECO:0000313|EMBL:CCB51933.1} OS=Vitis vinifera (Grape) PE=4 SV=1	PREDICTED: ankyrin repeat-containing protein At3g12360-like isoform X3 [Vitis vinifera]
Vad09G001920.1	Molecular Function: nucleotide binding (GO:0000166);; Molecular Function: RNA binding (GO:0003723);; Cellular Component: ribonucleoprotein complex (GO:0030529);;	K12741|0|vvi:100266965|K12741 heterogeneous nuclear ribonucleoprotein A1/A3 | (RefSeq) heterogeneous nuclear ribonucleoprotein 1	[R]	General function prediction only	Putative uncharacterized protein {ECO:0000313|EMBL:CBI35964.3} OS=Vitis vinifera (Grape) PE=4 SV=1	PREDICTED: heterogeneous nuclear ribonucleoprotein 1 [Vitis vinifera]
Vad18G011590.1	Cellular Component: cytoplasm (GO:0005737);; Molecular Function: zinc ion binding (GO:0008270);; Biological Process: protein ubiquitination (GO:0016567);;	K11982|0|vvi:100250690|K11982 E3 ubiquitin-protein ligase RNF115/126 [EC:2.3.2.27] | (RefSeq) E3 ubiquitin-protein ligase CIP8-like	[O]	Posttranslational modification, protein turnover, chaperones	Putative uncharacterized protein {ECO:0000313|EMBL:CAN66109.1} OS=Vitis vinifera (Grape) PE=4 SV=1	PREDICTED: E3 ubiquitin-protein ligase CIP8 [Vitis vinifera]
Vad09G010400.1	--	--	[R]	General function prediction only	Uncharacterized protein {ECO:0000313|EnsemblPlants:PGSC0003DMT400035156} OS=Solanum tuberosum (Potato) PE=4 SV=1	PREDICTED: uncharacterized protein LOC104880028 [Vitis vinifera]
Vad08G005170.1	Molecular Function: nucleotide binding (GO:0000166);; Molecular Function: protein kinase activity (GO:0004672);; Biological Process: phosphorylation (GO:0016310);;	K07198|0|vvi:100243154|K07198 5'-AMP-activated protein kinase, catalytic alpha subunit [EC:2.7.11.11] | (RefSeq) SNF1-related protein kinase catalytic subunit alpha KIN10	[T]	Signal transduction mechanisms	Putative uncharacterized protein {ECO:0000313|EMBL:CCB57135.1} OS=Vitis vinifera (Grape) PE=4 SV=1	PREDICTED: SNF1-related protein kinase catalytic subunit alpha KIN10-like [Vitis vinifera]
Vad01G014690.1	Molecular Function: DNA binding (GO:0003677);; Molecular Function: DNA-binding transcription factor activity (GO:0003700);; Cellular Component: nucleus (GO:0005634);; Biological Process: regulation of transcription, DNA-templated (GO:0006355);;	--	--	--	Putative uncharacterized protein {ECO:0000313|EMBL:CBI29260.3} OS=Vitis vinifera (Grape) PE=4 SV=1	PREDICTED: ethylene-responsive transcription factor ERF113 [Vitis vinifera]
Vad0G021490.1	Molecular Function: nucleotide binding (GO:0000166);; Molecular Function: RNA binding (GO:0003723);; Cellular Component: nucleus (GO:0005634);; Biological Process: RNA processing (GO:0006396);; Cellular Component: ribonucleoprotein complex (GO:0030529);;	K11090|1.56425e-89|vvi:100250699|K11090 lupus La protein | (RefSeq) la protein 1	[R]	General function prediction only	Putative uncharacterized protein {ECO:0000313|EMBL:CAN66913.1} OS=Vitis vinifera (Grape) PE=4 SV=1	unnamed protein product [Vitis vinifera]
Vad14G001270.1	Molecular Function: oxidoreductase activity, acting on a sulfur group of donors, NAD(P) as acceptor (GO:0016668);; Biological Process: oxidation-reduction process (GO:0055114);;	--	[R]	General function prediction only	Putative uncharacterized protein {ECO:0000313|EMBL:CBI39576.3} OS=Vitis vinifera (Grape) PE=4 SV=1	PREDICTED: pentatricopeptide repeat-containing protein At5g16420, mitochondrial isoform X1 [Vitis vinifera]
Vad16G009820.1	--	--	--	--	Putative uncharacterized protein {ECO:0000313|EMBL:CCB48066.1} OS=Vitis vinifera (Grape) PE=4 SV=1	unnamed protein product [Vitis vinifera]
Vad11G006530.1	Molecular Function: protein serine/threonine kinase activity (GO:0004674);; Molecular Function: protein tyrosine kinase activity (GO:0004713);; Molecular Function: ATP binding (GO:0005524);; Biological Process: protein phosphorylation (GO:0006468);; Biological Process: transmembrane receptor protein tyrosine kinase signaling pathway (GO:0007169);; Cellular Component: integral component of membran…	--	--	--	Putative uncharacterized protein {ECO:0000313|EMBL:CCB49946.1} OS=Vitis vinifera (Grape) PE=4 SV=1	PREDICTED: leucine-rich repeat receptor-like protein kinase TDR [Vitis vinifera]
Vad0G009340.1	--	--	--	--	Uncharacterized protein {ECO:0000313|EMBL:EQC35984.1} OS=Saprolegnia diclina VS20 PE=4 SV=1	hypothetical protein SDRG_06726 [Saprolegnia diclina VS20]
Vad07G015010.1	Cellular Component: mitochondrial outer membrane (GO:0005741);; Molecular Function: voltage-gated anion channel activity (GO:0008308);; Biological Process: regulation of anion transport (GO:0044070);; Biological Process: transmembrane transport (GO:0055085);;	K15040|0|vvi:100266220|K15040 voltage-dependent anion channel protein 2 | (RefSeq) mitochondrial outer membrane protein porin 2	[P]	Inorganic ion transport and metabolism	Putative uncharacterized protein {ECO:0000313|EMBL:CAN75907.1} OS=Vitis vinifera (Grape) PE=4 SV=1	PREDICTED: mitochondrial outer membrane protein porin 2 [Vitis vinifera]
Vad02G001560.1	Molecular Function: carboxylic ester hydrolase activity (GO:0004091);; Biological Process: lipid metabolic process (GO:0006629);;	--	--	--	Putative uncharacterized protein {ECO:0000313|EMBL:CCB58252.1} OS=Vitis vinifera (Grape) PE=4 SV=1	unnamed protein product [Vitis vinifera]
Vad19G007420.1	Molecular Function: aspartic-type endopeptidase activity (GO:0004190);; Cellular Component: nucleus (GO:0005634);; Cellular Component: cytosol (GO:0005829);; Biological Process: protein glycosylation (GO:0006486);; Biological Process: proteolysis (GO:0006508);; Biological Process: response to cadmium ion (GO:0046686);;	K11885|0|vvi:100248128|K11885 DNA damage-inducible protein 1 | (RefSeq) DNA damage-inducible protein 1	[L]	Replication, recombination and repair	Putative uncharacterized protein {ECO:0000313|EMBL:CBI39822.3} OS=Vitis vinifera (Grape) PE=4 SV=1	PREDICTED: DNA damage-inducible protein 1 [Vitis vinifera]
Vad15G004610.1	Cellular Component: intracellular (GO:0005622);; Molecular Function: zinc ion binding (GO:0008270);;	--	--	--	Putative uncharacterized protein {ECO:0000313|EMBL:CBI38881.3} OS=Vitis vinifera (Grape) PE=4 SV=1	PREDICTED: uncharacterized protein LOC100248806 [Vitis vinifera]
Vad16G000550.1	Molecular Function: phosphoenolpyruvate carboxykinase (ATP) activity (GO:0004612);; Molecular Function: ATP binding (GO:0005524);; Biological Process: gluconeogenesis (GO:0006094);; Biological Process: rRNA processing (GO:0006364);; Cellular Component: small-subunit processome (GO:0032040);;	--	--	--	Putative uncharacterized protein {ECO:0000313|EMBL:CBI26488.3} OS=Vitis vinifera (Grape) PE=4 SV=1	PREDICTED: uncharacterized protein LOC100244219 [Vitis vinifera]
Vad07G010740.1	--	--	--	--	Putative uncharacterized protein {ECO:0000313|EMBL:CCB52116.1} OS=Vitis vinifera (Grape) PE=4 SV=1	--
Vad10G010610.1	--	K20798|0|vvi:100259382|K20798 small RNA 2'-O-methyltransferase [EC:2.1.1.-] | (RefSeq) small RNA 2'-O-methyltransferase	[S]	Function unknown	Putative uncharacterized protein {ECO:0000313|EMBL:CCB55862.1} OS=Vitis vinifera (Grape) PE=4 SV=1	PREDICTED: small RNA 2&apos;-O-methyltransferase-like [Vitis vinifera]
Vad07G015650.1	Molecular Function: protein serine/threonine kinase activity (GO:0004674);; Molecular Function: ATP binding (GO:0005524);; Biological Process: protein phosphorylation (GO:0006468);;	--	[T]	Signal transduction mechanisms	Putative uncharacterized protein {ECO:0000313|EMBL:CCB57790.1} OS=Vitis vinifera (Grape) PE=3 SV=1	PREDICTED: probable receptor-like protein kinase At5g24010 [Vitis vinifera]
Vad07G016600.1	--	--	--	--	Putative uncharacterized protein {ECO:0000313|EMBL:CAN61148.1} OS=Vitis vinifera (Grape) PE=4 SV=1	hypothetical protein VITISV_029171 [Vitis vinifera]
Vad07G009440.1	--	--	--	--	Putative uncharacterized protein {ECO:0000313|EMBL:CCB52386.1} OS=Vitis vinifera (Grape) PE=4 SV=1	PREDICTED: TMV resistance protein N-like [Vitis vinifera]
Vad17G005640.1	--	--	[R]	General function prediction only	Putative uncharacterized protein {ECO:0000313|EMBL:CBI15232.3} OS=Vitis vinifera (Grape) PE=4 SV=1	PREDICTED: putative pentatricopeptide repeat-containing protein At1g74580 [Vitis vinifera]
Vad10G012030.1	Molecular Function: RNA binding (GO:0003723);; Molecular Function: RNA-directed DNA polymerase activity (GO:0003964);; Biological Process: RNA-dependent DNA biosynthetic process (GO:0006278);;	--	--	--	Putative uncharacterized protein {ECO:0000313|EMBL:CBI20560.3} OS=Vitis vinifera (Grape) PE=4 SV=1	PREDICTED: uncharacterized protein LOC100242682 [Vitis vinifera]
Vad10G014450.1	Molecular Function: RNA binding (GO:0003723);; Molecular Function: RNA-directed DNA polymerase activity (GO:0003964);; Biological Process: RNA-dependent DNA biosynthetic process (GO:0006278);; Molecular Function: zinc ion binding (GO:0008270);; Biological Process: DNA integration (GO:0015074);;	--	--	--	Putative uncharacterized protein {ECO:0000313|EMBL:CCB57263.1} OS=Vitis vinifera (Grape) PE=4 SV=1	hypothetical protein VITISV_001649 [Vitis vinifera]
Vad02G000080.1	Molecular Function: DNA binding (GO:0003677);; Molecular Function: ATP-dependent DNA helicase activity (GO:0004003);; Molecular Function: ATP binding (GO:0005524);; Biological Process: nucleotide-excision repair (GO:0006289);;	K10843|0|vvi:100250174|K10843 DNA excision repair protein ERCC-3 [EC:3.6.4.12] | (RefSeq) DNA repair helicase XPB1	[KL]	--	Putative uncharacterized protein {ECO:0000313|EMBL:CCB58185.1} OS=Vitis vinifera (Grape) PE=4 SV=1	PREDICTED: DNA repair helicase XPB1 [Vitis vinifera]
Vad13G007970.1	--	K14404|0|vvi:100252331|K14404 cleavage and polyadenylation specificity factor subunit 4 | (RefSeq) uncharacterized LOC100252331	--	--	Putative uncharacterized protein {ECO:0000313|EMBL:CAN73830.1} OS=Vitis vinifera (Grape) PE=4 SV=1	PREDICTED: uncharacterized protein LOC100252331 isoform X1 [Vitis vinifera]
Vad14G001890.1	Molecular Function: structural constituent of ribosome (GO:0003735);; Biological Process: translation (GO:0006412);; Cellular Component: cytosolic small ribosomal subunit (GO:0022627);;	K02971|7.20763e-56|vvi:100246017|K02971 small subunit ribosomal protein S21e | (RefSeq) 40S ribosomal protein S21	[J]	Translation, ribosomal structure and biogenesis	Putative uncharacterized protein {ECO:0000313|EMBL:CCB61865.1} OS=Vitis vinifera (Grape) PE=4 SV=1	PREDICTED: 40S ribosomal protein S21 [Vitis vinifera]
Vad0G001080.1	Molecular Function: transferase activity (GO:0016740);; Cellular Component: intracellular membrane-bounded organelle (GO:0043231);; Cellular Component: cytoplasmic part (GO:0044444);;	K03046|5.11457e-100|cme:CymeCp185|K03046 DNA-directed RNA polymerase subunit beta' [EC:2.7.7.6] | (RefSeq) rpoC; RNA polymerase beta' chain	--	--	DNA-directed RNA polymerase {ECO:0000256|RuleBase:RU004279} OS=Pyropia fucicola PE=3 SV=1	RNA polymerase beta&apos; chain [Rhodomonas salina]
Vad06G007100.1	Molecular Function: RNA binding (GO:0003723);;	K14945|0|vvi:100245080|K14945 protein quaking | (RefSeq) KH domain-containing protein At3g08620	[A]	RNA processing and modification	Putative uncharacterized protein {ECO:0000313|EMBL:CAN61397.1} OS=Vitis vinifera (Grape) PE=4 SV=1	hypothetical protein VITISV_015779 [Vitis vinifera]
Vad19G008840.1	Cellular Component: integral component of membrane (GO:0016021);;	K15015|0|vvi:100242701|K15015 solute carrier family 32 (vesicular inhibitory amino acid transporter) | (RefSeq) vacuolar amino acid transporter 1-like	[E]	Amino acid transport and metabolism	Putative uncharacterized protein {ECO:0000313|EMBL:CAN75006.1} OS=Vitis vinifera (Grape) PE=4 SV=1	PREDICTED: vacuolar amino acid transporter 1 [Vitis vinifera]
Vad19G010440.1	--	--	--	--	Putative uncharacterized protein {ECO:0000313|EMBL:CCB59337.1} OS=Vitis vinifera (Grape) PE=4 SV=1	unnamed protein product [Vitis vinifera]
Vad03G001220.1	Biological Process: defense response (GO:0006952);; Molecular Function: ADP binding (GO:0043531);;	--	[T]	Signal transduction mechanisms	Putative uncharacterized protein {ECO:0000313|EMBL:CAN71249.1} OS=Vitis vinifera (Grape) PE=4 SV=1	unnamed protein product [Vitis vinifera]
Vad05G006710.1	Molecular Function: DNA binding (GO:0003677);; Molecular Function: protein dimerization activity (GO:0046983);;	--	--	--	Putative uncharacterized protein {ECO:0000313|EMBL:CAN75829.1} OS=Vitis vinifera (Grape) PE=4 SV=1	PREDICTED: uncharacterized protein LOC104881890 [Vitis vinifera]
Vad17G005960.1	Molecular Function: DNA binding (GO:0003677);; Biological Process: regulation of transcription, DNA-templated (GO:0006355);;	--	--	--	Putative uncharacterized protein {ECO:0000313|EMBL:CAN69806.1} OS=Vitis vinifera (Grape) PE=4 SV=1	PREDICTED: NAC domain-containing protein 100 [Vitis vinifera]
Vad18G007750.1	Molecular Function: RNA binding (GO:0003723);; Molecular Function: transferase activity, transferring acyl groups other than amino-acyl groups (GO:0016747);;	--	--	--	Putative uncharacterized protein {ECO:0000313|EMBL:CCB45825.1} OS=Vitis vinifera (Grape) PE=4 SV=1	PREDICTED: uncharacterized acetyltransferase At3g50280-like [Vitis vinifera]
Vad06G004520.1	Biological Process: metabolic process (GO:0008152);; Molecular Function: serine-type peptidase activity (GO:0008236);;	--	--	--	Putative uncharacterized protein {ECO:0000313|EMBL:CCB43528.1} OS=Vitis vinifera (Grape) PE=4 SV=1	unnamed protein product [Vitis vinifera]
Vad03G002320.1	Cellular Component: mitochondrion (GO:0005739);; Biological Process: aromatic amino acid family biosynthetic process (GO:0009073);; Biological Process: iron-sulfur cluster assembly (GO:0016226);;	--	[R]	General function prediction only	Putative uncharacterized protein {ECO:0000313|EMBL:CBI37819.3} OS=Vitis vinifera (Grape) PE=4 SV=1	PREDICTED: pentatricopeptide repeat-containing protein At2g17033 [Vitis vinifera]
Vad0G012730.1	--	--	--	--	Putative uncharacterized protein {ECO:0000313|EMBL:CCB59101.1} OS=Vitis vinifera (Grape) PE=4 SV=1	hypothetical protein VITISV_030392 [Vitis vinifera]
Vad0G013960.1	Molecular Function: ligase activity (GO:0016874);; Biological Process: cellular modified amino acid biosynthetic process (GO:0042398);;	--	--	--	Glutamate--cysteine ligase, chloroplast, putative {ECO:0000313|EMBL:EEF23677.1} OS=Ricinus communis (Castor bean) PE=4 SV=1	Glutamate--cysteine ligase, chloroplast precursor, putative [Ricinus communis]
Vad15G004800.1	Molecular Function: AT DNA binding (GO:0003680);; Cellular Component: nucleus (GO:0005634);; Biological Process: photomorphogenesis (GO:0009640);; Biological Process: skotomorphogenesis (GO:0009647);; Biological Process: vegetative to reproductive phase transition of meristem (GO:0010228);;	--	--	--	Putative uncharacterized protein {ECO:0000313|EMBL:CAN81187.1} OS=Vitis vinifera (Grape) PE=4 SV=1	PREDICTED: putative DNA-binding protein ESCAROLA [Vitis vinifera]
Vad18G004340.1	Molecular Function: nucleotide binding (GO:0000166);; Molecular Function: nucleic acid binding (GO:0003676);;	--	[R]	General function prediction only	Putative uncharacterized protein {ECO:0000313|EMBL:CBI19171.3} OS=Vitis vinifera (Grape) PE=4 SV=1	PREDICTED: RNA-binding protein 38 isoform X1 [Vitis vinifera]
Vad07G005370.1	--	--	[R]	General function prediction only	Putative uncharacterized protein {ECO:0000313|EMBL:CCB60055.1} OS=Vitis vinifera (Grape) PE=4 SV=1	PREDICTED: uncharacterized protein LOC100257191 isoform X1 [Vitis vinifera]
Vad10G011620.1	Cellular Component: cytoplasm (GO:0005737);; Molecular Function: pyrophosphatase activity (GO:0016462);;	K01514|4.59214e-63|vvi:100854333|K01514 exopolyphosphatase [EC:3.6.1.11] | (RefSeq) protein prune homolog	--	--	Putative uncharacterized protein {ECO:0000313|EMBL:CBI39018.3} OS=Vitis vinifera (Grape) PE=4 SV=1	unnamed protein product [Vitis vinifera]
Vad10G001670.1	--	--	--	--	Putative uncharacterized protein {ECO:0000313|EMBL:CBI18767.3} OS=Vitis vinifera (Grape) PE=4 SV=1	unnamed protein product [Vitis vinifera]
Vad11G009210.1	Molecular Function: zinc ion binding (GO:0008270);; Molecular Function: oxidoreductase activity (GO:0016491);; Biological Process: oxidation-reduction process (GO:0055114);;	--	[R]	General function prediction only	Putative uncharacterized protein {ECO:0000313|EMBL:CCB44676.1} OS=Vitis vinifera (Grape) PE=4 SV=1	PREDICTED: 2-alkenal reductase (NADP(+)-dependent)-like [Vitis vinifera]
Vad08G013980.1	--	--	--	--	Putative uncharacterized protein {ECO:0000313|EMBL:CCB55221.1} OS=Vitis vinifera (Grape) PE=4 SV=1	unnamed protein product [Vitis vinifera]
Vad18G006810.1	Molecular Function: carboxylic ester hydrolase activity (GO:0004091);; Biological Process: secondary shoot formation (GO:0010223);; Molecular Function: retinyl-palmitate esterase activity (GO:0050253);; Molecular Function: methyl indole-3-acetate esterase activity (GO:0080030);; Molecular Function: methyl salicylate esterase activity (GO:0080031);; Molecular Function: methyl jasmonate esterase ac…	--	--	--	Putative uncharacterized protein {ECO:0000313|EMBL:CCB45753.1} OS=Vitis vinifera (Grape) PE=4 SV=1	PREDICTED: probable strigolactone esterase DAD2 [Vitis vinifera]
Vad18G004630.1	Molecular Function: transcription regulatory region sequence-specific DNA binding (GO:0000976);; Molecular Function: DNA-binding transcription factor activity (GO:0003700);; Cellular Component: nucleus (GO:0005634);; Biological Process: regulation of transcription, DNA-templated (GO:0006355);;	K09338|0|vvi:100255823|K09338 homeobox-leucine zipper protein | (RefSeq) homeobox-leucine zipper protein ATHB-6	[K]	Transcription	Putative uncharacterized protein {ECO:0000313|EMBL:CCB45600.1} OS=Vitis vinifera (Grape) PE=4 SV=1	PREDICTED: homeobox-leucine zipper protein ATHB-6-like [Vitis vinifera]
Vad08G003380.1	Molecular Function: DNA binding (GO:0003677);; Molecular Function: chromatin binding (GO:0003682);;	--	--	--	Putative uncharacterized protein {ECO:0000313|EMBL:CAN73581.1} OS=Vitis vinifera (Grape) PE=4 SV=1	PREDICTED: putative Myb family transcription factor At1g14600 [Vitis vinifera]
Vad03G010130.1	--	--	--	--	Uncharacterized protein {ECO:0000313|EMBL:KDP40971.1} OS=Jatropha curcas (Barbados nut) PE=4 SV=1	PREDICTED: RNA-binding protein 12-like [Vitis vinifera]
Vad12G009860.1	--	--	[R]	General function prediction only	Putative uncharacterized protein {ECO:0000313|EMBL:CCB48678.1} OS=Vitis vinifera (Grape) PE=4 SV=1	PREDICTED: pentatricopeptide repeat-containing protein ELI1, chloroplastic-like [Vitis vinifera]
Vad18G020530.1	--	--	--	--	Putative uncharacterized protein {ECO:0000313|EMBL:CBI18259.3} OS=Vitis vinifera (Grape) PE=4 SV=1	unnamed protein product [Vitis vinifera]
Vad13G013350.1	Molecular Function: nucleotide binding (GO:0000166);; Molecular Function: protein kinase activity (GO:0004672);; Cellular Component: membrane (GO:0016020);; Biological Process: phosphorylation (GO:0016310);;	--	--	--	Putative uncharacterized protein {ECO:0000313|EMBL:CCB58634.1} OS=Vitis vinifera (Grape) PE=4 SV=1	PREDICTED: probable leucine-rich repeat receptor-like protein kinase At1g35710 [Vitis vinifera]
Vad06G001270.1	Molecular Function: copper ion binding (GO:0005507);; Biological Process: glycolytic process (GO:0006096);; Biological Process: water transport (GO:0006833);; Biological Process: hyperosmotic response (GO:0006972);; Biological Process: Golgi organization (GO:0007030);; Biological Process: response to temperature stimulus (GO:0009266);; Cellular Component: chloroplast stroma (GO:0009570);; Biologi…	K00392|0|vvi:100245032|K00392 sulfite reductase (ferredoxin) [EC:1.8.7.1] | (RefSeq) sulfite reductase 1 [ferredoxin], chloroplastic	[P]	Inorganic ion transport and metabolism	Putative uncharacterized protein {ECO:0000313|EMBL:CBI16358.3} OS=Vitis vinifera (Grape) PE=4 SV=1	PREDICTED: sulfite reductase 1 [ferredoxin], chloroplastic [Vitis vinifera]
Vad18G018210.1	--	--	--	--	Putative uncharacterized protein {ECO:0000313|EMBL:CBI38555.3} OS=Vitis vinifera (Grape) PE=4 SV=1	unnamed protein product [Vitis vinifera]
Vad18G006550.1	--	K05853|0|vvi:100266003|K05853 Ca2+ transporting ATPase, sarcoplasmic/endoplasmic reticulum [EC:3.6.3.8] | (RefSeq) calcium-transporting ATPase 3, endoplasmic reticulum-type	[P]	Inorganic ion transport and metabolism	Calcium-transporting ATPase {ECO:0000256|RuleBase:RU361146} OS=Vitis vinifera (Grape) PE=3 SV=1	PREDICTED: calcium-transporting ATPase 3, endoplasmic reticulum-type isoform X1 [Vitis vinifera]
Vad04G013000.1	--	K10664|2.86802e-135|vvi:104877822|K10664 E3 ubiquitin-protein ligase ATL6/9/15/31/42/55 [EC:2.3.2.27] | (RefSeq) RING-H2 finger protein ATL11-like	[O]	Posttranslational modification, protein turnover, chaperones	Putative uncharacterized protein {ECO:0000313|EMBL:CCB45608.1} OS=Vitis vinifera (Grape) PE=4 SV=1	PREDICTED: LOW QUALITY PROTEIN: RING-H2 finger protein ATL11-like [Vitis vinifera]
Vad03G004390.1	Molecular Function: GTP binding (GO:0005525);; Cellular Component: nucleus (GO:0005634);; Cellular Component: plasma membrane (GO:0005886);; Biological Process: response to oxidative stress (GO:0006979);; Biological Process: small GTPase mediated signal transduction (GO:0007264);; Biological Process: response to salt stress (GO:0009651);; Biological Process: protein transport (GO:0015031);; Molec…	K07897|1.37457e-151|vvi:100853135|K07897 Ras-related protein Rab-7A | (RefSeq) ras-related protein Rab7	[R]	General function prediction only	Putative uncharacterized protein {ECO:0000313|EMBL:CAN61313.1} OS=Vitis vinifera (Grape) PE=3 SV=1	PREDICTED: ras-related protein Rab7 [Vitis vinifera]
Vad0G019120.1	--	--	--	--	Predicted protein {ECO:0000313|EMBL:EDQ53993.1} OS=Physcomitrella patens subsp. patens (Moss) PE=3 SV=1	hypothetical protein SMAC_10390 [Sordaria macrospora k-hell]
Vad17G007310.1	Molecular Function: DNA binding (GO:0003677);; Molecular Function: metal ion binding (GO:0046872);; Molecular Function: protein dimerization activity (GO:0046983);;	--	--	--	Putative uncharacterized protein {ECO:0000313|EMBL:CAN62465.1} OS=Vitis vinifera (Grape) PE=4 SV=1	PREDICTED: uncharacterized protein LOC104880372 [Vitis vinifera]
Vad02G005100.1	Molecular Function: monooxygenase activity (GO:0004497);; Molecular Function: iron ion binding (GO:0005506);; Molecular Function: electron transfer activity (GO:0009055);; Molecular Function: oxidoreductase activity, acting on paired donors, with incorporation or reduction of molecular oxygen (GO:0016705);; Molecular Function: heme binding (GO:0020037);; Biological Process: oxidation-reduction pr…	--	[Q]	Secondary metabolites biosynthesis, transport and catabolism	Putative uncharacterized protein {ECO:0000313|EMBL:CAN71441.1} OS=Vitis vinifera (Grape) PE=3 SV=1	PREDICTED: geraniol 8-hydroxylase-like [Vitis vinifera]
Vad17G002810.1	Molecular Function: nucleotide binding (GO:0000166);; Molecular Function: protein kinase activity (GO:0004672);;	--	[T]	Signal transduction mechanisms	Putative uncharacterized protein {ECO:0000313|EMBL:CBI15488.3} OS=Vitis vinifera (Grape) PE=3 SV=1	PREDICTED: probable receptor-like protein kinase At1g67000 isoform X1 [Vitis vinifera]
Vad07G011200.1	--	K06670|0|vvi:100263480|K06670 cohesin complex subunit SCC1 | (RefSeq) sister chromatid cohesion 1 protein 4	[D]	Cell cycle control, cell division, chromosome partitioning	Putative uncharacterized protein {ECO:0000313|EMBL:CCB48300.1} OS=Vitis vinifera (Grape) PE=4 SV=1	PREDICTED: sister chromatid cohesion 1 protein 4 [Vitis vinifera]
Vad04G011470.1	Molecular Function: DNA binding (GO:0003677);; Molecular Function: DNA-binding transcription factor activity (GO:0003700);; Cellular Component: nucleus (GO:0005634);; Biological Process: regulation of transcription, DNA-templated (GO:0006355);; Molecular Function: protein dimerization activity (GO:0046983);;	K09264|1.80833e-166|vvi:100233014|K09264 MADS-box transcription factor, plant | (RefSeq) TM6; flowering-related B-class MADS-box protein	[K]	Transcription	Putative uncharacterized protein {ECO:0000313|EMBL:CCB44396.1} OS=Vitis vinifera (Grape) PE=4 SV=1	flowering-related B-class MADS-box protein [Vitis vinifera]
Vad18G014100.1	--	--	--	--	Putative uncharacterized protein {ECO:0000313|EMBL:CCB45099.1} OS=Vitis vinifera (Grape) PE=4 SV=1	--
Vad13G010430.1	Molecular Function: DNA binding (GO:0003677);; Molecular Function: endonuclease activity (GO:0004519);; Biological Process: DNA metabolic process (GO:0006259);; Biological Process: nucleic acid phosphodiester bond hydrolysis (GO:0090305);;	K08991|0|vvi:100265347|K08991 crossover junction endonuclease MUS81 [EC:3.1.22.-] | (RefSeq) crossover junction endonuclease MUS81	[L]	Replication, recombination and repair	Putative uncharacterized protein {ECO:0000313|EMBL:CBI17741.3} OS=Vitis vinifera (Grape) PE=4 SV=1	PREDICTED: crossover junction endonuclease MUS81 isoform X5 [Vitis vinifera]
Vad14G001150.1	--	--	--	--	Putative uncharacterized protein {ECO:0000313|EMBL:CBI39589.3} OS=Vitis vinifera (Grape) PE=4 SV=1	PREDICTED: uncharacterized protein LOC100266617 [Vitis vinifera]
Vad01G007540.1	Molecular Function: iron ion binding (GO:0005506);; Biological Process: iron-sulfur cluster assembly (GO:0016226);; Molecular Function: iron-sulfur cluster binding (GO:0051536);;	--	[C]	Energy production and conversion	Coffea canephora DH200=94 genomic scaffold, scaffold_1283 {ECO:0000313|EMBL:CDP20494.1} OS=Coffea canephora (Robusta coffee) PE=4 SV=1	unnamed protein product [Vitis vinifera]
Vad09G010500.1	Cellular Component: chloroplast thylakoid membrane (GO:0009535);; Cellular Component: chloroplast envelope (GO:0009941);;	--	--	--	Putative uncharacterized protein {ECO:0000313|EMBL:CAN63741.1} OS=Vitis vinifera (Grape) PE=4 SV=1	hypothetical protein VITISV_041628 [Vitis vinifera]
Vad03G000310.1	Molecular Function: DNA-binding transcription factor activity (GO:0003700);; Cellular Component: nucleus (GO:0005634);; Molecular Function: zinc ion binding (GO:0008270);; Molecular Function: sequence-specific DNA binding (GO:0043565);; Biological Process: positive regulation of transcription, DNA-templated (GO:0045893);;	--	[K]	Transcription	Putative uncharacterized protein {ECO:0000313|EMBL:CCB60711.1} OS=Vitis vinifera (Grape) PE=4 SV=1	PREDICTED: GATA transcription factor 5-like [Vitis vinifera]
Vad11G006370.1	Molecular Function: protein serine/threonine kinase activity (GO:0004674);; Molecular Function: ATP binding (GO:0005524);; Biological Process: protein phosphorylation (GO:0006468);;	--	--	--	Putative uncharacterized protein {ECO:0000313|EMBL:CBI25592.3} OS=Vitis vinifera (Grape) PE=4 SV=1	unnamed protein product [Vitis vinifera]
Vad08G002840.1	Biological Process: dephosphorylation (GO:0016311);; Molecular Function: phosphatase activity (GO:0016791);;	K15731|0|vvi:100248837|K15731 carboxy-terminal domain RNA polymerase II polypeptide A small phosphatase [EC:3.1.3.16] | (RefSeq) CTD small phosphatase-like protein	[K]	Transcription	Putative uncharacterized protein {ECO:0000313|EMBL:CBI22795.3} OS=Vitis vinifera (Grape) PE=4 SV=1	PREDICTED: CTD small phosphatase-like protein [Vitis vinifera]
Vad12G002860.1	Molecular Function: protein serine/threonine kinase activity (GO:0004674);; Molecular Function: ATP binding (GO:0005524);; Cellular Component: nucleus (GO:0005634);; Biological Process: protein phosphorylation (GO:0006468);;	K02178|0|vvi:100260743|K02178 checkpoint serine/threonine-protein kinase [EC:2.7.11.1] | (RefSeq) mitotic checkpoint serine/threonine-protein kinase BUB1	[D]	Cell cycle control, cell division, chromosome partitioning	Putative uncharacterized protein {ECO:0000313|EMBL:CBI21878.3} OS=Vitis vinifera (Grape) PE=4 SV=1	PREDICTED: mitotic checkpoint serine/threonine-protein kinase BUB1 [Vitis vinifera]
Vad17G000190.1	Molecular Function: zinc ion binding (GO:0008270);;	--	[S]	Function unknown	Putative uncharacterized protein {ECO:0000313|EMBL:CAN73072.1} OS=Vitis vinifera (Grape) PE=4 SV=1	PREDICTED: uncharacterized protein LOC104882376 [Vitis vinifera]
Vad07G018370.1	Biological Process: response to auxin (GO:0009733);;	K14488|3.31914e-69|vvi:100259386|K14488 SAUR family protein | (RefSeq) auxin-responsive protein SAUR32-like	--	--	Putative uncharacterized protein {ECO:0000313|EMBL:CAN76261.1} OS=Vitis vinifera (Grape) PE=4 SV=1	PREDICTED: auxin-induced protein 6B-like [Vitis vinifera]
Vad0G020350.1	--	--	--	--	Putative uncharacterized protein {ECO:0000313|EMBL:CAN77808.1} OS=Vitis vinifera (Grape) PE=4 SV=1	PREDICTED: UPF0481 protein At3g47200-like [Vitis vinifera]
Vad07G018330.1	Biological Process: mitotic cell cycle (GO:0000278);; Molecular Function: ATP binding (GO:0005524);; Molecular Function: RNA polymerase II CTD heptapeptide repeat kinase activity (GO:0008353);; Biological Process: stomatal lineage progression (GO:0010440);; Biological Process: DNA endoreduplication (GO:0042023);; Biological Process: negative regulation of cyclin-dependent protein serine/threonine…	K02208|0|vvi:100249168|K02208 cyclin-dependent kinase 8/11 [EC:2.7.11.22 2.7.11.23] | (RefSeq) cyclin-dependent kinase E-1	[K]	Transcription	Putative uncharacterized protein {ECO:0000313|EMBL:CBI21620.3} OS=Vitis vinifera (Grape) PE=4 SV=1	PREDICTED: cyclin-dependent kinase E-1 [Vitis vinifera]
Vad02G003580.1	Cellular Component: transcription factor TFIIE complex (GO:0005673);; Biological Process: transcription initiation from RNA polymerase II promoter (GO:0006367);;	K03137|0|vvi:100259920|K03137 transcription initiation factor TFIIE subunit beta | (RefSeq) general transcription factor IIE subunit 2	[K]	Transcription	Putative uncharacterized protein {ECO:0000313|EMBL:CBI34705.3} OS=Vitis vinifera (Grape) PE=4 SV=1	PREDICTED: general transcription factor IIE subunit 2 [Vitis vinifera]
Vad11G000090.1	Biological Process: dephosphorylation (GO:0016311);; Molecular Function: phosphatase activity (GO:0016791);;	--	--	--	Putative uncharacterized protein {ECO:0000313|EMBL:CCB51357.1} OS=Vitis vinifera (Grape) PE=4 SV=1	unnamed protein product [Vitis vinifera]
Vad10G003470.1	Molecular Function: protein serine/threonine kinase activity (GO:0004674);; Molecular Function: ATP binding (GO:0005524);; Biological Process: protein phosphorylation (GO:0006468);;	K04733|0|vvi:100854625|K04733 interleukin-1 receptor-associated kinase 4 [EC:2.7.11.1] | (RefSeq) putative receptor-like protein kinase At4g00960	--	--	Putative uncharacterized protein {ECO:0000313|EMBL:CCB48386.1} OS=Vitis vinifera (Grape) PE=3 SV=1	PREDICTED: putative receptor-like protein kinase At4g00960 isoform X2 [Vitis vinifera]
Vad08G005910.1	--	--	--	--	Putative uncharacterized protein {ECO:0000313|EMBL:CCB57089.1} OS=Vitis vinifera (Grape) PE=4 SV=1	PREDICTED: uncharacterized protein DDB_G0273453/DDB_G0273565-like isoform X2 [Vitis vinifera]
Vad0G014370.1	--	--	--	--	Putative uncharacterized protein {ECO:0000313|EMBL:CCB58144.1} OS=Vitis vinifera (Grape) PE=4 SV=1	PREDICTED: uncharacterized protein LOC100247521 isoform X3 [Vitis vinifera]
Vad14G009550.1	--	--	--	--	Putative uncharacterized protein {ECO:0000313|EMBL:CAN71476.1} OS=Vitis vinifera (Grape) PE=4 SV=1	hypothetical protein VITISV_038619 [Vitis vinifera]
Vad15G002050.1	--	--	--	--	Putative uncharacterized protein {ECO:0000313|EMBL:CBI38105.3} OS=Vitis vinifera (Grape) PE=4 SV=1	unnamed protein product [Vitis vinifera]
Vad08G011820.1	Molecular Function: zinc ion binding (GO:0008270);;	--	[O]	Posttranslational modification, protein turnover, chaperones	Putative uncharacterized protein {ECO:0000313|EMBL:CAN65773.1} OS=Vitis vinifera (Grape) PE=4 SV=1	PREDICTED: RING-H2 finger protein ATL52-like [Vitis vinifera]
Vad10G009730.1	--	--	[I]	Lipid transport and metabolism	Putative uncharacterized protein {ECO:0000313|EMBL:CCB55825.1} OS=Vitis vinifera (Grape) PE=4 SV=1	PREDICTED: phospholipase A1-Igamma1, chloroplastic-like [Vitis vinifera]
Vad02G006500.1	--	--	[R]	General function prediction only	Putative uncharacterized protein {ECO:0000313|EMBL:CCB48471.1} OS=Vitis vinifera (Grape) PE=4 SV=1	PREDICTED: pentatricopeptide repeat-containing protein At4g16835, mitochondrial, partial [Vitis vinifera]
Vad06G002320.1	Molecular Function: ribose-5-phosphate isomerase activity (GO:0004751);; Biological Process: pentose-phosphate shunt, non-oxidative branch (GO:0009052);;	K01807|0|vvi:100257096|K01807 ribose 5-phosphate isomerase A [EC:5.3.1.6] | (RefSeq) probable ribose-5-phosphate isomerase 2	[G]	Carbohydrate transport and metabolism	Putative uncharacterized protein {ECO:0000313|EMBL:CCB43644.1} OS=Vitis vinifera (Grape) PE=3 SV=1	PREDICTED: probable ribose-5-phosphate isomerase 2 [Vitis vinifera]
Vad07G005950.1	--	--	--	--	Putative uncharacterized protein {ECO:0000313|EMBL:CBI39400.3} OS=Vitis vinifera (Grape) PE=4 SV=1	unnamed protein product [Vitis vinifera]
Vad0G025460.1	Molecular Function: nucleotide binding (GO:0000166);; Molecular Function: nucleoside-triphosphatase activity (GO:0017111);; Biological Process: aromatic compound catabolic process (GO:0019439);; Biological Process: protein metabolic process (GO:0019538);; Biological Process: cellular nitrogen compound catabolic process (GO:0044270);; Biological Process: metabolic process (GO:0044710);; Biological…	K03544|8.43764e-132|pmum:103333648|K03544 ATP-dependent Clp protease ATP-binding subunit ClpX | (RefSeq) CLP protease regulatory subunit CLPX1, mitochondrial	[O]	Posttranslational modification, protein turnover, chaperones	ATP-dependent Clp protease ATP-binding subunit ClpX {ECO:0000313|EMBL:EKU20188.1} OS=Nannochloropsis gaditana CCMP526 PE=3 SV=1	ATP-dependent Clp protease ATP-binding subunit ClpX [Beauveria bassiana D1-5]
Vad03G009810.1	Molecular Function: DNA helicase activity (GO:0003678);; Molecular Function: ATP binding (GO:0005524);; Biological Process: DNA duplex unwinding (GO:0032508);;	--	--	--	Putative uncharacterized protein {ECO:0000313|EMBL:CCB44938.1} OS=Vitis vinifera (Grape) PE=4 SV=1	hypothetical protein VITISV_008491 [Vitis vinifera]
Vad08G001540.1	--	--	[R]	General function prediction only	Putative uncharacterized protein {ECO:0000313|EMBL:CBI39053.3} OS=Vitis vinifera (Grape) PE=4 SV=1	unnamed protein product [Vitis vinifera]
Vad12G007580.1	Molecular Function: hydrolase activity (GO:0016787);;	--	[T]	Signal transduction mechanisms	Putative uncharacterized protein {ECO:0000313|EMBL:CCB51749.1} OS=Vitis vinifera (Grape) PE=3 SV=1	unnamed protein product [Vitis vinifera]
Vad06G006320.1	--	K09598|7.78568e-120|vvi:100245846|K09598 signal peptide peptidase-like 3 [EC:3.4.23.-] | (RefSeq) signal peptide peptidase-like 1	[S]	Function unknown	Putative uncharacterized protein {ECO:0000313|EMBL:CAN83442.1} OS=Vitis vinifera (Grape) PE=4 SV=1	PREDICTED: signal peptide peptidase-like 1 [Vitis vinifera]
Vad14G003390.1	--	--	--	--	Putative uncharacterized protein {ECO:0000313|EMBL:CAN69846.1} OS=Vitis vinifera (Grape) PE=4 SV=1	PREDICTED: F-box/kelch-repeat protein At1g57790-like [Vitis vinifera]
Vad17G004810.1	Molecular Function: nucleic acid binding (GO:0003676);; Cellular Component: mitochondrion (GO:0005739);;	--	--	--	Putative uncharacterized protein {ECO:0000313|EMBL:CCB43141.1} OS=Vitis vinifera (Grape) PE=4 SV=1	PREDICTED: uncharacterized protein LOC100260307 [Vitis vinifera]
Vad14G007230.1	--	--	--	--	Putative uncharacterized protein {ECO:0000313|EMBL:CBI16866.3} OS=Vitis vinifera (Grape) PE=4 SV=1	unnamed protein product [Vitis vinifera]
Vad14G011950.1	Biological Process: tryptophan biosynthetic process (GO:0000162);; Molecular Function: anthranilate phosphoribosyltransferase activity (GO:0004048);;	--	--	--	Putative uncharacterized protein {ECO:0000313|EMBL:CBI34894.3} OS=Vitis vinifera (Grape) PE=4 SV=1	PREDICTED: uncharacterized protein LOC100247330 [Vitis vinifera]
Vad18G013880.1	Molecular Function: copper ion binding (GO:0005507);; Biological Process: lignin catabolic process (GO:0046274);; Cellular Component: apoplast (GO:0048046);; Molecular Function: hydroquinone:oxygen oxidoreductase activity (GO:0052716);; Biological Process: oxidation-reduction process (GO:0055114);;	K05909|0|vvi:100256018|K05909 laccase [EC:1.10.3.2] | (RefSeq) laccase-14	[Q]	Secondary metabolites biosynthesis, transport and catabolism	Laccase {ECO:0000256|RuleBase:RU361119} OS=Vitis vinifera (Grape) PE=3 SV=1	PREDICTED: laccase-14-like [Vitis vinifera]
Vad10G011760.1	Molecular Function: protein serine/threonine kinase activity (GO:0004674);; Molecular Function: ATP binding (GO:0005524);; Biological Process: protein phosphorylation (GO:0006468);;	--	--	--	Putative uncharacterized protein {ECO:0000313|EMBL:CCB61507.1} OS=Vitis vinifera (Grape) PE=3 SV=1	PREDICTED: probable LRR receptor-like serine/threonine-protein kinase At1g56140 isoform X1 [Vitis vinifera]
Vad03G000200.1	Cellular Component: chloroplast stroma (GO:0009570);; Cellular Component: chloroplast envelope (GO:0009941);; Biological Process: carotenoid biosynthetic process (GO:0016117);; Biological Process: isopentenyl diphosphate biosynthetic process, methylerythritol 4-phosphate pathway (GO:0019288);;	--	--	--	Putative uncharacterized protein {ECO:0000313|EMBL:CBI38016.3} OS=Vitis vinifera (Grape) PE=4 SV=1	PREDICTED: uncharacterized protein LOC100247047 isoform X1 [Vitis vinifera]
Vad06G011240.1	--	--	--	--	Putative uncharacterized protein {ECO:0000313|EMBL:CBI17083.3} OS=Vitis vinifera (Grape) PE=4 SV=1	PREDICTED: putative phytosulfokines 6 isoform X1 [Vitis vinifera]
Vad11G008600.1	--	--	--	--	Putative uncharacterized protein {ECO:0000313|EMBL:CBI40108.3} OS=Vitis vinifera (Grape) PE=4 SV=1	PREDICTED: uncharacterized protein LOC100267538 [Vitis vinifera]
Vad13G013530.1	Biological Process: defense response (GO:0006952);; Molecular Function: ADP binding (GO:0043531);;	--	[T]	Signal transduction mechanisms	Putative uncharacterized protein {ECO:0000313|EMBL:CCB58632.1} OS=Vitis vinifera (Grape) PE=4 SV=1	hypothetical protein VITISV_014782 [Vitis vinifera]
Vad0G014850.1	Biological Process: one-carbon metabolic process (GO:0006730);; Biological Process: serine family amino acid metabolic process (GO:0009069);; Molecular Function: transferase activity, transferring one-carbon groups (GO:0016741);;	K00600|7.05115e-55|cme:CYME_CMI091C|K00600 glycine hydroxymethyltransferase [EC:2.1.2.1] | (RefSeq) serine hydroxymethyltransferase	[E]	Amino acid transport and metabolism	Uncharacterized protein {ECO:0000313|EMBL:EKX34161.1} OS=Guillardia theta CCMP2712 PE=3 SV=1	hypothetical protein GUITHDRAFT_119655 [Guillardia theta CCMP2712]
Vad18G009610.1	Biological Process: response to wounding (GO:0009611);; Biological Process: response to mechanical stimulus (GO:0009612);; Biological Process: response to chitin (GO:0010200);;	--	--	--	Putative uncharacterized protein {ECO:0000313|EMBL:CBI19682.3} OS=Vitis vinifera (Grape) PE=4 SV=1	PREDICTED: uncharacterized protein LOC100264357 [Vitis vinifera]
Vad09G009630.1	Cellular Component: nucleus (GO:0005634);; Cellular Component: endosome (GO:0005768);; Cellular Component: Golgi apparatus (GO:0005794);; Cellular Component: trans-Golgi network (GO:0005802);; Cellular Component: cytosol (GO:0005829);; Cellular Component: plasma membrane (GO:0005886);;	--	[S]	Function unknown	Protein YIPF {ECO:0000256|RuleBase:RU361264} OS=Vitis vinifera (Grape) PE=3 SV=1	PREDICTED: protein YIPF6 homolog [Vitis vinifera]
Vad0G011050.1	--	--	--	--	Uncharacterized protein {ECO:0000313|EMBL:CCO66523.1} OS=Bathycoccus prasinos PE=4 SV=1	conserved hypothetical protein [Bathycoccus prasinos]
Vad18G001030.1	Molecular Function: nucleic acid binding (GO:0003676);; Cellular Component: nucleolus (GO:0005730);; Cellular Component: nuclear body (GO:0016604);; Cellular Component: ribonucleoprotein complex (GO:0030529);;	K11088|1.76296e-91|vvi:100254787|K11088 small nuclear ribonucleoprotein D3 | (RefSeq) small nuclear ribonucleoprotein SmD3b	[A]	RNA processing and modification	Putative uncharacterized protein {ECO:0000313|EMBL:CBI40711.3} OS=Vitis vinifera (Grape) PE=4 SV=1	PREDICTED: small nuclear ribonucleoprotein Sm D3 [Vitis vinifera]
Vad0G010000.1	--	K03695|8.34564e-43|gsl:Gasu_55830|K03695 ATP-dependent Clp protease ATP-binding subunit ClpB | (RefSeq) ATP-dependent Clp protease ATP-binding subunit ClpB	[O]	Posttranslational modification, protein turnover, chaperones	Uncharacterized protein {ECO:0000313|EnsemblPlants:TRIUR3_31622-P1} OS=Triticum urartu (Red wild einkorn) PE=3 SV=1	Chaperone protein ClpB [Beauveria bassiana D1-5]
Vad16G008000.1	--	--	--	--	Putative uncharacterized protein {ECO:0000313|EMBL:CBI22581.3} OS=Vitis vinifera (Grape) PE=4 SV=1	unnamed protein product [Vitis vinifera]
Vad11G008580.1	--	K20464|0|vvi:100255720|K20464 oxysterol-binding protein-related protein 5/8 | (RefSeq) oxysterol-binding protein-related protein 4B	[T]	Signal transduction mechanisms	Putative uncharacterized protein {ECO:0000313|EMBL:CBI40109.3} OS=Vitis vinifera (Grape) PE=3 SV=1	PREDICTED: oxysterol-binding protein-related protein 4C-like [Vitis vinifera]
Vad07G001140.1	--	--	--	--	Putative uncharacterized protein {ECO:0000313|EMBL:CCB51902.1} OS=Vitis vinifera (Grape) PE=4 SV=1	PREDICTED: vicilin-like antimicrobial peptides 2-3 [Vitis vinifera]
Vad10G000790.1	--	--	--	--	Putative uncharacterized protein {ECO:0000313|EMBL:CCB48193.1} OS=Vitis vinifera (Grape) PE=4 SV=1	PREDICTED: probable F-box protein At4g22030 [Vitis vinifera]
Vad14G013380.1	--	--	[O]	Posttranslational modification, protein turnover, chaperones	Putative uncharacterized protein {ECO:0000313|EMBL:CCB58593.1} OS=Vitis vinifera (Grape) PE=4 SV=1	PREDICTED: uncharacterized protein LOC104881688 [Vitis vinifera]
Vad18G000070.1	Molecular Function: zinc ion binding (GO:0008270);; Cellular Component: integral component of membrane (GO:0016021);; Molecular Function: cellulose synthase (UDP-forming) activity (GO:0016760);; Biological Process: cellulose biosynthetic process (GO:0030244);;	K10999|0|vvi:100242715|K10999 cellulose synthase A [EC:2.4.1.12] | (RefSeq) probable cellulose synthase A catalytic subunit 5 [UDP-forming]	--	--	Cellulose synthase {ECO:0000256|RuleBase:RU361116} OS=Vitis vinifera (Grape) PE=3 SV=1	PREDICTED: probable cellulose synthase A catalytic subunit 5 [UDP-forming] [Vitis vinifera]
Vad15G004770.1	--	--	--	--	Putative uncharacterized protein {ECO:0000313|EMBL:CBI38868.3} OS=Vitis vinifera (Grape) PE=4 SV=1	unnamed protein product [Vitis vinifera]
Vad03G010280.1	--	--	--	--	Putative uncharacterized protein {ECO:0000313|EMBL:CBI23788.3} OS=Vitis vinifera (Grape) PE=4 SV=1	unnamed protein product [Vitis vinifera]
Vad06G010950.1	Molecular Function: aspartic-type endopeptidase activity (GO:0004190);; Biological Process: proteolysis (GO:0006508);;	--	[O]	Posttranslational modification, protein turnover, chaperones	Putative uncharacterized protein {ECO:0000313|EMBL:CBI17107.3} OS=Vitis vinifera (Grape) PE=4 SV=1	PREDICTED: aspartic proteinase-like protein 2 [Vitis vinifera]
Vad15G008160.1	Biological Process: polysaccharide catabolic process (GO:0000272);; Molecular Function: chitinase activity (GO:0004568);; Cellular Component: extracellular region (GO:0005576);; Cellular Component: cell wall (GO:0005618);; Biological Process: chitin catabolic process (GO:0006032);;	K01183|0|vvi:100251711|K01183 chitinase [EC:3.2.1.14] | (RefSeq) acidic endochitinase	[M]	Cell wall/membrane/envelope biogenesis	Putative uncharacterized protein {ECO:0000313|EMBL:CBI40460.3} OS=Vitis vinifera (Grape) PE=3 SV=1	PREDICTED: acidic endochitinase [Vitis vinifera]
Vad18G022000.1	Cellular Component: vacuole (GO:0005773);;	--	--	--	Putative uncharacterized protein {ECO:0000313|EMBL:CCB52338.1} OS=Vitis vinifera (Grape) PE=4 SV=1	PREDICTED: uncharacterized protein LOC100257934 isoform X1 [Vitis vinifera]
Vad04G010400.1	Molecular Function: G protein-coupled receptor kinase activity (GO:0004703);; Molecular Function: ATP binding (GO:0005524);; Biological Process: protein phosphorylation (GO:0006468);;	K04733|0|vvi:100265084|K04733 interleukin-1 receptor-associated kinase 4 [EC:2.7.11.1] | (RefSeq) proline-rich receptor-like protein kinase PERK4	[T]	Signal transduction mechanisms	Putative uncharacterized protein {ECO:0000313|EMBL:CCB44461.1} OS=Vitis vinifera (Grape) PE=3 SV=1	PREDICTED: proline-rich receptor-like protein kinase PERK4 isoform X1 [Vitis vinifera]
Vad12G011690.1	Molecular Function: calmodulin binding (GO:0005516);; Cellular Component: plasma membrane (GO:0005886);; Biological Process: defense response (GO:0006952);; Biological Process: cell death (GO:0008219);; Biological Process: response to biotic stimulus (GO:0009607);; Cellular Component: integral component of membrane (GO:0016021);;	K08472|0|vvi:100233057|K08472 mlo protein | (RefSeq) MLO4; MLO-like protein 13	--	--	MLO-like protein {ECO:0000256|RuleBase:RU280816} OS=Vitis vinifera (Grape) PE=3 SV=1	PREDICTED: endoglucanase 25 [Vitis vinifera]
Vad07G001310.1	--	--	[S]	Function unknown	Uncharacterized protein {ECO:0000313|EMBL:KDP21446.1} OS=Jatropha curcas (Barbados nut) PE=4 SV=1	PREDICTED: NF-kappa-B-activating protein [Vitis vinifera]
Vad07G006850.1	Molecular Function: phosphatidylcholine-sterol O-acyltransferase activity (GO:0004607);; Biological Process: leaf senescence (GO:0010150);; Biological Process: sterol catabolic process (GO:0016127);; Biological Process: sterol esterification (GO:0034434);; Cellular Component: intracellular membrane-bounded organelle (GO:0043231);; Molecular Function: phosphatidylethanolamine-sterol O-acyltransfer…	--	[I]	Lipid transport and metabolism	Putative uncharacterized protein {ECO:0000313|EMBL:CBI37158.3} OS=Vitis vinifera (Grape) PE=4 SV=1	PREDICTED: phospholipid--sterol O-acyltransferase isoform X2 [Vitis vinifera]
Vad01G002130.1	Molecular Function: metal ion binding (GO:0046872);;	--	[R]	General function prediction only	Putative uncharacterized protein {ECO:0000313|EMBL:CCB50977.1} OS=Vitis vinifera (Grape) PE=4 SV=1	PREDICTED: zinc finger A20 and AN1 domain-containing stress-associated protein 1-like [Vitis vinifera]
Vad08G000150.1	Molecular Function: protein serine/threonine kinase activity (GO:0004674);; Molecular Function: non-membrane spanning protein tyrosine kinase activity (GO:0004715);; Molecular Function: ATP binding (GO:0005524);; Biological Process: protein phosphorylation (GO:0006468);;	--	--	--	Putative uncharacterized protein {ECO:0000313|EMBL:CCB55933.1} OS=Vitis vinifera (Grape) PE=4 SV=1	PREDICTED: uncharacterized protein LOC100246776 [Vitis vinifera]
Vad17G007230.1	Molecular Function: nucleoside diphosphate kinase activity (GO:0004550);; Molecular Function: ATP binding (GO:0005524);; Cellular Component: nucleus (GO:0005634);; Biological Process: nucleoside diphosphate phosphorylation (GO:0006165);; Biological Process: GTP biosynthetic process (GO:0006183);; Biological Process: UTP biosynthetic process (GO:0006228);; Biological Process: CTP biosynthetic proc…	K00940|2.76791e-168|vvi:100242823|K00940 nucleoside-diphosphate kinase [EC:2.7.4.6] | (RefSeq) nucleoside diphosphate kinase 2, chloroplastic	[F]	Nucleotide transport and metabolism	Nucleoside diphosphate kinase {ECO:0000256|RuleBase:RU004013} OS=Vitis vinifera (Grape) PE=3 SV=1	PREDICTED: nucleoside diphosphate kinase 2, chloroplastic [Vitis vinifera]
Vad16G004150.1	Molecular Function: copper ion binding (GO:0005507);; Molecular Function: L-ascorbate oxidase activity (GO:0008447);; Cellular Component: plant-type cell wall (GO:0009505);; Biological Process: cell tip growth (GO:0009932);; Cellular Component: anchored component of plasma membrane (GO:0046658);; Cellular Component: apoplast (GO:0048046);; Biological Process: oxidation-reduction process (GO:00551…	K19791|0|vvi:100253642|K19791 iron transport multicopper oxidase | (RefSeq) monocopper oxidase-like protein SKU5	[Q]	Secondary metabolites biosynthesis, transport and catabolism	Putative uncharacterized protein {ECO:0000313|EMBL:CBI24584.3} OS=Vitis vinifera (Grape) PE=4 SV=1	PREDICTED: monocopper oxidase-like protein SKU5 [Vitis vinifera]
Vad08G001220.1	--	--	--	--	Putative uncharacterized protein {ECO:0000313|EMBL:CCB56017.1} OS=Vitis vinifera (Grape) PE=4 SV=1	PREDICTED: uncharacterized protein LOC100253604 [Vitis vinifera]
Vad02G000910.1	Cellular Component: endosome (GO:0005768);; Cellular Component: Golgi apparatus (GO:0005794);; Cellular Component: trans-Golgi network (GO:0005802);; Biological Process: protein glycosylation (GO:0006486);; Cellular Component: integral component of membrane (GO:0016021);; Biological Process: cellulose biosynthetic process (GO:0030244);; Molecular Function: galactosylxylosylprotein 3-beta-galactos…	K20854|0|vvi:100251974|K20854 hydroxyproline O-galactosyltransferase HPGT [EC:2.4.1.-] | (RefSeq) hydroxyproline O-galactosyltransferase HPGT1	[G]	Carbohydrate transport and metabolism	Putative uncharacterized protein {ECO:0000313|EMBL:CBI34443.3} OS=Vitis vinifera (Grape) PE=4 SV=1	PREDICTED: probable beta-1,3-galactosyltransferase 11 [Vitis vinifera]
Vad05G012080.1	Cellular Component: mitochondrion (GO:0005739);;	--	--	--	Putative uncharacterized protein {ECO:0000313|EMBL:CAN67579.1} OS=Vitis vinifera (Grape) PE=4 SV=1	hypothetical protein VITISV_022628 [Vitis vinifera]
Vad16G001120.1	--	--	[R]	General function prediction only	Putative uncharacterized protein {ECO:0000313|EMBL:CCB49344.1} OS=Vitis vinifera (Grape) PE=4 SV=1	PREDICTED: receptor-like protein 12 [Vitis vinifera]
Vad10G012540.1	Molecular Function: GTPase activity (GO:0003924);; Molecular Function: GTP binding (GO:0005525);; Biological Process: obsolete GTP catabolic process (GO:0006184);;	K03242|0|vvi:100252857|K03242 translation initiation factor 2 subunit 3 | (RefSeq) eukaryotic translation initiation factor 2 subunit 3-like	[J]	Translation, ribosomal structure and biogenesis	Putative uncharacterized protein {ECO:0000313|EMBL:CAN80178.1} OS=Vitis vinifera (Grape) PE=4 SV=1	PREDICTED: eukaryotic translation initiation factor 2 subunit gamma [Vitis vinifera]
Vad11G011260.1	Biological Process: carbohydrate metabolic process (GO:0005975);; Molecular Function: isoamylase activity (GO:0019156);; Molecular Function: cation binding (GO:0043169);;	K01214|0|vvi:100261768|K01214 isoamylase [EC:3.2.1.68] | (RefSeq) isoamylase 1, chloroplastic	[G]	Carbohydrate transport and metabolism	Putative uncharacterized protein {ECO:0000313|EMBL:CCB62617.1} OS=Vitis vinifera (Grape) PE=4 SV=1	unnamed protein product [Vitis vinifera]
Vad08G006080.1	--	--	--	--	Putative uncharacterized protein {ECO:0000313|EMBL:CBI32740.3} OS=Vitis vinifera (Grape) PE=4 SV=1	PREDICTED: cytokinin riboside 5&apos;-monophosphate phosphoribohydrolase LOG3 [Vitis vinifera]
Vad12G002200.1	--	K19038|9.73185e-180|vvi:100248798|K19038 E3 ubiquitin-protein ligase ATL41 [EC:2.3.2.27] | (RefSeq) RING-H2 finger protein ATL40	[O]	Posttranslational modification, protein turnover, chaperones	Putative uncharacterized protein {ECO:0000313|EMBL:CCB47347.1} OS=Vitis vinifera (Grape) PE=4 SV=1	PREDICTED: RING-H2 finger protein ATL40-like [Vitis vinifera]
Vad09G011180.1	--	--	--	--	Putative uncharacterized protein {ECO:0000313|EMBL:CBI18365.3} OS=Vitis vinifera (Grape) PE=4 SV=1	PREDICTED: uncharacterized protein LOC100241082 isoform X1 [Vitis vinifera]
Vad08G007140.1	--	--	--	--	Putative uncharacterized protein {ECO:0000313|EMBL:CCB57011.1} OS=Vitis vinifera (Grape) PE=4 SV=1	PREDICTED: uncharacterized protein LOC100854102 [Vitis vinifera]
Vad17G004570.1	Molecular Function: ATP:ADP antiporter activity (GO:0005471);; Cellular Component: mitochondrial inner membrane (GO:0005743);; Cellular Component: endoplasmic reticulum membrane (GO:0005789);; Cellular Component: integral component of membrane (GO:0016021);; Biological Process: seed development (GO:0048316);; Biological Process: root development (GO:0048364);; Biological Process: adenine nucleoti…	K05863|0|vvi:100263960|K05863 solute carrier family 25 (mitochondrial adenine nucleotide translocator), member 4/5/6/31 | (RefSeq) ADP,ATP carrier protein ER-ANT1	[C]	Energy production and conversion	Putative uncharacterized protein {ECO:0000313|EMBL:CBI15341.3} OS=Vitis vinifera (Grape) PE=3 SV=1	PREDICTED: ADP,ATP carrier protein ER-ANT1 isoform X1 [Vitis vinifera]
Vad15G004680.1	Biological Process: DNA-dependent DNA replication (GO:0006261);;	--	[S]	Function unknown	Putative uncharacterized protein {ECO:0000313|EMBL:CBI38876.3} OS=Vitis vinifera (Grape) PE=4 SV=1	PREDICTED: spindle and kinetochore-associated protein 1 homolog [Vitis vinifera]
Vad05G010880.1	Molecular Function: serine-type endopeptidase activity (GO:0004252);; Cellular Component: integral component of membrane (GO:0016021);;	--	[S]	Function unknown	Putative uncharacterized protein {ECO:0000313|EMBL:CAN67998.1} OS=Vitis vinifera (Grape) PE=4 SV=1	PREDICTED: rhomboid protein 2 [Vitis vinifera]
Vad0G028340.1	--	--	--	--	--	hypothetical protein SMAC_11287 [Sordaria macrospora k-hell]
Vad16G001090.1	--	--	[R]	General function prediction only	Putative uncharacterized protein {ECO:0000313|EMBL:CBI26551.3} OS=Vitis vinifera (Grape) PE=4 SV=1	unnamed protein product [Vitis vinifera]
Vad03G011380.1	Cellular Component: mitochondrion (GO:0005739);; Cellular Component: plasma membrane (GO:0005886);; Biological Process: glutamate decarboxylation to succinate (GO:0006540);; Biological Process: response to oxidative stress (GO:0006979);; Molecular Function: zinc ion binding (GO:0008270);; Biological Process: gamma-aminobutyric acid catabolic process (GO:0009450);; Biological Process: pollen tube …	K16871|0|vvi:100248495|K16871 4-aminobutyrate---pyruvate transaminase [EC:2.6.1.96] | (RefSeq) gamma aminobutyrate transaminase 1, mitochondrial	[E]	Amino acid transport and metabolism	Putative uncharacterized protein {ECO:0000313|EMBL:CCB58036.1} OS=Vitis vinifera (Grape) PE=3 SV=1	PREDICTED: gamma aminobutyrate transaminase 1, mitochondrial-like [Vitis vinifera]
Vad06G003280.1	Molecular Function: zinc ion binding (GO:0008270);; Molecular Function: oxidoreductase activity (GO:0016491);; Biological Process: oxidation-reduction process (GO:0055114);;	K00121|0|vvi:100250105|K00121 S-(hydroxymethyl)glutathione dehydrogenase / alcohol dehydrogenase [EC:1.1.1.284 1.1.1.1] | (RefSeq) alcohol dehydrogenase class-3	[Q]	Secondary metabolites biosynthesis, transport and catabolism	Putative uncharacterized protein {ECO:0000313|EMBL:CCB43593.1} OS=Vitis vinifera (Grape) PE=4 SV=1	unnamed protein product [Vitis vinifera]
Vad04G004760.1	--	--	[R]	General function prediction only	Putative uncharacterized protein {ECO:0000313|EMBL:CCB46791.1} OS=Vitis vinifera (Grape) PE=4 SV=1	PREDICTED: pentatricopeptide repeat-containing protein At4g21065-like [Vitis vinifera]
Vad18G002780.1	Biological Process: lipid metabolic process (GO:0006629);; Molecular Function: hydrolase activity, acting on ester bonds (GO:0016788);;	--	--	--	Putative uncharacterized protein {ECO:0000313|EMBL:CBI19019.3} OS=Vitis vinifera (Grape) PE=4 SV=1	PREDICTED: esterase-like [Vitis vinifera]
Vad09G004120.1	Molecular Function: structural molecule activity (GO:0005198);; Biological Process: intracellular protein transport (GO:0006886);; Biological Process: vesicle-mediated transport (GO:0016192);; Molecular Function: myosin heavy chain kinase activity (GO:0016905);; Cellular Component: membrane coat (GO:0030117);;	K17302|0|vvi:100261812|K17302 coatomer subunit beta' | (RefSeq) coatomer subunit beta'-1	[U]	Intracellular trafficking, secretion, and vesicular transport	Putative uncharacterized protein {ECO:0000313|EMBL:CCB59493.1} OS=Vitis vinifera (Grape) PE=4 SV=1	unnamed protein product [Vitis vinifera]
Vad11G008230.1	Cellular Component: integral component of membrane (GO:0016021);;	--	--	--	Putative uncharacterized protein {ECO:0000313|EMBL:CCB59803.1} OS=Vitis vinifera (Grape) PE=4 SV=1	PREDICTED: tetraspanin-8 [Vitis vinifera]
Vad02G000040.1	Molecular Function: ubiquitin-protein transferase activity (GO:0004842);; Biological Process: protein ubiquitination (GO:0016567);;	K10576|5.63031e-132|vvi:100253472|K10576 ubiquitin-conjugating enzyme E2 H [EC:2.3.2.23] | (RefSeq) ubiquitin-conjugating enzyme E2 4	[O]	Posttranslational modification, protein turnover, chaperones	Putative uncharacterized protein {ECO:0000313|EMBL:CAN60588.1} OS=Vitis vinifera (Grape) PE=3 SV=1	PREDICTED: ubiquitin-conjugating enzyme E2 4 isoform X1 [Vitis vinifera]
Vad11G006270.1	--	--	[O]	Posttranslational modification, protein turnover, chaperones	Putative uncharacterized protein {ECO:0000313|EMBL:CCB49929.1} OS=Vitis vinifera (Grape) PE=4 SV=1	unnamed protein product [Vitis vinifera]
Vad14G013300.1	--	K08900|0|vvi:100266235|K08900 mitochondrial chaperone BCS1 | (RefSeq) AAA-ATPase ASD, mitochondrial-like	[O]	Posttranslational modification, protein turnover, chaperones	Putative uncharacterized protein {ECO:0000313|EMBL:CCB58588.1} OS=Vitis vinifera (Grape) PE=3 SV=1	PREDICTED: ATP-dependent zinc metalloprotease FtsH-like [Vitis vinifera]
Vad08G010310.1	Molecular Function: oxidoreductase activity, acting on CH-OH group of donors (GO:0016614);; Molecular Function: flavin adenine dinucleotide binding (GO:0050660);; Molecular Function: iron-sulfur cluster binding (GO:0051536);; Biological Process: oxidation-reduction process (GO:0055114);;	--	--	--	Putative uncharacterized protein {ECO:0000313|EMBL:CBI30326.3} OS=Vitis vinifera (Grape) PE=4 SV=1	unnamed protein product [Vitis vinifera]
Vad09G002300.1	Molecular Function: DNA binding (GO:0003677);; Molecular Function: DNA-binding transcription factor activity (GO:0003700);; Biological Process: regulation of transcription, DNA-templated (GO:0006355);; Molecular Function: protein dimerization activity (GO:0046983);;	--	--	--	Putative uncharacterized protein {ECO:0000313|EMBL:CCB59369.1} OS=Vitis vinifera (Grape) PE=4 SV=1	PREDICTED: transcription factor bHLH87 [Vitis vinifera]
Vad16G000400.1	--	--	--	--	Putative uncharacterized protein {ECO:0000313|EMBL:CBI26472.3} OS=Vitis vinifera (Grape) PE=4 SV=1	PREDICTED: uncharacterized protein At1g28695 [Vitis vinifera]
Vad0G003310.1	--	--	[E]	Amino acid transport and metabolism	Amino acid transporter {ECO:0000256|RuleBase:RU361216} (Fragment) OS=uncultured Phaeodactylum sp PE=3 SV=1	Proton glutamate symport protein [Beauveria bassiana D1-5]
Vad07G017560.1	Molecular Function: DNA binding (GO:0003677);; Molecular Function: zinc ion binding (GO:0008270);;	--	[R]	General function prediction only	Putative uncharacterized protein {ECO:0000313|EMBL:CAN73104.1} OS=Vitis vinifera (Grape) PE=4 SV=1	PREDICTED: zinc finger A20 and AN1 domain-containing stress-associated protein 9 [Vitis vinifera]
Vad07G010570.1	Biological Process: metabolic process (GO:0008152);; Molecular Function: transferase activity, transferring hexosyl groups (GO:0016758);;	K13691|0|vvi:100265486|K13691 pathogen-inducible salicylic acid glucosyltransferase [EC:2.4.1.-] | (RefSeq) UDP-glycosyltransferase 74G1	[GC]	--	Putative uncharacterized protein {ECO:0000313|EMBL:CCB57290.1} OS=Vitis vinifera (Grape) PE=3 SV=1	PREDICTED: UDP-glycosyltransferase 74E2 [Vitis vinifera]
Vad17G001840.1	--	--	[R]	General function prediction only	Putative uncharacterized protein {ECO:0000313|EMBL:CCB43291.1} OS=Vitis vinifera (Grape) PE=4 SV=1	PREDICTED: uncharacterized protein LOC100250985 [Vitis vinifera]
Vad02G001960.1	--	--	--	--	Putative uncharacterized protein {ECO:0000313|EMBL:CAN65859.1} OS=Vitis vinifera (Grape) PE=4 SV=1	hypothetical protein VITISV_014848 [Vitis vinifera]
Vad06G001370.1	Molecular Function: triglyceride lipase activity (GO:0004806);; Biological Process: lipid metabolic process (GO:0006629);; Molecular Function: phospholipase A1 activity (GO:0008970);; Molecular Function: galactolipase activity (GO:0047714);;	--	[I]	Lipid transport and metabolism	Putative uncharacterized protein {ECO:0000313|EMBL:CCB43698.1} OS=Vitis vinifera (Grape) PE=4 SV=1	PREDICTED: phospholipase A1-Igamma3, chloroplastic [Vitis vinifera]
Vad0G027320.1	Biological Process: polysaccharide metabolic process (GO:0005976);; Biological Process: cellular process (GO:0009987);; Molecular Function: hydrolase activity (GO:0016787);;	K01214|2.54556e-56|jcu:105630655|K01214 isoamylase [EC:3.2.1.68] | (RefSeq) isoamylase 3, chloroplastic	[G]	Carbohydrate transport and metabolism	Isoamylase isoform 3 {ECO:0000313|EMBL:ADD10143.1} (Fragment) OS=Manihot esculenta (Cassava) PE=2 SV=1	PREDICTED: glycogen operon protein GlgX homolog [Cucumis sativus]
Vad11G009520.1	Molecular Function: serine-type carboxypeptidase activity (GO:0004185);; Biological Process: proteolysis (GO:0006508);;	K16296|0|vvi:100253044|K16296 serine carboxypeptidase-like clade I [EC:3.4.16.-] | (RefSeq) serine carboxypeptidase-like 17	[OE]	--	Putative uncharacterized protein {ECO:0000313|EMBL:CBI17849.3} OS=Vitis vinifera (Grape) PE=4 SV=1	PREDICTED: serine carboxypeptidase-like 17 [Vitis vinifera]
Vad01G014520.1	Biological Process: chlorophyll biosynthetic process (GO:0015995);;	--	--	--	Putative uncharacterized protein {ECO:0000313|EMBL:CBI35665.3} OS=Vitis vinifera (Grape) PE=4 SV=1	PREDICTED: uncharacterized protein LOC100260840 isoform X1 [Vitis vinifera]
Vad09G004540.1	Molecular Function: transcription factor binding (GO:0008134);; Biological Process: gibberellin biosynthetic process (GO:0009686);; Biological Process: response to gibberellin (GO:0009739);; Biological Process: seed germination (GO:0009845);; Biological Process: response to red light (GO:0010114);; Molecular Function: gibberellin 3-beta-dioxygenase activity (GO:0016707);; Biological Process: oxid…	K04124|0|vvi:100249739|K04124 gibberellin 3-beta-dioxygenase [EC:1.14.11.15] | (RefSeq) GA3ox2, GA3ox3; gibberellin 3-beta-dioxygenase 1	[QR]	--	Putative uncharacterized protein {ECO:0000313|EMBL:CBI36204.3} OS=Vitis vinifera (Grape) PE=3 SV=1	PREDICTED: gibberellin 3-beta-dioxygenase 1 [Vitis vinifera]
Vad15G001420.1	--	--	--	--	Putative uncharacterized protein {ECO:0000313|EMBL:CBI38045.3} OS=Vitis vinifera (Grape) PE=4 SV=1	unnamed protein product [Vitis vinifera]
Vad18G017300.1	Molecular Function: magnesium ion binding (GO:0000287);; Biological Process: metabolic process (GO:0008152);; Molecular Function: terpene synthase activity (GO:0010333);;	--	--	--	Putative uncharacterized protein {ECO:0000313|EMBL:CBI31301.3} OS=Vitis vinifera (Grape) PE=4 SV=1	PREDICTED: valencene synthase [Vitis vinifera]
Vad18G008710.1	Biological Process: microtubule cytoskeleton organization (GO:0000226);; Cellular Component: spindle pole (GO:0000922);; Cellular Component: microtubule organizing center (GO:0005815);;	--	--	--	Putative uncharacterized protein {ECO:0000313|EMBL:CAN78397.1} OS=Vitis vinifera (Grape) PE=4 SV=1	PREDICTED: CST complex subunit CTC1 isoform X1 [Vitis vinifera]
Vad10G005820.1	Cellular Component: outer membrane (GO:0019867);;	K07277|6.76952e-47|vvi:100258670|K07277 outer membrane protein insertion porin family | (RefSeq) sorting and assembly machinery component 50 homolog B	[R]	General function prediction only	Putative uncharacterized protein {ECO:0000313|EMBL:CCB48821.1} OS=Vitis vinifera (Grape) PE=4 SV=1	PREDICTED: sorting and assembly machinery component 50 homolog B [Vitis vinifera]
Vad02G006510.1	--	--	[R]	General function prediction only	Putative uncharacterized protein {ECO:0000313|EMBL:CCB48471.1} OS=Vitis vinifera (Grape) PE=4 SV=1	PREDICTED: pentatricopeptide repeat-containing protein At4g16835, mitochondrial, partial [Vitis vinifera]
Vad18G013410.1	Molecular Function: RNA binding (GO:0003723);; Molecular Function: RNA-directed DNA polymerase activity (GO:0003964);; Molecular Function: RNA-DNA hybrid ribonuclease activity (GO:0004523);; Biological Process: RNA-dependent DNA biosynthetic process (GO:0006278);; Biological Process: DNA integration (GO:0015074);;	--	--	--	Putative uncharacterized protein {ECO:0000313|EMBL:CCB59330.1} OS=Vitis vinifera (Grape) PE=4 SV=1	hypothetical protein VITISV_042600 [Vitis vinifera]
Vad07G007350.1	--	--	[R]	General function prediction only	Putative uncharacterized protein {ECO:0000313|EMBL:CCB60188.1} OS=Vitis vinifera (Grape) PE=4 SV=1	PREDICTED: pentatricopeptide repeat-containing protein At1g32415, mitochondrial [Vitis vinifera]
Vad08G003220.1	Molecular Function: magnesium ion binding (GO:0000287);; Molecular Function: phospholipid-translocating ATPase activity (GO:0004012);; Molecular Function: ATP binding (GO:0005524);; Biological Process: phospholipid transport (GO:0015914);; Cellular Component: integral component of membrane (GO:0016021);;	K06640|1.50295e-24|vvi:100245131|K06640 serine/threonine-protein kinase ATR [EC:2.7.11.1] | (RefSeq) serine/threonine-protein kinase ATR	[TBLD]	--	Putative uncharacterized protein {ECO:0000313|EMBL:CCB45367.1} OS=Vitis vinifera (Grape) PE=4 SV=1	hypothetical protein VITISV_008007 [Vitis vinifera]
Vad02G009650.1	Biological Process: chlorophyll catabolic process (GO:0015996);;	--	--	--	Putative uncharacterized protein {ECO:0000313|EMBL:CBI37469.3} OS=Vitis vinifera (Grape) PE=4 SV=1	PREDICTED: myosin-14 [Vitis vinifera]
Vad12G005040.1	Biological Process: protein transport (GO:0015031);; Cellular Component: integral component of membrane (GO:0016021);;	--	[R]	General function prediction only	Putative uncharacterized protein {ECO:0000313|EMBL:CAN75708.1} OS=Vitis vinifera (Grape) PE=4 SV=1	PREDICTED: pentatricopeptide repeat-containing protein At1g73710 [Vitis vinifera]
Vad16G005900.1	Biological Process: regulation of cellular process (GO:0050794);;	K14491|0|vvi:104882161|K14491 two-component response regulator ARR-B family | (RefSeq) two-component response regulator ARR14-like	[K]	Transcription	Putative uncharacterized protein {ECO:0000313|EMBL:CAN78184.1} OS=Vitis vinifera (Grape) PE=4 SV=1	PREDICTED: two-component response regulator ARR14-like [Vitis vinifera]
Vad09G007580.1	--	K10891|7.65349e-25|vvi:100248975|K10891 fanconi anemia group D2 protein | (RefSeq) Fanconi anemia group D2 protein homolog	[S]	Function unknown	Putative uncharacterized protein {ECO:0000313|EMBL:CBI33398.3} OS=Vitis vinifera (Grape) PE=4 SV=1	unnamed protein product [Vitis vinifera]
Vad15G001290.1	--	--	--	--	Putative uncharacterized protein {ECO:0000313|EMBL:CBI38214.3} OS=Vitis vinifera (Grape) PE=4 SV=1	unnamed protein product [Vitis vinifera]
Vad12G011870.1	--	--	--	--	Putative uncharacterized protein {ECO:0000313|EMBL:CCB54991.1} OS=Vitis vinifera (Grape) PE=4 SV=1	PREDICTED: 14 kDa proline-rich protein DC2.15 [Vitis vinifera]
Vad03G006500.1	Molecular Function: DNA binding (GO:0003677);; Molecular Function: DNA-directed 5'-3' RNA polymerase activity (GO:0003899);; Biological Process: transcription, DNA-templated (GO:0006351);; Molecular Function: protein dimerization activity (GO:0046983);;	K03011|0|vvi:100258926|K03011 DNA-directed RNA polymerase II subunit RPB3 | (RefSeq) DNA-directed RNA polymerases II, IV and V subunit 3	[K]	Transcription	Putative uncharacterized protein {ECO:0000313|EMBL:CAN60923.1} OS=Vitis vinifera (Grape) PE=4 SV=1	hypothetical protein VITISV_019338 [Vitis vinifera]
Vad10G009220.1	--	--	--	--	Putative uncharacterized protein {ECO:0000313|EMBL:CAN80257.1} OS=Vitis vinifera (Grape) PE=4 SV=1	hypothetical protein VITISV_036998 [Vitis vinifera]
Vad16G000280.1	Cellular Component: cytoplasm (GO:0005737);; Biological Process: L-phenylalanine catabolic process (GO:0006559);; Biological Process: cinnamic acid biosynthetic process (GO:0009800);; Molecular Function: phenylalanine ammonia-lyase activity (GO:0045548);;	K10775|0|vvi:100854997|K10775 phenylalanine ammonia-lyase [EC:4.3.1.24] | (RefSeq) phenylalanine ammonia-lyase-like	[Q]	Secondary metabolites biosynthesis, transport and catabolism	Phenylalanine ammonia-lyase {ECO:0000256|RuleBase:RU003955} OS=Vitis vinifera (Grape) PE=3 SV=1	PREDICTED: phenylalanine ammonia-lyase-like [Vitis vinifera]
Vad01G008240.1	--	--	--	--	Putative uncharacterized protein {ECO:0000313|EMBL:CCB56643.1} OS=Vitis vinifera (Grape) PE=4 SV=1	PREDICTED: WAT1-related protein At5g40240 [Vitis vinifera]
Vad13G012370.1	Biological Process: cellular carbohydrate metabolic process (GO:0044262);; Molecular Function: transferase activity, transferring acyl groups, acyl groups converted into alkyl on transfer (GO:0046912);;	--	--	--	Putative uncharacterized protein {ECO:0000313|EMBL:CCB56685.1} OS=Vitis vinifera (Grape) PE=4 SV=1	PREDICTED: uncharacterized protein LOC100259569 [Vitis vinifera]
Vad19G010200.1	Molecular Function: hydrolase activity (GO:0016787);;	--	--	--	Putative uncharacterized protein {ECO:0000313|EMBL:CBI21711.3} OS=Vitis vinifera (Grape) PE=4 SV=1	unnamed protein product [Vitis vinifera]
Vad08G015650.1	Molecular Function: catalytic activity (GO:0003824);; Biological Process: metabolic process (GO:0008152);;	K17508|3.15817e-166|vvi:104880100|K17508 protein phosphatase PTC7 [EC:3.1.3.16] | (RefSeq) probable protein phosphatase 2C 55	[T]	Signal transduction mechanisms	Putative uncharacterized protein {ECO:0000313|EMBL:CCB55120.1} OS=Vitis vinifera (Grape) PE=4 SV=1	PREDICTED: probable protein phosphatase 2C 55 [Vitis vinifera]
Vad12G011820.1	--	--	--	--	Putative uncharacterized protein {ECO:0000313|EMBL:CAN64321.1} OS=Vitis vinifera (Grape) PE=4 SV=1	hypothetical protein VITISV_007701 [Vitis vinifera]
Vad10G006750.1	--	--	--	--	Putative uncharacterized protein {ECO:0000313|EMBL:CCB55663.1} OS=Vitis vinifera (Grape) PE=4 SV=1	--
Vad04G002100.1	Molecular Function: aminoacyl-tRNA hydrolase activity (GO:0004045);; Molecular Function: protein tyrosine phosphatase activity (GO:0004725);; Biological Process: peptidyl-tyrosine dephosphorylation (GO:0035335);;	--	[S]	Function unknown	Putative uncharacterized protein {ECO:0000313|EMBL:CCB46635.1} OS=Vitis vinifera (Grape) PE=4 SV=1	PREDICTED: putative peptidyl-tRNA hydrolase PTRHD1 [Vitis vinifera]
Vad12G007160.1	Molecular Function: nucleotide binding (GO:0000166);; Biological Process: cation transport (GO:0006812);; Cellular Component: integral component of membrane (GO:0016021);; Molecular Function: cation-transporting ATPase activity (GO:0019829);; Molecular Function: metal ion binding (GO:0046872);;	K01537|6.87404e-87|cit:107175731|K01537 Ca2+-transporting ATPase [EC:3.6.3.8] | (RefSeq) calcium-transporting ATPase 12, plasma membrane-type-like	[P]	Inorganic ion transport and metabolism	Putative uncharacterized protein {ECO:0000313|EMBL:CAN71611.1} OS=Vitis vinifera (Grape) PE=4 SV=1	hypothetical protein VITISV_000631 [Vitis vinifera]
Vad01G015100.1	Molecular Function: structural constituent of ribosome (GO:0003735);; Cellular Component: nucleolus (GO:0005730);; Cellular Component: mitochondrion (GO:0005739);; Biological Process: translation (GO:0006412);; Cellular Component: chloroplast (GO:0009507);; Cellular Component: cytosolic large ribosomal subunit (GO:0022625);;	K02889|6.41143e-116|vvi:100262509|K02889 large subunit ribosomal protein L21e | (RefSeq) 60S ribosomal protein L21-1-like	[J]	Translation, ribosomal structure and biogenesis	Putative uncharacterized protein {ECO:0000313|EMBL:CAN82115.1} OS=Vitis vinifera (Grape) PE=4 SV=1	PREDICTED: 60S ribosomal protein L21-1 [Vitis vinifera]
Vad19G004090.1	Biological Process: intracellular protein transport (GO:0006886);; Biological Process: ER to Golgi vesicle-mediated transport (GO:0006888);; Molecular Function: zinc ion binding (GO:0008270);; Cellular Component: COPII vesicle coat (GO:0030127);;	K14007|0|vvi:100265768|K14007 protein transport protein SEC24 | (RefSeq) protein transport protein Sec24-like At4g32640	[U]	Intracellular trafficking, secretion, and vesicular transport	Putative uncharacterized protein {ECO:0000313|EMBL:CBI20515.3} OS=Vitis vinifera (Grape) PE=4 SV=1	PREDICTED: protein transport protein Sec24-like At4g32640 [Vitis vinifera]
Vad02G001220.1	Biological Process: photosystem II assembly (GO:0010207);;	--	[YU]	--	Putative uncharacterized protein {ECO:0000313|EMBL:CCB58242.1} OS=Vitis vinifera (Grape) PE=4 SV=1	PREDICTED: uncharacterized protein LOC100246730 [Vitis vinifera]
Vad04G009800.1	Molecular Function: DNA binding (GO:0003677);; Molecular Function: DNA-binding transcription factor activity (GO:0003700);; Cellular Component: nucleus (GO:0005634);; Biological Process: regulation of transcription, DNA-templated (GO:0006355);; Biological Process: animal organ morphogenesis (GO:0009887);; Molecular Function: oxidoreductase activity (GO:0016491);;	K09285|0|vvi:100241060|K09285 AP2-like factor, ANT lineage | (RefSeq) AP2-like ethylene-responsive transcription factor BBM	--	--	Putative uncharacterized protein {ECO:0000313|EMBL:CCB44497.1} OS=Vitis vinifera (Grape) PE=4 SV=1	hypothetical protein VITISV_008633 [Vitis vinifera]
Vad01G004330.1	--	--	--	--	Putative uncharacterized protein {ECO:0000313|EMBL:CCB50852.1} OS=Vitis vinifera (Grape) PE=4 SV=1	PREDICTED: loricrin-like [Vitis vinifera]
Vad01G009670.1	Biological Process: response to hormone (GO:0009725);; Biological Process: response to lipid (GO:0033993);; Biological Process: biological_process (GO:0044699);; Biological Process: regulation of biological process (GO:0050789);; Biological Process: response to oxygen-containing compound (GO:1901700);;	--	--	--	Putative uncharacterized protein {ECO:0000313|EMBL:CCB56558.1} OS=Vitis vinifera (Grape) PE=4 SV=1	PREDICTED: transcription factor TCP15-like [Vitis vinifera]
Vad13G011130.1	Cellular Component: cytoplasm (GO:0005737);; Molecular Function: metal ion binding (GO:0046872);;	--	[R]	General function prediction only	Putative uncharacterized protein {ECO:0000313|EMBL:CCB49510.1} OS=Vitis vinifera (Grape) PE=4 SV=1	zinc finger CCCH domain-containing protein 30-like [Vitis vinifera]
Vad12G006810.1	Molecular Function: NADH dehydrogenase activity (GO:0003954);; Molecular Function: calcium ion binding (GO:0005509);; Cellular Component: mitochondrial intermembrane space (GO:0005758);; Cellular Component: peroxisome (GO:0005777);; Molecular Function: disulfide oxidoreductase activity (GO:0015036);; Cellular Component: extrinsic component of mitochondrial inner membrane (GO:0031314);; Molecular …	K17871|0|vvi:100254643|K17871 NADH:ubiquinone reductase (non-electrogenic) [EC:1.6.5.9] | (RefSeq) external alternative NAD(P)H-ubiquinone oxidoreductase B1, mitochondrial	[C]	Energy production and conversion	Putative uncharacterized protein {ECO:0000313|EMBL:CAN59739.1} OS=Vitis vinifera (Grape) PE=4 SV=1	hypothetical protein VITISV_027063 [Vitis vinifera]
Vad10G013010.1	--	--	--	--	Putative uncharacterized protein {ECO:0000313|EMBL:CBI29024.3} OS=Vitis vinifera (Grape) PE=4 SV=1	unnamed protein product [Vitis vinifera]
Vad07G002000.1	Molecular Function: translation elongation factor activity (GO:0003746);; Molecular Function: GTPase activity (GO:0003924);; Molecular Function: ATP binding (GO:0005524);; Molecular Function: GTP binding (GO:0005525);; Cellular Component: cell wall (GO:0005618);; Cellular Component: mitochondrion (GO:0005739);; Biological Process: obsolete GTP catabolic process (GO:0006184);; Biological Process: …	K02358|0|vvi:104879774|K02358 elongation factor Tu | (RefSeq) elongation factor Tu, mitochondrial	[J]	Translation, ribosomal structure and biogenesis	Elongation factor Tu {ECO:0000256|RuleBase:RU004061} OS=Vitis vinifera (Grape) PE=3 SV=1	PREDICTED: elongation factor Tu, mitochondrial [Vitis vinifera]
Vad14G012540.1	Molecular Function: protein kinase activity (GO:0004672);; Molecular Function: ATP binding (GO:0005524);; Biological Process: protein phosphorylation (GO:0006468);; Molecular Function: zinc ion binding (GO:0008270);; Cellular Component: integral component of membrane (GO:0016021);;	--	--	--	Putative uncharacterized protein {ECO:0000313|EMBL:CAN80445.1} OS=Vitis vinifera (Grape) PE=4 SV=1	PREDICTED: probable inactive receptor kinase At2g26730 [Vitis vinifera]
Vad15G000720.1	--	--	--	--	Putative uncharacterized protein {ECO:0000313|EMBL:CBI39983.3} OS=Vitis vinifera (Grape) PE=4 SV=1	unnamed protein product [Vitis vinifera]
Vad06G009980.1	Molecular Function: ATP binding (GO:0005524);; Biological Process: photosynthesis (GO:0015979);; Biological Process: chlorophyll biosynthetic process (GO:0015995);; Molecular Function: magnesium chelatase activity (GO:0016851);; Molecular Function: nucleoside-triphosphatase activity (GO:0017111);;	K03404|0|vvi:100243048|K03404 magnesium chelatase subunit D [EC:6.6.1.1] | (RefSeq) magnesium-chelatase subunit ChlD, chloroplastic	--	--	Uncharacterized protein {ECO:0000313|EMBL:ERP56854.1} OS=Populus trichocarpa (Western balsam poplar) PE=4 SV=1	PREDICTED: magnesium-chelatase subunit ChlD, chloroplastic [Vitis vinifera]
Vad08G011890.1	Biological Process: metabolic process (GO:0008152);; Molecular Function: anthocyanidin 3-O-glucosyltransferase activity (GO:0047213);;	K13496|0|vvi:100246902|K13496 UDP-glucosyl transferase 73C [EC:2.4.1.-] | (RefSeq) UDP-glycosyltransferase 73C3	[GC]	--	Putative uncharacterized protein {ECO:0000313|EMBL:CAN83017.1} OS=Vitis vinifera (Grape) PE=3 SV=1	PREDICTED: UDP-glycosyltransferase 73C3 [Vitis vinifera]
Vad04G013280.1	Molecular Function: phosphoric ester hydrolase activity (GO:0042578);;	--	[I]	Lipid transport and metabolism	Putative uncharacterized protein {ECO:0000313|EMBL:CBI37652.3} OS=Vitis vinifera (Grape) PE=4 SV=1	unnamed protein product [Vitis vinifera]
Vad04G003480.1	--	K17710|0|vvi:100267944|K17710 pentatricopeptide repeat domain-containing protein 1 | (RefSeq) pentatricopeptide repeat-containing protein At5g25630	[R]	General function prediction only	Putative uncharacterized protein {ECO:0000313|EMBL:CCB46722.1} OS=Vitis vinifera (Grape) PE=4 SV=1	PREDICTED: pentatricopeptide repeat-containing protein At5g25630 [Vitis vinifera]
Vad04G006270.1	Cellular Component: membrane (GO:0016020);;	K15289|0|vvi:100247496|K15289 solute carrier family 35, member F5 | (RefSeq) thiamine-repressible mitochondrial transport protein THI74	[S]	Function unknown	Putative uncharacterized protein {ECO:0000313|EMBL:CBI21161.3} OS=Vitis vinifera (Grape) PE=4 SV=1	PREDICTED: thiamine-repressible mitochondrial transport protein THI74-like [Vitis vinifera]
Vad13G010000.1	Biological Process: defense response (GO:0006952);; Molecular Function: ADP binding (GO:0043531);;	--	[T]	Signal transduction mechanisms	Putative uncharacterized protein {ECO:0000313|EMBL:CAN73260.1} OS=Vitis vinifera (Grape) PE=4 SV=1	hypothetical protein VITISV_003723 [Vitis vinifera]
Vad08G009910.1	--	--	--	--	Putative uncharacterized protein {ECO:0000313|EMBL:CCB55479.1} OS=Vitis vinifera (Grape) PE=4 SV=1	PREDICTED: transcription repressor OFP6 [Vitis vinifera]
Vad10G005410.1	Molecular Function: catalytic activity (GO:0003824);; Biological Process: metabolic process (GO:0008152);;	--	[I]	Lipid transport and metabolism	Putative uncharacterized protein {ECO:0000313|EMBL:CBI35692.3} OS=Vitis vinifera (Grape) PE=4 SV=1	PREDICTED: bifunctional epoxide hydrolase 2 isoform X1 [Vitis vinifera]
Vad12G009280.1	Biological Process: response to stimulus (GO:0050896);;	--	--	--	Putative uncharacterized protein {ECO:0000313|EMBL:CCB48714.1} OS=Vitis vinifera (Grape) PE=4 SV=1	PREDICTED: TMV resistance protein N-like isoform X3 [Vitis vinifera]
Vad06G007900.1	Biological Process: photosystem II assembly (GO:0010207);; Biological Process: mRNA modification (GO:0016556);;	--	[T]	Signal transduction mechanisms	Putative uncharacterized protein {ECO:0000313|EMBL:CBI24393.3} OS=Vitis vinifera (Grape) PE=4 SV=1	PREDICTED: uncharacterized protein LOC100265104 [Vitis vinifera]
Vad0G017900.1	--	--	--	--	Family transcriptional regulator {ECO:0000313|EMBL:EKU23465.1} OS=Nannochloropsis gaditana CCMP526 PE=4 SV=1	family transcriptional regulator [Nannochloropsis gaditana CCMP526]
Vad19G005590.1	Cellular Component: membrane (GO:0016020);; Biological Process: vesicle-mediated transport (GO:0016192);;	K08503|5.41892e-169|vvi:100250369|K08503 syntaxin of plants SYP5 | (RefSeq) syntaxin-51	[U]	Intracellular trafficking, secretion, and vesicular transport	Putative uncharacterized protein {ECO:0000313|EMBL:CCB50700.1} OS=Vitis vinifera (Grape) PE=4 SV=1	PREDICTED: syntaxin-51 [Vitis vinifera]
Vad03G005620.1	Molecular Function: copper ion binding (GO:0005507);; Molecular Function: electron transfer activity (GO:0009055);;	--	--	--	Putative uncharacterized protein {ECO:0000313|EMBL:CBI32459.3} OS=Vitis vinifera (Grape) PE=4 SV=1	PREDICTED: uncharacterized protein LOC100248603 [Vitis vinifera]
Vad18G003480.1	Molecular Function: translation initiation factor activity (GO:0003743);; Biological Process: translational initiation (GO:0006413);; Biological Process: RNA metabolic process (GO:0016070);;	K03262|0|vvi:100262554|K03262 translation initiation factor 5 | (RefSeq) eukaryotic translation initiation factor 5	[J]	Translation, ribosomal structure and biogenesis	Putative uncharacterized protein {ECO:0000313|EMBL:CCB45531.1} OS=Vitis vinifera (Grape) PE=4 SV=1	PREDICTED: eukaryotic translation initiation factor 5-like [Vitis vinifera]
Vad10G002040.1	--	--	--	--	Uncharacterized protein {ECO:0000313|EMBL:KDP20677.1} OS=Jatropha curcas (Barbados nut) PE=4 SV=1	PREDICTED: uncharacterized protein LOC100242437 [Vitis vinifera]
Vad0G027370.1	--	--	[J]	Translation, ribosomal structure and biogenesis	Putative uncharacterized protein {ECO:0000313|EMBL:EFN53033.1} OS=Chlorella variabilis (Green alga) PE=3 SV=1	PREDICTED: probable arginine--tRNA ligase, cytoplasmic [Elaeis guineensis]
Vad13G012090.1	Molecular Function: protein kinase activity (GO:0004672);; Molecular Function: purine ribonucleoside binding (GO:0032550);; Molecular Function: adenyl ribonucleotide binding (GO:0032559);; Molecular Function: anion binding (GO:0043168);;	--	[T]	Signal transduction mechanisms	Putative uncharacterized protein {ECO:0000313|EMBL:CBI32180.3} OS=Vitis vinifera (Grape) PE=4 SV=1	unnamed protein product [Vitis vinifera]
Vad17G002290.1	Molecular Function: hydrolase activity, hydrolyzing O-glycosyl compounds (GO:0004553);; Biological Process: carbohydrate metabolic process (GO:0005975);;	K05350|0|vvi:100255914|K05350 beta-glucosidase [EC:3.2.1.21] | (RefSeq) beta-glucosidase 44	[G]	Carbohydrate transport and metabolism	Putative uncharacterized protein {ECO:0000313|EMBL:CBI15543.3} OS=Vitis vinifera (Grape) PE=3 SV=1	PREDICTED: beta-glucosidase 44 [Vitis vinifera]
Vad12G013150.1	--	--	--	--	Putative uncharacterized protein {ECO:0000313|EMBL:CCB46131.1} OS=Vitis vinifera (Grape) PE=4 SV=1	PREDICTED: uncharacterized protein LOC100241871 [Vitis vinifera]
Vad13G005230.1	--	--	--	--	Putative uncharacterized protein {ECO:0000313|EMBL:CCB56204.1} OS=Vitis vinifera (Grape) PE=4 SV=1	PREDICTED: uncharacterized protein LOC104881153 [Vitis vinifera]
Vad08G002510.1	Molecular Function: nucleic acid binding (GO:0003676);; Molecular Function: ATP binding (GO:0005524);; Molecular Function: ATP-dependent helicase activity (GO:0008026);;	K14442|0|vvi:100252028|K14442 ATP-dependent RNA helicase DHX36 [EC:3.6.4.13] | (RefSeq) DExH-box ATP-dependent RNA helicase DExH1	[A]	RNA processing and modification	Putative uncharacterized protein {ECO:0000313|EMBL:CCB61573.1} OS=Vitis vinifera (Grape) PE=4 SV=1	PREDICTED: ATP-dependent RNA helicase DHX36 isoform X1 [Vitis vinifera]
Vad0G009080.1	Molecular Function: catalytic activity (GO:0003824);;	--	[T]	Signal transduction mechanisms	GTP pyrophosphokinase-like protein {ECO:0000313|EMBL:EED94478.1} (Fragment) OS=Thalassiosira pseudonana (Marine diatom) PE=4 SV=1	GTP pyrophosphokinase-like protein [Thalassiosira pseudonana CCMP1335]
Vad06G001300.1	Molecular Function: DNA binding (GO:0003677);; Biological Process: regulation of transcription, DNA-templated (GO:0006355);;	--	--	--	Putative uncharacterized protein {ECO:0000313|EMBL:CAN73321.1} OS=Vitis vinifera (Grape) PE=4 SV=1	hypothetical protein VITISV_034301 [Vitis vinifera]
Vad05G012230.1	--	--	[TZ]	--	Formin-like protein {ECO:0000256|RuleBase:RU361260} OS=Vitis vinifera (Grape) PE=3 SV=1	PREDICTED: formin-like protein 1 [Vitis vinifera]
Vad06G001060.1	--	K21027|3.52923e-162|vvi:100265527|K21027 tRNA-5-taurinomethyluridine 2-sulfurtransferase [EC:2.8.1.14] | (RefSeq) tRNA-specific 2-thiouridylase MnmA	[J]	Translation, ribosomal structure and biogenesis	Putative uncharacterized protein {ECO:0000313|EMBL:CCB43711.1} OS=Vitis vinifera (Grape) PE=3 SV=1	PREDICTED: mitochondrial tRNA-specific 2-thiouridylase 1 [Vitis vinifera]
Vad13G011770.1	Molecular Function: hydrolase activity, hydrolyzing O-glycosyl compounds (GO:0004553);; Biological Process: carbohydrate metabolic process (GO:0005975);;	K01188|2.09349e-127|vvi:100249344|K01188 beta-glucosidase [EC:3.2.1.21] | (RefSeq) beta-glucosidase 12	[G]	Carbohydrate transport and metabolism	Putative uncharacterized protein {ECO:0000313|EMBL:CBI24829.3} OS=Vitis vinifera (Grape) PE=3 SV=1	unnamed protein product [Vitis vinifera]
Vad05G008960.1	Molecular Function: protein serine/threonine kinase activity (GO:0004674);; Molecular Function: ATP binding (GO:0005524);; Cellular Component: Golgi apparatus (GO:0005794);; Cellular Component: plasma membrane (GO:0005886);; Biological Process: protein phosphorylation (GO:0006468);; Cellular Component: plasmodesma (GO:0009506);; Cellular Component: integral component of membrane (GO:0016021);;	--	--	--	Putative uncharacterized protein {ECO:0000313|EMBL:CAN69461.1} OS=Vitis vinifera (Grape) PE=3 SV=1	PREDICTED: probable receptor protein kinase TMK1 [Vitis vinifera]
Vad0G021070.1	Cellular Component: cytosol (GO:0005829);; Biological Process: protein targeting to membrane (GO:0006612);; Biological Process: membrane fusion (GO:0006944);; Biological Process: response to cold (GO:0009409);; Cellular Component: plasmodesma (GO:0009506);; Biological Process: response to wounding (GO:0009611);; Biological Process: response to mechanical stimulus (GO:0009612);; Biological Process…	--	[R]	General function prediction only	Putative uncharacterized protein {ECO:0000313|EMBL:CBI19477.3} OS=Vitis vinifera (Grape) PE=4 SV=1	PREDICTED: leucine-rich repeat extensin-like protein 3 [Vitis vinifera]
Vad0G012860.1	Biological Process: signal transduction (GO:0007165);; Molecular Function: kinase activity (GO:0016301);;	--	[T]	Signal transduction mechanisms	Two component histidine kinase, putative {ECO:0000313|EMBL:EEF27375.1} OS=Ricinus communis (Castor bean) PE=4 SV=1	two component histidine kinase, putative [Ricinus communis]
Vad10G005160.1	Molecular Function: serine-type carboxypeptidase activity (GO:0004185);; Biological Process: proteolysis (GO:0006508);;	K16297|0|vvi:100265560|K16297 serine carboxypeptidase-like clade II [EC:3.4.16.-] | (RefSeq) serine carboxypeptidase-like 31	[OE]	--	Putative uncharacterized protein {ECO:0000313|EMBL:CBI18754.3} OS=Vitis vinifera (Grape) PE=4 SV=1	unnamed protein product [Vitis vinifera]
Vad07G012140.1	Molecular Function: nucleic acid binding (GO:0003676);;	--	--	--	Putative uncharacterized protein {ECO:0000313|EMBL:CCB52376.1} OS=Vitis vinifera (Grape) PE=4 SV=1	unnamed protein product [Vitis vinifera]
Vad18G000860.1	Molecular Function: FMN binding (GO:0010181);; Molecular Function: oxidoreductase activity (GO:0016491);; Biological Process: oxidation-reduction process (GO:0055114);;	K05894|0|vvi:100256540|K05894 12-oxophytodienoic acid reductase [EC:1.3.1.42] | (RefSeq) 12-oxophytodienoate reductase 2	[CR]	--	Putative uncharacterized protein {ECO:0000313|EMBL:CCB62656.1} OS=Vitis vinifera (Grape) PE=4 SV=1	PREDICTED: 12-oxophytodienoate reductase 2-like [Vitis vinifera]
Vad14G006860.1	--	--	[S]	Function unknown	Putative uncharacterized protein {ECO:0000313|EMBL:CCB57727.1} OS=Vitis vinifera (Grape) PE=4 SV=1	PREDICTED: HEAT repeat-containing protein 5B [Vitis vinifera]
Vad08G001980.1	--	--	--	--	Putative uncharacterized protein {ECO:0000313|EMBL:CCB61549.1} OS=Vitis vinifera (Grape) PE=4 SV=1	PREDICTED: uncharacterized protein LOC100254774 isoform X1 [Vitis vinifera]
Vad12G005490.1	Molecular Function: nutrient reservoir activity (GO:0045735);;	--	--	--	Putative uncharacterized protein {ECO:0000313|EMBL:CBI28953.3} OS=Vitis vinifera (Grape) PE=4 SV=1	PREDICTED: glutelin type-B 5 [Vitis vinifera]
Vad14G011620.1	--	--	--	--	Putative uncharacterized protein {ECO:0000313|EMBL:CAN59885.1} OS=Vitis vinifera (Grape) PE=4 SV=1	PREDICTED: cyclin-dependent protein kinase inhibitor SMR3 [Vitis vinifera]
Vad15G008860.1	Biological Process: ethylene biosynthetic process (GO:0009693);; Biological Process: response to abscisic acid (GO:0009737);; Biological Process: response to chitin (GO:0010200);; Molecular Function: transferase activity (GO:0016740);; Molecular Function: 1-aminocyclopropane-1-carboxylate synthase activity (GO:0016847);; Molecular Function: pyridoxal phosphate binding (GO:0030170);; Biological Pr…	K20772|0|vvi:100261943|K20772 1-aminocyclopropane-1-carboxylate synthase 1/2/6 [EC:4.4.1.14] | (RefSeq) 1-aminocyclopropane-1-carboxylate synthase 1	[T]	Signal transduction mechanisms	Putative uncharacterized protein {ECO:0000313|EMBL:CAN69483.1} OS=Vitis vinifera (Grape) PE=3 SV=1	hypothetical protein VITISV_035777 [Vitis vinifera]
Vad10G005420.1	--	--	[D]	Cell cycle control, cell division, chromosome partitioning	Putative uncharacterized protein {ECO:0000313|EMBL:CBI35691.3} OS=Vitis vinifera (Grape) PE=4 SV=1	PREDICTED: uncharacterized protein LOC100249879 [Vitis vinifera]
Vad16G010320.1	Molecular Function: protein serine/threonine kinase activity (GO:0004674);; Molecular Function: ATP binding (GO:0005524);; Biological Process: protein phosphorylation (GO:0006468);;	K04733|0|vvi:100243119|K04733 interleukin-1 receptor-associated kinase 4 [EC:2.7.11.1] | (RefSeq) rust resistance kinase Lr10-like	[T]	Signal transduction mechanisms	Putative uncharacterized protein {ECO:0000313|EMBL:CCB50115.1} OS=Vitis vinifera (Grape) PE=3 SV=1	PREDICTED: glycerophosphodiester phosphodiesterase protein kinase domain-containing GDPDL2-like [Vitis vinifera]
Vad09G009740.1	Cellular Component: membrane (GO:0016020);; Molecular Function: transferase activity, transferring phosphorus-containing groups (GO:0016772);;	--	--	--	Putative uncharacterized protein {ECO:0000313|EMBL:CCB49730.1} OS=Vitis vinifera (Grape) PE=4 SV=1	unnamed protein product [Vitis vinifera]
Vad12G001750.1	Molecular Function: protein serine/threonine kinase activity (GO:0004674);; Molecular Function: non-membrane spanning protein tyrosine kinase activity (GO:0004715);; Molecular Function: ATP binding (GO:0005524);; Biological Process: protein phosphorylation (GO:0006468);;	--	[T]	Signal transduction mechanisms	Putative uncharacterized protein {ECO:0000313|EMBL:CBI21988.3} OS=Vitis vinifera (Grape) PE=3 SV=1	PREDICTED: serine/threonine-protein kinase EDR1 isoform X2 [Vitis vinifera]
Vad03G010300.1	Molecular Function: translation elongation factor activity (GO:0003746);; Molecular Function: GTPase activity (GO:0003924);; Molecular Function: GTP binding (GO:0005525);; Cellular Component: intracellular (GO:0005622);; Biological Process: obsolete GTP catabolic process (GO:0006184);; Biological Process: translational elongation (GO:0006414);; Molecular Function: zinc ion binding (GO:0008270);;	K14416|0|vvi:100262342|K14416 elongation factor 1 alpha-like protein | (RefSeq) HBS1-like protein	[J]	Translation, ribosomal structure and biogenesis	Putative uncharacterized protein {ECO:0000313|EMBL:CBI34018.3} OS=Vitis vinifera (Grape) PE=4 SV=1	PREDICTED: HBS1-like protein isoform X1 [Vitis vinifera]
Vad09G008010.1	Biological Process: defense response (GO:0006952);; Molecular Function: ADP binding (GO:0043531);;	K13459|0|vvi:100251433|K13459 disease resistance protein RPS2 | (RefSeq) probable disease resistance protein At1g61300	[T]	Signal transduction mechanisms	Putative uncharacterized protein {ECO:0000313|EMBL:CCB57562.1} OS=Vitis vinifera (Grape) PE=4 SV=1	PREDICTED: probable disease resistance protein At1g61300 isoform X1 [Vitis vinifera]
Vad14G005910.1	--	K07466|2.12344e-18|vvi:100241314|K07466 replication factor A1 | (RefSeq) uncharacterized protein At4g28440-like	--	--	Putative uncharacterized protein {ECO:0000313|EMBL:CAN71591.1} OS=Vitis vinifera (Grape) PE=4 SV=1	hypothetical protein VITISV_015930 [Vitis vinifera]
Vad12G006410.1	Molecular Function: carboxy-lyase activity (GO:0016831);; Biological Process: carboxylic acid metabolic process (GO:0019752);;	K01592|0|cit:102607021|K01592 tyrosine decarboxylase [EC:4.1.1.25] | (RefSeq) aromatic-L-amino-acid decarboxylase-like	[E]	Amino acid transport and metabolism	Tryptophan decarboxylase {ECO:0000313|EMBL:AAB39709.1} OS=Camptotheca acuminata (Happy tree) PE=3 SV=1	PREDICTED: aromatic-L-amino-acid decarboxylase-like [Nicotiana tomentosiformis]
Vad13G001400.1	--	--	--	--	Putative uncharacterized protein {ECO:0000313|EMBL:CBI25392.3} OS=Vitis vinifera (Grape) PE=4 SV=1	PREDICTED: LOB domain-containing protein 15 [Vitis vinifera]
Vad0G001530.1	--	--	--	--	Uncharacterized protein {ECO:0000313|EMBL:ETI45140.1} OS=Phytophthora parasitica P1569 PE=4 SV=1	PREDICTED: serine/threonine-protein phosphatase 1-like [Cucumis sativus]
Vad09G005990.1	Molecular Function: kinase activity (GO:0016301);; Biological Process: phosphorylation (GO:0016310);; Molecular Function: 2-alkenal reductase [NAD(P)] activity (GO:0032440);; Biological Process: oxidation-reduction process (GO:0055114);;	--	[R]	General function prediction only	Putative uncharacterized protein {ECO:0000313|EMBL:CCB59612.1} OS=Vitis vinifera (Grape) PE=4 SV=1	PREDICTED: protein TOO MANY MOUTHS [Vitis vinifera]
Vad06G004400.1	Biological Process: cellulose biosynthetic process (GO:0030244);; Biological Process: Golgi vesicle transport (GO:0048193);;	--	--	--	Putative uncharacterized protein {ECO:0000313|EMBL:CBI16055.3} OS=Vitis vinifera (Grape) PE=4 SV=1	PREDICTED: tropomyosin alpha-4 chain isoform X2 [Vitis vinifera]
Vad10G012940.1	Molecular Function: protein tyrosine kinase activity (GO:0004713);; Molecular Function: ATP binding (GO:0005524);; Biological Process: protein phosphorylation (GO:0006468);;	--	--	--	Putative uncharacterized protein {ECO:0000313|EMBL:CBI29039.3} OS=Vitis vinifera (Grape) PE=4 SV=1	unnamed protein product [Vitis vinifera]
Vad0G010530.1	Biological Process: DNA metabolic process (GO:0006259);; Biological Process: cellular response to stress (GO:0033554);; Molecular Function: organic cyclic compound binding (GO:0097159);; Molecular Function: heterocyclic compound binding (GO:1901363);;	K03553|1.06336e-76|mus:103969926|K03553 recombination protein RecA | (RefSeq) uncharacterized protein LOC103969926 isoform X1	[L]	Replication, recombination and repair	Recombinase A protein (RecA) {ECO:0000313|EMBL:CBK23010.2} OS=Blastocystis hominis PE=3 SV=1	Recombinase A protein (RecA) [Blastocystis hominis]
Vad18G017550.1	--	--	--	--	Putative uncharacterized protein {ECO:0000313|EMBL:CCB56097.1} OS=Vitis vinifera (Grape) PE=4 SV=1	unnamed protein product [Vitis vinifera]
Vad03G009690.1	Molecular Function: hydrolase activity, acting on glycosyl bonds (GO:0016798);;	--	[G]	Carbohydrate transport and metabolism	Putative uncharacterized protein {ECO:0000313|EMBL:CBI29488.3} OS=Vitis vinifera (Grape) PE=4 SV=1	unnamed protein product [Vitis vinifera]
Vad13G009600.1	Molecular Function: DNA binding (GO:0003677);; Cellular Component: nucleus (GO:0005634);; Biological Process: DNA replication (GO:0006260);; Molecular Function: zinc ion binding (GO:0008270);;	K07466|2.27212e-49|vvi:100255412|K07466 replication factor A1 | (RefSeq) replication protein A 70 kDa DNA-binding subunit B	[L]	Replication, recombination and repair	Putative uncharacterized protein {ECO:0000313|EMBL:CBI21889.3} OS=Vitis vinifera (Grape) PE=4 SV=1	unnamed protein product [Vitis vinifera]
Vad15G003650.1	Molecular Function: DNA binding (GO:0003677);; Molecular Function: chromatin binding (GO:0003682);; Molecular Function: DNA-binding transcription factor activity (GO:0003700);; Biological Process: regulation of transcription, DNA-templated (GO:0006355);; Biological Process: pollen sperm cell differentiation (GO:0048235);;	K09422|0|vvi:100256500|K09422 myb proto-oncogene protein, plant | (RefSeq) transcription factor MYB48	[K]	Transcription	Putative uncharacterized protein {ECO:0000313|EMBL:CBI16634.3} OS=Vitis vinifera (Grape) PE=4 SV=1	PREDICTED: transcription factor MYB48 [Vitis vinifera]
Vad12G005850.1	--	--	[BK]	--	Putative uncharacterized protein {ECO:0000313|EMBL:CCB52071.1} OS=Vitis vinifera (Grape) PE=4 SV=1	PREDICTED: probable histone-lysine N-methyltransferase ATXR3 [Vitis vinifera]
Vad07G002560.1	Molecular Function: serine-type endopeptidase activity (GO:0004252);; Cellular Component: mitochondrion (GO:0005739);; Biological Process: proteolysis (GO:0006508);; Cellular Component: chloroplast stromal thylakoid (GO:0009533);; Cellular Component: chloroplast thylakoid membrane (GO:0009535);; Biological Process: chloroplast organization (GO:0009658);; Cellular Component: chloroplast envelope (…	--	[O]	Posttranslational modification, protein turnover, chaperones	Putative uncharacterized protein {ECO:0000313|EMBL:CBI32271.3} OS=Vitis vinifera (Grape) PE=4 SV=1	PREDICTED: protease Do-like 2, chloroplastic [Vitis vinifera]
Vad01G000660.1	Cellular Component: plasma membrane (GO:0005886);; Molecular Function: methyltransferase activity (GO:0008168);; Biological Process: methylation (GO:0032259);;	--	--	--	Putative uncharacterized protein {ECO:0000313|EMBL:CCB51060.1} OS=Vitis vinifera (Grape) PE=4 SV=1	PREDICTED: probable methyltransferase PMT5 [Vitis vinifera]
Vad10G012520.1	--	--	--	--	Putative uncharacterized protein {ECO:0000313|EMBL:CBI39693.3} OS=Vitis vinifera (Grape) PE=4 SV=1	unnamed protein product [Vitis vinifera]
Vad15G008320.1	Biological Process: systemic acquired resistance (GO:0009627);; Biological Process: regulation of defense response (GO:0031347);;	--	[TZ]	--	Putative uncharacterized protein {ECO:0000313|EMBL:CCB62476.1} OS=Vitis vinifera (Grape) PE=4 SV=1	PREDICTED: uncharacterized protein LOC100260179 [Vitis vinifera]
Vad15G002530.1	Molecular Function: GTPase activity (GO:0003924);; Molecular Function: GTP binding (GO:0005525);; Biological Process: obsolete GTP catabolic process (GO:0006184);;	K01528|0|vvi:100266825|K01528 dynamin GTPase [EC:3.6.5.5] | (RefSeq) dynamin-related protein 1E	[UR]	--	Putative uncharacterized protein {ECO:0000313|EMBL:CBI16731.3} OS=Vitis vinifera (Grape) PE=3 SV=1	PREDICTED: dynamin-related protein 1E [Vitis vinifera]
Vad07G005430.1	Biological Process: activation of MAPKK activity (GO:0000186);; Molecular Function: MAP kinase kinase kinase activity (GO:0004709);; Molecular Function: ATP binding (GO:0005524);;	K13436|0|vvi:100265884|K13436 pto-interacting protein 1 [EC:2.7.11.1] | (RefSeq) pto-interacting protein 1	[T]	Signal transduction mechanisms	Putative uncharacterized protein {ECO:0000313|EMBL:CBI37022.3} OS=Vitis vinifera (Grape) PE=3 SV=1	PREDICTED: pto-interacting protein 1 [Vitis vinifera]
Vad11G007550.1	Molecular Function: translation initiation factor activity (GO:0003743);; Cellular Component: cell wall (GO:0005618);; Biological Process: translational initiation (GO:0006413);; Cellular Component: chloroplast (GO:0009507);;	K02520|0|vvi:100243384|K02520 translation initiation factor IF-3 | (RefSeq) translation initiation factor IF-3	--	--	Translation initiation factor IF-3 {ECO:0000256|RuleBase:RU000646} OS=Vitis vinifera (Grape) PE=3 SV=1	PREDICTED: translation initiation factor IF-3, chloroplastic isoform X1 [Vitis vinifera]
Vad11G003480.1	--	K17710|0|vvi:100247419|K17710 pentatricopeptide repeat domain-containing protein 1 | (RefSeq) pentatricopeptide repeat-containing protein At5g25630	[R]	General function prediction only	Putative uncharacterized protein {ECO:0000313|EMBL:CBI28063.3} OS=Vitis vinifera (Grape) PE=4 SV=1	PREDICTED: pentatricopeptide repeat-containing protein At5g25630 isoform X1 [Vitis vinifera]
Vad18G021420.1	Molecular Function: lactoylglutathione lyase activity (GO:0004462);; Molecular Function: protein serine/threonine kinase activity (GO:0004674);; Molecular Function: ATP binding (GO:0005524);; Biological Process: protein phosphorylation (GO:0006468);;	K00799|2.50914e-157|vvi:100253876|K00799 glutathione S-transferase [EC:2.5.1.18] | (RefSeq) glutathione transferase GST 23	[O]	Posttranslational modification, protein turnover, chaperones	Putative uncharacterized protein {ECO:0000313|EMBL:CBI18225.3} OS=Vitis vinifera (Grape) PE=4 SV=1	PREDICTED: glutathione transferase GST 23 [Vitis vinifera]
Vad10G013170.1	--	--	--	--	Putative uncharacterized protein {ECO:0000313|EMBL:CCB52080.1} OS=Vitis vinifera (Grape) PE=4 SV=1	--
Vad0G020990.1	--	--	--	--	Putative uncharacterized protein {ECO:0000313|EMBL:CCB57810.1} OS=Vitis vinifera (Grape) PE=4 SV=1	ORF 143 [Glycine max]
Vad13G010460.1	Molecular Function: DNA binding (GO:0003677);; Molecular Function: DNA-binding transcription factor activity (GO:0003700);; Biological Process: regulation of transcription, DNA-templated (GO:0006355);;	--	--	--	Putative uncharacterized protein {ECO:0000313|EMBL:CCB44570.1} OS=Vitis vinifera (Grape) PE=4 SV=1	PREDICTED: scarecrow-like protein 3 isoform X1 [Vitis vinifera]
Vad18G004780.1	Biological Process: drug transmembrane transport (GO:0006855);; Molecular Function: drug transmembrane transporter activity (GO:0015238);; Molecular Function: antiporter activity (GO:0015297);; Cellular Component: membrane (GO:0016020);;	K03327|0|vvi:100242048|K03327 multidrug resistance protein, MATE family | (RefSeq) protein DETOXIFICATION 27	[R]	General function prediction only	MATE efflux family protein {ECO:0000256|RuleBase:RU004914} OS=Vitis vinifera (Grape) PE=3 SV=1	unnamed protein product [Vitis vinifera]
Vad11G004010.1	Molecular Function: oxidoreductase activity, acting on paired donors, with incorporation or reduction of molecular oxygen, 2-oxoglutarate as one donor, and incorporation of one atom each of oxygen into both donors (GO:0016706);; Biological Process: oxidation-reduction process (GO:0055114);;	--	--	--	Putative uncharacterized protein {ECO:0000313|EMBL:CBI28109.3} OS=Vitis vinifera (Grape) PE=4 SV=1	unnamed protein product [Vitis vinifera]
Vad09G004610.1	Molecular Function: ATP binding (GO:0005524);; Biological Process: obsolete ATP catabolic process (GO:0006200);; Cellular Component: membrane (GO:0016020);; Molecular Function: ATPase activity (GO:0016887);;	--	[Q]	Secondary metabolites biosynthesis, transport and catabolism	Putative uncharacterized protein {ECO:0000313|EMBL:CCB59521.1} OS=Vitis vinifera (Grape) PE=4 SV=1	unnamed protein product [Vitis vinifera]
Vad09G008620.1	--	--	--	--	Putative uncharacterized protein {ECO:0000313|EMBL:CCB62729.1} OS=Vitis vinifera (Grape) PE=4 SV=1	--
Vad04G000700.1	--	--	[K]	Transcription	Putative uncharacterized protein {ECO:0000313|EMBL:CCB46551.1} OS=Vitis vinifera (Grape) PE=4 SV=1	PREDICTED: homeobox protein ATH1 [Vitis vinifera]
Vad12G001180.1	Cellular Component: peroxisome (GO:0005777);; Biological Process: response to heat (GO:0009408);; Biological Process: photorespiration (GO:0009853);; Biological Process: starch biosynthetic process (GO:0019252);;	--	[O]	Posttranslational modification, protein turnover, chaperones	Putative uncharacterized protein {ECO:0000313|EMBL:CBI22043.3} OS=Vitis vinifera (Grape) PE=3 SV=1	PREDICTED: uncharacterized protein LOC100267696 isoform X2 [Vitis vinifera]
Vad18G006100.1	Biological Process: cell fate specification (GO:0001708);; Molecular Function: DNA-binding transcription factor activity (GO:0003700);; Cellular Component: nucleus (GO:0005634);; Biological Process: regulation of transcription, DNA-templated (GO:0006355);; Biological Process: determination of bilateral symmetry (GO:0009855);; Biological Process: animal organ morphogenesis (GO:0009887);; Biologica…	--	[K]	Transcription	Putative uncharacterized protein {ECO:0000313|EMBL:CCB45710.1} OS=Vitis vinifera (Grape) PE=4 SV=1	PREDICTED: homeobox protein knotted-1-like 2 [Vitis vinifera]
Vad05G001300.1	Cellular Component: nucleus (GO:0005634);; Molecular Function: thioredoxin peroxidase activity (GO:0008379);; Biological Process: response to desiccation (GO:0009269);; Biological Process: maintenance of seed dormancy (GO:0010231);; Biological Process: oxidation-reduction process (GO:0055114);;	K11188|1.8792e-162|vvi:100259564|K11188 peroxiredoxin 6, 1-Cys peroxiredoxin [EC:1.11.1.7 1.11.1.15 3.1.1.-] | (RefSeq) 1-Cys peroxiredoxin	[O]	Posttranslational modification, protein turnover, chaperones	1-Cys peroxiredoxin {ECO:0000313|EMBL:AEL16456.1} OS=Vitis vinifera (Grape) PE=2 SV=1	1-Cys peroxiredoxin [Vitis vinifera]
Vad14G011070.1	--	--	--	--	Putative uncharacterized protein {ECO:0000313|EMBL:CBI17715.3} OS=Vitis vinifera (Grape) PE=4 SV=1	unnamed protein product [Vitis vinifera]
Vad10G003240.1	Molecular Function: serine-type endopeptidase activity (GO:0004252);; Biological Process: proteolysis (GO:0006508);; Molecular Function: identical protein binding (GO:0042802);; Biological Process: negative regulation of catalytic activity (GO:0043086);;	--	--	--	Putative uncharacterized protein {ECO:0000313|EMBL:CCB61096.1} OS=Vitis vinifera (Grape) PE=4 SV=1	unnamed protein product [Vitis vinifera]
Vad14G014220.1	Cellular Component: Golgi apparatus (GO:0005794);; Biological Process: protein glycosylation (GO:0006486);; Cellular Component: integral component of membrane (GO:0016021);; Molecular Function: carbohydrate binding (GO:0030246);; Molecular Function: galactosylxylosylprotein 3-beta-galactosyltransferase activity (GO:0047220);;	K14413|0|vvi:100242374|K14413 beta-1,3-galactosyltransferase [EC:2.4.1.-] | (RefSeq) beta-1,3-galactosyltransferase GALT1	[G]	Carbohydrate transport and metabolism	Putative uncharacterized protein {ECO:0000313|EMBL:CBI22225.3} OS=Vitis vinifera (Grape) PE=4 SV=1	PREDICTED: beta-1,3-galactosyltransferase 15-like [Vitis vinifera]
Vad18G006670.1	--	--	--	--	Putative uncharacterized protein {ECO:0000313|EMBL:CBI19392.3} OS=Vitis vinifera (Grape) PE=4 SV=1	unnamed protein product [Vitis vinifera]
Vad10G008660.1	Biological Process: proteolysis (GO:0006508);; Biological Process: protein processing involved in protein targeting to mitochondrion (GO:0006627);; Molecular Function: serine-type peptidase activity (GO:0008236);; Cellular Component: integral component of membrane (GO:0016021);; Cellular Component: mitochondrial inner membrane peptidase complex (GO:0042720);;	K09647|2.81703e-120|vvi:100258854|K09647 mitochondrial inner membrane protease subunit 1 [EC:3.4.21.-] | (RefSeq) mitochondrial inner membrane protease subunit 1	[O]	Posttranslational modification, protein turnover, chaperones	Putative uncharacterized protein {ECO:0000313|EMBL:CCB55774.1} OS=Vitis vinifera (Grape) PE=3 SV=1	PREDICTED: mitochondrial inner membrane protease subunit 1-like [Vitis vinifera]
Vad03G007950.1	--	--	--	--	Putative uncharacterized protein {ECO:0000313|EMBL:CCB49640.1} OS=Vitis vinifera (Grape) PE=4 SV=1	PREDICTED: uncharacterized protein LOC100258330 [Vitis vinifera]
Vad18G008470.1	Molecular Function: binding (GO:0005488);;	--	[R]	General function prediction only	Putative uncharacterized protein {ECO:0000313|EMBL:CAN60646.1} OS=Vitis vinifera (Grape) PE=4 SV=1	hypothetical protein VITISV_013190 [Vitis vinifera]
Vad17G001730.1	Molecular Function: binding (GO:0005488);;	K03686|0|vvi:100249102|K03686 molecular chaperone DnaJ | (RefSeq) chaperone protein DnaJ	[O]	Posttranslational modification, protein turnover, chaperones	Putative uncharacterized protein {ECO:0000313|EMBL:CCB43296.1} OS=Vitis vinifera (Grape) PE=3 SV=1	unnamed protein product [Vitis vinifera]
Vad14G002360.1	Molecular Function: DNA binding (GO:0003677);;	--	--	--	Putative uncharacterized protein {ECO:0000313|EMBL:CCB61838.1} OS=Vitis vinifera (Grape) PE=4 SV=1	PREDICTED: uncharacterized protein LOC100254594 isoform X1 [Vitis vinifera]
Vad0G007930.1	--	--	--	--	Cytochrome c oxidase subunit 1 {ECO:0000256|RuleBase:RU000369} (Fragment) OS=Triticum urartu (Red wild einkorn) PE=3 SV=1	Ubiquinol oxidase subunit 1 [Beauveria bassiana D1-5]
Vad14G000770.1	Molecular Function: sucrose alpha-glucosidase activity (GO:0004575);; Biological Process: metabolic process (GO:0008152);; Molecular Function: glycopeptide alpha-N-acetylgalactosaminidase activity (GO:0033926);;	--	--	--	Putative neutral invertase {ECO:0000313|EMBL:CAP59645.1} OS=Vitis vinifera (Grape) PE=4 SV=1	PREDICTED: alkaline/neutral invertase CINV2 [Vitis vinifera]
Vad01G012500.1	Molecular Function: transferase activity, transferring acyl groups (GO:0016746);;	--	--	--	Uncharacterized protein {ECO:0000313|EMBL:KDP35375.1} OS=Jatropha curcas (Barbados nut) PE=4 SV=1	PREDICTED: vinorine synthase-like [Vitis vinifera]
Vad14G008380.1	Molecular Function: ATP binding (GO:0005524);; Biological Process: obsolete ATP catabolic process (GO:0006200);; Molecular Function: xenobiotic transmembrane transporting ATPase activity (GO:0008559);; Cellular Component: integral component of membrane (GO:0016021);; Biological Process: transmembrane transport (GO:0055085);;	--	[U]	Intracellular trafficking, secretion, and vesicular transport	Putative uncharacterized protein {ECO:0000313|EMBL:CCB46927.1} OS=Vitis vinifera (Grape) PE=3 SV=1	unnamed protein product [Vitis vinifera]
Vad17G008500.1	Cellular Component: peroxisome (GO:0005777);; Biological Process: polyamine catabolic process (GO:0006598);; Molecular Function: primary amine oxidase activity (GO:0008131);; Biological Process: response to wounding (GO:0009611);; Biological Process: coumarin biosynthetic process (GO:0009805);; Biological Process: cellular modified amino acid biosynthetic process (GO:0042398);; Molecular Function…	K17839|1.85251e-143|vvi:100250153|K17839 polyamine oxidase [EC:1.5.3.17 1.5.3.-] | (RefSeq) probable polyamine oxidase 4	[Q]	Secondary metabolites biosynthesis, transport and catabolism	Putative uncharacterized protein {ECO:0000313|EMBL:CBI35307.3} OS=Vitis vinifera (Grape) PE=4 SV=1	unnamed protein product [Vitis vinifera]
Vad09G000730.1	Molecular Function: DNA binding (GO:0003677);; Molecular Function: chromatin binding (GO:0003682);; Molecular Function: RNA binding (GO:0003723);; Molecular Function: structural constituent of ribosome (GO:0003735);; Cellular Component: nucleus (GO:0005634);; Biological Process: translation (GO:0006412);; Cellular Component: cytosolic small ribosomal subunit (GO:0022627);;	K02980|8.98591e-35|vvi:100262886|K02980 small subunit ribosomal protein S29e | (RefSeq) 40S ribosomal protein S29	[J]	Translation, ribosomal structure and biogenesis	40S ribosomal protein S29 {ECO:0000313|EMBL:KGN55257.1} OS=Cucumis sativus (Cucumber) PE=4 SV=1	PREDICTED: 40S ribosomal protein S29-like [Vitis vinifera]
Vad12G003830.1	--	--	--	--	Uncharacterized protein {ECO:0000313|EMBL:KGN63247.1} OS=Cucumis sativus (Cucumber) PE=4 SV=1	PREDICTED: uncharacterized protein LOC103495963 [Cucumis melo]
Vad16G006460.1	Biological Process: carbohydrate metabolic process (GO:0005975);; Molecular Function: isomerase activity (GO:0016853);; Molecular Function: carbohydrate binding (GO:0030246);;	--	--	--	Putative uncharacterized protein {ECO:0000313|EMBL:CBI31789.3} OS=Vitis vinifera (Grape) PE=4 SV=1	PREDICTED: uncharacterized protein LOC100260082 [Vitis vinifera]
Vad05G002680.1	Biological Process: defense response (GO:0006952);; Biological Process: response to biotic stimulus (GO:0009607);;	--	--	--	Putative uncharacterized protein {ECO:0000313|EMBL:CBI22932.3} OS=Vitis vinifera (Grape) PE=3 SV=1	PREDICTED: major allergen Pru av 1 [Vitis vinifera]
Vad19G006440.1	--	--	--	--	Uncharacterized protein {ECO:0000313|EMBL:EOX93522.1} OS=Theobroma cacao (Cacao) PE=4 SV=1	PREDICTED: uncharacterized protein LOC104877621 [Vitis vinifera]
Vad15G004200.1	Molecular Function: nucleic acid binding (GO:0003676);; Molecular Function: zinc ion binding (GO:0008270);;	--	--	--	Putative uncharacterized protein {ECO:0000313|EMBL:CCB43836.1} OS=Vitis vinifera (Grape) PE=4 SV=1	PREDICTED: uncharacterized protein LOC104881792 isoform X2 [Vitis vinifera]
Vad07G008610.1	Molecular Function: nucleic acid binding (GO:0003676);;	--	--	--	Putative uncharacterized protein {ECO:0000313|EMBL:CCB61011.1} OS=Vitis vinifera (Grape) PE=4 SV=1	hypothetical protein VITISV_012371 [Vitis vinifera]
Vad03G001640.1	Molecular Function: actin binding (GO:0003779);; Cellular Component: actin cytoskeleton (GO:0015629);; Biological Process: actin filament depolymerization (GO:0030042);;	K05765|2.51905e-102|vvi:100245314|K05765 cofilin | (RefSeq) actin-depolymerizing factor 5	[Z]	Cytoskeleton	Actin depolymerizing factor 5 {ECO:0000313|EMBL:EOX97703.1} OS=Theobroma cacao (Cacao) PE=4 SV=1	PREDICTED: actin-depolymerizing factor 5 [Vitis vinifera]
Vad07G017730.1	Molecular Function: nucleotide binding (GO:0000166);; Molecular Function: RNA binding (GO:0003723);; Cellular Component: nucleus (GO:0005634);; Biological Process: mRNA processing (GO:0006397);;	K13091|0|vvi:100243992|K13091 RNA-binding protein 39 | (RefSeq) RNA-binding protein 39	[K]	Transcription	Putative uncharacterized protein {ECO:0000313|EMBL:CBI21551.3} OS=Vitis vinifera (Grape) PE=4 SV=1	PREDICTED: RNA-binding protein 39 [Vitis vinifera]
Vad09G011060.1	Molecular Function: nucleic acid binding (GO:0003676);; Molecular Function: metal ion binding (GO:0046872);;	--	[R]	General function prediction only	Putative uncharacterized protein {ECO:0000313|EMBL:CBI18351.3} OS=Vitis vinifera (Grape) PE=4 SV=1	PREDICTED: zinc finger protein NUTCRACKER isoform X1 [Vitis vinifera]
Vad16G004270.1	--	--	[R]	General function prediction only	Putative uncharacterized protein {ECO:0000313|EMBL:CAN75776.1} OS=Vitis vinifera (Grape) PE=4 SV=1	hypothetical protein VITISV_027125 [Vitis vinifera]
Vad15G006880.1	Molecular Function: galactokinase activity (GO:0004335);; Molecular Function: ATP binding (GO:0005524);; Cellular Component: cytoplasm (GO:0005737);; Biological Process: phosphorylation (GO:0016310);; Biological Process: cellulose biosynthetic process (GO:0030244);; Biological Process: GDP-L-fucose salvage (GO:0042352);; Molecular Function: fucose-1-phosphate guanylyltransferase activity (GO:0047…	K05305|0|vvi:100258719|K05305 fucokinase [EC:2.7.1.52] | (RefSeq) bifunctional fucokinase/fucose pyrophosphorylase	[G]	Carbohydrate transport and metabolism	Putative uncharacterized protein {ECO:0000313|EMBL:CBI40584.3} OS=Vitis vinifera (Grape) PE=3 SV=1	PREDICTED: bifunctional fucokinase/fucose pyrophosphorylase [Vitis vinifera]
Vad18G003460.1	--	K20131|0|vvi:100252293|K20131 Rab5 GDP/GTP exchange factor | (RefSeq) vacuolar protein sorting-associated protein 9A	[U]	Intracellular trafficking, secretion, and vesicular transport	Putative uncharacterized protein {ECO:0000313|EMBL:CCB45530.1} OS=Vitis vinifera (Grape) PE=4 SV=1	PREDICTED: vacuolar protein sorting-associated protein 9A isoform X1 [Vitis vinifera]
Vad18G018570.1	Molecular Function: FMN binding (GO:0010181);; Molecular Function: oxidoreductase activity (GO:0016491);; Biological Process: oxidation-reduction process (GO:0055114);;	K05894|0|vvi:100244719|K05894 12-oxophytodienoic acid reductase [EC:1.3.1.42] | (RefSeq) putative 12-oxophytodienoate reductase 11	[CR]	--	Putative uncharacterized protein {ECO:0000313|EMBL:CAN60666.1} OS=Vitis vinifera (Grape) PE=4 SV=1	PREDICTED: putative 12-oxophytodienoate reductase 11 [Vitis vinifera]
Vad03G002680.1	--	--	--	--	Putative uncharacterized protein {ECO:0000313|EMBL:CCB60564.1} OS=Vitis vinifera (Grape) PE=4 SV=1	PREDICTED: uncharacterized protein LOC100262338 [Vitis vinifera]
Vad05G002420.1	Biological Process: carbohydrate metabolic process (GO:0005975);; Molecular Function: beta-glucosidase activity (GO:0008422);; Cellular Component: plant-type cell wall (GO:0009505);; Biological Process: seed coat development (GO:0010214);; Molecular Function: alpha-L-arabinofuranosidase activity (GO:0046556);; Cellular Component: apoplast (GO:0048046);;	--	--	--	Putative uncharacterized protein {ECO:0000313|EMBL:CCB47988.1} OS=Vitis vinifera (Grape) PE=4 SV=1	PREDICTED: putative beta-D-xylosidase [Vitis vinifera]
Vad0G008320.1	Biological Process: polysaccharide catabolic process (GO:0000272);; Molecular Function: hydrolase activity, hydrolyzing O-glycosyl compounds (GO:0004553);; Biological Process: cellular glucan metabolic process (GO:0006073);; Biological Process: carbohydrate metabolic process (GO:0044723);;	K01214|3.6519e-25|nnu:104604263|K01214 isoamylase [EC:3.2.1.68] | (RefSeq) isoamylase 3, chloroplastic	[G]	Carbohydrate transport and metabolism	Putative uncharacterized protein {ECO:0000313|EMBL:EEF21844.1} (Fragment) OS=Ricinus communis (Castor bean) PE=4 SV=1	PREDICTED: glycogen operon protein GlgX homolog [Cucumis sativus]
Vad08G011370.1	--	--	--	--	Putative uncharacterized protein {ECO:0000313|EMBL:CBI30233.3} OS=Vitis vinifera (Grape) PE=4 SV=1	PREDICTED: uncharacterized protein LOC100244314 [Vitis vinifera]
Vad03G011120.1	Molecular Function: transferase activity, transferring phosphorus-containing groups (GO:0016772);;	K04733|0|vvi:100246953|K04733 interleukin-1 receptor-associated kinase 4 [EC:2.7.11.1] | (RefSeq) cysteine-rich receptor-like protein kinase 15	--	--	Putative uncharacterized protein {ECO:0000313|EMBL:CCB48156.1} OS=Vitis vinifera (Grape) PE=4 SV=1	unnamed protein product [Vitis vinifera]
Vad09G007860.1	Molecular Function: catalytic activity (GO:0003824);;	K01530|4.22004e-41|vvi:100252404|K01530 phospholipid-translocating ATPase [EC:3.6.3.1] | (RefSeq) phospholipid-transporting ATPase 2	[R]	General function prediction only	Uncharacterized protein {ECO:0000313|EMBL:KDO40918.1} OS=Citrus sinensis (Sweet orange) PE=4 SV=1	hypothetical protein CISIN_1g001304mg [Citrus sinensis]
Vad09G011370.1	--	--	--	--	Putative uncharacterized protein {ECO:0000313|EMBL:CCB45026.1} OS=Vitis vinifera (Grape) PE=4 SV=1	PREDICTED: beta-Amyrin Synthase 2-like [Vitis vinifera]
Vad08G015700.1	--	--	[R]	General function prediction only	Putative uncharacterized protein {ECO:0000313|EMBL:CCB55116.1} OS=Vitis vinifera (Grape) PE=4 SV=1	PREDICTED: pentatricopeptide repeat-containing protein At1g79540 [Vitis vinifera]
Vad03G008870.1	--	--	[U]	Intracellular trafficking, secretion, and vesicular transport	Putative uncharacterized protein {ECO:0000313|EMBL:CCB58918.1} OS=Vitis vinifera (Grape) PE=4 SV=1	PREDICTED: HVA22-like protein a isoform X1 [Vitis vinifera]
Vad07G012090.1	Cellular Component: nucleus (GO:0005634);; Cellular Component: cytoplasm (GO:0005737);; Molecular Function: electron transfer activity (GO:0009055);; Molecular Function: protein disulfide oxidoreductase activity (GO:0015035);; Biological Process: cell redox homeostasis (GO:0045454);; Biological Process: stamen morphogenesis (GO:0048448);; Biological Process: petal formation (GO:0048451);; Biologi…	K03676|5.82219e-37|vvi:100255784|K03676 glutaredoxin 3 | (RefSeq) glutaredoxin-C3	[O]	Posttranslational modification, protein turnover, chaperones	Putative uncharacterized protein {ECO:0000313|EMBL:CCB60852.1} OS=Vitis vinifera (Grape) PE=4 SV=1	PREDICTED: glutaredoxin-C1-like [Vitis vinifera]
Vad18G013600.1	Molecular Function: nucleic acid binding (GO:0003676);; Molecular Function: ATP binding (GO:0005524);; Biological Process: defense response (GO:0006952);; Biological Process: signal transduction (GO:0007165);; Molecular Function: zinc ion binding (GO:0008270);; Biological Process: DNA integration (GO:0015074);; Molecular Function: nucleoside-triphosphatase activity (GO:0017111);; Molecular Functi…	--	--	--	Putative uncharacterized protein {ECO:0000313|EMBL:CBI25016.3} OS=Vitis vinifera (Grape) PE=4 SV=1	PREDICTED: TMV resistance protein N-like [Vitis vinifera]
Vad04G012620.1	Cellular Component: plasma membrane (GO:0005886);; Molecular Function: peptide-methionine (R)-S-oxide reductase activity (GO:0033743);; Biological Process: oxidation-reduction process (GO:0055114);;	--	--	--	Putative uncharacterized protein {ECO:0000313|EMBL:CCB49218.1} OS=Vitis vinifera (Grape) PE=4 SV=1	PREDICTED: uncharacterized protein LOC100250649 [Vitis vinifera]
Vad06G000700.1	Molecular Function: oxidoreductase activity, acting on single donors with incorporation of molecular oxygen, incorporation of two atoms of oxygen (GO:0016702);; Molecular Function: oxidoreductase activity, acting on paired donors, with incorporation or reduction of molecular oxygen, 2-oxoglutarate as one donor, and incorporation of one atom each of oxygen into both donors (GO:0016706);; Biologica…	K06892|0|vvi:100257056|K06892 feruloyl-CoA ortho-hydroxylase [EC:1.14.11.-] | (RefSeq) feruloyl CoA ortho-hydroxylase 1	[QR]	--	Putative uncharacterized protein {ECO:0000313|EMBL:CCB43794.1} OS=Vitis vinifera (Grape) PE=3 SV=1	PREDICTED: feruloyl CoA ortho-hydroxylase 1 [Vitis vinifera]
Vad08G012270.1	Molecular Function: DNA binding (GO:0003677);; Molecular Function: chromatin binding (GO:0003682);;	K09422|0|vvi:100267549|K09422 myb proto-oncogene protein, plant | (RefSeq) transcription factor RAX2	[K]	Transcription	Putative uncharacterized protein {ECO:0000313|EMBL:CBI30141.3} OS=Vitis vinifera (Grape) PE=4 SV=1	PREDICTED: transcription factor RAX2 [Vitis vinifera]
Vad01G011220.1	Molecular Function: magnesium ion binding (GO:0000287);; Molecular Function: carboxylic ester hydrolase activity (GO:0004091);; Biological Process: cellular amino acid catabolic process (GO:0009063);; Biological Process: menaquinone biosynthetic process (GO:0009234);; Molecular Function: hydro-lyase activity (GO:0016836);; Molecular Function: thiamine pyrophosphate binding (GO:0030976);; Biologic…	K14759|0|vvi:100241089|K14759 isochorismate synthase / 2-succinyl-5-enolpyruvyl-6-hydroxy-3-cyclohexene-1-carboxylate synthase / 2-succinyl-6-hydroxy-2,4-cyclohexadiene-1-carboxylate synthase / O-succinylbenzoate synthase [EC:5.4.4.2 2.2.1.9 4.2.99.20 4.2.1.113] | (RefSeq) protein PHYLLO, chloroplastic	[R]	General function prediction only	Putative uncharacterized protein {ECO:0000313|EMBL:CCB51159.1} OS=Vitis vinifera (Grape) PE=4 SV=1	PREDICTED: protein PHYLLO, chloroplastic isoform X1 [Vitis vinifera]
Vad13G010420.1	Cellular Component: integral component of membrane (GO:0016021);; Molecular Function: transmembrane transporter activity (GO:0022891);; Biological Process: transmembrane transport (GO:0055085);;	--	[R]	General function prediction only	Putative hexose transporter {ECO:0000313|EMBL:ADP37136.1} OS=Vitis vinifera (Grape) PE=3 SV=1	PREDICTED: sugar transport protein 8-like [Vitis vinifera]
Vad04G004780.1	Molecular Function: protein serine/threonine kinase activity (GO:0004674);; Molecular Function: ATP binding (GO:0005524);; Biological Process: protein phosphorylation (GO:0006468);; Cellular Component: cytoplasmic vesicle (GO:0016023);; Biological Process: cellular process (GO:0044763);; Biological Process: cellular component organization or biogenesis (GO:0071840);;	K04733|3.61788e-178|vvi:100250732|K04733 interleukin-1 receptor-associated kinase 4 [EC:2.7.11.1] | (RefSeq) lysM domain receptor-like kinase 3	--	--	Putative uncharacterized protein {ECO:0000313|EMBL:CBI21029.3} OS=Vitis vinifera (Grape) PE=3 SV=1	unnamed protein product [Vitis vinifera]
Vad01G001130.1	Cellular Component: ubiquitin ligase complex (GO:0000151);; Molecular Function: ubiquitin-protein transferase activity (GO:0004842);; Biological Process: regulation of transcription, DNA-templated (GO:0006355);; Molecular Function: transcription factor binding (GO:0008134);; Biological Process: protein ubiquitination (GO:0016567);; Biological Process: SCF-dependent proteasomal ubiquitin-dependent…	--	--	--	Putative uncharacterized protein {ECO:0000313|EMBL:CCB51034.1} OS=Vitis vinifera (Grape) PE=4 SV=1	PREDICTED: protein UNUSUAL FLORAL ORGANS [Vitis vinifera]
Vad14G008020.1	Biological Process: lipid metabolic process (GO:0006629);; Molecular Function: phosphoric diester hydrolase activity (GO:0008081);;	--	--	--	Putative uncharacterized protein {ECO:0000313|EMBL:CBI16942.3} OS=Vitis vinifera (Grape) PE=4 SV=1	unnamed protein product [Vitis vinifera]
Vad17G005880.1	Biological Process: cellular protein modification process (GO:0006464);; Molecular Function: ligase activity (GO:0016874);;	--	[H]	Coenzyme transport and metabolism	Putative uncharacterized protein {ECO:0000313|EMBL:CBI15212.3} OS=Vitis vinifera (Grape) PE=4 SV=1	PREDICTED: putative lipoate-protein ligase A isoform X1 [Vitis vinifera]
Vad19G011060.1	--	--	--	--	Putative uncharacterized protein {ECO:0000313|EMBL:CCB57193.1} OS=Vitis vinifera (Grape) PE=4 SV=1	hypothetical protein VITISV_040899 [Vitis vinifera]
Vad03G011260.1	--	--	--	--	Putative uncharacterized protein {ECO:0000313|EMBL:CBI34125.3} OS=Vitis vinifera (Grape) PE=4 SV=1	unnamed protein product [Vitis vinifera]
Vad19G009730.1	Molecular Function: DNA binding (GO:0003677);; Biological Process: regulation of transcription, DNA-templated (GO:0006355);; Biological Process: response to stress (GO:0006950);; Biological Process: multicellular organism development (GO:0007275);; Biological Process: metabolic process (GO:0044710);;	--	--	--	Putative uncharacterized protein {ECO:0000313|EMBL:CBI21755.3} OS=Vitis vinifera (Grape) PE=4 SV=1	PREDICTED: transcription factor JUNGBRUNNEN 1-like [Vitis vinifera]
Vad04G000150.1	Cellular Component: nucleus (GO:0005634);; Biological Process: regulation of transcription, DNA-templated (GO:0006355);; Biological Process: auxin-activated signaling pathway (GO:0009734);; Molecular Function: protein dimerization activity (GO:0046983);;	K14484|0|vvi:100247345|K14484 auxin-responsive protein IAA | (RefSeq) auxin-responsive protein IAA2	--	--	Auxin-responsive protein {ECO:0000256|RuleBase:RU004549} OS=Vitis vinifera (Grape) PE=3 SV=1	PREDICTED: auxin-responsive protein IAA2-like [Vitis vinifera]
Vad02G007990.1	Molecular Function: RNA binding (GO:0003723);; Molecular Function: RNA-directed DNA polymerase activity (GO:0003964);; Biological Process: RNA-dependent DNA biosynthetic process (GO:0006278);; Molecular Function: zinc ion binding (GO:0008270);;	--	--	--	Putative uncharacterized protein {ECO:0000313|EMBL:CCB57906.1} OS=Vitis vinifera (Grape) PE=4 SV=1	PREDICTED: uncharacterized protein LOC100243800 isoform X3 [Vitis vinifera]
Vad0G023220.1	Molecular Function: calcium ion binding (GO:0005509);; Molecular Function: calcium-dependent phospholipid binding (GO:0005544);;	--	[U]	Intracellular trafficking, secretion, and vesicular transport	Putative uncharacterized protein {ECO:0000313|EMBL:CBI24793.3} OS=Vitis vinifera (Grape) PE=4 SV=1	PREDICTED: annexin D3-like [Vitis vinifera]
Vad06G000350.1	Molecular Function: catalytic activity (GO:0003824);;	--	[R]	General function prediction only	Putative uncharacterized protein {ECO:0000313|EMBL:CCB43813.1} OS=Vitis vinifera (Grape) PE=4 SV=1	PREDICTED: probably inactive leucine-rich repeat receptor-like protein kinase At3g28040 [Vitis vinifera]
Vad18G019700.1	--	--	--	--	Putative uncharacterized protein {ECO:0000313|EMBL:CAN62864.1} OS=Vitis vinifera (Grape) PE=4 SV=1	PREDICTED: cysteine proteinase inhibitor 8-like [Vitis vinifera]
Vad01G000400.1	--	K17402|1.31982e-127|vvi:100264579|K17402 small subunit ribosomal protein S23 | (RefSeq) uncharacterized LOC100264579	--	--	Putative uncharacterized protein {ECO:0000313|EMBL:CBI27287.3} OS=Vitis vinifera (Grape) PE=4 SV=1	PREDICTED: uncharacterized protein LOC100264579 [Vitis vinifera]
Vad02G005610.1	--	--	--	--	NADH dehydrogenase 1 beta subcomplex subunit 8 {ECO:0000313|EMBL:EOY24384.1} OS=Theobroma cacao (Cacao) PE=4 SV=1	PREDICTED: NADH dehydrogenase [ubiquinone] 1 beta subcomplex subunit 8, mitochondrial [Vitis vinifera]
Vad10G003750.1	Molecular Function: NAD+ ADP-ribosyltransferase activity (GO:0003950);; Molecular Function: metal ion binding (GO:0046872);;	--	--	--	Putative uncharacterized protein {ECO:0000313|EMBL:CAN59868.1} OS=Vitis vinifera (Grape) PE=4 SV=1	PREDICTED: uncharacterized protein LOC100244205 [Vitis vinifera]
Vad01G003470.1	Biological Process: response to stress (GO:0006950);;	--	--	--	Putative uncharacterized protein {ECO:0000313|EMBL:CCB50904.1} OS=Vitis vinifera (Grape) PE=4 SV=1	PREDICTED: universal stress protein A-like protein [Vitis vinifera]
Vad10G009310.1	--	--	--	--	Putative uncharacterized protein {ECO:0000313|EMBL:CBI30920.3} OS=Vitis vinifera (Grape) PE=4 SV=1	PREDICTED: protein TIFY 5A [Vitis vinifera]
Vad07G008530.1	--	--	--	--	Putative uncharacterized protein {ECO:0000313|EMBL:CBI37335.3} OS=Vitis vinifera (Grape) PE=4 SV=1	unnamed protein product [Vitis vinifera]
Vad10G005340.1	Molecular Function: DNA binding (GO:0003677);; Biological Process: regulation of transcription, DNA-templated (GO:0006355);;	--	--	--	Putative uncharacterized protein {ECO:0000313|EMBL:CCB53551.1} OS=Vitis vinifera (Grape) PE=4 SV=1	PREDICTED: dof zinc finger protein DOF1.1 [Vitis vinifera]
Vad08G001050.1	Molecular Function: DNA binding (GO:0003677);; Biological Process: regulation of transcription, DNA-templated (GO:0006355);;	--	--	--	Putative uncharacterized protein {ECO:0000313|EMBL:CCB55999.1} OS=Vitis vinifera (Grape) PE=4 SV=1	PREDICTED: cyclic dof factor 3-like [Vitis vinifera]
Vad01G010440.1	Cellular Component: nucleus (GO:0005634);; Biological Process: protein targeting to membrane (GO:0006612);; Biological Process: positive regulation of flavonoid biosynthetic process (GO:0009963);; Biological Process: regulation of plant-type hypersensitive response (GO:0010363);;	--	[K]	Transcription	Putative uncharacterized protein {ECO:0000313|EMBL:CBI22302.3} OS=Vitis vinifera (Grape) PE=4 SV=1	unnamed protein product [Vitis vinifera]
Vad09G004980.1	--	--	--	--	Putative uncharacterized protein {ECO:0000313|EMBL:CAN71657.1} OS=Vitis vinifera (Grape) PE=4 SV=1	hypothetical protein VITISV_030821 [Vitis vinifera]
Vad19G010780.1	Molecular Function: organic cyclic compound binding (GO:0097159);; Molecular Function: heterocyclic compound binding (GO:1901363);;	--	--	--	Putative uncharacterized protein {ECO:0000313|EMBL:CCB56566.1} OS=Vitis vinifera (Grape) PE=4 SV=1	hypothetical protein VITISV_032228 [Vitis vinifera]
Vad13G010710.1	Biological Process: snRNA processing (GO:0016180);; Molecular Function: hydrolase activity (GO:0016787);; Cellular Component: integrator complex (GO:0032039);;	K13146|0|vvi:100262013|K13146 integrator complex subunit 9 | (RefSeq) integrator complex subunit 9 homolog	[A]	RNA processing and modification	Putative uncharacterized protein {ECO:0000313|EMBL:CBI17721.3} OS=Vitis vinifera (Grape) PE=4 SV=1	unnamed protein product [Vitis vinifera]
Vad02G003390.1	Molecular Function: glutathione transferase activity (GO:0004364);;	K00799|0|vvi:100242689|K00799 glutathione S-transferase [EC:2.5.1.18] | (RefSeq) glutathione S-transferase T1	[O]	Posttranslational modification, protein turnover, chaperones	Putative uncharacterized protein {ECO:0000313|EMBL:CBI34681.3} OS=Vitis vinifera (Grape) PE=4 SV=1	unnamed protein product [Vitis vinifera]
Vad19G004230.1	Cellular Component: vacuole (GO:0005773);;	--	--	--	Putative uncharacterized protein {ECO:0000313|EMBL:CAN64481.1} OS=Vitis vinifera (Grape) PE=4 SV=1	hypothetical protein VITISV_002814 [Vitis vinifera]
Vad18G009860.1	Cellular Component: ubiquitin ligase complex (GO:0000151);; Molecular Function: ubiquitin-protein transferase activity (GO:0004842);; Biological Process: protein ubiquitination (GO:0016567);;	--	[S]	Function unknown	Putative uncharacterized protein {ECO:0000313|EMBL:CAN75512.1} OS=Vitis vinifera (Grape) PE=4 SV=1	PREDICTED: U-box domain-containing protein 5-like isoform X2 [Vitis vinifera]
Vad14G006530.1	Biological Process: regulation of transcription, DNA-templated (GO:0006355);;	--	--	--	Putative uncharacterized protein {ECO:0000313|EMBL:CAN60180.1} OS=Vitis vinifera (Grape) PE=4 SV=1	PREDICTED: elongator complex protein 5 [Vitis vinifera]
Vad12G000800.1	Molecular Function: glutathione transferase activity (GO:0004364);;	K00799|3.42247e-153|vvi:100233043|K00799 glutathione S-transferase [EC:2.5.1.18] | (RefSeq) GST5, GST5tr; glutathione S-transferase F9	[O]	Posttranslational modification, protein turnover, chaperones	Putative uncharacterized protein {ECO:0000313|EMBL:CBI22080.3} OS=Vitis vinifera (Grape) PE=3 SV=1	PREDICTED: glutathione S-transferase F9 [Vitis vinifera]
Vad07G018100.1	Molecular Function: acidic amino acid transmembrane transporter activity (GO:0015172);; Molecular Function: neutral amino acid transmembrane transporter activity (GO:0015175);; Molecular Function: primary active transmembrane transporter activity (GO:0015399);; Biological Process: acidic amino acid transport (GO:0015800);; Biological Process: neutral amino acid transport (GO:0015804);; Cellular C…	--	[E]	Amino acid transport and metabolism	Putative uncharacterized protein {ECO:0000313|EMBL:CBI21597.3} OS=Vitis vinifera (Grape) PE=4 SV=1	unnamed protein product [Vitis vinifera]
Vad0G002690.1	--	--	--	--	2-octaprenyl-6-methoxyphenol hydroxylase, putative {ECO:0000313|EMBL:EEF23362.1} (Fragment) OS=Ricinus communis (Castor bean) PE=4 SV=1	2-octaprenyl-6-methoxyphenol hydroxylase, putative [Ricinus communis]
Vad10G013900.1	--	--	--	--	Putative uncharacterized protein {ECO:0000313|EMBL:CAN67193.1} OS=Vitis vinifera (Grape) PE=4 SV=1	PREDICTED: GEM-like protein 4 [Vitis vinifera]
Vad04G006670.1	--	--	--	--	Putative uncharacterized protein {ECO:0000313|EMBL:CBI21805.3} OS=Vitis vinifera (Grape) PE=4 SV=1	unnamed protein product [Vitis vinifera]
Vad06G012100.1	Biological Process: response to desiccation (GO:0009269);;	--	--	--	Putative uncharacterized protein {ECO:0000313|EMBL:CBI28306.3} OS=Vitis vinifera (Grape) PE=4 SV=1	PREDICTED: uncharacterized protein LOC100265664 [Vitis vinifera]
Vad07G018820.1	--	--	[S]	Function unknown	RING finger protein, putative {ECO:0000313|EMBL:EOX94105.1} (Fragment) OS=Theobroma cacao (Cacao) PE=4 SV=1	PREDICTED: uncharacterized protein LOC104879954 [Vitis vinifera]
Vad04G009250.1	Biological Process: rRNA processing (GO:0006364);; Cellular Component: chloroplast thylakoid membrane (GO:0009535);; Cellular Component: photosystem I reaction center (GO:0009538);; Biological Process: plastid organization (GO:0009657);; Cellular Component: chloroplast envelope (GO:0009941);; Biological Process: photosystem II assembly (GO:0010207);; Cellular Component: plastoglobule (GO:0010287)…	K02699|5.79724e-154|vvi:100242802|K02699 photosystem I subunit XI | (RefSeq) photosystem I reaction center subunit XI, chloroplastic	--	--	Putative uncharacterized protein {ECO:0000313|EMBL:CAN82638.1} OS=Vitis vinifera (Grape) PE=4 SV=1	PREDICTED: photosystem I reaction center subunit XI, chloroplastic [Vitis vinifera]
Vad05G000240.1	Molecular Function: metal ion binding (GO:0046872);;	--	[R]	General function prediction only	Putative uncharacterized protein {ECO:0000313|EMBL:CBI26091.3} OS=Vitis vinifera (Grape) PE=4 SV=1	PREDICTED: zinc finger CCCH domain-containing protein 34 isoform X1 [Vitis vinifera]
Vad13G004590.1	Biological Process: response to karrikin (GO:0080167);;	--	--	--	Putative uncharacterized protein {ECO:0000313|EMBL:CBI31555.3} OS=Vitis vinifera (Grape) PE=4 SV=1	PREDICTED: uncharacterized protein LOC100263234 [Vitis vinifera]
Vad06G012120.1	--	--	--	--	Putative uncharacterized protein {ECO:0000313|EMBL:CCB51647.1} OS=Vitis vinifera (Grape) PE=4 SV=1	unnamed protein product [Vitis vinifera]
Vad03G006520.1	--	--	--	--	Putative uncharacterized protein {ECO:0000313|EMBL:CCB62356.1} OS=Vitis vinifera (Grape) PE=4 SV=1	PREDICTED: LOW QUALITY PROTEIN: uncharacterized protein LOC100853810 [Vitis vinifera]
Vad03G004610.1	--	--	[S]	Function unknown	Putative uncharacterized protein {ECO:0000313|EMBL:CBI32554.3} OS=Vitis vinifera (Grape) PE=4 SV=1	unnamed protein product [Vitis vinifera]
Vad18G019170.1	Cellular Component: integral component of membrane (GO:0016021);;	K14209|0|vvi:100260163|K14209 solute carrier family 36 (proton-coupled amino acid transporter) | (RefSeq) amino acid permease 2	[E]	Amino acid transport and metabolism	Putative uncharacterized protein {ECO:0000313|EMBL:CBI39293.3} OS=Vitis vinifera (Grape) PE=4 SV=1	PREDICTED: amino acid permease 2-like [Vitis vinifera]
Vad08G004380.1	Molecular Function: DNA binding (GO:0003677);; Molecular Function: DNA-binding transcription factor activity (GO:0003700);; Cellular Component: nucleus (GO:0005634);; Biological Process: sister chromatid cohesion (GO:0007062);; Molecular Function: zinc ion binding (GO:0008270);; Biological Process: gravitropism (GO:0009630);; Biological Process: embryonic pattern specification (GO:0009880);; Biol…	--	--	--	Putative uncharacterized protein {ECO:0000313|EMBL:CCB44769.1} OS=Vitis vinifera (Grape) PE=4 SV=1	PREDICTED: B3 domain-containing transcription repressor VAL2-like isoform X1 [Vitis vinifera]
Vad14G014980.1	Molecular Function: acetyl-CoA carboxylase activity (GO:0003989);; Biological Process: fatty acid biosynthetic process (GO:0006633);; Cellular Component: acetyl-CoA carboxylase complex (GO:0009317);;	K02160|1.26634e-64|vvi:100254365|K02160 acetyl-CoA carboxylase biotin carboxyl carrier protein | (RefSeq) biotin carboxyl carrier protein of acetyl-CoA carboxylase 2, chloroplastic	--	--	Putative uncharacterized protein {ECO:0000313|EMBL:CCB47604.1} OS=Vitis vinifera (Grape) PE=4 SV=1	PREDICTED: biotin carboxyl carrier protein of acetyl-CoA carboxylase 2, chloroplastic isoform X2 [Vitis vinifera]
Vad14G014450.1	Biological Process: selenium compound metabolic process (GO:0001887);; Molecular Function: cystathionine gamma-synthase activity (GO:0003962);; Biological Process: one-carbon metabolic process (GO:0006730);; Biological Process: methionine biosynthetic process (GO:0009086);; Cellular Component: chloroplast stroma (GO:0009570);; Molecular Function: lyase activity (GO:0016829);; Molecular Function: …	K01739|0|vvi:100267880|K01739 cystathionine gamma-synthase [EC:2.5.1.48] | (RefSeq) cystathionine gamma-synthase 1, chloroplastic	[E]	Amino acid transport and metabolism	Putative uncharacterized protein {ECO:0000313|EMBL:CCB47575.1} OS=Vitis vinifera (Grape) PE=3 SV=1	PREDICTED: cystathionine gamma-synthase, chloroplastic [Vitis vinifera]
Vad18G012650.1	Molecular Function: kinase activity (GO:0016301);;	--	--	--	Putative uncharacterized protein {ECO:0000313|EMBL:CCB58944.1} OS=Vitis vinifera (Grape) PE=3 SV=1	PREDICTED: probable LRR receptor-like serine/threonine-protein kinase At3g47570 [Vitis vinifera]
Vad01G001010.1	--	--	[T]	Signal transduction mechanisms	Putative uncharacterized protein {ECO:0000313|EMBL:CCB51037.1} OS=Vitis vinifera (Grape) PE=4 SV=1	PREDICTED: putative disease resistance protein RGA1 [Vitis vinifera]
Vad13G002380.1	Molecular Function: structural constituent of ribosome (GO:0003735);; Biological Process: translation (GO:0006412);; Cellular Component: cytosolic large ribosomal subunit (GO:0022625);;	K02918|1.02219e-79|vvi:100265729|K02918 large subunit ribosomal protein L35e | (RefSeq) 60S ribosomal protein L35	[J]	Translation, ribosomal structure and biogenesis	Putative uncharacterized protein {ECO:0000313|EMBL:CCB57376.1} OS=Vitis vinifera (Grape) PE=3 SV=1	PREDICTED: 60S ribosomal protein L35 [Vitis vinifera]
Vad15G006440.1	Cellular Component: nucleus (GO:0005634);; Biological Process: lignin biosynthetic process (GO:0009809);; Biological Process: plant-type secondary cell wall biogenesis (GO:0009834);; Biological Process: anther dehiscence (GO:0009901);; Biological Process: fruit dehiscence (GO:0010047);; Cellular Component: membrane (GO:0016020);; Molecular Function: sequence-specific DNA binding (GO:0043565);; Bi…	--	--	--	Putative uncharacterized protein {ECO:0000313|EMBL:CCB61294.1} OS=Vitis vinifera (Grape) PE=4 SV=1	PREDICTED: NAC domain-containing protein 43-like [Vitis vinifera]
Vad02G000790.1	--	--	--	--	Putative uncharacterized protein {ECO:0000313|EMBL:CCB58222.1} OS=Vitis vinifera (Grape) PE=4 SV=1	PREDICTED: BTB/POZ domain-containing protein POB1-like [Vitis vinifera]
Vad17G004680.1	Biological Process: mitotic G2 phase (GO:0000085);; Molecular Function: RNA binding (GO:0003723);; Cellular Component: nucleus (GO:0005634);; Biological Process: pyrimidine ribonucleotide biosynthetic process (GO:0009220);; Biological Process: photomorphogenesis (GO:0009640);; Biological Process: protein deneddylation (GO:0010388);;	--	[R]	General function prediction only	Putative uncharacterized protein {ECO:0000313|EMBL:CBI15328.3} OS=Vitis vinifera (Grape) PE=4 SV=1	PREDICTED: pentatricopeptide repeat-containing protein PNM1, mitochondrial [Vitis vinifera]
Vad14G008990.1	Biological Process: histidine biosynthetic process (GO:0000105);; Molecular Function: phosphoribosyl-AMP cyclohydrolase activity (GO:0004635);; Molecular Function: phosphoribosyl-ATP diphosphatase activity (GO:0004636);; Biological Process: nucleotide biosynthetic process (GO:0009165);; Cellular Component: chloroplast stroma (GO:0009570);;	K11755|0|vvi:100258301|K11755 phosphoribosyl-ATP pyrophosphohydrolase / phosphoribosyl-AMP cyclohydrolase [EC:3.6.1.31 3.5.4.19] | (RefSeq) histidine biosynthesis bifunctional protein hisIE, chloroplastic	[E]	Amino acid transport and metabolism	Putative uncharacterized protein {ECO:0000313|EMBL:CBI21258.3} OS=Vitis vinifera (Grape) PE=4 SV=1	PREDICTED: histidine biosynthesis bifunctional protein hisIE, chloroplastic [Vitis vinifera]
Vad10G013140.1	Molecular Function: RNA binding (GO:0003723);; Molecular Function: RNA-directed DNA polymerase activity (GO:0003964);; Molecular Function: RNA-DNA hybrid ribonuclease activity (GO:0004523);; Biological Process: RNA-dependent DNA biosynthetic process (GO:0006278);; Biological Process: DNA integration (GO:0015074);;	--	[R]	General function prediction only	Putative uncharacterized protein {ECO:0000313|EMBL:CCB52356.1} OS=Vitis vinifera (Grape) PE=4 SV=1	hypothetical protein VITISV_034582 [Vitis vinifera]
Vad11G006720.1	Molecular Function: chitinase activity (GO:0004568);; Molecular Function: protein serine/threonine kinase activity (GO:0004674);; Molecular Function: ATP binding (GO:0005524);; Biological Process: carbohydrate metabolic process (GO:0005975);; Biological Process: chitin catabolic process (GO:0006032);; Biological Process: protein phosphorylation (GO:0006468);;	K04733|0|vvi:100258593|K04733 interleukin-1 receptor-associated kinase 4 [EC:2.7.11.1] | (RefSeq) cysteine-rich receptor-like protein kinase 19	--	--	Putative uncharacterized protein {ECO:0000313|EMBL:CCB59159.1} OS=Vitis vinifera (Grape) PE=4 SV=1	unnamed protein product [Vitis vinifera]
Vad15G001810.1	Molecular Function: nucleic acid binding (GO:0003676);; Molecular Function: catalytic activity (GO:0003824);; Biological Process: DNA metabolic process (GO:0006259);; Biological Process: multicellular organism development (GO:0007275);;	K19355|3.88586e-19|vvi:100259912|K19355 mannan endo-1,4-beta-mannosidase [EC:3.2.1.78] | (RefSeq) mannan endo-1,4-beta-mannosidase 7	--	--	Putative uncharacterized protein {ECO:0000313|EMBL:CCB57605.1} OS=Vitis vinifera (Grape) PE=4 SV=1	hypothetical protein VITISV_012340 [Vitis vinifera]
Vad08G010790.1	--	--	--	--	Putative uncharacterized protein {ECO:0000313|EMBL:CBI30286.3} OS=Vitis vinifera (Grape) PE=4 SV=1	PREDICTED: uncharacterized protein LOC100263058 [Vitis vinifera]
Vad0G001160.1	--	--	--	--	General secretion pathway protein D, putative {ECO:0000313|EMBL:EEF22367.1} (Fragment) OS=Ricinus communis (Castor bean) PE=4 SV=1	PREDICTED: putative type II secretion system protein D-like [Cucumis sativus]
Vad09G006900.1	--	--	--	--	Putative uncharacterized protein {ECO:0000313|EMBL:CCB59688.1} OS=Vitis vinifera (Grape) PE=4 SV=1	--
Vad06G005290.1	Biological Process: response to molecule of bacterial origin (GO:0002237);; Molecular Function: RNA binding (GO:0003723);; Molecular Function: protein serine/threonine kinase activity (GO:0004674);; Molecular Function: ATP binding (GO:0005524);; Biological Process: protein phosphorylation (GO:0006468);; Molecular Function: zinc ion binding (GO:0008270);; Biological Process: detection of external …	K04733|0|vvi:100241635|K04733 interleukin-1 receptor-associated kinase 4 [EC:2.7.11.1] | (RefSeq) putative serine/threonine-protein kinase	[T]	Signal transduction mechanisms	Putative uncharacterized protein {ECO:0000313|EMBL:CBI15972.3} OS=Vitis vinifera (Grape) PE=3 SV=1	PREDICTED: putative serine/threonine-protein kinase isoform X1 [Vitis vinifera]
Vad06G005630.1	Cellular Component: ubiquitin ligase complex (GO:0000151);; Molecular Function: ubiquitin-protein transferase activity (GO:0004842);; Biological Process: protein ubiquitination (GO:0016567);;	--	[S]	Function unknown	Putative uncharacterized protein {ECO:0000313|EMBL:CBI15940.3} OS=Vitis vinifera (Grape) PE=4 SV=1	unnamed protein product [Vitis vinifera]
Vad02G001520.1	Molecular Function: UDP-glucose 4-epimerase activity (GO:0003978);; Biological Process: galactose metabolic process (GO:0006012);; Biological Process: cellular metabolic process (GO:0044237);; Molecular Function: coenzyme binding (GO:0050662);;	K01784|0|vvi:100261533|K01784 UDP-glucose 4-epimerase [EC:5.1.3.2] | (RefSeq) UDP-glucose 4-epimerase GEPI48	[M]	Cell wall/membrane/envelope biogenesis	Putative uncharacterized protein {ECO:0000313|EMBL:CAN63477.1} OS=Vitis vinifera (Grape) PE=3 SV=1	PREDICTED: UDP-glucose 4-epimerase GEPI48 [Vitis vinifera]
Vad06G010800.1	--	--	--	--	Putative uncharacterized protein {ECO:0000313|EMBL:CAN78956.1} OS=Vitis vinifera (Grape) PE=4 SV=1	hypothetical protein VITISV_025690 [Vitis vinifera]
Vad0G001790.1	--	--	--	--	Predicted protein {ECO:0000313|EMBL:EDQ48168.1} OS=Physcomitrella patens subsp. patens (Moss) PE=3 SV=1	Alkanesulfonate monooxygenase [Beauveria bassiana D1-5]
Vad08G004230.1	--	--	[L]	Replication, recombination and repair	Putative uncharacterized protein {ECO:0000313|EMBL:CCB44778.1} OS=Vitis vinifera (Grape) PE=4 SV=1	PREDICTED: uncharacterized protein LOC100258499 isoform X1 [Vitis vinifera]
Vad07G008670.1	Molecular Function: transferase activity (GO:0016740);;	--	[A]	RNA processing and modification	Putative uncharacterized protein {ECO:0000313|EMBL:CBI18337.3} OS=Vitis vinifera (Grape) PE=4 SV=1	PREDICTED: ankyrin repeat and SAM domain-containing protein 6 [Vitis vinifera]
Vad06G010370.1	Biological Process: metal ion transport (GO:0030001);; Molecular Function: metal ion binding (GO:0046872);;	--	[P]	Inorganic ion transport and metabolism	Putative uncharacterized protein {ECO:0000313|EMBL:CBI17161.3} OS=Vitis vinifera (Grape) PE=4 SV=1	PREDICTED: uncharacterized protein LOC100261829 [Vitis vinifera]
Vad01G001790.1	Molecular Function: transferase activity (GO:0016740);;	--	[G]	Carbohydrate transport and metabolism	Putative uncharacterized protein {ECO:0000313|EMBL:CCB51000.1} OS=Vitis vinifera (Grape) PE=4 SV=1	PREDICTED: uncharacterized protein At4g19900 [Vitis vinifera]
Vad04G007910.1	--	--	[K]	Transcription	Putative uncharacterized protein {ECO:0000313|EMBL:CCB51131.1} OS=Vitis vinifera (Grape) PE=4 SV=1	PREDICTED: uncharacterized protein LOC100242814 [Vitis vinifera]
Vad07G003530.1	Biological Process: carbohydrate metabolic process (GO:0005975);; Molecular Function: beta-glucosidase activity (GO:0008422);;	K01188|0|vvi:100257320|K01188 beta-glucosidase [EC:3.2.1.21] | (RefSeq) beta-glucosidase 11-like	[G]	Carbohydrate transport and metabolism	Putative uncharacterized protein {ECO:0000313|EMBL:CBI36854.3} OS=Vitis vinifera (Grape) PE=3 SV=1	unnamed protein product [Vitis vinifera]
Vad05G012650.1	Biological Process: regulation of transcription, DNA-templated (GO:0006355);; Cellular Component: chloroplast stroma (GO:0009570);; Biological Process: chloroplast organization (GO:0009658);;	--	--	--	Putative uncharacterized protein {ECO:0000313|EMBL:CBI24762.3} OS=Vitis vinifera (Grape) PE=4 SV=1	PREDICTED: uncharacterized protein LOC100245762 [Vitis vinifera]
Vad15G005610.1	Molecular Function: ATP binding (GO:0005524);; Cellular Component: nucleus (GO:0005634);; Biological Process: regulation of transcription, DNA-templated (GO:0006355);; Molecular Function: hydrolase activity, acting on acid anhydrides, in phosphorus-containing anhydrides (GO:0016818);; Biological Process: leaf development (GO:0048366);;	--	--	--	Putative uncharacterized protein {ECO:0000313|EMBL:CAN65448.1} OS=Vitis vinifera (Grape) PE=4 SV=1	PREDICTED: growth-regulating factor 9 isoform X1 [Vitis vinifera]
Vad11G000280.1	--	K07052|0|vvi:100249222|K07052 uncharacterized protein | (RefSeq) uncharacterized LOC100249222	--	--	Putative uncharacterized protein {ECO:0000313|EMBL:CCB51369.1} OS=Vitis vinifera (Grape) PE=4 SV=1	PREDICTED: uncharacterized protein LOC100249222 isoform X1 [Vitis vinifera]
Vad0G015380.1	Biological Process: response to reactive oxygen species (GO:0000302);; Molecular Function: serine-type endopeptidase activity (GO:0004252);; Biological Process: proteolysis (GO:0006508);; Cellular Component: chloroplast stroma (GO:0009570);; Biological Process: systemic acquired resistance (GO:0009627);; Cellular Component: chloroplast envelope (GO:0009941);; Biological Process: regulation of gen…	K01358|2.09316e-55|vvi:100855178|K01358 ATP-dependent Clp protease, protease subunit [EC:3.4.21.92] | (RefSeq) ATP-dependent Clp protease proteolytic subunit-related protein 4, chloroplastic	[O]	Posttranslational modification, protein turnover, chaperones	ATP-dependent Clp protease proteolytic subunit {ECO:0000256|RuleBase:RU003567} OS=Vitis vinifera (Grape) PE=3 SV=1	unnamed protein product [Vitis vinifera]
Vad06G006740.1	Biological Process: negative regulation of stomatal complex development (GO:2000122);;	--	--	--	Putative uncharacterized protein {ECO:0000313|EMBL:CBI15833.3} OS=Vitis vinifera (Grape) PE=4 SV=1	PREDICTED: EPIDERMAL PATTERNING FACTOR-like protein 6 [Vitis vinifera]
Vad01G000570.1	Molecular Function: structural constituent of ribosome (GO:0003735);; Cellular Component: cell wall (GO:0005618);; Cellular Component: nucleolus (GO:0005730);; Cellular Component: vacuole (GO:0005773);; Biological Process: translation (GO:0006412);; Cellular Component: membrane (GO:0016020);; Cellular Component: cytosolic small ribosomal subunit (GO:0022627);;	K02966|8.99515e-105|vvi:100266271|K02966 small subunit ribosomal protein S19e | (RefSeq) 40S ribosomal protein S19-1	[J]	Translation, ribosomal structure and biogenesis	Putative uncharacterized protein {ECO:0000313|EMBL:CAN70140.1} OS=Vitis vinifera (Grape) PE=4 SV=1	PREDICTED: 40S ribosomal protein S19-1 [Vitis vinifera]
Vad18G007730.1	Molecular Function: RNA binding (GO:0003723);; Molecular Function: transferase activity, transferring acyl groups other than amino-acyl groups (GO:0016747);;	--	--	--	Putative uncharacterized protein {ECO:0000313|EMBL:CCB45819.1} OS=Vitis vinifera (Grape) PE=4 SV=1	PREDICTED: uncharacterized acetyltransferase At3g50280-like [Vitis vinifera]
Vad13G013130.1	Molecular Function: DNA-binding transcription factor activity (GO:0003700);; Biological Process: regulation of transcription, DNA-templated (GO:0006355);;	--	[K]	Transcription	Putative uncharacterized protein {ECO:0000313|EMBL:CAN81128.1} OS=Vitis vinifera (Grape) PE=4 SV=1	PREDICTED: trihelix transcription factor ASIL1-like [Vitis vinifera]
Vad10G012630.1	Molecular Function: zinc ion transmembrane transporter activity (GO:0005385);; Cellular Component: integral component of membrane (GO:0016021);; Molecular Function: 2-alkenal reductase [NAD(P)] activity (GO:0032440);; Biological Process: oxidation-reduction process (GO:0055114);; Biological Process: zinc ion transmembrane transport (GO:0071577);;	K14709|0|vvi:100240875|K14709 solute carrier family 39 (zinc transporter), member 1/2/3 | (RefSeq) probable zinc transporter 10	[P]	Inorganic ion transport and metabolism	Putative uncharacterized protein {ECO:0000313|EMBL:CAN72233.1} OS=Vitis vinifera (Grape) PE=4 SV=1	PREDICTED: probable zinc transporter 10 [Vitis vinifera]
Vad02G009050.1	Molecular Function: 2'-hydroxyisoflavone reductase activity (GO:0047526);; Biological Process: oxidation-reduction process (GO:0055114);;	--	--	--	Putative uncharacterized protein {ECO:0000313|EMBL:CAN73024.1} OS=Vitis vinifera (Grape) PE=4 SV=1	hypothetical protein VITISV_041007 [Vitis vinifera]
Vad06G001750.1	Cellular Component: plasma membrane (GO:0005886);; Cellular Component: integral component of membrane (GO:0016021);;	--	--	--	CASP-like protein {ECO:0000256|RuleBase:RU361233} OS=Vitis vinifera (Grape) PE=3 SV=1	PREDICTED: CASP-like protein 5A2 [Vitis vinifera]
Vad15G007350.1	Molecular Function: diacylglycerol O-acyltransferase activity (GO:0004144);; Biological Process: glycerolipid biosynthetic process (GO:0045017);;	--	--	--	Putative uncharacterized protein {ECO:0000313|EMBL:CCB62535.1} OS=Vitis vinifera (Grape) PE=4 SV=1	unnamed protein product [Vitis vinifera]
Vad13G004410.1	Biological Process: metabolic process (GO:0008152);; Molecular Function: transferase activity, transferring hexosyl groups (GO:0016758);;	--	[GC]	--	Putative uncharacterized protein {ECO:0000313|EMBL:CCB56265.1} OS=Vitis vinifera (Grape) PE=4 SV=1	PREDICTED: 7-deoxyloganetic acid glucosyltransferase [Vitis vinifera]
Vad05G004200.1	Biological Process: MAPK cascade (GO:0000165);; Molecular Function: nucleotide binding (GO:0000166);; Molecular Function: protein serine/threonine kinase activity (GO:0004674);; Biological Process: protein phosphorylation (GO:0006468);;	--	[T]	Signal transduction mechanisms	Putative uncharacterized protein {ECO:0000313|EMBL:CCB48513.1} OS=Vitis vinifera (Grape) PE=4 SV=1	PREDICTED: serine/threonine-protein kinase BLUS1 [Vitis vinifera]
Vad05G003640.1	Cellular Component: nuclear pore (GO:0005643);; Biological Process: transport (GO:0006810);;	K18187|4.73202e-47|vvi:100257935|K18187 protein PET100, fungi type | (RefSeq) uncharacterized LOC100257935	--	--	Putative uncharacterized protein {ECO:0000313|EMBL:CBI26344.3} OS=Vitis vinifera (Grape) PE=4 SV=1	PREDICTED: uncharacterized protein LOC100257935 [Vitis vinifera]
Vad0G009110.1	--	--	--	--	Uncharacterized protein {ECO:0000313|EMBL:EKX42029.1} OS=Guillardia theta CCMP2712 PE=4 SV=1	hypothetical protein GUITHDRAFT_111884 [Guillardia theta CCMP2712]
Vad03G009070.1	Molecular Function: RNA binding (GO:0003723);; Molecular Function: RNA-directed DNA polymerase activity (GO:0003964);; Molecular Function: protein serine/threonine kinase activity (GO:0004674);; Molecular Function: ATP binding (GO:0005524);; Cellular Component: nucleus (GO:0005634);; Biological Process: RNA-dependent DNA biosynthetic process (GO:0006278);; Biological Process: protein phosphorylat…	K04733|0|vvi:100245063|K04733 interleukin-1 receptor-associated kinase 4 [EC:2.7.11.1] | (RefSeq) L-type lectin-domain containing receptor kinase IX.1	--	--	Putative uncharacterized protein {ECO:0000313|EMBL:CAN80079.1} OS=Vitis vinifera (Grape) PE=3 SV=1	hypothetical protein VITISV_041810 [Vitis vinifera]
Vad16G003730.1	Molecular Function: nucleic acid binding (GO:0003676);; Molecular Function: DNA-binding transcription factor activity (GO:0003700);; Biological Process: regulation of transcription, DNA-templated (GO:0006355);; Molecular Function: zinc ion binding (GO:0008270);;	--	--	--	Putative uncharacterized protein {ECO:0000313|EMBL:CCB50242.1} OS=Vitis vinifera (Grape) PE=4 SV=1	hypothetical protein VITISV_024906 [Vitis vinifera]
Vad06G012190.1	Molecular Function: superoxide dismutase activity (GO:0004784);; Cellular Component: extracellular region (GO:0005576);; Molecular Function: manganese ion binding (GO:0030145);; Molecular Function: nutrient reservoir activity (GO:0045735);; Biological Process: oxidation-reduction process (GO:0055114);;	--	--	--	Putative uncharacterized protein {ECO:0000313|EMBL:CCB51643.1} OS=Vitis vinifera (Grape) PE=4 SV=1	PREDICTED: putative germin-like protein 9-2 [Vitis vinifera]
Vad04G005450.1	Molecular Function: acid phosphatase activity (GO:0003993);; Biological Process: proteolysis (GO:0006508);; Molecular Function: metallopeptidase activity (GO:0008237);; Molecular Function: zinc ion binding (GO:0008270);;	K08776|1.79123e-43|vvi:100244572|K08776 puromycin-sensitive aminopeptidase [EC:3.4.11.-] | (RefSeq) aminopeptidase M1	[EO]	--	Putative uncharacterized protein {ECO:0000313|EMBL:CBI21090.3} OS=Vitis vinifera (Grape) PE=4 SV=1	unnamed protein product [Vitis vinifera]
Vad03G000390.1	Molecular Function: hydrolase activity, hydrolyzing O-glycosyl compounds (GO:0004553);; Biological Process: carbohydrate metabolic process (GO:0005975);;	K01179|0|vvi:100260645|K01179 endoglucanase [EC:3.2.1.4] | (RefSeq) endoglucanase 24	--	--	Endoglucanase {ECO:0000256|RuleBase:RU361166} OS=Vitis vinifera (Grape) PE=3 SV=1	PREDICTED: endoglucanase 24 [Vitis vinifera]
Vad01G000330.1	Biological Process: metabolic process (GO:0008152);; Molecular Function: kinase activity (GO:0016301);;	--	--	--	Putative uncharacterized protein {ECO:0000313|EMBL:CCB51082.1} OS=Vitis vinifera (Grape) PE=3 SV=1	PREDICTED: LRR receptor-like serine/threonine-protein kinase RPK2 [Vitis vinifera]
Vad18G004290.1	Biological Process: cell redox homeostasis (GO:0045454);;	--	[S]	Function unknown	Putative uncharacterized protein {ECO:0000313|EMBL:CCB45571.1} OS=Vitis vinifera (Grape) PE=4 SV=1	PREDICTED: 5&apos;-adenylylsulfate reductase-like 4 [Vitis vinifera]
Vad06G008750.1	--	K18158|0|vvi:100242629|K18158 nuclear control of ATPase protein 2 | (RefSeq) protein DGS1, mitochondrial	--	--	Putative uncharacterized protein {ECO:0000313|EMBL:CCB49116.1} OS=Vitis vinifera (Grape) PE=4 SV=1	PREDICTED: uncharacterized protein LOC100242629 isoform X1 [Vitis vinifera]
Vad17G000470.1	Cellular Component: plasma membrane (GO:0005886);; Cellular Component: integral component of membrane (GO:0016021);;	--	--	--	CASP-like protein {ECO:0000256|RuleBase:RU361233} OS=Prunus persica (Peach) PE=3 SV=1	RecName: Full=CASP-like protein 1F1; Short=VvCASPL1F1 [Vitis vinifera]
Vad18G016790.1	Molecular Function: magnesium ion binding (GO:0000287);; Biological Process: metabolic process (GO:0008152);; Molecular Function: terpene synthase activity (GO:0010333);;	--	--	--	(E)-alpha-bergamotene synthase {ECO:0000313|EMBL:ADR74195.2} OS=Vitis vinifera (Grape) PE=2 SV=2	valencene synthase-like [Vitis vinifera]
Vad14G004270.1	Molecular Function: ATP binding (GO:0005524);; Biological Process: defense response (GO:0006952);; Molecular Function: nucleoside-triphosphatase activity (GO:0017111);; Molecular Function: ADP binding (GO:0043531);;	--	[T]	Signal transduction mechanisms	Putative uncharacterized protein {ECO:0000313|EMBL:CAN80585.1} OS=Vitis vinifera (Grape) PE=4 SV=1	PREDICTED: probable disease resistance protein At4g27220 isoform X4 [Vitis vinifera]
Vad07G003290.1	Biological Process: response to heat (GO:0009408);; Cellular Component: intracellular part (GO:0044424);; Biological Process: biological_process (GO:0044699);;	K19765|2.19787e-39|vvi:100258937|K19765 heat shock factor-binding protein 1 | (RefSeq) heat shock factor-binding protein 1	[KO]	--	Putative uncharacterized protein {ECO:0000313|EMBL:CCB59946.1} OS=Vitis vinifera (Grape) PE=4 SV=1	PREDICTED: heat shock factor-binding protein 1-like [Vitis vinifera]
Vad07G016800.1	Molecular Function: copper ion binding (GO:0005507);; Cellular Component: extracellular region (GO:0005576);; Molecular Function: L-ascorbate oxidase activity (GO:0008447);; Biological Process: oxidation-reduction process (GO:0055114);;	--	[Q]	Secondary metabolites biosynthesis, transport and catabolism	Putative uncharacterized protein {ECO:0000313|EMBL:CBI21457.3} OS=Vitis vinifera (Grape) PE=4 SV=1	PREDICTED: L-ascorbate oxidase [Vitis vinifera]
Vad06G003600.1	Biological Process: cell adhesion (GO:0007155);; Biological Process: response to salt stress (GO:0009651);; Biological Process: multidimensional cell growth (GO:0009825);; Cellular Component: external side of plasma membrane (GO:0009897);; Molecular Function: polysaccharide binding (GO:0030247);; Cellular Component: anchored component of plasma membrane (GO:0046658);;	--	--	--	Putative uncharacterized protein {ECO:0000313|EMBL:CCB43574.1} OS=Vitis vinifera (Grape) PE=4 SV=1	PREDICTED: fasciclin-like arabinogalactan protein 4 [Vitis vinifera]
Vad07G001070.1	--	--	--	--	Putative uncharacterized protein {ECO:0000313|EMBL:CBI28726.3} OS=Vitis vinifera (Grape) PE=4 SV=1	PREDICTED: uncharacterized protein LOC100852813 [Vitis vinifera]
Vad11G000700.1	Molecular Function: copper ion transmembrane transporter activity (GO:0005375);; Cellular Component: vacuole (GO:0005773);; Cellular Component: integral component of membrane (GO:0016021);; Biological Process: copper ion transmembrane transport (GO:0035434);;	K14686|1.25994e-103|vvi:100247516|K14686 solute carrier family 31 (copper transporter), member 1 | (RefSeq) CTR1; copper transporter	[P]	Inorganic ion transport and metabolism	Putative uncharacterized protein {ECO:0000313|EMBL:CBI27797.3} OS=Vitis vinifera (Grape) PE=4 SV=1	unnamed protein product [Vitis vinifera]
Vad14G000640.1	Molecular Function: GTP binding (GO:0005525);; Cellular Component: vacuole (GO:0005773);; Cellular Component: Golgi-associated vesicle (GO:0005798);; Biological Process: small GTPase mediated signal transduction (GO:0007264);; Cellular Component: plastid (GO:0009536);;	K07937|2.23704e-130|vvi:100242677|K07937 ADP-ribosylation factor 1 | (RefSeq) ADP-ribosylation factor	[U]	Intracellular trafficking, secretion, and vesicular transport	Putative uncharacterized protein {ECO:0000313|EMBL:CCB61940.1} OS=Vitis vinifera (Grape) PE=4 SV=1	unnamed protein product [Vitis vinifera]
Vad12G008020.1	--	--	--	--	Uncharacterized protein {ECO:0000313|EMBL:KDP45162.1} OS=Jatropha curcas (Barbados nut) PE=4 SV=1	PREDICTED: uncharacterized protein LOC100254633 isoform X1 [Vitis vinifera]
Vad12G004580.1	--	--	--	--	Putative uncharacterized protein {ECO:0000313|EMBL:CCB51995.1} OS=Vitis vinifera (Grape) PE=4 SV=1	PREDICTED: uncharacterized protein LOC100253430 [Vitis vinifera]
Vad02G004760.1	Biological Process: photosystem II assembly (GO:0010207);;	--	--	--	Putative uncharacterized protein {ECO:0000313|EMBL:CBI34804.3} OS=Vitis vinifera (Grape) PE=4 SV=1	PREDICTED: uncharacterized protein ycf49 isoform X1 [Vitis vinifera]
Vad07G005600.1	Cellular Component: integral component of membrane (GO:0016021);; Molecular Function: cellulose synthase (UDP-forming) activity (GO:0016760);; Biological Process: cellulose biosynthetic process (GO:0030244);;	--	--	--	Putative uncharacterized protein {ECO:0000313|EMBL:CCB60068.1} OS=Vitis vinifera (Grape) PE=4 SV=1	hypothetical protein VITISV_029179 [Vitis vinifera]
Vad14G012510.1	--	--	--	--	Putative uncharacterized protein {ECO:0000313|EMBL:CCB58531.1} OS=Vitis vinifera (Grape) PE=4 SV=1	PREDICTED: uncharacterized protein LOC100266244 isoform X1 [Vitis vinifera]
Vad10G007210.1	Molecular Function: nucleotide binding (GO:0000166);; Cellular Component: membrane (GO:0016020);; Molecular Function: kinase activity (GO:0016301);; Biological Process: phosphorylation (GO:0016310);;	--	--	--	Uncharacterized protein {ECO:0000313|EMBL:KDP21105.1} OS=Jatropha curcas (Barbados nut) PE=4 SV=1	PREDICTED: probable LRR receptor-like serine/threonine-protein kinase MRH1 [Vitis vinifera]
Vad0G019410.1	Molecular Function: obsolete signal transducer activity (GO:0004871);; Biological Process: signal transduction (GO:0007165);; Biological Process: cellular metabolic process (GO:0044237);;	K12121|3.16434e-08|rcu:8258820|K12121 phytochrome B | (RefSeq) phytochrome B	--	--	Diatom PHytochrome 1 {ECO:0000313|EMBL:EEC49760.1} OS=Phaeodactylum tricornutum (strain CCAP 1055/1) PE=4 SV=1	hypothetical protein NCU05790 [Neurospora crassa OR74A]
Vad18G021950.1	Molecular Function: ATP binding (GO:0005524);; Biological Process: obsolete ATP catabolic process (GO:0006200);; Biological Process: tRNA metabolic process (GO:0006399);; Molecular Function: ATP-dependent helicase activity (GO:0008026);; Cellular Component: chloroplast (GO:0009507);; Biological Process: chloroplast organization (GO:0009658);; Molecular Function: large ribosomal subunit rRNA bindi…	--	[A]	RNA processing and modification	Putative uncharacterized protein {ECO:0000313|EMBL:CCB52341.1} OS=Vitis vinifera (Grape) PE=4 SV=1	PREDICTED: DEAD-box ATP-dependent RNA helicase 39 [Vitis vinifera]
Vad06G011470.1	Cellular Component: nucleus (GO:0005634);; Biological Process: regulation of transcription, DNA-templated (GO:0006355);; Molecular Function: NAD-dependent histone deacetylase activity (H3-K14 specific) (GO:0032041);; Molecular Function: NAD-dependent histone deacetylase activity (H3-K9 specific) (GO:0046969);; Molecular Function: NAD-dependent histone deacetylase activity (H4-K16 specific) (GO:00…	K06067|0|vvi:100248276|K06067 histone deacetylase 1/2 [EC:3.5.1.98] | (RefSeq) histone deacetylase 9	[B]	Chromatin structure and dynamics	Histone deacetylase {ECO:0000256|PIRNR:PIRNR037913} OS=Vitis vinifera (Grape) PE=3 SV=1	PREDICTED: histone deacetylase 9 [Vitis vinifera]
Vad08G006500.1	Biological Process: N-terminal protein myristoylation (GO:0006499);; Biological Process: amino acid transport (GO:0006865);; Biological Process: response to chitin (GO:0010200);;	--	--	--	Putative uncharacterized protein {ECO:0000313|EMBL:CCB57055.1} OS=Vitis vinifera (Grape) PE=4 SV=1	PREDICTED: cell number regulator 8 [Vitis vinifera]
Vad04G011940.1	Molecular Function: protein dimerization activity (GO:0046983);;	--	--	--	Putative uncharacterized protein {ECO:0000313|EMBL:CBI17374.3} OS=Vitis vinifera (Grape) PE=4 SV=1	PREDICTED: transcription factor bHLH121 [Vitis vinifera]
Vad12G007420.1	Molecular Function: glucose-6-phosphate dehydrogenase activity (GO:0004345);; Biological Process: pentose-phosphate shunt (GO:0006098);; Molecular Function: NADP binding (GO:0050661);;	K00036|0|vvi:100264918|K00036 glucose-6-phosphate 1-dehydrogenase [EC:1.1.1.49 1.1.1.363] | (RefSeq) glucose-6-phosphate 1-dehydrogenase, chloroplastic	[G]	Carbohydrate transport and metabolism	Glucose-6-phosphate 1-dehydrogenase {ECO:0000256|RuleBase:RU000497} OS=Vitis vinifera (Grape) PE=3 SV=1	unnamed protein product [Vitis vinifera]
Vad04G006800.1	Molecular Function: ionotropic glutamate receptor activity (GO:0004970);; Molecular Function: extracellularly glutamate-gated ion channel activity (GO:0005234);; Biological Process: ion transport (GO:0006811);; Cellular Component: integral component of membrane (GO:0016021);; Biological Process: ionotropic glutamate receptor signaling pathway (GO:0035235);;	--	[PET]	--	Putative uncharacterized protein {ECO:0000313|EMBL:CBI23996.3} OS=Vitis vinifera (Grape) PE=4 SV=1	PREDICTED: glutamate receptor 2.9-like [Vitis vinifera]
Vad14G012900.1	Molecular Function: translation elongation factor activity (GO:0003746);; Molecular Function: GTPase activity (GO:0003924);; Molecular Function: ATP binding (GO:0005524);; Molecular Function: GTP binding (GO:0005525);; Cellular Component: cell wall (GO:0005618);; Cellular Component: intracellular (GO:0005622);; Biological Process: obsolete GTP catabolic process (GO:0006184);; Biological Process: …	K02358|5.01531e-32|cam:105851533|K02358 elongation factor Tu | (RefSeq) elongation factor Tu, mitochondrial-like	[J]	Translation, ribosomal structure and biogenesis	Putative uncharacterized protein {ECO:0000313|EMBL:CCB42942.1} OS=Vitis vinifera (Grape) PE=4 SV=1	GTP-binding elongation factor Tu family protein [Medicago truncatula]
Vad06G004190.1	Cellular Component: transcription factor TFIIA complex (GO:0005672);; Biological Process: transcription initiation from RNA polymerase II promoter (GO:0006367);;	K03122|0|vvi:100241598|K03122 transcription initiation factor TFIIA large subunit | (RefSeq) transcription initiation factor IIA subunit 1	[K]	Transcription	Putative uncharacterized protein {ECO:0000313|EMBL:CBI16085.3} OS=Vitis vinifera (Grape) PE=4 SV=1	PREDICTED: transcription initiation factor IIA subunit 1 [Vitis vinifera]
Vad07G014800.1	--	K07297|0|vvi:100264855|K07297 adiponectin receptor | (RefSeq) heptahelical transmembrane protein 4	[RT]	--	Putative uncharacterized protein {ECO:0000313|EMBL:CCB50140.1} OS=Vitis vinifera (Grape) PE=4 SV=1	PREDICTED: heptahelical transmembrane protein 4-like [Vitis vinifera]
Vad04G001700.1	Cellular Component: chloroplast thylakoid membrane (GO:0009535);; Cellular Component: chloroplast thylakoid lumen (GO:0009543);;	--	--	--	Putative uncharacterized protein {ECO:0000313|EMBL:CBI20723.3} OS=Vitis vinifera (Grape) PE=4 SV=1	PREDICTED: uncharacterized protein LOC100249293 [Vitis vinifera]
Vad14G005010.1	Molecular Function: ATP binding (GO:0005524);; Biological Process: defense response (GO:0006952);; Molecular Function: nucleoside-triphosphatase activity (GO:0017111);; Molecular Function: ADP binding (GO:0043531);;	--	[T]	Signal transduction mechanisms	Putative uncharacterized protein {ECO:0000313|EMBL:CAN62857.1} OS=Vitis vinifera (Grape) PE=4 SV=1	hypothetical protein VITISV_013427 [Vitis vinifera]
Vad12G012430.1	Cellular Component: cytoplasm (GO:0005737);; Biological Process: fatty acid biosynthetic process (GO:0006633);; Molecular Function: 3-hydroxydecanoyl-[acyl-carrier-protein] dehydratase activity (GO:0008693);;	K02372|5.61729e-151|vvi:100264168|K02372 3-hydroxyacyl-[acyl-carrier-protein] dehydratase [EC:4.2.1.59] | (RefSeq) 3-hydroxyacyl-[acyl-carrier-protein] dehydratase FabZ	--	--	Putative uncharacterized protein {ECO:0000313|EMBL:CBI20064.3} OS=Vitis vinifera (Grape) PE=3 SV=1	PREDICTED: uncharacterized protein LOC100264168 [Vitis vinifera]
Vad09G004550.1	Molecular Function: oxidoreductase activity, acting on paired donors, with incorporation or reduction of molecular oxygen, 2-oxoglutarate as one donor, and incorporation of one atom each of oxygen into both donors (GO:0016706);; Biological Process: oxidation-reduction process (GO:0055114);;	--	[QR]	--	Putative uncharacterized protein {ECO:0000313|EMBL:CBI36205.3} OS=Vitis vinifera (Grape) PE=3 SV=1	unnamed protein product [Vitis vinifera]
Vad07G005060.1	Cellular Component: cell wall (GO:0005618);; Molecular Function: pectinesterase activity (GO:0030599);; Biological Process: cell wall modification (GO:0042545);; Molecular Function: aspartyl esterase activity (GO:0045330);;	K01051|0|vvi:100265859|K01051 pectinesterase [EC:3.1.1.11] | (RefSeq) probable pectinesterase 53	--	--	Pectinesterase {ECO:0000256|RuleBase:RU000589} OS=Vitis vinifera (Grape) PE=3 SV=1	PREDICTED: probable pectinesterase 53 [Vitis vinifera]
Vad19G000540.1	Molecular Function: uroporphyrinogen decarboxylase activity (GO:0004853);; Biological Process: protoporphyrinogen IX biosynthetic process (GO:0006782);;	--	--	--	Uroporphyrinogen decarboxylase {ECO:0000256|RuleBase:RU000554} OS=Vitis vinifera (Grape) PE=3 SV=1	unnamed protein product [Vitis vinifera]
Vad08G009090.1	--	--	[TO]	--	Putative uncharacterized protein {ECO:0000313|EMBL:CBI30436.3} OS=Vitis vinifera (Grape) PE=4 SV=1	PREDICTED: OTU domain-containing protein At3g57810 [Vitis vinifera]
Vad15G007910.1	Molecular Function: 3'-5'-exoribonuclease activity (GO:0000175);; Molecular Function: RNA binding (GO:0003723);; Cellular Component: cytosol (GO:0005829);; Biological Process: RNA processing (GO:0006396);; Molecular Function: tRNA nucleotidyltransferase activity (GO:0009022);;	K11600|3.04596e-177|vvi:100265488|K11600 exosome complex component RRP41 | (RefSeq) exosome complex component RRP41 homolog	[J]	Translation, ribosomal structure and biogenesis	Putative uncharacterized protein {ECO:0000313|EMBL:CAN81194.1} OS=Vitis vinifera (Grape) PE=4 SV=1	PREDICTED: exosome complex component RRP41 [Vitis vinifera]
Vad15G000890.1	Molecular Function: lactoylglutathione lyase activity (GO:0004462);; Molecular Function: transferase activity (GO:0016740);;	K00799|2.37298e-159|vvi:100245369|K00799 glutathione S-transferase [EC:2.5.1.18] | (RefSeq) probable glutathione S-transferase	[O]	Posttranslational modification, protein turnover, chaperones	Putative uncharacterized protein {ECO:0000313|EMBL:CCB62134.1} OS=Vitis vinifera (Grape) PE=3 SV=1	PREDICTED: probable glutathione S-transferase isoform X2 [Vitis vinifera]
Vad07G010990.1	Cellular Component: integral component of membrane (GO:0016021);; Biological Process: brassinosteroid biosynthetic process (GO:0016132);;	--	[T]	Signal transduction mechanisms	Putative uncharacterized protein {ECO:0000313|EMBL:CCB60939.1} OS=Vitis vinifera (Grape) PE=4 SV=1	PREDICTED: cytochrome b561 and DOMON domain-containing protein At3g07570-like [Vitis vinifera]
Vad02G007860.1	Biological Process: aromatic amino acid family biosynthetic process (GO:0009073);; Biological Process: embryo development ending in seed dormancy (GO:0009793);; Biological Process: stomatal complex morphogenesis (GO:0010103);; Biological Process: iron-sulfur cluster assembly (GO:0016226);; Biological Process: protein targeting to chloroplast (GO:0045036);;	--	[R]	General function prediction only	Putative uncharacterized protein {ECO:0000313|EMBL:CCB57915.1} OS=Vitis vinifera (Grape) PE=4 SV=1	PREDICTED: pentatricopeptide repeat-containing protein At5g46580, chloroplastic [Vitis vinifera]
Vad17G001810.1	--	--	[R]	General function prediction only	Putative uncharacterized protein {ECO:0000313|EMBL:CCB43292.1} OS=Vitis vinifera (Grape) PE=4 SV=1	PREDICTED: uncharacterized protein LOC100262718 isoform X2 [Vitis vinifera]
Vad19G001010.1	Molecular Function: extracellular ligand-gated ion channel activity (GO:0005230);; Biological Process: transport (GO:0006810);; Cellular Component: membrane (GO:0016020);; Biological Process: biological_process (GO:0044699);;	--	[PET]	--	Putative uncharacterized protein {ECO:0000313|EMBL:CCB46286.1} OS=Vitis vinifera (Grape) PE=4 SV=1	PREDICTED: glutamate receptor 1.1-like [Vitis vinifera]
Vad07G012210.1	Molecular Function: hydrolase activity, hydrolyzing O-glycosyl compounds (GO:0004553);; Biological Process: carbohydrate metabolic process (GO:0005975);; Molecular Function: protein binding, bridging (GO:0030674);; Molecular Function: actin filament binding (GO:0051015);;	--	--	--	Putative uncharacterized protein {ECO:0000313|EMBL:CCB45345.1} OS=Vitis vinifera (Grape) PE=3 SV=1	PREDICTED: glucan 1,3-beta-glucosidase A [Vitis vinifera]
Vad16G006650.1	Cellular Component: plasma membrane (GO:0005886);; Biological Process: transport (GO:0006810);; Biological Process: cell-cell signaling (GO:0007267);; Molecular Function: galacturonate binding (GO:0048032);;	--	--	--	Putative uncharacterized protein {ECO:0000313|EMBL:CAN73187.1} OS=Vitis vinifera (Grape) PE=4 SV=1	PREDICTED: remorin [Vitis vinifera]
Vad04G007700.1	--	--	--	--	Putative uncharacterized protein {ECO:0000313|EMBL:CCB57993.1} OS=Vitis vinifera (Grape) PE=4 SV=1	hypothetical protein VITISV_024101 [Vitis vinifera]
Vad0G009260.1	--	K03438|1.7837e-41|olu:OSTLU_33240|K03438 16S rRNA (cytosine1402-N4)-methyltransferase [EC:2.1.1.199] | (RefSeq) hypothetical protein	[R]	General function prediction only	Uncharacterized protein {ECO:0000313|EMBL:ABO97728.1} OS=Ostreococcus lucimarinus (strain CCE9901) PE=3 SV=1	predicted protein [Ostreococcus lucimarinus CCE9901]
Vad01G004940.1	Biological Process: defense response (GO:0006952);; Biological Process: response to biotic stimulus (GO:0009607);;	--	--	--	Putative uncharacterized protein {ECO:0000313|EMBL:CCB50819.1} OS=Vitis vinifera (Grape) PE=4 SV=1	PREDICTED: MLP-like protein 34 [Vitis vinifera]
Vad12G012520.1	Molecular Function: peroxidase activity (GO:0004601);; Cellular Component: cell wall (GO:0005618);; Biological Process: response to oxidative stress (GO:0006979);; Cellular Component: membrane (GO:0016020);; Molecular Function: heme binding (GO:0020037);; Biological Process: respiratory burst (GO:0045730);; Molecular Function: metal ion binding (GO:0046872);; Cellular Component: apoplast (GO:0048…	K00430|0|vvi:100262265|K00430 peroxidase [EC:1.11.1.7] | (RefSeq) peroxidase N1	--	--	Putative uncharacterized protein {ECO:0000313|EMBL:CCB46167.1} OS=Vitis vinifera (Grape) PE=3 SV=1	PREDICTED: peroxidase N1 [Vitis vinifera]
Vad0G001090.1	--	K03046|6.16672e-26|vcn:VOLCADRAFT_72009|K03046 DNA-directed RNA polymerase subunit beta' [EC:2.7.7.6] | (RefSeq) hypothetical protein	--	--	DNA-directed RNA polymerase subunit beta'' {ECO:0000256|HAMAP-Rule:MF_01324} OS=Gracilaria salicornia PE=3 SV=1	RNA polymerase beta&apos;&apos; subunit (chloroplast) [Gracilaria salicornia]
Vad11G003840.1	Molecular Function: secondary active sulfate transmembrane transporter activity (GO:0008271);; Biological Process: sulfate transport (GO:0008272);; Cellular Component: integral component of membrane (GO:0016021);; Biological Process: transmembrane transport (GO:0055085);;	K17471|0|vvi:100262777|K17471 sulfate transporter 3 | (RefSeq) probable sulfate transporter 3.4	[P]	Inorganic ion transport and metabolism	Putative uncharacterized protein {ECO:0000313|EMBL:CCB51530.1} OS=Vitis vinifera (Grape) PE=4 SV=1	PREDICTED: probable sulfate transporter 3.4 isoform X1 [Vitis vinifera]
Vad13G011950.1	--	K08853|0|vvi:100258075|K08853 AP2-associated kinase [EC:2.7.11.1] | (RefSeq) probable serine/threonine-protein kinase DDB_G0276461	[T]	Signal transduction mechanisms	Putative uncharacterized protein {ECO:0000313|EMBL:CCB56716.1} OS=Vitis vinifera (Grape) PE=4 SV=1	PREDICTED: probable serine/threonine-protein kinase DDB_G0276461 isoform X1 [Vitis vinifera]
Vad03G001970.1	--	K10581|0|vvi:100258896|K10581 ubiquitin-conjugating enzyme E2 O [EC:2.3.2.24] | (RefSeq) probable ubiquitin-conjugating enzyme E2 23	[O]	Posttranslational modification, protein turnover, chaperones	Putative uncharacterized protein {ECO:0000313|EMBL:CCB60610.1} OS=Vitis vinifera (Grape) PE=4 SV=1	PREDICTED: probable ubiquitin-conjugating enzyme E2 23 isoform X2 [Vitis vinifera]
Vad04G005950.1	Molecular Function: translation initiation factor activity (GO:0003743);; Molecular Function: translation elongation factor activity (GO:0003746);; Biological Process: translational initiation (GO:0006413);; Biological Process: translational frameshifting (GO:0006452);; Biological Process: peptidyl-lysine modification to peptidyl-hypusine (GO:0008612);; Molecular Function: ribosome binding (GO:00…	K03263|1.15737e-114|vvi:100247352|K03263 translation initiation factor 5A | (RefSeq) eukaryotic translation initiation factor 5A-2	[J]	Translation, ribosomal structure and biogenesis	Putative uncharacterized protein {ECO:0000313|EMBL:CAN62058.1} OS=Vitis vinifera (Grape) PE=4 SV=1	PREDICTED: eukaryotic translation initiation factor 5A-2 [Vitis vinifera]
Vad04G012590.1	Biological Process: response to reactive oxygen species (GO:0000302);; Molecular Function: copper ion binding (GO:0005507);; Cellular Component: mitochondrion (GO:0005739);; Cellular Component: vacuole (GO:0005773);; Cellular Component: cytosol (GO:0005829);; Cellular Component: plasma membrane (GO:0005886);; Biological Process: glycolytic process (GO:0006096);; Biological Process: citrate metabo…	K01681|0|vvi:100242027|K01681 aconitate hydratase [EC:4.2.1.3] | (RefSeq) aconitate hydratase 1	[AJ]	--	Putative uncharacterized protein {ECO:0000313|EMBL:CBI24446.3} OS=Vitis vinifera (Grape) PE=4 SV=1	unnamed protein product [Vitis vinifera]
Vad05G011440.1	Molecular Function: GTPase activator activity (GO:0005097);; Biological Process: positive regulation of GTPase activity (GO:0032851);;	--	[T]	Signal transduction mechanisms	Putative uncharacterized protein {ECO:0000313|EMBL:CCB44538.1} OS=Vitis vinifera (Grape) PE=4 SV=1	PREDICTED: small G protein signaling modulator 1-like isoform X1 [Vitis vinifera]
Vad19G001850.1	--	--	--	--	Putative uncharacterized protein {ECO:0000313|EMBL:CCB46346.1} OS=Vitis vinifera (Grape) PE=4 SV=1	PREDICTED: calsequestrin-1-like [Vitis vinifera]
Vad15G009710.1	--	--	--	--	Putative uncharacterized protein {ECO:0000313|EMBL:CAN79378.1} OS=Vitis vinifera (Grape) PE=4 SV=1	PREDICTED: UPF0481 protein At3g47200-like [Vitis vinifera]
Vad11G002620.1	Molecular Function: acid phosphatase activity (GO:0003993);;	--	--	--	Putative uncharacterized protein {ECO:0000313|EMBL:CBI27978.3} OS=Vitis vinifera (Grape) PE=4 SV=1	PREDICTED: acid phosphatase 1-like [Vitis vinifera]
Vad0G003200.1	--	--	--	--	Uncharacterized protein {ECO:0000313|EMBL:EJK47525.1} OS=Thalassiosira oceanica (Marine diatom) PE=4 SV=1	--
Vad07G009770.1	Biological Process: protein peptidyl-prolyl isomerization (GO:0000413);; Molecular Function: peptidyl-prolyl cis-trans isomerase activity (GO:0003755);; Molecular Function: calmodulin binding (GO:0005516);; Cellular Component: cytosol (GO:0005829);; Biological Process: protein folding (GO:0006457);; Biological Process: N-terminal protein myristoylation (GO:0006499);; Biological Process: response …	K09571|0|vvi:100266654|K09571 FK506-binding protein 4/5 [EC:5.2.1.8] | (RefSeq) peptidyl-prolyl cis-trans isomerase FKBP62	[O]	Posttranslational modification, protein turnover, chaperones	Putative uncharacterized protein {ECO:0000313|EMBL:CBI29552.3} OS=Vitis vinifera (Grape) PE=4 SV=1	PREDICTED: peptidyl-prolyl cis-trans isomerase FKBP62 isoform X1 [Vitis vinifera]
Vad14G011670.1	Molecular Function: nucleotide binding (GO:0000166);; Biological Process: DNA-dependent DNA replication (GO:0006261);; Biological Process: cell division (GO:0051301);; Cellular Component: Cul4-RING E3 ubiquitin ligase complex (GO:0080008);;	K11790|0|vvi:100249087|K11790 denticleless | (RefSeq) denticleless protein homolog	[S]	Function unknown	Putative uncharacterized protein {ECO:0000313|EMBL:CCB58478.1} OS=Vitis vinifera (Grape) PE=4 SV=1	PREDICTED: denticleless protein homolog A [Vitis vinifera]
Vad10G003180.1	Molecular Function: GTP binding (GO:0005525);; Cellular Component: plasma membrane (GO:0005886);; Biological Process: small GTPase mediated signal transduction (GO:0007264);; Biological Process: protein transport (GO:0015031);;	K07904|1.75252e-166|vvi:104880478|K07904 Ras-related protein Rab-11A | (RefSeq) ras-related protein RABA5a	[U]	Intracellular trafficking, secretion, and vesicular transport	Ras-related protein RABA5a {ECO:0000313|EMBL:EXB56661.1} OS=Morus notabilis PE=3 SV=1	PREDICTED: ras-related protein RABA5a [Vitis vinifera]
Vad12G002000.1	Molecular Function: methyltransferase activity (GO:0008168);; Biological Process: methylation (GO:0032259);;	K20069|0|vvi:100245387|K20069 adaptin ear-binding coat-associated protein 1/2 | (RefSeq) uncharacterized LOC100245387	[H]	Coenzyme transport and metabolism	Putative uncharacterized protein {ECO:0000313|EMBL:CBI21965.3} OS=Vitis vinifera (Grape) PE=4 SV=1	unnamed protein product [Vitis vinifera]
Vad0G008170.1	--	--	[O]	Posttranslational modification, protein turnover, chaperones	Rotamase, putative {ECO:0000313|EMBL:EEF24668.1} OS=Ricinus communis (Castor bean) PE=4 SV=1	rotamase, putative [Ricinus communis]
Vad03G001690.1	Cellular Component: integral component of membrane (GO:0016021);;	--	[E]	Amino acid transport and metabolism	Putative uncharacterized protein {ECO:0000313|EMBL:CBI37884.3} OS=Vitis vinifera (Grape) PE=4 SV=1	PREDICTED: amino acid permease 3 [Vitis vinifera]
Vad05G009520.1	--	--	--	--	Putative uncharacterized protein {ECO:0000313|EMBL:CCB61586.1} OS=Vitis vinifera (Grape) PE=4 SV=1	PREDICTED: F-box/kelch-repeat protein At3g06240-like [Vitis vinifera]
Vad02G006290.1	--	--	--	--	Putative uncharacterized protein {ECO:0000313|EMBL:CBI25850.3} OS=Vitis vinifera (Grape) PE=4 SV=1	unnamed protein product [Vitis vinifera]
Vad04G003820.1	Biological Process: regulation of cyclin-dependent protein serine/threonine kinase activity (GO:0000079);; Cellular Component: nucleus (GO:0005634);; Molecular Function: protein kinase binding (GO:0019901);; Biological Process: cell division (GO:0051301);;	K06627|0|vvi:100245617|K06627 cyclin A | (RefSeq) cyclin-A2-2	[D]	Cell cycle control, cell division, chromosome partitioning	Putative uncharacterized protein {ECO:0000313|EMBL:CBI20929.3} OS=Vitis vinifera (Grape) PE=3 SV=1	unnamed protein product [Vitis vinifera]
Vad03G005250.1	Molecular Function: DNA binding (GO:0003677);; Cellular Component: nucleus (GO:0005634);; Biological Process: regulation of transcription, DNA-templated (GO:0006355);;	--	--	--	Putative uncharacterized protein {ECO:0000313|EMBL:CBI32500.3} OS=Vitis vinifera (Grape) PE=4 SV=1	unnamed protein product [Vitis vinifera]
Vad07G004940.1	Molecular Function: DNA binding (GO:0003677);;	--	--	--	Putative uncharacterized protein {ECO:0000313|EMBL:CBI36980.3} OS=Vitis vinifera (Grape) PE=4 SV=1	unnamed protein product [Vitis vinifera]
Vad18G015070.1	Molecular Function: translation release factor activity (GO:0003747);; Biological Process: translational termination (GO:0006415);; Biological Process: heme biosynthetic process (GO:0006783);; Cellular Component: chloroplast (GO:0009507);;	--	[J]	Translation, ribosomal structure and biogenesis	Putative uncharacterized protein {ECO:0000313|EMBL:CBI16955.3} OS=Vitis vinifera (Grape) PE=4 SV=1	PREDICTED: uncharacterized protein LOC100244867 [Vitis vinifera]
Vad17G007480.1	Molecular Function: binding (GO:0005488);; Biological Process: response to abscisic acid (GO:0009737);; Biological Process: cellular process (GO:0009987);; Cellular Component: intracellular part (GO:0044424);; Biological Process: biological_process (GO:0044699);;	K16274|7.379e-37|vvi:100247386|K16274 E3 ubiquitin-protein ligase AIP2 [EC:2.3.2.27] | (RefSeq) E3 ubiquitin-protein ligase AIP2	[O]	Posttranslational modification, protein turnover, chaperones	Putative uncharacterized protein {ECO:0000313|EMBL:CBI20751.3} OS=Vitis vinifera (Grape) PE=4 SV=1	unnamed protein product [Vitis vinifera]
Vad10G007720.1	--	--	--	--	Putative uncharacterized protein {ECO:0000313|EMBL:CCB55722.1} OS=Vitis vinifera (Grape) PE=4 SV=1	PREDICTED: probable LRR receptor-like serine/threonine-protein kinase At1g07650 isoform X1 [Vitis vinifera]
Vad13G005800.1	Molecular Function: adenosine kinase activity (GO:0004001);; Molecular Function: copper ion binding (GO:0005507);; Cellular Component: plasma membrane (GO:0005886);; Biological Process: purine ribonucleoside salvage (GO:0006166);; Biological Process: AMP biosynthetic process (GO:0006167);; Cellular Component: chloroplast (GO:0009507);; Biological Process: phosphorylation (GO:0016310);; Molecular …	K00856|0|vvi:100246211|K00856 adenosine kinase [EC:2.7.1.20] | (RefSeq) adenosine kinase 2	[G]	Carbohydrate transport and metabolism	Putative uncharacterized protein {ECO:0000313|EMBL:CCB56173.1} OS=Vitis vinifera (Grape) PE=4 SV=1	unnamed protein product [Vitis vinifera]
Vad07G008500.1	--	--	[K]	Transcription	Putative uncharacterized protein {ECO:0000313|EMBL:CAN62739.1} OS=Vitis vinifera (Grape) PE=4 SV=1	PREDICTED: cilia- and flagella-associated protein 20 isoform X1 [Vitis vinifera]
Vad18G006000.1	Molecular Function: RNA binding (GO:0003723);;	K13162|0|vvi:100267715|K13162 poly(rC)-binding protein 2/3/4 | (RefSeq) KH domain-containing protein HEN4	[AR]	--	Putative uncharacterized protein {ECO:0000313|EMBL:CCB45703.1} OS=Vitis vinifera (Grape) PE=4 SV=1	PREDICTED: KH domain-containing protein At4g18375-like [Vitis vinifera]
Vad01G011810.1	Molecular Function: oxidoreductase activity, acting on single donors with incorporation of molecular oxygen, incorporation of two atoms of oxygen (GO:0016702);; Molecular Function: gibberellin 3-beta-dioxygenase activity (GO:0016707);; Biological Process: oxidation-reduction process (GO:0055114);;	K04125|0|vvi:100854674|K04125 gibberellin 2-oxidase [EC:1.14.11.13] | (RefSeq) GA2ox4; gibberellin 2-beta-dioxygenase 8	[QR]	--	Putative uncharacterized protein {ECO:0000313|EMBL:CCB51200.1} OS=Vitis vinifera (Grape) PE=3 SV=1	unnamed protein product [Vitis vinifera]
Vad08G011480.1	Molecular Function: magnesium ion binding (GO:0000287);; Molecular Function: pyruvate kinase activity (GO:0004743);; Cellular Component: plasma membrane (GO:0005886);; Biological Process: glycolytic process (GO:0006096);; Biological Process: phosphorylation (GO:0016310);; Molecular Function: potassium ion binding (GO:0030955);; Biological Process: response to cadmium ion (GO:0046686);;	K00873|0|vvi:100261276|K00873 pyruvate kinase [EC:2.7.1.40] | (RefSeq) pyruvate kinase 1, cytosolic	[G]	Carbohydrate transport and metabolism	Pyruvate kinase {ECO:0000256|RuleBase:RU000504} OS=Vitis vinifera (Grape) PE=3 SV=1	PREDICTED: pyruvate kinase, cytosolic isozyme-like [Vitis vinifera]
Vad06G009410.1	Molecular Function: monooxygenase activity (GO:0004497);; Molecular Function: iron ion binding (GO:0005506);; Molecular Function: electron transfer activity (GO:0009055);; Molecular Function: oxidoreductase activity, acting on paired donors, with incorporation or reduction of molecular oxygen (GO:0016705);; Molecular Function: heme binding (GO:0020037);; Biological Process: oxidation-reduction pr…	K12153|0|vvi:100260154|K12153 phenylalanine N-monooxygenase [EC:1.14.13.124] | (RefSeq) phenylalanine N-monooxygenase	[Q]	Secondary metabolites biosynthesis, transport and catabolism	Putative uncharacterized protein {ECO:0000313|EMBL:CCB58747.1} OS=Vitis vinifera (Grape) PE=3 SV=1	PREDICTED: phenylalanine N-monooxygenase [Vitis vinifera]
Vad09G004380.1	Cellular Component: nucleus (GO:0005634);; Biological Process: regulation of transcription, DNA-templated (GO:0006355);; Biological Process: de-etiolation (GO:0009704);; Biological Process: auxin-activated signaling pathway (GO:0009734);; Molecular Function: protein dimerization activity (GO:0046983);; Biological Process: stamen filament development (GO:0080086);;	K14484|5.07483e-140|vvi:100854934|K14484 auxin-responsive protein IAA | (RefSeq) auxin-induced protein 22A-like	--	--	Auxin-responsive protein {ECO:0000256|RuleBase:RU004549} OS=Vitis vinifera (Grape) PE=3 SV=1	hypothetical protein VITISV_010218 [Vitis vinifera]
[truncated: 26,695 more rows]

## Sheet: Table S10
Supplementary Table 10. Genome data of the other nine representative plant species used in this study.
Plants	Species	Abbreviations	Sources
PN40024	Vitis vinifera	V. vinifera	http://plants.ensembl.org/Vitis_vinifera/Info/Index
Riparia Gloire de Montpellier	Vitis riparia	V. riparia	https://www.ncbi.nlm.nih.gov/genome/13150
[truncated: 7 more rows]

[truncated: 14 more sheets: Table S11, Table S12, Table S13, Table S14, Table S15, Table S16, Table S17, Table S18, Table S19, Table S20, Table S21, Table S22, Table S23, Table S24]
